# Supplementary material for: Quantifying antibody kinetics and RNA detection during early-phase SARS-CoV-2 infection by time since symptom onset
Source: eLife. 2020 Sep 7;9:e60122. doi: 10.7554/eLife.60122 (PMC7508557; doi:10.7554/eLife.60122)
Supplement: Source data 1. [file elife-60122-data1.csv]

sample.size	id	time.start	time.stop	time.error	time.error.type	time.estimate.cat	time.cat	test.result	test.type	test.error	test.error.type	exact.or.estimated	dilutions	endpoint	units	cutoff	prop.pos	data.source	marker	sample.type	peak	first.detection	severity	disease.asymp	assay	antigen	virus	host	location	author	year	doi	comments	added.by	sample.size.original	study	id.original	time.start.original	time.stop.original	time.estimate.cat.original	time.cat.original	units.original	test.result.original	cutoff.original	test.pos.neg	test.error.original	test.error.type.original	exact.or.estimated.original	dilutions.original
1	Adams_COV19-00166407	60	60	NA	NA	Exact	Symptom onset	0	NA	NA	NA	Exact	NA	NA	OD	0.07	NA	S6 Table	IgM	Serum_Plasma	NA	NA	Mild_Moderate	Diseased	ELISA	Spike	SARS-CoV-2	Human	UK? (Public Health England (contact tracing))	Adams	2020	10.1101/2020.04.15.20066407	﻿﻿Authors state in MS: all cases ﻿positive for SARS-CoV-2 by RT-PCR from an upper respiratory tract (nose/throat) swab tested in accredited laboratories. Cases were classified following WHO criteria as critical (respiratory failure, septic shock, and/or multiple organ dysfunction/failure); severe (dyspnoea, respiratory frequency ≥30/minute, blood oxygen saturation ≤93%, PaO2/FiO2 ratio <300, and/…	KP	1	Adams_2020_66407	COV19-001	60	60	exact	symptom onset	OD	0	7.00E-02	NEG	NA	NA	exact	NA
1	Adams_COV19-00266407	56	56	NA	NA	Exact	Symptom onset	0.401	NA	NA	NA	Exact	NA	NA	OD	0.07	NA	S6 Table	IgM	Serum_Plasma	NA	NA	Mild_Moderate	Diseased	ELISA	Spike	SARS-CoV-2	Human	UK? (Public Health England (contact tracing))	Adams	2020	10.1101/2020.04.15.20066407	﻿﻿Authors state in MS: all cases ﻿positive for SARS-CoV-2 by RT-PCR from an upper respiratory tract (nose/throat) swab tested in accredited laboratories. Cases were classified following WHO criteria as critical (respiratory failure, septic shock, and/or multiple organ dysfunction/failure); severe (dyspnoea, respiratory frequency ≥30/minute, blood oxygen saturation ≤93%, PaO2/FiO2 ratio <300, and/…	KP	1	Adams_2020_66407	COV19-002	56	56	exact	symptom onset	OD	0.401	7.00E-02	POS	NA	NA	exact	NA
1	Adams_COV19-00366407	55	55	NA	NA	Exact	Symptom onset	0	NA	NA	NA	Exact	NA	NA	OD	0.07	NA	S6 Table	IgM	Serum_Plasma	NA	NA	Mild_Moderate	Diseased	ELISA	Spike	SARS-CoV-2	Human	UK? (Public Health England (contact tracing))	Adams	2020	10.1101/2020.04.15.20066407	﻿﻿Authors state in MS: all cases ﻿positive for SARS-CoV-2 by RT-PCR from an upper respiratory tract (nose/throat) swab tested in accredited laboratories. Cases were classified following WHO criteria as critical (respiratory failure, septic shock, and/or multiple organ dysfunction/failure); severe (dyspnoea, respiratory frequency ≥30/minute, blood oxygen saturation ≤93%, PaO2/FiO2 ratio <300, and/…	KP	1	Adams_2020_66407	COV19-003	55	55	exact	symptom onset	OD	0	7.00E-02	NEG	NA	NA	exact	NA
1	Adams_COV19-00466407	54	54	NA	NA	Exact	Symptom onset	0	NA	NA	NA	Exact	NA	NA	OD	0.07	NA	S6 Table	IgM	Serum_Plasma	NA	NA	Mild_Moderate	Diseased	ELISA	Spike	SARS-CoV-2	Human	UK? (Public Health England (contact tracing))	Adams	2020	10.1101/2020.04.15.20066407	﻿﻿Authors state in MS: all cases ﻿positive for SARS-CoV-2 by RT-PCR from an upper respiratory tract (nose/throat) swab tested in accredited laboratories. Cases were classified following WHO criteria as critical (respiratory failure, septic shock, and/or multiple organ dysfunction/failure); severe (dyspnoea, respiratory frequency ≥30/minute, blood oxygen saturation ≤93%, PaO2/FiO2 ratio <300, and/…	KP	1	Adams_2020_66407	COV19-004	54	54	exact	symptom onset	OD	0	7.00E-02	NEG	NA	NA	exact	NA
1	Adams_COV19-00566407	58	58	NA	NA	Exact	Symptom onset	0	NA	NA	NA	Exact	NA	NA	OD	0.07	NA	S6 Table	IgM	Serum_Plasma	NA	NA	Asymptomatic	Asymptomatic	ELISA	Spike	SARS-CoV-2	Human	UK? (Public Health England (contact tracing))	Adams	2020	10.1101/2020.04.15.20066407	﻿﻿Authors state in MS: all cases ﻿positive for SARS-CoV-2 by RT-PCR from an upper respiratory tract (nose/throat) swab tested in accredited laboratories. Cases were classified following WHO criteria as critical (respiratory failure, septic shock, and/or multiple organ dysfunction/failure); severe (dyspnoea, respiratory frequency ≥30/minute, blood oxygen saturation ≤93%, PaO2/FiO2 ratio <300, and/…	KP	1	Adams_2020_66407	COV19-005	58	58	exact	symptom onset	OD	0	7.00E-02	NEG	NA	NA	exact	NA
1	Adams_COV19-00666407	58	58	NA	NA	Exact	Symptom onset	0.7365	NA	NA	NA	Exact	NA	NA	OD	0.07	NA	S6 Table	IgM	Serum_Plasma	NA	NA	Mild_Moderate	Diseased	ELISA	Spike	SARS-CoV-2	Human	UK? (Public Health England (contact tracing))	Adams	2020	10.1101/2020.04.15.20066407	﻿﻿Authors state in MS: all cases ﻿positive for SARS-CoV-2 by RT-PCR from an upper respiratory tract (nose/throat) swab tested in accredited laboratories. Cases were classified following WHO criteria as critical (respiratory failure, septic shock, and/or multiple organ dysfunction/failure); severe (dyspnoea, respiratory frequency ≥30/minute, blood oxygen saturation ≤93%, PaO2/FiO2 ratio <300, and/…	KP	1	Adams_2020_66407	COV19-006	58	58	exact	symptom onset	OD	0.7365	7.00E-02	POS	NA	NA	exact	NA
1	Adams_COV19-00766407	62	62	NA	NA	Exact	Symptom onset	0.1055	NA	NA	NA	Exact	NA	NA	OD	0.07	NA	S6 Table	IgM	Serum_Plasma	NA	NA	Mild_Moderate	Diseased	ELISA	Spike	SARS-CoV-2	Human	UK? (Public Health England (contact tracing))	Adams	2020	10.1101/2020.04.15.20066407	﻿﻿Authors state in MS: all cases ﻿positive for SARS-CoV-2 by RT-PCR from an upper respiratory tract (nose/throat) swab tested in accredited laboratories. Cases were classified following WHO criteria as critical (respiratory failure, septic shock, and/or multiple organ dysfunction/failure); severe (dyspnoea, respiratory frequency ≥30/minute, blood oxygen saturation ≤93%, PaO2/FiO2 ratio <300, and/…	KP	1	Adams_2020_66407	COV19-007	62	62	exact	symptom onset	OD	0.1055	7.00E-02	POS	NA	NA	exact	NA
1	Adams_COV19-00866407	53	53	NA	NA	Exact	Symptom onset	0.594	NA	NA	NA	Exact	NA	NA	OD	0.07	NA	S6 Table	IgM	Serum_Plasma	NA	NA	Mild_Moderate	Diseased	ELISA	Spike	SARS-CoV-2	Human	UK? (Public Health England (contact tracing))	Adams	2020	10.1101/2020.04.15.20066407	﻿﻿Authors state in MS: all cases ﻿positive for SARS-CoV-2 by RT-PCR from an upper respiratory tract (nose/throat) swab tested in accredited laboratories. Cases were classified following WHO criteria as critical (respiratory failure, septic shock, and/or multiple organ dysfunction/failure); severe (dyspnoea, respiratory frequency ≥30/minute, blood oxygen saturation ≤93%, PaO2/FiO2 ratio <300, and/…	KP	1	Adams_2020_66407	COV19-008	53	53	exact	symptom onset	OD	0.594	7.00E-02	POS	NA	NA	exact	NA
1	Adams_COV19-00966407	57	57	NA	NA	Exact	Symptom onset	0.5775	NA	NA	NA	Exact	NA	NA	OD	0.07	NA	S6 Table	IgM	Serum_Plasma	NA	NA	Mild_Moderate	Diseased	ELISA	Spike	SARS-CoV-2	Human	UK? (Public Health England (contact tracing))	Adams	2020	10.1101/2020.04.15.20066407	﻿﻿Authors state in MS: all cases ﻿positive for SARS-CoV-2 by RT-PCR from an upper respiratory tract (nose/throat) swab tested in accredited laboratories. Cases were classified following WHO criteria as critical (respiratory failure, septic shock, and/or multiple organ dysfunction/failure); severe (dyspnoea, respiratory frequency ≥30/minute, blood oxygen saturation ≤93%, PaO2/FiO2 ratio <300, and/…	KP	1	Adams_2020_66407	COV19-009	57	57	exact	symptom onset	OD	0.5775	7.00E-02	POS	NA	NA	exact	NA
1	Adams_COV19-01066407	40	40	NA	NA	Exact	Symptom onset	0.1295	NA	NA	NA	Exact	NA	NA	OD	0.07	NA	S6 Table	IgM	Serum_Plasma	NA	NA	Mild_Moderate	Diseased	ELISA	Spike	SARS-CoV-2	Human	UK? (Public Health England (contact tracing))	Adams	2020	10.1101/2020.04.15.20066407	﻿﻿Authors state in MS: all cases ﻿positive for SARS-CoV-2 by RT-PCR from an upper respiratory tract (nose/throat) swab tested in accredited laboratories. Cases were classified following WHO criteria as critical (respiratory failure, septic shock, and/or multiple organ dysfunction/failure); severe (dyspnoea, respiratory frequency ≥30/minute, blood oxygen saturation ≤93%, PaO2/FiO2 ratio <300, and/…	KP	1	Adams_2020_66407	COV19-010	40	40	exact	symptom onset	OD	0.1295	7.00E-02	POS	NA	NA	exact	NA
1	Adams_COV19-01166407	41	41	NA	NA	Exact	Symptom onset	0	NA	NA	NA	Exact	NA	NA	OD	0.07	NA	S6 Table	IgM	Serum_Plasma	NA	NA	Mild_Moderate	Diseased	ELISA	Spike	SARS-CoV-2	Human	UK? (Public Health England (contact tracing))	Adams	2020	10.1101/2020.04.15.20066407	﻿﻿Authors state in MS: all cases ﻿positive for SARS-CoV-2 by RT-PCR from an upper respiratory tract (nose/throat) swab tested in accredited laboratories. Cases were classified following WHO criteria as critical (respiratory failure, septic shock, and/or multiple organ dysfunction/failure); severe (dyspnoea, respiratory frequency ≥30/minute, blood oxygen saturation ≤93%, PaO2/FiO2 ratio <300, and/…	KP	1	Adams_2020_66407	COV19-011	41	41	exact	symptom onset	OD	0	7.00E-02	NEG	NA	NA	exact	NA
1	Adams_COV19-01266407	41	41	NA	NA	Exact	Symptom onset	0	NA	NA	NA	Exact	NA	NA	OD	0.07	NA	S6 Table	IgM	Serum_Plasma	NA	NA	Mild_Moderate	Diseased	ELISA	Spike	SARS-CoV-2	Human	UK? (Public Health England (contact tracing))	Adams	2020	10.1101/2020.04.15.20066407	﻿﻿Authors state in MS: all cases ﻿positive for SARS-CoV-2 by RT-PCR from an upper respiratory tract (nose/throat) swab tested in accredited laboratories. Cases were classified following WHO criteria as critical (respiratory failure, septic shock, and/or multiple organ dysfunction/failure); severe (dyspnoea, respiratory frequency ≥30/minute, blood oxygen saturation ≤93%, PaO2/FiO2 ratio <300, and/…	KP	1	Adams_2020_66407	COV19-012	41	41	exact	symptom onset	OD	0	7.00E-02	NEG	NA	NA	exact	NA
1	Adams_COV19-01366407	42	42	NA	NA	Exact	Symptom onset	0.223	NA	NA	NA	Exact	NA	NA	OD	0.07	NA	S6 Table	IgM	Serum_Plasma	NA	NA	Mild_Moderate	Diseased	ELISA	Spike	SARS-CoV-2	Human	UK? (Public Health England (contact tracing))	Adams	2020	10.1101/2020.04.15.20066407	﻿﻿Authors state in MS: all cases ﻿positive for SARS-CoV-2 by RT-PCR from an upper respiratory tract (nose/throat) swab tested in accredited laboratories. Cases were classified following WHO criteria as critical (respiratory failure, septic shock, and/or multiple organ dysfunction/failure); severe (dyspnoea, respiratory frequency ≥30/minute, blood oxygen saturation ≤93%, PaO2/FiO2 ratio <300, and/…	KP	1	Adams_2020_66407	COV19-013	42	42	exact	symptom onset	OD	0.223	7.00E-02	POS	NA	NA	exact	NA
1	Adams_COV19-01466407	41	41	NA	NA	Exact	Symptom onset	0.6185	NA	NA	NA	Exact	NA	NA	OD	0.07	NA	S6 Table	IgM	Serum_Plasma	NA	NA	Mild_Moderate	Diseased	ELISA	Spike	SARS-CoV-2	Human	UK? (Public Health England (contact tracing))	Adams	2020	10.1101/2020.04.15.20066407	﻿﻿Authors state in MS: all cases ﻿positive for SARS-CoV-2 by RT-PCR from an upper respiratory tract (nose/throat) swab tested in accredited laboratories. Cases were classified following WHO criteria as critical (respiratory failure, septic shock, and/or multiple organ dysfunction/failure); severe (dyspnoea, respiratory frequency ≥30/minute, blood oxygen saturation ≤93%, PaO2/FiO2 ratio <300, and/…	KP	1	Adams_2020_66407	COV19-014	41	41	exact	symptom onset	OD	0.6185	7.00E-02	POS	NA	NA	exact	NA
1	Adams_COV19-01566407	42	42	NA	NA	Exact	Symptom onset	0.168	NA	NA	NA	Exact	NA	NA	OD	0.07	NA	S6 Table	IgM	Serum_Plasma	NA	NA	Mild_Moderate	Diseased	ELISA	Spike	SARS-CoV-2	Human	UK? (Public Health England (contact tracing))	Adams	2020	10.1101/2020.04.15.20066407	﻿﻿Authors state in MS: all cases ﻿positive for SARS-CoV-2 by RT-PCR from an upper respiratory tract (nose/throat) swab tested in accredited laboratories. Cases were classified following WHO criteria as critical (respiratory failure, septic shock, and/or multiple organ dysfunction/failure); severe (dyspnoea, respiratory frequency ≥30/minute, blood oxygen saturation ≤93%, PaO2/FiO2 ratio <300, and/…	KP	1	Adams_2020_66407	COV19-015	42	42	exact	symptom onset	OD	0.168	7.00E-02	POS	NA	NA	exact	NA
1	Adams_COV19-01866407	36	36	NA	NA	Exact	Symptom onset	0.2885	NA	NA	NA	Exact	NA	NA	OD	0.07	NA	S6 Table	IgM	Serum_Plasma	NA	NA	Mild_Moderate	Diseased	ELISA	Spike	SARS-CoV-2	Human	UK? (Public Health England (contact tracing))	Adams	2020	10.1101/2020.04.15.20066407	﻿﻿Authors state in MS: all cases ﻿positive for SARS-CoV-2 by RT-PCR from an upper respiratory tract (nose/throat) swab tested in accredited laboratories. Cases were classified following WHO criteria as critical (respiratory failure, septic shock, and/or multiple organ dysfunction/failure); severe (dyspnoea, respiratory frequency ≥30/minute, blood oxygen saturation ≤93%, PaO2/FiO2 ratio <300, and/…	KP	1	Adams_2020_66407	COV19-018	36	36	exact	symptom onset	OD	0.2885	7.00E-02	POS	NA	NA	exact	NA
1	Adams_COV19-01966407	39	39	NA	NA	Exact	Symptom onset	0.2405	NA	NA	NA	Exact	NA	NA	OD	0.07	NA	S6 Table	IgM	Serum_Plasma	NA	NA	Mild_Moderate	Diseased	ELISA	Spike	SARS-CoV-2	Human	UK? (Public Health England (contact tracing))	Adams	2020	10.1101/2020.04.15.20066407	﻿﻿Authors state in MS: all cases ﻿positive for SARS-CoV-2 by RT-PCR from an upper respiratory tract (nose/throat) swab tested in accredited laboratories. Cases were classified following WHO criteria as critical (respiratory failure, septic shock, and/or multiple organ dysfunction/failure); severe (dyspnoea, respiratory frequency ≥30/minute, blood oxygen saturation ≤93%, PaO2/FiO2 ratio <300, and/…	KP	1	Adams_2020_66407	COV19-019	39	39	exact	symptom onset	OD	0.2405	7.00E-02	POS	NA	NA	exact	NA
1	Adams_COV19-02066407	31	31	NA	NA	Exact	Symptom onset	0.1845	NA	NA	NA	Exact	NA	NA	OD	0.07	NA	S6 Table	IgM	Serum_Plasma	NA	NA	Mild_Moderate	Diseased	ELISA	Spike	SARS-CoV-2	Human	UK? (Public Health England (contact tracing))	Adams	2020	10.1101/2020.04.15.20066407	﻿﻿Authors state in MS: all cases ﻿positive for SARS-CoV-2 by RT-PCR from an upper respiratory tract (nose/throat) swab tested in accredited laboratories. Cases were classified following WHO criteria as critical (respiratory failure, septic shock, and/or multiple organ dysfunction/failure); severe (dyspnoea, respiratory frequency ≥30/minute, blood oxygen saturation ≤93%, PaO2/FiO2 ratio <300, and/…	KP	1	Adams_2020_66407	COV19-020	31	31	exact	symptom onset	OD	0.1845	7.00E-02	POS	NA	NA	exact	NA
1	Adams_HCW04_D1466407	12	12	NA	NA	Exact	Symptom onset	0.1715	NA	NA	NA	Exact	NA	NA	OD	0.07	NA	S6 Table	IgM	Serum_Plasma	NA	NA	Mild_Moderate	Diseased	ELISA	Spike	SARS-CoV-2	Human	UK? (Healthcare Workers (UK?))	Adams	2020	10.1101/2020.04.15.20066407	﻿﻿Authors state in MS: all cases ﻿positive for SARS-CoV-2 by RT-PCR from an upper respiratory tract (nose/throat) swab tested in accredited laboratories. Cases were classified following WHO criteria as critical (respiratory failure, septic shock, and/or multiple organ dysfunction/failure); severe (dyspnoea, respiratory frequency ≥30/minute, blood oxygen saturation ≤93%, PaO2/FiO2 ratio <300, and/…	KP	1	Adams_2020_66407	HCW04_D14	12	12	exact	symptom onset	OD	0.1715	7.00E-02	POS	NA	NA	exact	NA
1	Adams_HCW05_D1466407	10	10	NA	NA	Exact	Symptom onset	1.004	NA	NA	NA	Exact	NA	NA	OD	0.07	NA	S6 Table	IgM	Serum_Plasma	NA	NA	Mild_Moderate	Diseased	ELISA	Spike	SARS-CoV-2	Human	UK? (Healthcare Workers (UK?))	Adams	2020	10.1101/2020.04.15.20066407	﻿﻿Authors state in MS: all cases ﻿positive for SARS-CoV-2 by RT-PCR from an upper respiratory tract (nose/throat) swab tested in accredited laboratories. Cases were classified following WHO criteria as critical (respiratory failure, septic shock, and/or multiple organ dysfunction/failure); severe (dyspnoea, respiratory frequency ≥30/minute, blood oxygen saturation ≤93%, PaO2/FiO2 ratio <300, and/…	KP	1	Adams_2020_66407	HCW05_D14	10	10	exact	symptom onset	OD	1.004	7.00E-02	POS	NA	NA	exact	NA
1	Adams_HCW06_D1466407	19	19	NA	NA	Exact	Symptom onset	0.0935	NA	NA	NA	Exact	NA	NA	OD	0.07	NA	S6 Table	IgM	Serum_Plasma	NA	NA	Mild_Moderate	Diseased	ELISA	Spike	SARS-CoV-2	Human	UK? (Healthcare Workers (UK?))	Adams	2020	10.1101/2020.04.15.20066407	﻿﻿Authors state in MS: all cases ﻿positive for SARS-CoV-2 by RT-PCR from an upper respiratory tract (nose/throat) swab tested in accredited laboratories. Cases were classified following WHO criteria as critical (respiratory failure, septic shock, and/or multiple organ dysfunction/failure); severe (dyspnoea, respiratory frequency ≥30/minute, blood oxygen saturation ≤93%, PaO2/FiO2 ratio <300, and/…	KP	1	Adams_2020_66407	HCW06_D14	19	19	exact	symptom onset	OD	0.0935	7.00E-02	POS	NA	NA	exact	NA
1	Adams_HCW07_D1466407	8	8	NA	NA	Exact	Symptom onset	0	NA	NA	NA	Exact	NA	NA	OD	0.07	NA	S6 Table	IgM	Serum_Plasma	NA	NA	Mild_Moderate	Diseased	ELISA	Spike	SARS-CoV-2	Human	UK? (Healthcare Workers (UK?))	Adams	2020	10.1101/2020.04.15.20066407	﻿﻿Authors state in MS: all cases ﻿positive for SARS-CoV-2 by RT-PCR from an upper respiratory tract (nose/throat) swab tested in accredited laboratories. Cases were classified following WHO criteria as critical (respiratory failure, septic shock, and/or multiple organ dysfunction/failure); severe (dyspnoea, respiratory frequency ≥30/minute, blood oxygen saturation ≤93%, PaO2/FiO2 ratio <300, and/…	KP	1	Adams_2020_66407	HCW07_D14	8	8	exact	symptom onset	OD	0	7.00E-02	NEG	NA	NA	exact	NA
1	Adams_HCW08_D1466407	18	18	NA	NA	Exact	Symptom onset	0.419	NA	NA	NA	Exact	NA	NA	OD	0.07	NA	S6 Table	IgM	Serum_Plasma	NA	NA	Mild_Moderate	Diseased	ELISA	Spike	SARS-CoV-2	Human	UK? (Healthcare Workers (UK?))	Adams	2020	10.1101/2020.04.15.20066407	﻿﻿Authors state in MS: all cases ﻿positive for SARS-CoV-2 by RT-PCR from an upper respiratory tract (nose/throat) swab tested in accredited laboratories. Cases were classified following WHO criteria as critical (respiratory failure, septic shock, and/or multiple organ dysfunction/failure); severe (dyspnoea, respiratory frequency ≥30/minute, blood oxygen saturation ≤93%, PaO2/FiO2 ratio <300, and/…	KP	1	Adams_2020_66407	HCW08_D14	18	18	exact	symptom onset	OD	0.419	7.00E-02	POS	NA	NA	exact	NA
1	Adams_HCW09_D1466407	14	14	NA	NA	Exact	Symptom onset	0.3585	NA	NA	NA	Exact	NA	NA	OD	0.07	NA	S6 Table	IgM	Serum_Plasma	NA	NA	Mild_Moderate	Diseased	ELISA	Spike	SARS-CoV-2	Human	UK? (Healthcare Workers (UK?))	Adams	2020	10.1101/2020.04.15.20066407	﻿﻿Authors state in MS: all cases ﻿positive for SARS-CoV-2 by RT-PCR from an upper respiratory tract (nose/throat) swab tested in accredited laboratories. Cases were classified following WHO criteria as critical (respiratory failure, septic shock, and/or multiple organ dysfunction/failure); severe (dyspnoea, respiratory frequency ≥30/minute, blood oxygen saturation ≤93%, PaO2/FiO2 ratio <300, and/…	KP	1	Adams_2020_66407	HCW09_D14	14	14	exact	symptom onset	OD	0.3585	7.00E-02	POS	NA	NA	exact	NA
1	Adams_UKCOV003_D366407	9	9	NA	NA	Exact	Symptom onset	0.689	NA	NA	NA	Exact	NA	NA	OD	0.07	NA	S6 Table	IgM	Serum_Plasma	NA	NA	Severe_Critical	Diseased	ELISA	Spike	SARS-CoV-2	Human	UK? (Oxford University Hospitals NHS Foundation Trust)	Adams	2020	10.1101/2020.04.15.20066407	﻿﻿Authors state in MS: all cases ﻿positive for SARS-CoV-2 by RT-PCR from an upper respiratory tract (nose/throat) swab tested in accredited laboratories. Cases were classified following WHO criteria as critical (respiratory failure, septic shock, and/or multiple organ dysfunction/failure); severe (dyspnoea, respiratory frequency ≥30/minute, blood oxygen saturation ≤93%, PaO2/FiO2 ratio <300, and/…	KP	1	Adams_2020_66407	UKCOV003_D3	9	9	exact	symptom onset	OD	0.689	7.00E-02	POS	NA	NA	exact	NA
1	Adams_UKCOV005_D366407	12	12	NA	NA	Exact	Symptom onset	0.594	NA	NA	NA	Exact	NA	NA	OD	0.07	NA	S6 Table	IgM	Serum_Plasma	NA	NA	Severe_Critical	Diseased	ELISA	Spike	SARS-CoV-2	Human	UK? (Oxford University Hospitals NHS Foundation Trust)	Adams	2020	10.1101/2020.04.15.20066407	﻿﻿Authors state in MS: all cases ﻿positive for SARS-CoV-2 by RT-PCR from an upper respiratory tract (nose/throat) swab tested in accredited laboratories. Cases were classified following WHO criteria as critical (respiratory failure, septic shock, and/or multiple organ dysfunction/failure); severe (dyspnoea, respiratory frequency ≥30/minute, blood oxygen saturation ≤93%, PaO2/FiO2 ratio <300, and/…	KP	1	Adams_2020_66407	UKCOV005_D3	12	12	exact	symptom onset	OD	0.594	7.00E-02	POS	NA	NA	exact	NA
1	Adams_UKCOV006_D566407	5	5	NA	NA	Exact	Symptom onset	0	NA	NA	NA	Exact	NA	NA	OD	0.07	NA	S6 Table	IgM	Serum_Plasma	NA	NA	Mild_Moderate	Diseased	ELISA	Spike	SARS-CoV-2	Human	UK? (Oxford University Hospitals NHS Foundation Trust)	Adams	2020	10.1101/2020.04.15.20066407	﻿﻿Authors state in MS: all cases ﻿positive for SARS-CoV-2 by RT-PCR from an upper respiratory tract (nose/throat) swab tested in accredited laboratories. Cases were classified following WHO criteria as critical (respiratory failure, septic shock, and/or multiple organ dysfunction/failure); severe (dyspnoea, respiratory frequency ≥30/minute, blood oxygen saturation ≤93%, PaO2/FiO2 ratio <300, and/…	KP	1	Adams_2020_66407	UKCOV006_D5	5	5	exact	symptom onset	OD	0	7.00E-02	NEG	NA	NA	exact	NA
1	Adams_UKCOV007_D366407	6	6	NA	NA	Exact	Symptom onset	0	NA	NA	NA	Exact	NA	NA	OD	0.07	NA	S6 Table	IgM	Serum_Plasma	NA	NA	Severe_Critical	Diseased	ELISA	Spike	SARS-CoV-2	Human	UK? (Oxford University Hospitals NHS Foundation Trust)	Adams	2020	10.1101/2020.04.15.20066407	﻿﻿Authors state in MS: all cases ﻿positive for SARS-CoV-2 by RT-PCR from an upper respiratory tract (nose/throat) swab tested in accredited laboratories. Cases were classified following WHO criteria as critical (respiratory failure, septic shock, and/or multiple organ dysfunction/failure); severe (dyspnoea, respiratory frequency ≥30/minute, blood oxygen saturation ≤93%, PaO2/FiO2 ratio <300, and/…	KP	1	Adams_2020_66407	UKCOV007_D3	6	6	exact	symptom onset	OD	0	7.00E-02	NEG	NA	NA	exact	NA
1	Adams_UKCOV017_D366407	9	9	NA	NA	Exact	Symptom onset	0	NA	NA	NA	Exact	NA	NA	OD	0.07	NA	S6 Table	IgM	Serum_Plasma	NA	NA	Severe_Critical	Diseased	ELISA	Spike	SARS-CoV-2	Human	UK? (Oxford University Hospitals NHS Foundation Trust)	Adams	2020	10.1101/2020.04.15.20066407	﻿﻿Authors state in MS: all cases ﻿positive for SARS-CoV-2 by RT-PCR from an upper respiratory tract (nose/throat) swab tested in accredited laboratories. Cases were classified following WHO criteria as critical (respiratory failure, septic shock, and/or multiple organ dysfunction/failure); severe (dyspnoea, respiratory frequency ≥30/minute, blood oxygen saturation ≤93%, PaO2/FiO2 ratio <300, and/…	KP	1	Adams_2020_66407	UKCOV017_D3	9	9	exact	symptom onset	OD	0	7.00E-02	NEG	NA	NA	exact	NA
1	Adams_UKCOV018_D366407	11	11	NA	NA	Exact	Symptom onset	0.2015	NA	NA	NA	Exact	NA	NA	OD	0.07	NA	S6 Table	IgM	Serum_Plasma	NA	NA	Mild_Moderate	Diseased	ELISA	Spike	SARS-CoV-2	Human	UK? (Oxford University Hospitals NHS Foundation Trust)	Adams	2020	10.1101/2020.04.15.20066407	﻿﻿Authors state in MS: all cases ﻿positive for SARS-CoV-2 by RT-PCR from an upper respiratory tract (nose/throat) swab tested in accredited laboratories. Cases were classified following WHO criteria as critical (respiratory failure, septic shock, and/or multiple organ dysfunction/failure); severe (dyspnoea, respiratory frequency ≥30/minute, blood oxygen saturation ≤93%, PaO2/FiO2 ratio <300, and/…	KP	1	Adams_2020_66407	UKCOV018_D3	11	11	exact	symptom onset	OD	0.2015	7.00E-02	POS	NA	NA	exact	NA
1	Adams_UKCOV019_D566407	16	16	NA	NA	Exact	Symptom onset	0.0955	NA	NA	NA	Exact	NA	NA	OD	0.07	NA	S6 Table	IgM	Serum_Plasma	NA	NA	Severe_Critical	Diseased	ELISA	Spike	SARS-CoV-2	Human	UK? (Oxford University Hospitals NHS Foundation Trust)	Adams	2020	10.1101/2020.04.15.20066407	﻿﻿Authors state in MS: all cases ﻿positive for SARS-CoV-2 by RT-PCR from an upper respiratory tract (nose/throat) swab tested in accredited laboratories. Cases were classified following WHO criteria as critical (respiratory failure, septic shock, and/or multiple organ dysfunction/failure); severe (dyspnoea, respiratory frequency ≥30/minute, blood oxygen saturation ≤93%, PaO2/FiO2 ratio <300, and/…	KP	1	Adams_2020_66407	UKCOV019_D5	16	16	exact	symptom onset	OD	0.0955	7.00E-02	POS	NA	NA	exact	NA
1	Adams_UKCOV020_D566407	27	27	NA	NA	Exact	Symptom onset	0.9255	NA	NA	NA	Exact	NA	NA	OD	0.07	NA	S6 Table	IgM	Serum_Plasma	NA	NA	Severe_Critical	Diseased	ELISA	Spike	SARS-CoV-2	Human	UK? (Oxford University Hospitals NHS Foundation Trust)	Adams	2020	10.1101/2020.04.15.20066407	﻿﻿Authors state in MS: all cases ﻿positive for SARS-CoV-2 by RT-PCR from an upper respiratory tract (nose/throat) swab tested in accredited laboratories. Cases were classified following WHO criteria as critical (respiratory failure, septic shock, and/or multiple organ dysfunction/failure); severe (dyspnoea, respiratory frequency ≥30/minute, blood oxygen saturation ≤93%, PaO2/FiO2 ratio <300, and/…	KP	1	Adams_2020_66407	UKCOV020_D5	27	27	exact	symptom onset	OD	0.9255	7.00E-02	POS	NA	NA	exact	NA
1	Adams_UKCOV022_D566407	4	4	NA	NA	Exact	Symptom onset	0	NA	NA	NA	Exact	NA	NA	OD	0.07	NA	S6 Table	IgM	Serum_Plasma	NA	NA	Severe_Critical	Diseased	ELISA	Spike	SARS-CoV-2	Human	UK? (Oxford University Hospitals NHS Foundation Trust)	Adams	2020	10.1101/2020.04.15.20066407	﻿﻿Authors state in MS: all cases ﻿positive for SARS-CoV-2 by RT-PCR from an upper respiratory tract (nose/throat) swab tested in accredited laboratories. Cases were classified following WHO criteria as critical (respiratory failure, septic shock, and/or multiple organ dysfunction/failure); severe (dyspnoea, respiratory frequency ≥30/minute, blood oxygen saturation ≤93%, PaO2/FiO2 ratio <300, and/…	KP	1	Adams_2020_66407	UKCOV022_D5	4	4	exact	symptom onset	OD	0	7.00E-02	NEG	NA	NA	exact	NA
1	Adams_UKCOV024_D566407	10	10	NA	NA	Exact	Symptom onset	0.44	NA	NA	NA	Exact	NA	NA	OD	0.07	NA	S6 Table	IgM	Serum_Plasma	NA	NA	Severe_Critical	Diseased	ELISA	Spike	SARS-CoV-2	Human	UK? (Oxford University Hospitals NHS Foundation Trust)	Adams	2020	10.1101/2020.04.15.20066407	﻿﻿Authors state in MS: all cases ﻿positive for SARS-CoV-2 by RT-PCR from an upper respiratory tract (nose/throat) swab tested in accredited laboratories. Cases were classified following WHO criteria as critical (respiratory failure, septic shock, and/or multiple organ dysfunction/failure); severe (dyspnoea, respiratory frequency ≥30/minute, blood oxygen saturation ≤93%, PaO2/FiO2 ratio <300, and/…	KP	1	Adams_2020_66407	UKCOV024_D5	10	10	exact	symptom onset	OD	0.44	7.00E-02	POS	NA	NA	exact	NA
1	Adams_UKCOV027_D566407	15	15	NA	NA	Exact	Symptom onset	0.1555	NA	NA	NA	Exact	NA	NA	OD	0.07	NA	S6 Table	IgM	Serum_Plasma	NA	NA	Severe_Critical	Diseased	ELISA	Spike	SARS-CoV-2	Human	UK? (Oxford University Hospitals NHS Foundation Trust)	Adams	2020	10.1101/2020.04.15.20066407	﻿﻿Authors state in MS: all cases ﻿positive for SARS-CoV-2 by RT-PCR from an upper respiratory tract (nose/throat) swab tested in accredited laboratories. Cases were classified following WHO criteria as critical (respiratory failure, septic shock, and/or multiple organ dysfunction/failure); severe (dyspnoea, respiratory frequency ≥30/minute, blood oxygen saturation ≤93%, PaO2/FiO2 ratio <300, and/…	KP	1	Adams_2020_66407	UKCOV027_D5	15	15	exact	symptom onset	OD	0.1555	7.00E-02	POS	NA	NA	exact	NA
1	Adams_UKCOV028_D366407	8	8	NA	NA	Exact	Symptom onset	0.1255	NA	NA	NA	Exact	NA	NA	OD	0.07	NA	S6 Table	IgM	Serum_Plasma	NA	NA	Severe_Critical	Diseased	ELISA	Spike	SARS-CoV-2	Human	UK? (Oxford University Hospitals NHS Foundation Trust)	Adams	2020	10.1101/2020.04.15.20066407	﻿﻿Authors state in MS: all cases ﻿positive for SARS-CoV-2 by RT-PCR from an upper respiratory tract (nose/throat) swab tested in accredited laboratories. Cases were classified following WHO criteria as critical (respiratory failure, septic shock, and/or multiple organ dysfunction/failure); severe (dyspnoea, respiratory frequency ≥30/minute, blood oxygen saturation ≤93%, PaO2/FiO2 ratio <300, and/…	KP	1	Adams_2020_66407	UKCOV028_D3	8	8	exact	symptom onset	OD	0.1255	7.00E-02	POS	NA	NA	exact	NA
1	Adams_UKCOV029_D566407	7	7	NA	NA	Exact	Symptom onset	0	NA	NA	NA	Exact	NA	NA	OD	0.07	NA	S6 Table	IgM	Serum_Plasma	NA	NA	Severe_Critical	Diseased	ELISA	Spike	SARS-CoV-2	Human	UK? (Oxford University Hospitals NHS Foundation Trust)	Adams	2020	10.1101/2020.04.15.20066407	﻿﻿Authors state in MS: all cases ﻿positive for SARS-CoV-2 by RT-PCR from an upper respiratory tract (nose/throat) swab tested in accredited laboratories. Cases were classified following WHO criteria as critical (respiratory failure, septic shock, and/or multiple organ dysfunction/failure); severe (dyspnoea, respiratory frequency ≥30/minute, blood oxygen saturation ≤93%, PaO2/FiO2 ratio <300, and/…	KP	1	Adams_2020_66407	UKCOV029_D5	7	7	exact	symptom onset	OD	0	7.00E-02	NEG	NA	NA	exact	NA
1	Adams_UKCOV031_D366407	10	10	NA	NA	Exact	Symptom onset	1.1295	NA	NA	NA	Exact	NA	NA	OD	0.07	NA	S6 Table	IgM	Serum_Plasma	NA	NA	Mild_Moderate	Diseased	ELISA	Spike	SARS-CoV-2	Human	UK? (Oxford University Hospitals NHS Foundation Trust)	Adams	2020	10.1101/2020.04.15.20066407	﻿﻿Authors state in MS: all cases ﻿positive for SARS-CoV-2 by RT-PCR from an upper respiratory tract (nose/throat) swab tested in accredited laboratories. Cases were classified following WHO criteria as critical (respiratory failure, septic shock, and/or multiple organ dysfunction/failure); severe (dyspnoea, respiratory frequency ≥30/minute, blood oxygen saturation ≤93%, PaO2/FiO2 ratio <300, and/…	KP	1	Adams_2020_66407	UKCOV031_D3	10	10	exact	symptom onset	OD	1.1295	7.00E-02	POS	NA	NA	exact	NA
1	Adams_UKCOV033_D366407	10	10	NA	NA	Exact	Symptom onset	0.7985	NA	NA	NA	Exact	NA	NA	OD	0.07	NA	S6 Table	IgM	Serum_Plasma	NA	NA	Severe_Critical	Diseased	ELISA	Spike	SARS-CoV-2	Human	UK? (Oxford University Hospitals NHS Foundation Trust)	Adams	2020	10.1101/2020.04.15.20066407	﻿﻿Authors state in MS: all cases ﻿positive for SARS-CoV-2 by RT-PCR from an upper respiratory tract (nose/throat) swab tested in accredited laboratories. Cases were classified following WHO criteria as critical (respiratory failure, septic shock, and/or multiple organ dysfunction/failure); severe (dyspnoea, respiratory frequency ≥30/minute, blood oxygen saturation ≤93%, PaO2/FiO2 ratio <300, and/…	KP	1	Adams_2020_66407	UKCOV033_D3	10	10	exact	symptom onset	OD	0.7985	7.00E-02	POS	NA	NA	exact	NA
1	Adams_UKCOV035_D566407	8	8	NA	NA	Exact	Symptom onset	0.7105	NA	NA	NA	Exact	NA	NA	OD	0.07	NA	S6 Table	IgM	Serum_Plasma	NA	NA	Severe_Critical	Diseased	ELISA	Spike	SARS-CoV-2	Human	UK? (Oxford University Hospitals NHS Foundation Trust)	Adams	2020	10.1101/2020.04.15.20066407	﻿﻿Authors state in MS: all cases ﻿positive for SARS-CoV-2 by RT-PCR from an upper respiratory tract (nose/throat) swab tested in accredited laboratories. Cases were classified following WHO criteria as critical (respiratory failure, septic shock, and/or multiple organ dysfunction/failure); severe (dyspnoea, respiratory frequency ≥30/minute, blood oxygen saturation ≤93%, PaO2/FiO2 ratio <300, and/…	KP	1	Adams_2020_66407	UKCOV035_D5	8	8	exact	symptom onset	OD	0.7105	7.00E-02	POS	NA	NA	exact	NA
1	Adams_COV19-00166407	60	60	NA	NA	Exact	Symptom onset	1.105	NA	NA	NA	Exact	NA	NA	OD	0.4	NA	S6 Table	IgG	Serum_Plasma	NA	NA	Mild_Moderate	Diseased	ELISA	Spike	SARS-CoV-2	Human	UK? (Public Health England (contact tracing))	Adams	2020	10.1101/2020.04.15.20066407	﻿﻿Authors state in MS: all cases ﻿positive for SARS-CoV-2 by RT-PCR from an upper respiratory tract (nose/throat) swab tested in accredited laboratories. Cases were classified following WHO criteria as critical (respiratory failure, septic shock, and/or multiple organ dysfunction/failure); severe (dyspnoea, respiratory frequency ≥30/minute, blood oxygen saturation ≤93%, PaO2/FiO2 ratio <300, and/…	KP	1	Adams_2020_66407	COV19-001	60	60	exact	symptom onset	OD	1.105	0.4	POS	NA	NA	exact	NA
1	Adams_COV19-00266407	56	56	NA	NA	Exact	Symptom onset	2.249	NA	NA	NA	Exact	NA	NA	OD	0.4	NA	S6 Table	IgG	Serum_Plasma	NA	NA	Mild_Moderate	Diseased	ELISA	Spike	SARS-CoV-2	Human	UK? (Public Health England (contact tracing))	Adams	2020	10.1101/2020.04.15.20066407	﻿﻿Authors state in MS: all cases ﻿positive for SARS-CoV-2 by RT-PCR from an upper respiratory tract (nose/throat) swab tested in accredited laboratories. Cases were classified following WHO criteria as critical (respiratory failure, septic shock, and/or multiple organ dysfunction/failure); severe (dyspnoea, respiratory frequency ≥30/minute, blood oxygen saturation ≤93%, PaO2/FiO2 ratio <300, and/…	KP	1	Adams_2020_66407	COV19-002	56	56	exact	symptom onset	OD	2.249	0.4	POS	NA	NA	exact	NA
1	Adams_COV19-00366407	55	55	NA	NA	Exact	Symptom onset	2.334	NA	NA	NA	Exact	NA	NA	OD	0.4	NA	S6 Table	IgG	Serum_Plasma	NA	NA	Mild_Moderate	Diseased	ELISA	Spike	SARS-CoV-2	Human	UK? (Public Health England (contact tracing))	Adams	2020	10.1101/2020.04.15.20066407	﻿﻿Authors state in MS: all cases ﻿positive for SARS-CoV-2 by RT-PCR from an upper respiratory tract (nose/throat) swab tested in accredited laboratories. Cases were classified following WHO criteria as critical (respiratory failure, septic shock, and/or multiple organ dysfunction/failure); severe (dyspnoea, respiratory frequency ≥30/minute, blood oxygen saturation ≤93%, PaO2/FiO2 ratio <300, and/…	KP	1	Adams_2020_66407	COV19-003	55	55	exact	symptom onset	OD	2.334	0.4	POS	NA	NA	exact	NA
1	Adams_COV19-00466407	54	54	NA	NA	Exact	Symptom onset	3.264	NA	NA	NA	Exact	NA	NA	OD	0.4	NA	S6 Table	IgG	Serum_Plasma	NA	NA	Mild_Moderate	Diseased	ELISA	Spike	SARS-CoV-2	Human	UK? (Public Health England (contact tracing))	Adams	2020	10.1101/2020.04.15.20066407	﻿﻿Authors state in MS: all cases ﻿positive for SARS-CoV-2 by RT-PCR from an upper respiratory tract (nose/throat) swab tested in accredited laboratories. Cases were classified following WHO criteria as critical (respiratory failure, septic shock, and/or multiple organ dysfunction/failure); severe (dyspnoea, respiratory frequency ≥30/minute, blood oxygen saturation ≤93%, PaO2/FiO2 ratio <300, and/…	KP	1	Adams_2020_66407	COV19-004	54	54	exact	symptom onset	OD	3.264	0.4	POS	NA	NA	exact	NA
1	Adams_COV19-00566407	58	58	NA	NA	Exact	Symptom onset	1.017	NA	NA	NA	Exact	NA	NA	OD	0.4	NA	S6 Table	IgG	Serum_Plasma	NA	NA	Asymptomatic	Asymptomatic	ELISA	Spike	SARS-CoV-2	Human	UK? (Public Health England (contact tracing))	Adams	2020	10.1101/2020.04.15.20066407	﻿﻿Authors state in MS: all cases ﻿positive for SARS-CoV-2 by RT-PCR from an upper respiratory tract (nose/throat) swab tested in accredited laboratories. Cases were classified following WHO criteria as critical (respiratory failure, septic shock, and/or multiple organ dysfunction/failure); severe (dyspnoea, respiratory frequency ≥30/minute, blood oxygen saturation ≤93%, PaO2/FiO2 ratio <300, and/…	KP	1	Adams_2020_66407	COV19-005	58	58	exact	symptom onset	OD	1.017	0.4	POS	NA	NA	exact	NA
1	Adams_COV19-00666407	58	58	NA	NA	Exact	Symptom onset	3.289	NA	NA	NA	Exact	NA	NA	OD	0.4	NA	S6 Table	IgG	Serum_Plasma	NA	NA	Mild_Moderate	Diseased	ELISA	Spike	SARS-CoV-2	Human	UK? (Public Health England (contact tracing))	Adams	2020	10.1101/2020.04.15.20066407	﻿﻿Authors state in MS: all cases ﻿positive for SARS-CoV-2 by RT-PCR from an upper respiratory tract (nose/throat) swab tested in accredited laboratories. Cases were classified following WHO criteria as critical (respiratory failure, septic shock, and/or multiple organ dysfunction/failure); severe (dyspnoea, respiratory frequency ≥30/minute, blood oxygen saturation ≤93%, PaO2/FiO2 ratio <300, and/…	KP	1	Adams_2020_66407	COV19-006	58	58	exact	symptom onset	OD	3.289	0.4	POS	NA	NA	exact	NA
1	Adams_COV19-00766407	62	62	NA	NA	Exact	Symptom onset	2.1025	NA	NA	NA	Exact	NA	NA	OD	0.4	NA	S6 Table	IgG	Serum_Plasma	NA	NA	Mild_Moderate	Diseased	ELISA	Spike	SARS-CoV-2	Human	UK? (Public Health England (contact tracing))	Adams	2020	10.1101/2020.04.15.20066407	﻿﻿Authors state in MS: all cases ﻿positive for SARS-CoV-2 by RT-PCR from an upper respiratory tract (nose/throat) swab tested in accredited laboratories. Cases were classified following WHO criteria as critical (respiratory failure, septic shock, and/or multiple organ dysfunction/failure); severe (dyspnoea, respiratory frequency ≥30/minute, blood oxygen saturation ≤93%, PaO2/FiO2 ratio <300, and/…	KP	1	Adams_2020_66407	COV19-007	62	62	exact	symptom onset	OD	2.1025	0.4	POS	NA	NA	exact	NA
1	Adams_COV19-00866407	53	53	NA	NA	Exact	Symptom onset	3.4485	NA	NA	NA	Exact	NA	NA	OD	0.4	NA	S6 Table	IgG	Serum_Plasma	NA	NA	Mild_Moderate	Diseased	ELISA	Spike	SARS-CoV-2	Human	UK? (Public Health England (contact tracing))	Adams	2020	10.1101/2020.04.15.20066407	﻿﻿Authors state in MS: all cases ﻿positive for SARS-CoV-2 by RT-PCR from an upper respiratory tract (nose/throat) swab tested in accredited laboratories. Cases were classified following WHO criteria as critical (respiratory failure, septic shock, and/or multiple organ dysfunction/failure); severe (dyspnoea, respiratory frequency ≥30/minute, blood oxygen saturation ≤93%, PaO2/FiO2 ratio <300, and/…	KP	1	Adams_2020_66407	COV19-008	53	53	exact	symptom onset	OD	3.4485	0.4	POS	NA	NA	exact	NA
1	Adams_COV19-00966407	57	57	NA	NA	Exact	Symptom onset	3.3065	NA	NA	NA	Exact	NA	NA	OD	0.4	NA	S6 Table	IgG	Serum_Plasma	NA	NA	Mild_Moderate	Diseased	ELISA	Spike	SARS-CoV-2	Human	UK? (Public Health England (contact tracing))	Adams	2020	10.1101/2020.04.15.20066407	﻿﻿Authors state in MS: all cases ﻿positive for SARS-CoV-2 by RT-PCR from an upper respiratory tract (nose/throat) swab tested in accredited laboratories. Cases were classified following WHO criteria as critical (respiratory failure, septic shock, and/or multiple organ dysfunction/failure); severe (dyspnoea, respiratory frequency ≥30/minute, blood oxygen saturation ≤93%, PaO2/FiO2 ratio <300, and/…	KP	1	Adams_2020_66407	COV19-009	57	57	exact	symptom onset	OD	3.3065	0.4	POS	NA	NA	exact	NA
1	Adams_COV19-01066407	40	40	NA	NA	Exact	Symptom onset	3.359	NA	NA	NA	Exact	NA	NA	OD	0.4	NA	S6 Table	IgG	Serum_Plasma	NA	NA	Mild_Moderate	Diseased	ELISA	Spike	SARS-CoV-2	Human	UK? (Public Health England (contact tracing))	Adams	2020	10.1101/2020.04.15.20066407	﻿﻿Authors state in MS: all cases ﻿positive for SARS-CoV-2 by RT-PCR from an upper respiratory tract (nose/throat) swab tested in accredited laboratories. Cases were classified following WHO criteria as critical (respiratory failure, septic shock, and/or multiple organ dysfunction/failure); severe (dyspnoea, respiratory frequency ≥30/minute, blood oxygen saturation ≤93%, PaO2/FiO2 ratio <300, and/…	KP	1	Adams_2020_66407	COV19-010	40	40	exact	symptom onset	OD	3.359	0.4	POS	NA	NA	exact	NA
1	Adams_COV19-01166407	41	41	NA	NA	Exact	Symptom onset	3.0475	NA	NA	NA	Exact	NA	NA	OD	0.4	NA	S6 Table	IgG	Serum_Plasma	NA	NA	Mild_Moderate	Diseased	ELISA	Spike	SARS-CoV-2	Human	UK? (Public Health England (contact tracing))	Adams	2020	10.1101/2020.04.15.20066407	﻿﻿Authors state in MS: all cases ﻿positive for SARS-CoV-2 by RT-PCR from an upper respiratory tract (nose/throat) swab tested in accredited laboratories. Cases were classified following WHO criteria as critical (respiratory failure, septic shock, and/or multiple organ dysfunction/failure); severe (dyspnoea, respiratory frequency ≥30/minute, blood oxygen saturation ≤93%, PaO2/FiO2 ratio <300, and/…	KP	1	Adams_2020_66407	COV19-011	41	41	exact	symptom onset	OD	3.0475	0.4	POS	NA	NA	exact	NA
1	Adams_COV19-01266407	41	41	NA	NA	Exact	Symptom onset	2.779	NA	NA	NA	Exact	NA	NA	OD	0.4	NA	S6 Table	IgG	Serum_Plasma	NA	NA	Mild_Moderate	Diseased	ELISA	Spike	SARS-CoV-2	Human	UK? (Public Health England (contact tracing))	Adams	2020	10.1101/2020.04.15.20066407	﻿﻿Authors state in MS: all cases ﻿positive for SARS-CoV-2 by RT-PCR from an upper respiratory tract (nose/throat) swab tested in accredited laboratories. Cases were classified following WHO criteria as critical (respiratory failure, septic shock, and/or multiple organ dysfunction/failure); severe (dyspnoea, respiratory frequency ≥30/minute, blood oxygen saturation ≤93%, PaO2/FiO2 ratio <300, and/…	KP	1	Adams_2020_66407	COV19-012	41	41	exact	symptom onset	OD	2.779	0.4	POS	NA	NA	exact	NA
1	Adams_COV19-01366407	42	42	NA	NA	Exact	Symptom onset	3.1975	NA	NA	NA	Exact	NA	NA	OD	0.4	NA	S6 Table	IgG	Serum_Plasma	NA	NA	Mild_Moderate	Diseased	ELISA	Spike	SARS-CoV-2	Human	UK? (Public Health England (contact tracing))	Adams	2020	10.1101/2020.04.15.20066407	﻿﻿Authors state in MS: all cases ﻿positive for SARS-CoV-2 by RT-PCR from an upper respiratory tract (nose/throat) swab tested in accredited laboratories. Cases were classified following WHO criteria as critical (respiratory failure, septic shock, and/or multiple organ dysfunction/failure); severe (dyspnoea, respiratory frequency ≥30/minute, blood oxygen saturation ≤93%, PaO2/FiO2 ratio <300, and/…	KP	1	Adams_2020_66407	COV19-013	42	42	exact	symptom onset	OD	3.1975	0.4	POS	NA	NA	exact	NA
1	Adams_COV19-01466407	41	41	NA	NA	Exact	Symptom onset	2.1255	NA	NA	NA	Exact	NA	NA	OD	0.4	NA	S6 Table	IgG	Serum_Plasma	NA	NA	Mild_Moderate	Diseased	ELISA	Spike	SARS-CoV-2	Human	UK? (Public Health England (contact tracing))	Adams	2020	10.1101/2020.04.15.20066407	﻿﻿Authors state in MS: all cases ﻿positive for SARS-CoV-2 by RT-PCR from an upper respiratory tract (nose/throat) swab tested in accredited laboratories. Cases were classified following WHO criteria as critical (respiratory failure, septic shock, and/or multiple organ dysfunction/failure); severe (dyspnoea, respiratory frequency ≥30/minute, blood oxygen saturation ≤93%, PaO2/FiO2 ratio <300, and/…	KP	1	Adams_2020_66407	COV19-014	41	41	exact	symptom onset	OD	2.1255	0.4	POS	NA	NA	exact	NA
1	Adams_COV19-01566407	42	42	NA	NA	Exact	Symptom onset	3.432	NA	NA	NA	Exact	NA	NA	OD	0.4	NA	S6 Table	IgG	Serum_Plasma	NA	NA	Mild_Moderate	Diseased	ELISA	Spike	SARS-CoV-2	Human	UK? (Public Health England (contact tracing))	Adams	2020	10.1101/2020.04.15.20066407	﻿﻿Authors state in MS: all cases ﻿positive for SARS-CoV-2 by RT-PCR from an upper respiratory tract (nose/throat) swab tested in accredited laboratories. Cases were classified following WHO criteria as critical (respiratory failure, septic shock, and/or multiple organ dysfunction/failure); severe (dyspnoea, respiratory frequency ≥30/minute, blood oxygen saturation ≤93%, PaO2/FiO2 ratio <300, and/…	KP	1	Adams_2020_66407	COV19-015	42	42	exact	symptom onset	OD	3.432	0.4	POS	NA	NA	exact	NA
1	Adams_COV19-01866407	36	36	NA	NA	Exact	Symptom onset	3.3205	NA	NA	NA	Exact	NA	NA	OD	0.4	NA	S6 Table	IgG	Serum_Plasma	NA	NA	Mild_Moderate	Diseased	ELISA	Spike	SARS-CoV-2	Human	UK? (Public Health England (contact tracing))	Adams	2020	10.1101/2020.04.15.20066407	﻿﻿Authors state in MS: all cases ﻿positive for SARS-CoV-2 by RT-PCR from an upper respiratory tract (nose/throat) swab tested in accredited laboratories. Cases were classified following WHO criteria as critical (respiratory failure, septic shock, and/or multiple organ dysfunction/failure); severe (dyspnoea, respiratory frequency ≥30/minute, blood oxygen saturation ≤93%, PaO2/FiO2 ratio <300, and/…	KP	1	Adams_2020_66407	COV19-018	36	36	exact	symptom onset	OD	3.3205	0.4	POS	NA	NA	exact	NA
1	Adams_COV19-01966407	39	39	NA	NA	Exact	Symptom onset	3.3525	NA	NA	NA	Exact	NA	NA	OD	0.4	NA	S6 Table	IgG	Serum_Plasma	NA	NA	Mild_Moderate	Diseased	ELISA	Spike	SARS-CoV-2	Human	UK? (Public Health England (contact tracing))	Adams	2020	10.1101/2020.04.15.20066407	﻿﻿Authors state in MS: all cases ﻿positive for SARS-CoV-2 by RT-PCR from an upper respiratory tract (nose/throat) swab tested in accredited laboratories. Cases were classified following WHO criteria as critical (respiratory failure, septic shock, and/or multiple organ dysfunction/failure); severe (dyspnoea, respiratory frequency ≥30/minute, blood oxygen saturation ≤93%, PaO2/FiO2 ratio <300, and/…	KP	1	Adams_2020_66407	COV19-019	39	39	exact	symptom onset	OD	3.3525	0.4	POS	NA	NA	exact	NA
1	Adams_COV19-02066407	31	31	NA	NA	Exact	Symptom onset	3.3525	NA	NA	NA	Exact	NA	NA	OD	0.4	NA	S6 Table	IgG	Serum_Plasma	NA	NA	Mild_Moderate	Diseased	ELISA	Spike	SARS-CoV-2	Human	UK? (Public Health England (contact tracing))	Adams	2020	10.1101/2020.04.15.20066407	﻿﻿Authors state in MS: all cases ﻿positive for SARS-CoV-2 by RT-PCR from an upper respiratory tract (nose/throat) swab tested in accredited laboratories. Cases were classified following WHO criteria as critical (respiratory failure, septic shock, and/or multiple organ dysfunction/failure); severe (dyspnoea, respiratory frequency ≥30/minute, blood oxygen saturation ≤93%, PaO2/FiO2 ratio <300, and/…	KP	1	Adams_2020_66407	COV19-020	31	31	exact	symptom onset	OD	3.3525	0.4	POS	NA	NA	exact	NA
1	Adams_HCW04_D1466407	12	12	NA	NA	Exact	Symptom onset	1.303	NA	NA	NA	Exact	NA	NA	OD	0.4	NA	S6 Table	IgG	Serum_Plasma	NA	NA	Mild_Moderate	Diseased	ELISA	Spike	SARS-CoV-2	Human	UK? (Healthcare Workers (UK?))	Adams	2020	10.1101/2020.04.15.20066407	﻿﻿Authors state in MS: all cases ﻿positive for SARS-CoV-2 by RT-PCR from an upper respiratory tract (nose/throat) swab tested in accredited laboratories. Cases were classified following WHO criteria as critical (respiratory failure, septic shock, and/or multiple organ dysfunction/failure); severe (dyspnoea, respiratory frequency ≥30/minute, blood oxygen saturation ≤93%, PaO2/FiO2 ratio <300, and/…	KP	1	Adams_2020_66407	HCW04_D14	12	12	exact	symptom onset	OD	1.303	0.4	POS	NA	NA	exact	NA
1	Adams_HCW05_D1466407	10	10	NA	NA	Exact	Symptom onset	3.2915	NA	NA	NA	Exact	NA	NA	OD	0.4	NA	S6 Table	IgG	Serum_Plasma	NA	NA	Mild_Moderate	Diseased	ELISA	Spike	SARS-CoV-2	Human	UK? (Healthcare Workers (UK?))	Adams	2020	10.1101/2020.04.15.20066407	﻿﻿Authors state in MS: all cases ﻿positive for SARS-CoV-2 by RT-PCR from an upper respiratory tract (nose/throat) swab tested in accredited laboratories. Cases were classified following WHO criteria as critical (respiratory failure, septic shock, and/or multiple organ dysfunction/failure); severe (dyspnoea, respiratory frequency ≥30/minute, blood oxygen saturation ≤93%, PaO2/FiO2 ratio <300, and/…	KP	1	Adams_2020_66407	HCW05_D14	10	10	exact	symptom onset	OD	3.2915	0.4	POS	NA	NA	exact	NA
1	Adams_HCW06_D1466407	19	19	NA	NA	Exact	Symptom onset	3.3395	NA	NA	NA	Exact	NA	NA	OD	0.4	NA	S6 Table	IgG	Serum_Plasma	NA	NA	Mild_Moderate	Diseased	ELISA	Spike	SARS-CoV-2	Human	UK? (Healthcare Workers (UK?))	Adams	2020	10.1101/2020.04.15.20066407	﻿﻿Authors state in MS: all cases ﻿positive for SARS-CoV-2 by RT-PCR from an upper respiratory tract (nose/throat) swab tested in accredited laboratories. Cases were classified following WHO criteria as critical (respiratory failure, septic shock, and/or multiple organ dysfunction/failure); severe (dyspnoea, respiratory frequency ≥30/minute, blood oxygen saturation ≤93%, PaO2/FiO2 ratio <300, and/…	KP	1	Adams_2020_66407	HCW06_D14	19	19	exact	symptom onset	OD	3.3395	0.4	POS	NA	NA	exact	NA
1	Adams_HCW07_D1466407	8	8	NA	NA	Exact	Symptom onset	0	NA	NA	NA	Exact	NA	NA	OD	0.4	NA	S6 Table	IgG	Serum_Plasma	NA	NA	Mild_Moderate	Diseased	ELISA	Spike	SARS-CoV-2	Human	UK? (Healthcare Workers (UK?))	Adams	2020	10.1101/2020.04.15.20066407	﻿﻿Authors state in MS: all cases ﻿positive for SARS-CoV-2 by RT-PCR from an upper respiratory tract (nose/throat) swab tested in accredited laboratories. Cases were classified following WHO criteria as critical (respiratory failure, septic shock, and/or multiple organ dysfunction/failure); severe (dyspnoea, respiratory frequency ≥30/minute, blood oxygen saturation ≤93%, PaO2/FiO2 ratio <300, and/…	KP	1	Adams_2020_66407	HCW07_D14	8	8	exact	symptom onset	OD	0	0.4	NEG	NA	NA	exact	NA
1	Adams_HCW08_D1466407	18	18	NA	NA	Exact	Symptom onset	2.527	NA	NA	NA	Exact	NA	NA	OD	0.4	NA	S6 Table	IgG	Serum_Plasma	NA	NA	Mild_Moderate	Diseased	ELISA	Spike	SARS-CoV-2	Human	UK? (Healthcare Workers (UK?))	Adams	2020	10.1101/2020.04.15.20066407	﻿﻿Authors state in MS: all cases ﻿positive for SARS-CoV-2 by RT-PCR from an upper respiratory tract (nose/throat) swab tested in accredited laboratories. Cases were classified following WHO criteria as critical (respiratory failure, septic shock, and/or multiple organ dysfunction/failure); severe (dyspnoea, respiratory frequency ≥30/minute, blood oxygen saturation ≤93%, PaO2/FiO2 ratio <300, and/…	KP	1	Adams_2020_66407	HCW08_D14	18	18	exact	symptom onset	OD	2.527	0.4	POS	NA	NA	exact	NA
1	Adams_HCW09_D1466407	14	14	NA	NA	Exact	Symptom onset	3.2435	NA	NA	NA	Exact	NA	NA	OD	0.4	NA	S6 Table	IgG	Serum_Plasma	NA	NA	Mild_Moderate	Diseased	ELISA	Spike	SARS-CoV-2	Human	UK? (Healthcare Workers (UK?))	Adams	2020	10.1101/2020.04.15.20066407	﻿﻿Authors state in MS: all cases ﻿positive for SARS-CoV-2 by RT-PCR from an upper respiratory tract (nose/throat) swab tested in accredited laboratories. Cases were classified following WHO criteria as critical (respiratory failure, septic shock, and/or multiple organ dysfunction/failure); severe (dyspnoea, respiratory frequency ≥30/minute, blood oxygen saturation ≤93%, PaO2/FiO2 ratio <300, and/…	KP	1	Adams_2020_66407	HCW09_D14	14	14	exact	symptom onset	OD	3.2435	0.4	POS	NA	NA	exact	NA
1	Adams_UKCOV003_D366407	9	9	NA	NA	Exact	Symptom onset	2.95	NA	NA	NA	Exact	NA	NA	OD	0.4	NA	S6 Table	IgG	Serum_Plasma	NA	NA	Severe_Critical	Diseased	ELISA	Spike	SARS-CoV-2	Human	UK? (Oxford University Hospitals NHS Foundation Trust)	Adams	2020	10.1101/2020.04.15.20066407	﻿﻿Authors state in MS: all cases ﻿positive for SARS-CoV-2 by RT-PCR from an upper respiratory tract (nose/throat) swab tested in accredited laboratories. Cases were classified following WHO criteria as critical (respiratory failure, septic shock, and/or multiple organ dysfunction/failure); severe (dyspnoea, respiratory frequency ≥30/minute, blood oxygen saturation ≤93%, PaO2/FiO2 ratio <300, and/…	KP	1	Adams_2020_66407	UKCOV003_D3	9	9	exact	symptom onset	OD	2.95	0.4	POS	NA	NA	exact	NA
1	Adams_UKCOV005_D366407	12	12	NA	NA	Exact	Symptom onset	3.334	NA	NA	NA	Exact	NA	NA	OD	0.4	NA	S6 Table	IgG	Serum_Plasma	NA	NA	Severe_Critical	Diseased	ELISA	Spike	SARS-CoV-2	Human	UK? (Oxford University Hospitals NHS Foundation Trust)	Adams	2020	10.1101/2020.04.15.20066407	﻿﻿Authors state in MS: all cases ﻿positive for SARS-CoV-2 by RT-PCR from an upper respiratory tract (nose/throat) swab tested in accredited laboratories. Cases were classified following WHO criteria as critical (respiratory failure, septic shock, and/or multiple organ dysfunction/failure); severe (dyspnoea, respiratory frequency ≥30/minute, blood oxygen saturation ≤93%, PaO2/FiO2 ratio <300, and/…	KP	1	Adams_2020_66407	UKCOV005_D3	12	12	exact	symptom onset	OD	3.334	0.4	POS	NA	NA	exact	NA
1	Adams_UKCOV006_D566407	5	5	NA	NA	Exact	Symptom onset	0	NA	NA	NA	Exact	NA	NA	OD	0.4	NA	S6 Table	IgG	Serum_Plasma	NA	NA	Mild_Moderate	Diseased	ELISA	Spike	SARS-CoV-2	Human	UK? (Oxford University Hospitals NHS Foundation Trust)	Adams	2020	10.1101/2020.04.15.20066407	﻿﻿Authors state in MS: all cases ﻿positive for SARS-CoV-2 by RT-PCR from an upper respiratory tract (nose/throat) swab tested in accredited laboratories. Cases were classified following WHO criteria as critical (respiratory failure, septic shock, and/or multiple organ dysfunction/failure); severe (dyspnoea, respiratory frequency ≥30/minute, blood oxygen saturation ≤93%, PaO2/FiO2 ratio <300, and/…	KP	1	Adams_2020_66407	UKCOV006_D5	5	5	exact	symptom onset	OD	0	0.4	NEG	NA	NA	exact	NA
1	Adams_UKCOV007_D366407	6	6	NA	NA	Exact	Symptom onset	0	NA	NA	NA	Exact	NA	NA	OD	0.4	NA	S6 Table	IgG	Serum_Plasma	NA	NA	Severe_Critical	Diseased	ELISA	Spike	SARS-CoV-2	Human	UK? (Oxford University Hospitals NHS Foundation Trust)	Adams	2020	10.1101/2020.04.15.20066407	﻿﻿Authors state in MS: all cases ﻿positive for SARS-CoV-2 by RT-PCR from an upper respiratory tract (nose/throat) swab tested in accredited laboratories. Cases were classified following WHO criteria as critical (respiratory failure, septic shock, and/or multiple organ dysfunction/failure); severe (dyspnoea, respiratory frequency ≥30/minute, blood oxygen saturation ≤93%, PaO2/FiO2 ratio <300, and/…	KP	1	Adams_2020_66407	UKCOV007_D3	6	6	exact	symptom onset	OD	0	0.4	NEG	NA	NA	exact	NA
1	Adams_UKCOV017_D366407	9	9	NA	NA	Exact	Symptom onset	0	NA	NA	NA	Exact	NA	NA	OD	0.4	NA	S6 Table	IgG	Serum_Plasma	NA	NA	Severe_Critical	Diseased	ELISA	Spike	SARS-CoV-2	Human	UK? (Oxford University Hospitals NHS Foundation Trust)	Adams	2020	10.1101/2020.04.15.20066407	﻿﻿Authors state in MS: all cases ﻿positive for SARS-CoV-2 by RT-PCR from an upper respiratory tract (nose/throat) swab tested in accredited laboratories. Cases were classified following WHO criteria as critical (respiratory failure, septic shock, and/or multiple organ dysfunction/failure); severe (dyspnoea, respiratory frequency ≥30/minute, blood oxygen saturation ≤93%, PaO2/FiO2 ratio <300, and/…	KP	1	Adams_2020_66407	UKCOV017_D3	9	9	exact	symptom onset	OD	0	0.4	NEG	NA	NA	exact	NA
1	Adams_UKCOV018_D366407	11	11	NA	NA	Exact	Symptom onset	3.399	NA	NA	NA	Exact	NA	NA	OD	0.4	NA	S6 Table	IgG	Serum_Plasma	NA	NA	Mild_Moderate	Diseased	ELISA	Spike	SARS-CoV-2	Human	UK? (Oxford University Hospitals NHS Foundation Trust)	Adams	2020	10.1101/2020.04.15.20066407	﻿﻿Authors state in MS: all cases ﻿positive for SARS-CoV-2 by RT-PCR from an upper respiratory tract (nose/throat) swab tested in accredited laboratories. Cases were classified following WHO criteria as critical (respiratory failure, septic shock, and/or multiple organ dysfunction/failure); severe (dyspnoea, respiratory frequency ≥30/minute, blood oxygen saturation ≤93%, PaO2/FiO2 ratio <300, and/…	KP	1	Adams_2020_66407	UKCOV018_D3	11	11	exact	symptom onset	OD	3.399	0.4	POS	NA	NA	exact	NA
1	Adams_UKCOV019_D566407	16	16	NA	NA	Exact	Symptom onset	0.6185	NA	NA	NA	Exact	NA	NA	OD	0.4	NA	S6 Table	IgG	Serum_Plasma	NA	NA	Severe_Critical	Diseased	ELISA	Spike	SARS-CoV-2	Human	UK? (Oxford University Hospitals NHS Foundation Trust)	Adams	2020	10.1101/2020.04.15.20066407	﻿﻿Authors state in MS: all cases ﻿positive for SARS-CoV-2 by RT-PCR from an upper respiratory tract (nose/throat) swab tested in accredited laboratories. Cases were classified following WHO criteria as critical (respiratory failure, septic shock, and/or multiple organ dysfunction/failure); severe (dyspnoea, respiratory frequency ≥30/minute, blood oxygen saturation ≤93%, PaO2/FiO2 ratio <300, and/…	KP	1	Adams_2020_66407	UKCOV019_D5	16	16	exact	symptom onset	OD	0.6185	0.4	POS	NA	NA	exact	NA
1	Adams_UKCOV020_D566407	27	27	NA	NA	Exact	Symptom onset	3.451	NA	NA	NA	Exact	NA	NA	OD	0.4	NA	S6 Table	IgG	Serum_Plasma	NA	NA	Severe_Critical	Diseased	ELISA	Spike	SARS-CoV-2	Human	UK? (Oxford University Hospitals NHS Foundation Trust)	Adams	2020	10.1101/2020.04.15.20066407	﻿﻿Authors state in MS: all cases ﻿positive for SARS-CoV-2 by RT-PCR from an upper respiratory tract (nose/throat) swab tested in accredited laboratories. Cases were classified following WHO criteria as critical (respiratory failure, septic shock, and/or multiple organ dysfunction/failure); severe (dyspnoea, respiratory frequency ≥30/minute, blood oxygen saturation ≤93%, PaO2/FiO2 ratio <300, and/…	KP	1	Adams_2020_66407	UKCOV020_D5	27	27	exact	symptom onset	OD	3.451	0.4	POS	NA	NA	exact	NA
1	Adams_UKCOV022_D566407	4	4	NA	NA	Exact	Symptom onset	0	NA	NA	NA	Exact	NA	NA	OD	0.4	NA	S6 Table	IgG	Serum_Plasma	NA	NA	Severe_Critical	Diseased	ELISA	Spike	SARS-CoV-2	Human	UK? (Oxford University Hospitals NHS Foundation Trust)	Adams	2020	10.1101/2020.04.15.20066407	﻿﻿Authors state in MS: all cases ﻿positive for SARS-CoV-2 by RT-PCR from an upper respiratory tract (nose/throat) swab tested in accredited laboratories. Cases were classified following WHO criteria as critical (respiratory failure, septic shock, and/or multiple organ dysfunction/failure); severe (dyspnoea, respiratory frequency ≥30/minute, blood oxygen saturation ≤93%, PaO2/FiO2 ratio <300, and/…	KP	1	Adams_2020_66407	UKCOV022_D5	4	4	exact	symptom onset	OD	0	0.4	NEG	NA	NA	exact	NA
1	Adams_UKCOV024_D566407	10	10	NA	NA	Exact	Symptom onset	2.293	NA	NA	NA	Exact	NA	NA	OD	0.4	NA	S6 Table	IgG	Serum_Plasma	NA	NA	Severe_Critical	Diseased	ELISA	Spike	SARS-CoV-2	Human	UK? (Oxford University Hospitals NHS Foundation Trust)	Adams	2020	10.1101/2020.04.15.20066407	﻿﻿Authors state in MS: all cases ﻿positive for SARS-CoV-2 by RT-PCR from an upper respiratory tract (nose/throat) swab tested in accredited laboratories. Cases were classified following WHO criteria as critical (respiratory failure, septic shock, and/or multiple organ dysfunction/failure); severe (dyspnoea, respiratory frequency ≥30/minute, blood oxygen saturation ≤93%, PaO2/FiO2 ratio <300, and/…	KP	1	Adams_2020_66407	UKCOV024_D5	10	10	exact	symptom onset	OD	2.293	0.4	POS	NA	NA	exact	NA
1	Adams_UKCOV027_D566407	15	15	NA	NA	Exact	Symptom onset	3.112	NA	NA	NA	Exact	NA	NA	OD	0.4	NA	S6 Table	IgG	Serum_Plasma	NA	NA	Severe_Critical	Diseased	ELISA	Spike	SARS-CoV-2	Human	UK? (Oxford University Hospitals NHS Foundation Trust)	Adams	2020	10.1101/2020.04.15.20066407	﻿﻿Authors state in MS: all cases ﻿positive for SARS-CoV-2 by RT-PCR from an upper respiratory tract (nose/throat) swab tested in accredited laboratories. Cases were classified following WHO criteria as critical (respiratory failure, septic shock, and/or multiple organ dysfunction/failure); severe (dyspnoea, respiratory frequency ≥30/minute, blood oxygen saturation ≤93%, PaO2/FiO2 ratio <300, and/…	KP	1	Adams_2020_66407	UKCOV027_D5	15	15	exact	symptom onset	OD	3.112	0.4	POS	NA	NA	exact	NA
1	Adams_UKCOV028_D366407	8	8	NA	NA	Exact	Symptom onset	1.2815	NA	NA	NA	Exact	NA	NA	OD	0.4	NA	S6 Table	IgG	Serum_Plasma	NA	NA	Severe_Critical	Diseased	ELISA	Spike	SARS-CoV-2	Human	UK? (Oxford University Hospitals NHS Foundation Trust)	Adams	2020	10.1101/2020.04.15.20066407	﻿﻿Authors state in MS: all cases ﻿positive for SARS-CoV-2 by RT-PCR from an upper respiratory tract (nose/throat) swab tested in accredited laboratories. Cases were classified following WHO criteria as critical (respiratory failure, septic shock, and/or multiple organ dysfunction/failure); severe (dyspnoea, respiratory frequency ≥30/minute, blood oxygen saturation ≤93%, PaO2/FiO2 ratio <300, and/…	KP	1	Adams_2020_66407	UKCOV028_D3	8	8	exact	symptom onset	OD	1.2815	0.4	POS	NA	NA	exact	NA
1	Adams_UKCOV029_D566407	7	7	NA	NA	Exact	Symptom onset	0	NA	NA	NA	Exact	NA	NA	OD	0.4	NA	S6 Table	IgG	Serum_Plasma	NA	NA	Severe_Critical	Diseased	ELISA	Spike	SARS-CoV-2	Human	UK? (Oxford University Hospitals NHS Foundation Trust)	Adams	2020	10.1101/2020.04.15.20066407	﻿﻿Authors state in MS: all cases ﻿positive for SARS-CoV-2 by RT-PCR from an upper respiratory tract (nose/throat) swab tested in accredited laboratories. Cases were classified following WHO criteria as critical (respiratory failure, septic shock, and/or multiple organ dysfunction/failure); severe (dyspnoea, respiratory frequency ≥30/minute, blood oxygen saturation ≤93%, PaO2/FiO2 ratio <300, and/…	KP	1	Adams_2020_66407	UKCOV029_D5	7	7	exact	symptom onset	OD	0	0.4	NEG	NA	NA	exact	NA
1	Adams_UKCOV031_D366407	10	10	NA	NA	Exact	Symptom onset	2.673	NA	NA	NA	Exact	NA	NA	OD	0.4	NA	S6 Table	IgG	Serum_Plasma	NA	NA	Mild_Moderate	Diseased	ELISA	Spike	SARS-CoV-2	Human	UK? (Oxford University Hospitals NHS Foundation Trust)	Adams	2020	10.1101/2020.04.15.20066407	﻿﻿Authors state in MS: all cases ﻿positive for SARS-CoV-2 by RT-PCR from an upper respiratory tract (nose/throat) swab tested in accredited laboratories. Cases were classified following WHO criteria as critical (respiratory failure, septic shock, and/or multiple organ dysfunction/failure); severe (dyspnoea, respiratory frequency ≥30/minute, blood oxygen saturation ≤93%, PaO2/FiO2 ratio <300, and/…	KP	1	Adams_2020_66407	UKCOV031_D3	10	10	exact	symptom onset	OD	2.673	0.4	POS	NA	NA	exact	NA
1	Adams_UKCOV033_D366407	10	10	NA	NA	Exact	Symptom onset	3.4345	NA	NA	NA	Exact	NA	NA	OD	0.4	NA	S6 Table	IgG	Serum_Plasma	NA	NA	Severe_Critical	Diseased	ELISA	Spike	SARS-CoV-2	Human	UK? (Oxford University Hospitals NHS Foundation Trust)	Adams	2020	10.1101/2020.04.15.20066407	﻿﻿Authors state in MS: all cases ﻿positive for SARS-CoV-2 by RT-PCR from an upper respiratory tract (nose/throat) swab tested in accredited laboratories. Cases were classified following WHO criteria as critical (respiratory failure, septic shock, and/or multiple organ dysfunction/failure); severe (dyspnoea, respiratory frequency ≥30/minute, blood oxygen saturation ≤93%, PaO2/FiO2 ratio <300, and/…	KP	1	Adams_2020_66407	UKCOV033_D3	10	10	exact	symptom onset	OD	3.4345	0.4	POS	NA	NA	exact	NA
1	Adams_UKCOV035_D566407	8	8	NA	NA	Exact	Symptom onset	3.426	NA	NA	NA	Exact	NA	NA	OD	0.4	NA	S6 Table	IgG	Serum_Plasma	NA	NA	Severe_Critical	Diseased	ELISA	Spike	SARS-CoV-2	Human	UK? (Oxford University Hospitals NHS Foundation Trust)	Adams	2020	10.1101/2020.04.15.20066407	﻿﻿Authors state in MS: all cases ﻿positive for SARS-CoV-2 by RT-PCR from an upper respiratory tract (nose/throat) swab tested in accredited laboratories. Cases were classified following WHO criteria as critical (respiratory failure, septic shock, and/or multiple organ dysfunction/failure); severe (dyspnoea, respiratory frequency ≥30/minute, blood oxygen saturation ≤93%, PaO2/FiO2 ratio <300, and/…	KP	1	Adams_2020_66407	UKCOV035_D5	8	8	exact	symptom onset	OD	3.426	0.4	POS	NA	NA	exact	NA
1	Zou_PatientZ00231	7	7	NA	NA	Exact	Exposure	NA	NA	NA	NA	Exact	NA	NA	Ct	NA	NA	Main text	Virus	Upper_respiratory	NA	NA	Asymptomatic	Asymptomatic	RTPCR	N and ORF1b	SARS-CoV-2	Human	Zhuhai	Zou	2020	﻿10.1056/NEJMc2000231	Symptom descriptions in appendix	BB	1	Zou_2020_00231	PatientZ	7	7	Exact	Exposure	Ct	NA	NA	POS	NA	NA	Exact	NA
1	Zou_PatientZ00231	10	10	NA	NA	Exact	Exposure	NA	NA	NA	NA	Exact	NA	NA	Ct	NA	NA	Main text	Virus	Upper_respiratory	NA	NA	Asymptomatic	Asymptomatic	RTPCR	N and ORF1b	SARS-CoV-2	Human	Zhuhai	Zou	2020	﻿10.1056/NEJMc2000231	Symptom descriptions in appendix	BB	1	Zou_2020_00231	PatientZ	10	10	Exact	Exposure	Ct	NA	NA	POS	NA	NA	Exact	NA
1	Zou_PatientZ00231	11	11	NA	NA	Exact	Exposure	NA	NA	NA	NA	Exact	NA	NA	Ct	NA	NA	Main text	Virus	Upper_respiratory	NA	NA	Asymptomatic	Asymptomatic	RTPCR	N and ORF1b	SARS-CoV-2	Human	Zhuhai	Zou	2020	﻿10.1056/NEJMc2000231	Symptom descriptions in appendix	BB	1	Zou_2020_00231	PatientZ	11	11	Exact	Exposure	Ct	NA	NA	POS	NA	NA	Exact	NA
1	Zou_PatientZ00231	7	7	NA	NA	Exact	Exposure	NA	NA	NA	NA	Exact	NA	NA	Ct	NA	NA	Main text	Virus	Upper_respiratory	NA	NA	Asymptomatic	Asymptomatic	RTPCR	N and ORF1b	SARS-CoV-2	Human	Zhuhai	Zou	2020	﻿10.1056/NEJMc2000231	Symptom descriptions in appendix	BB	1	Zou_2020_00231	PatientZ	7	7	Exact	Exposure	Ct	NA	NA	POS	NA	NA	Exact	NA
1	Zou_PatientZ00231	10	10	NA	NA	Exact	Exposure	NA	NA	NA	NA	Exact	NA	NA	Ct	NA	NA	Main text	Virus	Upper_respiratory	NA	NA	Asymptomatic	Asymptomatic	RTPCR	N and ORF1b	SARS-CoV-2	Human	Zhuhai	Zou	2020	﻿10.1056/NEJMc2000231	Symptom descriptions in appendix	BB	1	Zou_2020_00231	PatientZ	10	10	Exact	Exposure	Ct	NA	NA	POS	NA	NA	Exact	NA
1	Zou_PatientZ00231	11	11	NA	NA	Exact	Exposure	NA	NA	NA	NA	Exact	NA	NA	Ct	NA	NA	Main text	Virus	Upper_respiratory	NA	NA	Asymptomatic	Asymptomatic	RTPCR	N and ORF1b	SARS-CoV-2	Human	Zhuhai	Zou	2020	﻿10.1056/NEJMc2000231	Symptom descriptions in appendix	BB	1	Zou_2020_00231	PatientZ	11	11	Exact	Exposure	Ct	NA	NA	POS	NA	NA	Exact	NA
1	Zou_PatientB00231	3	3	NA	NA	Exact	Exposure	4.2188758248682	NA	NA	NA	Visual	NA	NA	Ct	40	NA	Figure 1	Virus	Upper_respiratory	NA	NA	Mild_Moderate	Diseased	RTPCR	N and ORF1b	SARS-CoV-2	Human	Zhuhai	Zou	2020	﻿10.1056/NEJMc2000231	Symptom descriptions in appendix	BB	1	Zou_2020_00231	PatientB	3	3	Exact	Exposure	Ct	25	40	POS	NA	NA	Visual	NA
1	Zou_PatientC00231	4	4	NA	NA	Exact	Exposure	4.61091791264422	NA	NA	NA	Visual	NA	NA	Ct	40	NA	Figure 1	Virus	Upper_respiratory	NA	NA	Mild_Moderate	Diseased	RTPCR	N and ORF1b	SARS-CoV-2	Human	Zhuhai	Zou	2020	﻿10.1056/NEJMc2000231	Symptom descriptions in appendix	BB	1	Zou_2020_00231	PatientC	4	4	Exact	Exposure	Ct	37	40	POS	NA	NA	Visual	NA
1	Zou_PatientC00231	5	5	NA	NA	Exact	Exposure	4.25809653802148	NA	NA	NA	Visual	NA	NA	Ct	40	NA	Figure 1	Virus	Upper_respiratory	NA	NA	Mild_Moderate	Diseased	RTPCR	N and ORF1b	SARS-CoV-2	Human	Zhuhai	Zou	2020	﻿10.1056/NEJMc2000231	Symptom descriptions in appendix	BB	1	Zou_2020_00231	PatientC	5	5	Exact	Exposure	Ct	26	40	POS	NA	NA	Visual	NA
1	Zou_PatientC00231	8	8	NA	NA	Exact	Exposure	4.40119738166216	NA	NA	NA	Visual	NA	NA	Ct	40	NA	Figure 1	Virus	Upper_respiratory	NA	NA	Mild_Moderate	Diseased	RTPCR	N and ORF1b	SARS-CoV-2	Human	Zhuhai	Zou	2020	﻿10.1056/NEJMc2000231	Symptom descriptions in appendix	BB	1	Zou_2020_00231	PatientC	8	8	Exact	Exposure	Ct	30	40	POS	NA	NA	Visual	NA
1	Zou_PatientC00231	9	9	NA	NA	Exact	Exposure	0	NA	NA	NA	Visual	NA	NA	Ct	40	NA	Figure 1	Virus	Upper_respiratory	NA	NA	Mild_Moderate	Diseased	RTPCR	N and ORF1b	SARS-CoV-2	Human	Zhuhai	Zou	2020	﻿10.1056/NEJMc2000231	Symptom descriptions in appendix	BB	1	Zou_2020_00231	PatientC	9	9	Exact	Exposure	Ct	0	40	NEG	NA	NA	Visual	NA
1	Zou_PatientD00231	0	0	NA	NA	Exact	Exposure	4.43398720448515	NA	NA	NA	Visual	NA	NA	Ct	40	NA	Figure 1	Virus	Upper_respiratory	NA	NA	Mild_Moderate	Diseased	RTPCR	N and ORF1b	SARS-CoV-2	Human	Zhuhai	Zou	2020	﻿10.1056/NEJMc2000231	Symptom descriptions in appendix	BB	1	Zou_2020_00231	PatientD	0	0	Exact	Exposure	Ct	31	40	POS	NA	NA	Visual	NA
1	Zou_PatientD00231	2	2	NA	NA	Exact	Exposure	4.04452243772342	NA	NA	NA	Visual	NA	NA	Ct	40	NA	Figure 1	Virus	Upper_respiratory	NA	NA	Mild_Moderate	Diseased	RTPCR	N and ORF1b	SARS-CoV-2	Human	Zhuhai	Zou	2020	﻿10.1056/NEJMc2000231	Symptom descriptions in appendix	BB	1	Zou_2020_00231	PatientD	2	2	Exact	Exposure	Ct	21	40	POS	NA	NA	Visual	NA
1	Zou_PatientD00231	5	5	NA	NA	Exact	Exposure	4.09104245335832	NA	NA	NA	Visual	NA	NA	Ct	40	NA	Figure 1	Virus	Upper_respiratory	NA	NA	Mild_Moderate	Diseased	RTPCR	N and ORF1b	SARS-CoV-2	Human	Zhuhai	Zou	2020	﻿10.1056/NEJMc2000231	Symptom descriptions in appendix	BB	1	Zou_2020_00231	PatientD	5	5	Exact	Exposure	Ct	22	40	POS	NA	NA	Visual	NA
1	Zou_PatientD00231	6	6	NA	NA	Exact	Exposure	4.43398720448515	NA	NA	NA	Visual	NA	NA	Ct	40	NA	Figure 1	Virus	Upper_respiratory	NA	NA	Mild_Moderate	Diseased	RTPCR	N and ORF1b	SARS-CoV-2	Human	Zhuhai	Zou	2020	﻿10.1056/NEJMc2000231	Symptom descriptions in appendix	BB	1	Zou_2020_00231	PatientD	6	6	Exact	Exposure	Ct	31	40	POS	NA	NA	Visual	NA
1	Zou_PatientE00231	6	6	NA	NA	Exact	Exposure	4.43398720448515	NA	NA	NA	Visual	NA	NA	Ct	40	NA	Figure 1	Virus	Upper_respiratory	NA	NA	Severe_Critical	Diseased	RTPCR	N and ORF1b	SARS-CoV-2	Human	Zhuhai	Zou	2020	﻿10.1056/NEJMc2000231	Symptom descriptions in appendix	BB	1	Zou_2020_00231	PatientE	6	6	Exact	Exposure	Ct	31	40	POS	NA	NA	Visual	NA
1	Zou_PatientE00231	7	7	NA	NA	Exact	Exposure	0	NA	NA	NA	Visual	NA	NA	Ct	40	NA	Figure 1	Virus	Upper_respiratory	NA	NA	Severe_Critical	Diseased	RTPCR	N and ORF1b	SARS-CoV-2	Human	Zhuhai	Zou	2020	﻿10.1056/NEJMc2000231	Symptom descriptions in appendix	BB	1	Zou_2020_00231	PatientE	7	7	Exact	Exposure	Ct	0	40	NEG	NA	NA	Visual	NA
1	Zou_PatientE00231	8	8	NA	NA	Exact	Exposure	0	NA	NA	NA	Visual	NA	NA	Ct	40	NA	Figure 1	Virus	Upper_respiratory	NA	NA	Severe_Critical	Diseased	RTPCR	N and ORF1b	SARS-CoV-2	Human	Zhuhai	Zou	2020	﻿10.1056/NEJMc2000231	Symptom descriptions in appendix	BB	1	Zou_2020_00231	PatientE	8	8	Exact	Exposure	Ct	0	40	NEG	NA	NA	Visual	NA
1	Zou_PatientE00231	10	10	NA	NA	Exact	Exposure	4.40119738166216	NA	NA	NA	Visual	NA	NA	Ct	40	NA	Figure 1	Virus	Upper_respiratory	NA	NA	Severe_Critical	Diseased	RTPCR	N and ORF1b	SARS-CoV-2	Human	Zhuhai	Zou	2020	﻿10.1056/NEJMc2000231	Symptom descriptions in appendix	BB	1	Zou_2020_00231	PatientE	10	10	Exact	Exposure	Ct	30	40	POS	NA	NA	Visual	NA
1	Zou_PatientE00231	11	11	NA	NA	Exact	Exposure	4.63758615972639	NA	NA	NA	Visual	NA	NA	Ct	40	NA	Figure 1	Virus	Upper_respiratory	NA	NA	Severe_Critical	Diseased	RTPCR	N and ORF1b	SARS-CoV-2	Human	Zhuhai	Zou	2020	﻿10.1056/NEJMc2000231	Symptom descriptions in appendix	BB	1	Zou_2020_00231	PatientE	11	11	Exact	Exposure	Ct	38	40	POS	NA	NA	Visual	NA
1	Zou_PatientF00231	7	7	NA	NA	Exact	Exposure	4.61091791264422	NA	NA	NA	Visual	NA	NA	Ct	40	NA	Figure 1	Virus	Upper_respiratory	NA	NA	Mild_Moderate	Diseased	RTPCR	N and ORF1b	SARS-CoV-2	Human	Zhuhai	Zou	2020	﻿10.1056/NEJMc2000231	Symptom descriptions in appendix	BB	1	Zou_2020_00231	PatientF	7	7	Exact	Exposure	Ct	37	40	POS	NA	NA	Visual	NA
1	Zou_PatientF00231	8	8	NA	NA	Exact	Exposure	0	NA	NA	NA	Visual	NA	NA	Ct	40	NA	Figure 1	Virus	Upper_respiratory	NA	NA	Mild_Moderate	Diseased	RTPCR	N and ORF1b	SARS-CoV-2	Human	Zhuhai	Zou	2020	﻿10.1056/NEJMc2000231	Symptom descriptions in appendix	BB	1	Zou_2020_00231	PatientF	8	8	Exact	Exposure	Ct	0	40	NEG	NA	NA	Visual	NA
1	Zou_PatientH00231	1	1	NA	NA	Exact	Exposure	4.29583686600433	NA	NA	NA	Visual	NA	NA	Ct	40	NA	Figure 1	Virus	Upper_respiratory	NA	NA	Mild_Moderate	Diseased	RTPCR	N and ORF1b	SARS-CoV-2	Human	Zhuhai	Zou	2020	﻿10.1056/NEJMc2000231	Symptom descriptions in appendix	BB	1	Zou_2020_00231	PatientH	1	1	Exact	Exposure	Ct	27	40	POS	NA	NA	Visual	NA
1	Zou_PatientH00231	3	3	NA	NA	Exact	Exposure	0	NA	NA	NA	Visual	NA	NA	Ct	40	NA	Figure 1	Virus	Upper_respiratory	NA	NA	Mild_Moderate	Diseased	RTPCR	N and ORF1b	SARS-CoV-2	Human	Zhuhai	Zou	2020	﻿10.1056/NEJMc2000231	Symptom descriptions in appendix	BB	1	Zou_2020_00231	PatientH	3	3	Exact	Exposure	Ct	0	40	NEG	NA	NA	Visual	NA
1	Zou_PatientH00231	4	4	NA	NA	Exact	Exposure	4.40119738166216	NA	NA	NA	Visual	NA	NA	Ct	40	NA	Figure 1	Virus	Upper_respiratory	NA	NA	Mild_Moderate	Diseased	RTPCR	N and ORF1b	SARS-CoV-2	Human	Zhuhai	Zou	2020	﻿10.1056/NEJMc2000231	Symptom descriptions in appendix	BB	1	Zou_2020_00231	PatientH	4	4	Exact	Exposure	Ct	30	40	POS	NA	NA	Visual	NA
1	Zou_PatientH00231	6	6	NA	NA	Exact	Exposure	0	NA	NA	NA	Visual	NA	NA	Ct	40	NA	Figure 1	Virus	Upper_respiratory	NA	NA	Mild_Moderate	Diseased	RTPCR	N and ORF1b	SARS-CoV-2	Human	Zhuhai	Zou	2020	﻿10.1056/NEJMc2000231	Symptom descriptions in appendix	BB	1	Zou_2020_00231	PatientH	6	6	Exact	Exposure	Ct	0	40	NEG	NA	NA	Visual	NA
1	Zou_PatientH00231	7	7	NA	NA	Exact	Exposure	4.40119738166216	NA	NA	NA	Visual	NA	NA	Ct	40	NA	Figure 1	Virus	Upper_respiratory	NA	NA	Mild_Moderate	Diseased	RTPCR	N and ORF1b	SARS-CoV-2	Human	Zhuhai	Zou	2020	﻿10.1056/NEJMc2000231	Symptom descriptions in appendix	BB	1	Zou_2020_00231	PatientH	7	7	Exact	Exposure	Ct	30	40	POS	NA	NA	Visual	NA
1	Zou_PatientH00231	8	8	NA	NA	Exact	Exposure	0	NA	NA	NA	Visual	NA	NA	Ct	40	NA	Figure 1	Virus	Upper_respiratory	NA	NA	Mild_Moderate	Diseased	RTPCR	N and ORF1b	SARS-CoV-2	Human	Zhuhai	Zou	2020	﻿10.1056/NEJMc2000231	Symptom descriptions in appendix	BB	1	Zou_2020_00231	PatientH	8	8	Exact	Exposure	Ct	0	40	NEG	NA	NA	Visual	NA
1	Zou_PatientH00231	10	10	NA	NA	Exact	Exposure	0	NA	NA	NA	Visual	NA	NA	Ct	40	NA	Figure 1	Virus	Upper_respiratory	NA	NA	Mild_Moderate	Diseased	RTPCR	N and ORF1b	SARS-CoV-2	Human	Zhuhai	Zou	2020	﻿10.1056/NEJMc2000231	Symptom descriptions in appendix	BB	1	Zou_2020_00231	PatientH	10	10	Exact	Exposure	Ct	0	40	NEG	NA	NA	Visual	NA
1	Zou_PatientI00231	6	6	NA	NA	Exact	Exposure	3.94443897916644	NA	NA	NA	Visual	NA	NA	Ct	40	NA	Figure 1	Virus	Upper_respiratory	NA	NA	Severe_Critical	Diseased	RTPCR	N and ORF1b	SARS-CoV-2	Human	Zhuhai	Zou	2020	﻿10.1056/NEJMc2000231	Symptom descriptions in appendix	BB	1	Zou_2020_00231	PatientI	6	6	Exact	Exposure	Ct	19	40	POS	NA	NA	Visual	NA
1	Zou_PatientI00231	10	10	NA	NA	Exact	Exposure	4.09104245335832	NA	NA	NA	Visual	NA	NA	Ct	40	NA	Figure 1	Virus	Upper_respiratory	NA	NA	Severe_Critical	Diseased	RTPCR	N and ORF1b	SARS-CoV-2	Human	Zhuhai	Zou	2020	﻿10.1056/NEJMc2000231	Symptom descriptions in appendix	BB	1	Zou_2020_00231	PatientI	10	10	Exact	Exposure	Ct	22	40	POS	NA	NA	Visual	NA
1	Zou_PatientI00231	12	12	NA	NA	Exact	Exposure	4.25809653802148	NA	NA	NA	Visual	NA	NA	Ct	40	NA	Figure 1	Virus	Upper_respiratory	NA	NA	Severe_Critical	Diseased	RTPCR	N and ORF1b	SARS-CoV-2	Human	Zhuhai	Zou	2020	﻿10.1056/NEJMc2000231	Symptom descriptions in appendix	BB	1	Zou_2020_00231	PatientI	12	12	Exact	Exposure	Ct	26	40	POS	NA	NA	Visual	NA
1	Zou_PatientI00231	13	13	NA	NA	Exact	Exposure	4.52636052461616	NA	NA	NA	Visual	NA	NA	Ct	40	NA	Figure 1	Virus	Upper_respiratory	NA	NA	Severe_Critical	Diseased	RTPCR	N and ORF1b	SARS-CoV-2	Human	Zhuhai	Zou	2020	﻿10.1056/NEJMc2000231	Symptom descriptions in appendix	BB	1	Zou_2020_00231	PatientI	13	13	Exact	Exposure	Ct	34	40	POS	NA	NA	Visual	NA
1	Zou_PatientK00231	8	8	NA	NA	Exact	Exposure	0	NA	NA	NA	Visual	NA	NA	Ct	40	NA	Figure 1	Virus	Upper_respiratory	NA	NA	Mild_Moderate	Diseased	RTPCR	N and ORF1b	SARS-CoV-2	Human	Zhuhai	Zou	2020	﻿10.1056/NEJMc2000231	Symptom descriptions in appendix	BB	1	Zou_2020_00231	PatientK	8	8	Exact	Exposure	Ct	0	40	NEG	NA	NA	Visual	NA
1	Zou_PatientK00231	9	9	NA	NA	Exact	Exposure	0	NA	NA	NA	Visual	NA	NA	Ct	40	NA	Figure 1	Virus	Upper_respiratory	NA	NA	Mild_Moderate	Diseased	RTPCR	N and ORF1b	SARS-CoV-2	Human	Zhuhai	Zou	2020	﻿10.1056/NEJMc2000231	Symptom descriptions in appendix	BB	1	Zou_2020_00231	PatientK	9	9	Exact	Exposure	Ct	0	40	NEG	NA	NA	Visual	NA
1	Zou_PatientK00231	12	12	NA	NA	Exact	Exposure	0	NA	NA	NA	Visual	NA	NA	Ct	40	NA	Figure 1	Virus	Upper_respiratory	NA	NA	Mild_Moderate	Diseased	RTPCR	N and ORF1b	SARS-CoV-2	Human	Zhuhai	Zou	2020	﻿10.1056/NEJMc2000231	Symptom descriptions in appendix	BB	1	Zou_2020_00231	PatientK	12	12	Exact	Exposure	Ct	0	40	NEG	NA	NA	Visual	NA
1	Zou_PatientK00231	14	14	NA	NA	Exact	Exposure	0	NA	NA	NA	Visual	NA	NA	Ct	40	NA	Figure 1	Virus	Upper_respiratory	NA	NA	Mild_Moderate	Diseased	RTPCR	N and ORF1b	SARS-CoV-2	Human	Zhuhai	Zou	2020	﻿10.1056/NEJMc2000231	Symptom descriptions in appendix	BB	1	Zou_2020_00231	PatientK	14	14	Exact	Exposure	Ct	0	40	NEG	NA	NA	Visual	NA
1	Zou_PatientK00231	15	15	NA	NA	Exact	Exposure	0	NA	NA	NA	Visual	NA	NA	Ct	40	NA	Figure 1	Virus	Upper_respiratory	NA	NA	Mild_Moderate	Diseased	RTPCR	N and ORF1b	SARS-CoV-2	Human	Zhuhai	Zou	2020	﻿10.1056/NEJMc2000231	Symptom descriptions in appendix	BB	1	Zou_2020_00231	PatientK	15	15	Exact	Exposure	Ct	0	40	NEG	NA	NA	Visual	NA
1	Zou_PatientL00231	3	3	NA	NA	Exact	Exposure	4.3322045101752	NA	NA	NA	Visual	NA	NA	Ct	40	NA	Figure 1	Virus	Upper_respiratory	NA	NA	Mild_Moderate	Diseased	RTPCR	N and ORF1b	SARS-CoV-2	Human	Zhuhai	Zou	2020	﻿10.1056/NEJMc2000231	Symptom descriptions in appendix	BB	1	Zou_2020_00231	PatientL	3	3	Exact	Exposure	Ct	28	40	POS	NA	NA	Visual	NA
1	Zou_PatientL00231	4	4	NA	NA	Exact	Exposure	4.04452243772342	NA	NA	NA	Visual	NA	NA	Ct	40	NA	Figure 1	Virus	Upper_respiratory	NA	NA	Mild_Moderate	Diseased	RTPCR	N and ORF1b	SARS-CoV-2	Human	Zhuhai	Zou	2020	﻿10.1056/NEJMc2000231	Symptom descriptions in appendix	BB	1	Zou_2020_00231	PatientL	4	4	Exact	Exposure	Ct	21	40	POS	NA	NA	Visual	NA
1	Zou_PatientL00231	5	5	NA	NA	Exact	Exposure	4.17805383034795	NA	NA	NA	Visual	NA	NA	Ct	40	NA	Figure 1	Virus	Upper_respiratory	NA	NA	Mild_Moderate	Diseased	RTPCR	N and ORF1b	SARS-CoV-2	Human	Zhuhai	Zou	2020	﻿10.1056/NEJMc2000231	Symptom descriptions in appendix	BB	1	Zou_2020_00231	PatientL	5	5	Exact	Exposure	Ct	24	40	POS	NA	NA	Visual	NA
1	Zou_PatientL00231	7	7	NA	NA	Exact	Exposure	4.40119738166216	NA	NA	NA	Visual	NA	NA	Ct	40	NA	Figure 1	Virus	Upper_respiratory	NA	NA	Mild_Moderate	Diseased	RTPCR	N and ORF1b	SARS-CoV-2	Human	Zhuhai	Zou	2020	﻿10.1056/NEJMc2000231	Symptom descriptions in appendix	BB	1	Zou_2020_00231	PatientL	7	7	Exact	Exposure	Ct	30	40	POS	NA	NA	Visual	NA
1	Zou_PatientL00231	8	8	NA	NA	Exact	Exposure	4.43398720448515	NA	NA	NA	Visual	NA	NA	Ct	40	NA	Figure 1	Virus	Upper_respiratory	NA	NA	Mild_Moderate	Diseased	RTPCR	N and ORF1b	SARS-CoV-2	Human	Zhuhai	Zou	2020	﻿10.1056/NEJMc2000231	Symptom descriptions in appendix	BB	1	Zou_2020_00231	PatientL	8	8	Exact	Exposure	Ct	31	40	POS	NA	NA	Visual	NA
1	Zou_PatientN00231	7	7	NA	NA	Exact	Exposure	4.52636052461616	NA	NA	NA	Visual	NA	NA	Ct	40	NA	Figure 1	Virus	Upper_respiratory	NA	NA	Mild_Moderate	Diseased	RTPCR	N and ORF1b	SARS-CoV-2	Human	Zhuhai	Zou	2020	﻿10.1056/NEJMc2000231	Symptom descriptions in appendix	BB	1	Zou_2020_00231	PatientN	7	7	Exact	Exposure	Ct	34	40	POS	NA	NA	Visual	NA
1	Zou_PatientN00231	8	8	NA	NA	Exact	Exposure	4.36729582998647	NA	NA	NA	Visual	NA	NA	Ct	40	NA	Figure 1	Virus	Upper_respiratory	NA	NA	Mild_Moderate	Diseased	RTPCR	N and ORF1b	SARS-CoV-2	Human	Zhuhai	Zou	2020	﻿10.1056/NEJMc2000231	Symptom descriptions in appendix	BB	1	Zou_2020_00231	PatientN	8	8	Exact	Exposure	Ct	29	40	POS	NA	NA	Visual	NA
1	Zou_PatientN00231	9	9	NA	NA	Exact	Exposure	0	NA	NA	NA	Visual	NA	NA	Ct	40	NA	Figure 1	Virus	Upper_respiratory	NA	NA	Mild_Moderate	Diseased	RTPCR	N and ORF1b	SARS-CoV-2	Human	Zhuhai	Zou	2020	﻿10.1056/NEJMc2000231	Symptom descriptions in appendix	BB	1	Zou_2020_00231	PatientN	9	9	Exact	Exposure	Ct	0	40	NEG	NA	NA	Visual	NA
1	Zou_PatientN00231	12	12	NA	NA	Exact	Exposure	0	NA	NA	NA	Visual	NA	NA	Ct	40	NA	Figure 1	Virus	Upper_respiratory	NA	NA	Mild_Moderate	Diseased	RTPCR	N and ORF1b	SARS-CoV-2	Human	Zhuhai	Zou	2020	﻿10.1056/NEJMc2000231	Symptom descriptions in appendix	BB	1	Zou_2020_00231	PatientN	12	12	Exact	Exposure	Ct	0	40	NEG	NA	NA	Visual	NA
1	Zou_PatientN00231	13	13	NA	NA	Exact	Exposure	4.52636052461616	NA	NA	NA	Visual	NA	NA	Ct	40	NA	Figure 1	Virus	Upper_respiratory	NA	NA	Mild_Moderate	Diseased	RTPCR	N and ORF1b	SARS-CoV-2	Human	Zhuhai	Zou	2020	﻿10.1056/NEJMc2000231	Symptom descriptions in appendix	BB	1	Zou_2020_00231	PatientN	13	13	Exact	Exposure	Ct	34	40	POS	NA	NA	Visual	NA
1	Zou_PatientN00231	16	16	NA	NA	Exact	Exposure	0	NA	NA	NA	Visual	NA	NA	Ct	40	NA	Figure 1	Virus	Upper_respiratory	NA	NA	Mild_Moderate	Diseased	RTPCR	N and ORF1b	SARS-CoV-2	Human	Zhuhai	Zou	2020	﻿10.1056/NEJMc2000231	Symptom descriptions in appendix	BB	1	Zou_2020_00231	PatientN	16	16	Exact	Exposure	Ct	0	40	NEG	NA	NA	Visual	NA
1	Zou_PatientN00231	17	17	NA	NA	Exact	Exposure	4.63758615972639	NA	NA	NA	Visual	NA	NA	Ct	40	NA	Figure 1	Virus	Upper_respiratory	NA	NA	Mild_Moderate	Diseased	RTPCR	N and ORF1b	SARS-CoV-2	Human	Zhuhai	Zou	2020	﻿10.1056/NEJMc2000231	Symptom descriptions in appendix	BB	1	Zou_2020_00231	PatientN	17	17	Exact	Exposure	Ct	38	40	POS	NA	NA	Visual	NA
1	Zou_PatientO00231	1	1	NA	NA	Exact	Exposure	4.29583686600433	NA	NA	NA	Visual	NA	NA	Ct	40	NA	Figure 1	Virus	Upper_respiratory	NA	NA	Mild_Moderate	Diseased	RTPCR	N and ORF1b	SARS-CoV-2	Human	Zhuhai	Zou	2020	﻿10.1056/NEJMc2000231	Symptom descriptions in appendix	BB	1	Zou_2020_00231	PatientO	1	1	Exact	Exposure	Ct	27	40	POS	NA	NA	Visual	NA
1	Zou_PatientO00231	4	4	NA	NA	Exact	Exposure	4.63758615972639	NA	NA	NA	Visual	NA	NA	Ct	40	NA	Figure 1	Virus	Upper_respiratory	NA	NA	Mild_Moderate	Diseased	RTPCR	N and ORF1b	SARS-CoV-2	Human	Zhuhai	Zou	2020	﻿10.1056/NEJMc2000231	Symptom descriptions in appendix	BB	1	Zou_2020_00231	PatientO	4	4	Exact	Exposure	Ct	38	40	POS	NA	NA	Visual	NA
1	Zou_PatientO00231	5	5	NA	NA	Exact	Exposure	4.58351893845611	NA	NA	NA	Visual	NA	NA	Ct	40	NA	Figure 1	Virus	Upper_respiratory	NA	NA	Mild_Moderate	Diseased	RTPCR	N and ORF1b	SARS-CoV-2	Human	Zhuhai	Zou	2020	﻿10.1056/NEJMc2000231	Symptom descriptions in appendix	BB	1	Zou_2020_00231	PatientO	5	5	Exact	Exposure	Ct	36	40	POS	NA	NA	Visual	NA
1	Zou_PatientO00231	7	7	NA	NA	Exact	Exposure	0	NA	NA	NA	Visual	NA	NA	Ct	40	NA	Figure 1	Virus	Upper_respiratory	NA	NA	Mild_Moderate	Diseased	RTPCR	N and ORF1b	SARS-CoV-2	Human	Zhuhai	Zou	2020	﻿10.1056/NEJMc2000231	Symptom descriptions in appendix	BB	1	Zou_2020_00231	PatientO	7	7	Exact	Exposure	Ct	0	40	NEG	NA	NA	Visual	NA
1	Zou_PatientP00231	7	7	NA	NA	Exact	Exposure	4.3322045101752	NA	NA	NA	Visual	NA	NA	Ct	40	NA	Figure 1	Virus	Upper_respiratory	NA	NA	Severe_Critical	Diseased	RTPCR	N and ORF1b	SARS-CoV-2	Human	Zhuhai	Zou	2020	﻿10.1056/NEJMc2000231	Symptom descriptions in appendix	BB	1	Zou_2020_00231	PatientP	7	7	Exact	Exposure	Ct	28	40	POS	NA	NA	Visual	NA
1	Zou_PatientP00231	9	9	NA	NA	Exact	Exposure	0	NA	NA	NA	Visual	NA	NA	Ct	40	NA	Figure 1	Virus	Upper_respiratory	NA	NA	Severe_Critical	Diseased	RTPCR	N and ORF1b	SARS-CoV-2	Human	Zhuhai	Zou	2020	﻿10.1056/NEJMc2000231	Symptom descriptions in appendix	BB	1	Zou_2020_00231	PatientP	9	9	Exact	Exposure	Ct	0	40	NEG	NA	NA	Visual	NA
1	Zou_PatientP00231	10	10	NA	NA	Exact	Exposure	0	NA	NA	NA	Visual	NA	NA	Ct	40	NA	Figure 1	Virus	Upper_respiratory	NA	NA	Severe_Critical	Diseased	RTPCR	N and ORF1b	SARS-CoV-2	Human	Zhuhai	Zou	2020	﻿10.1056/NEJMc2000231	Symptom descriptions in appendix	BB	1	Zou_2020_00231	PatientP	10	10	Exact	Exposure	Ct	0	40	NEG	NA	NA	Visual	NA
1	Zou_PatientP00231	12	12	NA	NA	Exact	Exposure	4.61091791264422	NA	NA	NA	Visual	NA	NA	Ct	40	NA	Figure 1	Virus	Upper_respiratory	NA	NA	Severe_Critical	Diseased	RTPCR	N and ORF1b	SARS-CoV-2	Human	Zhuhai	Zou	2020	﻿10.1056/NEJMc2000231	Symptom descriptions in appendix	BB	1	Zou_2020_00231	PatientP	12	12	Exact	Exposure	Ct	37	40	POS	NA	NA	Visual	NA
1	Zou_PatientP00231	13	13	NA	NA	Exact	Exposure	0	NA	NA	NA	Visual	NA	NA	Ct	40	NA	Figure 1	Virus	Upper_respiratory	NA	NA	Severe_Critical	Diseased	RTPCR	N and ORF1b	SARS-CoV-2	Human	Zhuhai	Zou	2020	﻿10.1056/NEJMc2000231	Symptom descriptions in appendix	BB	1	Zou_2020_00231	PatientP	13	13	Exact	Exposure	Ct	0	40	NEG	NA	NA	Visual	NA
1	Zou_PatientP00231	14	14	NA	NA	Exact	Exposure	0	NA	NA	NA	Visual	NA	NA	Ct	40	NA	Figure 1	Virus	Upper_respiratory	NA	NA	Severe_Critical	Diseased	RTPCR	N and ORF1b	SARS-CoV-2	Human	Zhuhai	Zou	2020	﻿10.1056/NEJMc2000231	Symptom descriptions in appendix	BB	1	Zou_2020_00231	PatientP	14	14	Exact	Exposure	Ct	0	40	NEG	NA	NA	Visual	NA
1	Zou_PatientQ00231	7	7	NA	NA	Exact	Exposure	4.52636052461616	NA	NA	NA	Visual	NA	NA	Ct	40	NA	Figure 1	Virus	Upper_respiratory	NA	NA	Mild_Moderate	Diseased	RTPCR	N and ORF1b	SARS-CoV-2	Human	Zhuhai	Zou	2020	﻿10.1056/NEJMc2000231	Symptom descriptions in appendix	BB	1	Zou_2020_00231	PatientQ	7	7	Exact	Exposure	Ct	34	40	POS	NA	NA	Visual	NA
1	Zou_PatientQ00231	8	8	NA	NA	Exact	Exposure	4.36729582998647	NA	NA	NA	Visual	NA	NA	Ct	40	NA	Figure 1	Virus	Upper_respiratory	NA	NA	Mild_Moderate	Diseased	RTPCR	N and ORF1b	SARS-CoV-2	Human	Zhuhai	Zou	2020	﻿10.1056/NEJMc2000231	Symptom descriptions in appendix	BB	1	Zou_2020_00231	PatientQ	8	8	Exact	Exposure	Ct	29	40	POS	NA	NA	Visual	NA
1	Zou_PatientQ00231	9	9	NA	NA	Exact	Exposure	0	NA	NA	NA	Visual	NA	NA	Ct	40	NA	Figure 1	Virus	Upper_respiratory	NA	NA	Mild_Moderate	Diseased	RTPCR	N and ORF1b	SARS-CoV-2	Human	Zhuhai	Zou	2020	﻿10.1056/NEJMc2000231	Symptom descriptions in appendix	BB	1	Zou_2020_00231	PatientQ	9	9	Exact	Exposure	Ct	0	40	NEG	NA	NA	Visual	NA
1	Zou_PatientS00231	15	15	NA	NA	Exact	Exposure	4.61091791264422	NA	NA	NA	Visual	NA	NA	Ct	40	NA	Figure 1	Virus	Upper_respiratory	NA	NA	Mild_Moderate	Diseased	RTPCR	N and ORF1b	SARS-CoV-2	Human	Zhuhai	Zou	2020	﻿10.1056/NEJMc2000231	Symptom descriptions in appendix	BB	1	Zou_2020_00231	PatientS	15	15	Exact	Exposure	Ct	37	40	POS	NA	NA	Visual	NA
1	Zou_PatientS00231	17	17	NA	NA	Exact	Exposure	0	NA	NA	NA	Visual	NA	NA	Ct	40	NA	Figure 1	Virus	Upper_respiratory	NA	NA	Mild_Moderate	Diseased	RTPCR	N and ORF1b	SARS-CoV-2	Human	Zhuhai	Zou	2020	﻿10.1056/NEJMc2000231	Symptom descriptions in appendix	BB	1	Zou_2020_00231	PatientS	17	17	Exact	Exposure	Ct	0	40	NEG	NA	NA	Visual	NA
1	Zou_PatientS00231	18	18	NA	NA	Exact	Exposure	0	NA	NA	NA	Visual	NA	NA	Ct	40	NA	Figure 1	Virus	Upper_respiratory	NA	NA	Mild_Moderate	Diseased	RTPCR	N and ORF1b	SARS-CoV-2	Human	Zhuhai	Zou	2020	﻿10.1056/NEJMc2000231	Symptom descriptions in appendix	BB	1	Zou_2020_00231	PatientS	18	18	Exact	Exposure	Ct	0	40	NEG	NA	NA	Visual	NA
1	Zou_PatientS00231	20	20	NA	NA	Exact	Exposure	0	NA	NA	NA	Visual	NA	NA	Ct	40	NA	Figure 1	Virus	Upper_respiratory	NA	NA	Mild_Moderate	Diseased	RTPCR	N and ORF1b	SARS-CoV-2	Human	Zhuhai	Zou	2020	﻿10.1056/NEJMc2000231	Symptom descriptions in appendix	BB	1	Zou_2020_00231	PatientS	20	20	Exact	Exposure	Ct	0	40	NEG	NA	NA	Visual	NA
1	Zou_PatientS00231	21	21	NA	NA	Exact	Exposure	4.63758615972639	NA	NA	NA	Visual	NA	NA	Ct	40	NA	Figure 1	Virus	Upper_respiratory	NA	NA	Mild_Moderate	Diseased	RTPCR	N and ORF1b	SARS-CoV-2	Human	Zhuhai	Zou	2020	﻿10.1056/NEJMc2000231	Symptom descriptions in appendix	BB	1	Zou_2020_00231	PatientS	21	21	Exact	Exposure	Ct	38	40	POS	NA	NA	Visual	NA
1	Zou_PatientT00231	3	3	NA	NA	Exact	Exposure	4.55534806148941	NA	NA	NA	Visual	NA	NA	Ct	40	NA	Figure 1	Virus	Upper_respiratory	NA	NA	Mild_Moderate	Diseased	RTPCR	N and ORF1b	SARS-CoV-2	Human	Zhuhai	Zou	2020	﻿10.1056/NEJMc2000231	Symptom descriptions in appendix	BB	1	Zou_2020_00231	PatientT	3	3	Exact	Exposure	Ct	35	40	POS	NA	NA	Visual	NA
1	Zou_PatientT00231	6	6	NA	NA	Exact	Exposure	4.40119738166216	NA	NA	NA	Visual	NA	NA	Ct	40	NA	Figure 1	Virus	Upper_respiratory	NA	NA	Mild_Moderate	Diseased	RTPCR	N and ORF1b	SARS-CoV-2	Human	Zhuhai	Zou	2020	﻿10.1056/NEJMc2000231	Symptom descriptions in appendix	BB	1	Zou_2020_00231	PatientT	6	6	Exact	Exposure	Ct	30	40	POS	NA	NA	Visual	NA
1	Zou_PatientT00231	7	7	NA	NA	Exact	Exposure	4.40119738166216	NA	NA	NA	Visual	NA	NA	Ct	40	NA	Figure 1	Virus	Upper_respiratory	NA	NA	Mild_Moderate	Diseased	RTPCR	N and ORF1b	SARS-CoV-2	Human	Zhuhai	Zou	2020	﻿10.1056/NEJMc2000231	Symptom descriptions in appendix	BB	1	Zou_2020_00231	PatientT	7	7	Exact	Exposure	Ct	30	40	POS	NA	NA	Visual	NA
1	Zou_PatientX00231	8	8	NA	NA	Exact	Exposure	4.43398720448515	NA	NA	NA	Visual	NA	NA	Ct	40	NA	Figure 1	Virus	Upper_respiratory	NA	NA	Mild_Moderate	Diseased	RTPCR	N and ORF1b	SARS-CoV-2	Human	Zhuhai	Zou	2020	﻿10.1056/NEJMc2000231	Symptom descriptions in appendix	BB	1	Zou_2020_00231	PatientX	8	8	Exact	Exposure	Ct	31	40	POS	NA	NA	Visual	NA
1	Zou_PatientB00231	3	3	NA	NA	Exact	Exposure	4.09104245335832	NA	NA	NA	Visual	NA	NA	Ct	40	NA	Figure 1	Virus	Upper_respiratory	NA	NA	Mild_Moderate	Diseased	RTPCR	N and ORF1b	SARS-CoV-2	Human	Zhuhai	Zou	2020	﻿10.1056/NEJMc2000231	Symptom descriptions in appendix	BB	1	Zou_2020_00231	PatientB	3	3	Exact	Exposure	Ct	22	40	POS	NA	NA	Visual	NA
1	Zou_PatientC00231	4	4	NA	NA	Exact	Exposure	4.55534806148941	NA	NA	NA	Visual	NA	NA	Ct	40	NA	Figure 1	Virus	Upper_respiratory	NA	NA	Mild_Moderate	Diseased	RTPCR	N and ORF1b	SARS-CoV-2	Human	Zhuhai	Zou	2020	﻿10.1056/NEJMc2000231	Symptom descriptions in appendix	BB	1	Zou_2020_00231	PatientC	4	4	Exact	Exposure	Ct	35	40	POS	NA	NA	Visual	NA
1	Zou_PatientC00231	5	5	NA	NA	Exact	Exposure	0	NA	NA	NA	Visual	NA	NA	Ct	40	NA	Figure 1	Virus	Upper_respiratory	NA	NA	Mild_Moderate	Diseased	RTPCR	N and ORF1b	SARS-CoV-2	Human	Zhuhai	Zou	2020	﻿10.1056/NEJMc2000231	Symptom descriptions in appendix	BB	1	Zou_2020_00231	PatientC	5	5	Exact	Exposure	Ct	0	40	NEG	NA	NA	Visual	NA
1	Zou_PatientC00231	8	8	NA	NA	Exact	Exposure	0	NA	NA	NA	Visual	NA	NA	Ct	40	NA	Figure 1	Virus	Upper_respiratory	NA	NA	Mild_Moderate	Diseased	RTPCR	N and ORF1b	SARS-CoV-2	Human	Zhuhai	Zou	2020	﻿10.1056/NEJMc2000231	Symptom descriptions in appendix	BB	1	Zou_2020_00231	PatientC	8	8	Exact	Exposure	Ct	0	40	NEG	NA	NA	Visual	NA
1	Zou_PatientC00231	9	9	NA	NA	Exact	Exposure	4.63758615972639	NA	NA	NA	Visual	NA	NA	Ct	40	NA	Figure 1	Virus	Upper_respiratory	NA	NA	Mild_Moderate	Diseased	RTPCR	N and ORF1b	SARS-CoV-2	Human	Zhuhai	Zou	2020	﻿10.1056/NEJMc2000231	Symptom descriptions in appendix	BB	1	Zou_2020_00231	PatientC	9	9	Exact	Exposure	Ct	38	40	POS	NA	NA	Visual	NA
1	Zou_PatientD00231	0	0	NA	NA	Exact	Exposure	4.25809653802148	NA	NA	NA	Visual	NA	NA	Ct	40	NA	Figure 1	Virus	Upper_respiratory	NA	NA	Mild_Moderate	Diseased	RTPCR	N and ORF1b	SARS-CoV-2	Human	Zhuhai	Zou	2020	﻿10.1056/NEJMc2000231	Symptom descriptions in appendix	BB	1	Zou_2020_00231	PatientD	0	0	Exact	Exposure	Ct	26	40	POS	NA	NA	Visual	NA
1	Zou_PatientD00231	2	2	NA	NA	Exact	Exposure	0	NA	NA	NA	Visual	NA	NA	Ct	40	NA	Figure 1	Virus	Upper_respiratory	NA	NA	Mild_Moderate	Diseased	RTPCR	N and ORF1b	SARS-CoV-2	Human	Zhuhai	Zou	2020	﻿10.1056/NEJMc2000231	Symptom descriptions in appendix	BB	1	Zou_2020_00231	PatientD	2	2	Exact	Exposure	Ct	0	40	NEG	NA	NA	Visual	NA
1	Zou_PatientD00231	5	5	NA	NA	Exact	Exposure	4.49650756146648	NA	NA	NA	Visual	NA	NA	Ct	40	NA	Figure 1	Virus	Upper_respiratory	NA	NA	Mild_Moderate	Diseased	RTPCR	N and ORF1b	SARS-CoV-2	Human	Zhuhai	Zou	2020	﻿10.1056/NEJMc2000231	Symptom descriptions in appendix	BB	1	Zou_2020_00231	PatientD	5	5	Exact	Exposure	Ct	33	40	POS	NA	NA	Visual	NA
1	Zou_PatientD00231	6	6	NA	NA	Exact	Exposure	0	NA	NA	NA	Visual	NA	NA	Ct	40	NA	Figure 1	Virus	Upper_respiratory	NA	NA	Mild_Moderate	Diseased	RTPCR	N and ORF1b	SARS-CoV-2	Human	Zhuhai	Zou	2020	﻿10.1056/NEJMc2000231	Symptom descriptions in appendix	BB	1	Zou_2020_00231	PatientD	6	6	Exact	Exposure	Ct	0	40	NEG	NA	NA	Visual	NA
1	Zou_PatientE00231	6	6	NA	NA	Exact	Exposure	0	NA	NA	NA	Visual	NA	NA	Ct	40	NA	Figure 1	Virus	Upper_respiratory	NA	NA	Severe_Critical	Diseased	RTPCR	N and ORF1b	SARS-CoV-2	Human	Zhuhai	Zou	2020	﻿10.1056/NEJMc2000231	Symptom descriptions in appendix	BB	1	Zou_2020_00231	PatientE	6	6	Exact	Exposure	Ct	0	40	NEG	NA	NA	Visual	NA
1	Zou_PatientE00231	7	7	NA	NA	Exact	Exposure	0	NA	NA	NA	Visual	NA	NA	Ct	40	NA	Figure 1	Virus	Upper_respiratory	NA	NA	Severe_Critical	Diseased	RTPCR	N and ORF1b	SARS-CoV-2	Human	Zhuhai	Zou	2020	﻿10.1056/NEJMc2000231	Symptom descriptions in appendix	BB	1	Zou_2020_00231	PatientE	7	7	Exact	Exposure	Ct	0	40	NEG	NA	NA	Visual	NA
1	Zou_PatientE00231	8	8	NA	NA	Exact	Exposure	0	NA	NA	NA	Visual	NA	NA	Ct	40	NA	Figure 1	Virus	Upper_respiratory	NA	NA	Severe_Critical	Diseased	RTPCR	N and ORF1b	SARS-CoV-2	Human	Zhuhai	Zou	2020	﻿10.1056/NEJMc2000231	Symptom descriptions in appendix	BB	1	Zou_2020_00231	PatientE	8	8	Exact	Exposure	Ct	0	40	NEG	NA	NA	Visual	NA
1	Zou_PatientE00231	10	10	NA	NA	Exact	Exposure	4.40119738166216	NA	NA	NA	Visual	NA	NA	Ct	40	NA	Figure 1	Virus	Upper_respiratory	NA	NA	Severe_Critical	Diseased	RTPCR	N and ORF1b	SARS-CoV-2	Human	Zhuhai	Zou	2020	﻿10.1056/NEJMc2000231	Symptom descriptions in appendix	BB	1	Zou_2020_00231	PatientE	10	10	Exact	Exposure	Ct	30	40	POS	NA	NA	Visual	NA
1	Zou_PatientE00231	11	11	NA	NA	Exact	Exposure	4.40119738166216	NA	NA	NA	Visual	NA	NA	Ct	40	NA	Figure 1	Virus	Upper_respiratory	NA	NA	Severe_Critical	Diseased	RTPCR	N and ORF1b	SARS-CoV-2	Human	Zhuhai	Zou	2020	﻿10.1056/NEJMc2000231	Symptom descriptions in appendix	BB	1	Zou_2020_00231	PatientE	11	11	Exact	Exposure	Ct	30	40	POS	NA	NA	Visual	NA
1	Zou_PatientF00231	7	7	NA	NA	Exact	Exposure	4.52636052461616	NA	NA	NA	Visual	NA	NA	Ct	40	NA	Figure 1	Virus	Upper_respiratory	NA	NA	Mild_Moderate	Diseased	RTPCR	N and ORF1b	SARS-CoV-2	Human	Zhuhai	Zou	2020	﻿10.1056/NEJMc2000231	Symptom descriptions in appendix	BB	1	Zou_2020_00231	PatientF	7	7	Exact	Exposure	Ct	34	40	POS	NA	NA	Visual	NA
1	Zou_PatientF00231	8	8	NA	NA	Exact	Exposure	0	NA	NA	NA	Visual	NA	NA	Ct	40	NA	Figure 1	Virus	Upper_respiratory	NA	NA	Mild_Moderate	Diseased	RTPCR	N and ORF1b	SARS-CoV-2	Human	Zhuhai	Zou	2020	﻿10.1056/NEJMc2000231	Symptom descriptions in appendix	BB	1	Zou_2020_00231	PatientF	8	8	Exact	Exposure	Ct	0	40	NEG	NA	NA	Visual	NA
1	Zou_PatientF00231	12	12	NA	NA	Exact	Exposure	0	NA	NA	NA	Visual	NA	NA	Ct	40	NA	Figure 1	Virus	Upper_respiratory	NA	NA	Mild_Moderate	Diseased	RTPCR	N and ORF1b	SARS-CoV-2	Human	Zhuhai	Zou	2020	﻿10.1056/NEJMc2000231	Symptom descriptions in appendix	BB	1	Zou_2020_00231	PatientF	12	12	Exact	Exposure	Ct	0	40	NEG	NA	NA	Visual	NA
1	Zou_PatientH00231	1	1	NA	NA	Exact	Exposure	4.43398720448515	NA	NA	NA	Visual	NA	NA	Ct	40	NA	Figure 1	Virus	Upper_respiratory	NA	NA	Mild_Moderate	Diseased	RTPCR	N and ORF1b	SARS-CoV-2	Human	Zhuhai	Zou	2020	﻿10.1056/NEJMc2000231	Symptom descriptions in appendix	BB	1	Zou_2020_00231	PatientH	1	1	Exact	Exposure	Ct	31	40	POS	NA	NA	Visual	NA
1	Zou_PatientH00231	3	3	NA	NA	Exact	Exposure	0	NA	NA	NA	Visual	NA	NA	Ct	40	NA	Figure 1	Virus	Upper_respiratory	NA	NA	Mild_Moderate	Diseased	RTPCR	N and ORF1b	SARS-CoV-2	Human	Zhuhai	Zou	2020	﻿10.1056/NEJMc2000231	Symptom descriptions in appendix	BB	1	Zou_2020_00231	PatientH	3	3	Exact	Exposure	Ct	0	40	NEG	NA	NA	Visual	NA
1	Zou_PatientH00231	4	4	NA	NA	Exact	Exposure	0	NA	NA	NA	Visual	NA	NA	Ct	40	NA	Figure 1	Virus	Upper_respiratory	NA	NA	Mild_Moderate	Diseased	RTPCR	N and ORF1b	SARS-CoV-2	Human	Zhuhai	Zou	2020	﻿10.1056/NEJMc2000231	Symptom descriptions in appendix	BB	1	Zou_2020_00231	PatientH	4	4	Exact	Exposure	Ct	0	40	NEG	NA	NA	Visual	NA
1	Zou_PatientH00231	6	6	NA	NA	Exact	Exposure	0	NA	NA	NA	Visual	NA	NA	Ct	40	NA	Figure 1	Virus	Upper_respiratory	NA	NA	Mild_Moderate	Diseased	RTPCR	N and ORF1b	SARS-CoV-2	Human	Zhuhai	Zou	2020	﻿10.1056/NEJMc2000231	Symptom descriptions in appendix	BB	1	Zou_2020_00231	PatientH	6	6	Exact	Exposure	Ct	0	40	NEG	NA	NA	Visual	NA
1	Zou_PatientH00231	7	7	NA	NA	Exact	Exposure	0	NA	NA	NA	Visual	NA	NA	Ct	40	NA	Figure 1	Virus	Upper_respiratory	NA	NA	Mild_Moderate	Diseased	RTPCR	N and ORF1b	SARS-CoV-2	Human	Zhuhai	Zou	2020	﻿10.1056/NEJMc2000231	Symptom descriptions in appendix	BB	1	Zou_2020_00231	PatientH	7	7	Exact	Exposure	Ct	0	40	NEG	NA	NA	Visual	NA
1	Zou_PatientH00231	8	8	NA	NA	Exact	Exposure	0	NA	NA	NA	Visual	NA	NA	Ct	40	NA	Figure 1	Virus	Upper_respiratory	NA	NA	Mild_Moderate	Diseased	RTPCR	N and ORF1b	SARS-CoV-2	Human	Zhuhai	Zou	2020	﻿10.1056/NEJMc2000231	Symptom descriptions in appendix	BB	1	Zou_2020_00231	PatientH	8	8	Exact	Exposure	Ct	0	40	NEG	NA	NA	Visual	NA
1	Zou_PatientH00231	9	9	NA	NA	Exact	Exposure	0	NA	NA	NA	Visual	NA	NA	Ct	40	NA	Figure 1	Virus	Upper_respiratory	NA	NA	Mild_Moderate	Diseased	RTPCR	N and ORF1b	SARS-CoV-2	Human	Zhuhai	Zou	2020	﻿10.1056/NEJMc2000231	Symptom descriptions in appendix	BB	1	Zou_2020_00231	PatientH	9	9	Exact	Exposure	Ct	0	40	NEG	NA	NA	Visual	NA
1	Zou_PatientH00231	10	10	NA	NA	Exact	Exposure	0	NA	NA	NA	Visual	NA	NA	Ct	40	NA	Figure 1	Virus	Upper_respiratory	NA	NA	Mild_Moderate	Diseased	RTPCR	N and ORF1b	SARS-CoV-2	Human	Zhuhai	Zou	2020	﻿10.1056/NEJMc2000231	Symptom descriptions in appendix	BB	1	Zou_2020_00231	PatientH	10	10	Exact	Exposure	Ct	0	40	NEG	NA	NA	Visual	NA
1	Zou_PatientH00231	11	11	NA	NA	Exact	Exposure	4.52636052461616	NA	NA	NA	Visual	NA	NA	Ct	40	NA	Figure 1	Virus	Upper_respiratory	NA	NA	Mild_Moderate	Diseased	RTPCR	N and ORF1b	SARS-CoV-2	Human	Zhuhai	Zou	2020	﻿10.1056/NEJMc2000231	Symptom descriptions in appendix	BB	1	Zou_2020_00231	PatientH	11	11	Exact	Exposure	Ct	34	40	POS	NA	NA	Visual	NA
1	Zou_PatientI00231	6	6	NA	NA	Exact	Exposure	3.94443897916644	NA	NA	NA	Visual	NA	NA	Ct	40	NA	Figure 1	Virus	Upper_respiratory	NA	NA	Severe_Critical	Diseased	RTPCR	N and ORF1b	SARS-CoV-2	Human	Zhuhai	Zou	2020	﻿10.1056/NEJMc2000231	Symptom descriptions in appendix	BB	1	Zou_2020_00231	PatientI	6	6	Exact	Exposure	Ct	19	40	POS	NA	NA	Visual	NA
1	Zou_PatientI00231	9	9	NA	NA	Exact	Exposure	0	NA	NA	NA	Visual	NA	NA	Ct	40	NA	Figure 1	Virus	Upper_respiratory	NA	NA	Severe_Critical	Diseased	RTPCR	N and ORF1b	SARS-CoV-2	Human	Zhuhai	Zou	2020	﻿10.1056/NEJMc2000231	Symptom descriptions in appendix	BB	1	Zou_2020_00231	PatientI	9	9	Exact	Exposure	Ct	0	40	NEG	NA	NA	Visual	NA
1	Zou_PatientI00231	13	13	NA	NA	Exact	Exposure	4.43398720448515	NA	NA	NA	Visual	NA	NA	Ct	40	NA	Figure 1	Virus	Upper_respiratory	NA	NA	Severe_Critical	Diseased	RTPCR	N and ORF1b	SARS-CoV-2	Human	Zhuhai	Zou	2020	﻿10.1056/NEJMc2000231	Symptom descriptions in appendix	BB	1	Zou_2020_00231	PatientI	13	13	Exact	Exposure	Ct	31	40	POS	NA	NA	Visual	NA
1	Zou_PatientI00231	14	14	NA	NA	Exact	Exposure	4.43398720448515	NA	NA	NA	Visual	NA	NA	Ct	40	NA	Figure 1	Virus	Upper_respiratory	NA	NA	Severe_Critical	Diseased	RTPCR	N and ORF1b	SARS-CoV-2	Human	Zhuhai	Zou	2020	﻿10.1056/NEJMc2000231	Symptom descriptions in appendix	BB	1	Zou_2020_00231	PatientI	14	14	Exact	Exposure	Ct	31	40	POS	NA	NA	Visual	NA
1	Zou_PatientK00231	10	10	NA	NA	Exact	Exposure	0	NA	NA	NA	Visual	NA	NA	Ct	40	NA	Figure 1	Virus	Upper_respiratory	NA	NA	Mild_Moderate	Diseased	RTPCR	N and ORF1b	SARS-CoV-2	Human	Zhuhai	Zou	2020	﻿10.1056/NEJMc2000231	Symptom descriptions in appendix	BB	1	Zou_2020_00231	PatientK	10	10	Exact	Exposure	Ct	0	40	NEG	NA	NA	Visual	NA
1	Zou_PatientK00231	12	12	NA	NA	Exact	Exposure	0	NA	NA	NA	Visual	NA	NA	Ct	40	NA	Figure 1	Virus	Upper_respiratory	NA	NA	Mild_Moderate	Diseased	RTPCR	N and ORF1b	SARS-CoV-2	Human	Zhuhai	Zou	2020	﻿10.1056/NEJMc2000231	Symptom descriptions in appendix	BB	1	Zou_2020_00231	PatientK	12	12	Exact	Exposure	Ct	0	40	NEG	NA	NA	Visual	NA
1	Zou_PatientK00231	14	14	NA	NA	Exact	Exposure	0	NA	NA	NA	Visual	NA	NA	Ct	40	NA	Figure 1	Virus	Upper_respiratory	NA	NA	Mild_Moderate	Diseased	RTPCR	N and ORF1b	SARS-CoV-2	Human	Zhuhai	Zou	2020	﻿10.1056/NEJMc2000231	Symptom descriptions in appendix	BB	1	Zou_2020_00231	PatientK	14	14	Exact	Exposure	Ct	0	40	NEG	NA	NA	Visual	NA
1	Zou_PatientK00231	15	15	NA	NA	Exact	Exposure	0	NA	NA	NA	Visual	NA	NA	Ct	40	NA	Figure 1	Virus	Upper_respiratory	NA	NA	Mild_Moderate	Diseased	RTPCR	N and ORF1b	SARS-CoV-2	Human	Zhuhai	Zou	2020	﻿10.1056/NEJMc2000231	Symptom descriptions in appendix	BB	1	Zou_2020_00231	PatientK	15	15	Exact	Exposure	Ct	0	40	NEG	NA	NA	Visual	NA
1	Zou_PatientL00231	3	3	NA	NA	Exact	Exposure	4.63758615972639	NA	NA	NA	Visual	NA	NA	Ct	40	NA	Figure 1	Virus	Upper_respiratory	NA	NA	Mild_Moderate	Diseased	RTPCR	N and ORF1b	SARS-CoV-2	Human	Zhuhai	Zou	2020	﻿10.1056/NEJMc2000231	Symptom descriptions in appendix	BB	1	Zou_2020_00231	PatientL	3	3	Exact	Exposure	Ct	38	40	POS	NA	NA	Visual	NA
1	Zou_PatientL00231	4	4	NA	NA	Exact	Exposure	4.58351893845611	NA	NA	NA	Visual	NA	NA	Ct	40	NA	Figure 1	Virus	Upper_respiratory	NA	NA	Mild_Moderate	Diseased	RTPCR	N and ORF1b	SARS-CoV-2	Human	Zhuhai	Zou	2020	﻿10.1056/NEJMc2000231	Symptom descriptions in appendix	BB	1	Zou_2020_00231	PatientL	4	4	Exact	Exposure	Ct	36	40	POS	NA	NA	Visual	NA
1	Zou_PatientL00231	5	5	NA	NA	Exact	Exposure	4.58351893845611	NA	NA	NA	Visual	NA	NA	Ct	40	NA	Figure 1	Virus	Upper_respiratory	NA	NA	Mild_Moderate	Diseased	RTPCR	N and ORF1b	SARS-CoV-2	Human	Zhuhai	Zou	2020	﻿10.1056/NEJMc2000231	Symptom descriptions in appendix	BB	1	Zou_2020_00231	PatientL	5	5	Exact	Exposure	Ct	36	40	POS	NA	NA	Visual	NA
1	Zou_PatientL00231	7	7	NA	NA	Exact	Exposure	0	NA	NA	NA	Visual	NA	NA	Ct	40	NA	Figure 1	Virus	Upper_respiratory	NA	NA	Mild_Moderate	Diseased	RTPCR	N and ORF1b	SARS-CoV-2	Human	Zhuhai	Zou	2020	﻿10.1056/NEJMc2000231	Symptom descriptions in appendix	BB	1	Zou_2020_00231	PatientL	7	7	Exact	Exposure	Ct	0	40	NEG	NA	NA	Visual	NA
1	Zou_PatientL00231	8	8	NA	NA	Exact	Exposure	4.29583686600433	NA	NA	NA	Visual	NA	NA	Ct	40	NA	Figure 1	Virus	Upper_respiratory	NA	NA	Mild_Moderate	Diseased	RTPCR	N and ORF1b	SARS-CoV-2	Human	Zhuhai	Zou	2020	﻿10.1056/NEJMc2000231	Symptom descriptions in appendix	BB	1	Zou_2020_00231	PatientL	8	8	Exact	Exposure	Ct	27	40	POS	NA	NA	Visual	NA
1	Zou_PatientN00231	12	12	NA	NA	Exact	Exposure	0	NA	NA	NA	Visual	NA	NA	Ct	40	NA	Figure 1	Virus	Upper_respiratory	NA	NA	Mild_Moderate	Diseased	RTPCR	N and ORF1b	SARS-CoV-2	Human	Zhuhai	Zou	2020	﻿10.1056/NEJMc2000231	Symptom descriptions in appendix	BB	1	Zou_2020_00231	PatientN	12	12	Exact	Exposure	Ct	0	40	NEG	NA	NA	Visual	NA
1	Zou_PatientN00231	13	13	NA	NA	Exact	Exposure	0	NA	NA	NA	Visual	NA	NA	Ct	40	NA	Figure 1	Virus	Upper_respiratory	NA	NA	Mild_Moderate	Diseased	RTPCR	N and ORF1b	SARS-CoV-2	Human	Zhuhai	Zou	2020	﻿10.1056/NEJMc2000231	Symptom descriptions in appendix	BB	1	Zou_2020_00231	PatientN	13	13	Exact	Exposure	Ct	0	40	NEG	NA	NA	Visual	NA
1	Zou_PatientN00231	16	16	NA	NA	Exact	Exposure	0	NA	NA	NA	Visual	NA	NA	Ct	40	NA	Figure 1	Virus	Upper_respiratory	NA	NA	Mild_Moderate	Diseased	RTPCR	N and ORF1b	SARS-CoV-2	Human	Zhuhai	Zou	2020	﻿10.1056/NEJMc2000231	Symptom descriptions in appendix	BB	1	Zou_2020_00231	PatientN	16	16	Exact	Exposure	Ct	0	40	NEG	NA	NA	Visual	NA
1	Zou_PatientO00231	1	1	NA	NA	Exact	Exposure	4.55534806148941	NA	NA	NA	Visual	NA	NA	Ct	40	NA	Figure 1	Virus	Upper_respiratory	NA	NA	Mild_Moderate	Diseased	RTPCR	N and ORF1b	SARS-CoV-2	Human	Zhuhai	Zou	2020	﻿10.1056/NEJMc2000231	Symptom descriptions in appendix	BB	1	Zou_2020_00231	PatientO	1	1	Exact	Exposure	Ct	35	40	POS	NA	NA	Visual	NA
1	Zou_PatientO00231	4	4	NA	NA	Exact	Exposure	4.55534806148941	NA	NA	NA	Visual	NA	NA	Ct	40	NA	Figure 1	Virus	Upper_respiratory	NA	NA	Mild_Moderate	Diseased	RTPCR	N and ORF1b	SARS-CoV-2	Human	Zhuhai	Zou	2020	﻿10.1056/NEJMc2000231	Symptom descriptions in appendix	BB	1	Zou_2020_00231	PatientO	4	4	Exact	Exposure	Ct	35	40	POS	NA	NA	Visual	NA
1	Zou_PatientO00231	5	5	NA	NA	Exact	Exposure	4.40119738166216	NA	NA	NA	Visual	NA	NA	Ct	40	NA	Figure 1	Virus	Upper_respiratory	NA	NA	Mild_Moderate	Diseased	RTPCR	N and ORF1b	SARS-CoV-2	Human	Zhuhai	Zou	2020	﻿10.1056/NEJMc2000231	Symptom descriptions in appendix	BB	1	Zou_2020_00231	PatientO	5	5	Exact	Exposure	Ct	30	40	POS	NA	NA	Visual	NA
1	Zou_PatientO00231	7	7	NA	NA	Exact	Exposure	0	NA	NA	NA	Visual	NA	NA	Ct	40	NA	Figure 1	Virus	Upper_respiratory	NA	NA	Mild_Moderate	Diseased	RTPCR	N and ORF1b	SARS-CoV-2	Human	Zhuhai	Zou	2020	﻿10.1056/NEJMc2000231	Symptom descriptions in appendix	BB	1	Zou_2020_00231	PatientO	7	7	Exact	Exposure	Ct	0	40	NEG	NA	NA	Visual	NA
1	Zou_PatientP00231	7	7	NA	NA	Exact	Exposure	4.49650756146648	NA	NA	NA	Visual	NA	NA	Ct	40	NA	Figure 1	Virus	Upper_respiratory	NA	NA	Severe_Critical	Diseased	RTPCR	N and ORF1b	SARS-CoV-2	Human	Zhuhai	Zou	2020	﻿10.1056/NEJMc2000231	Symptom descriptions in appendix	BB	1	Zou_2020_00231	PatientP	7	7	Exact	Exposure	Ct	33	40	POS	NA	NA	Visual	NA
1	Zou_PatientP00231	9	9	NA	NA	Exact	Exposure	0	NA	NA	NA	Visual	NA	NA	Ct	40	NA	Figure 1	Virus	Upper_respiratory	NA	NA	Severe_Critical	Diseased	RTPCR	N and ORF1b	SARS-CoV-2	Human	Zhuhai	Zou	2020	﻿10.1056/NEJMc2000231	Symptom descriptions in appendix	BB	1	Zou_2020_00231	PatientP	9	9	Exact	Exposure	Ct	0	40	NEG	NA	NA	Visual	NA
1	Zou_PatientP00231	10	10	NA	NA	Exact	Exposure	0	NA	NA	NA	Visual	NA	NA	Ct	40	NA	Figure 1	Virus	Upper_respiratory	NA	NA	Severe_Critical	Diseased	RTPCR	N and ORF1b	SARS-CoV-2	Human	Zhuhai	Zou	2020	﻿10.1056/NEJMc2000231	Symptom descriptions in appendix	BB	1	Zou_2020_00231	PatientP	10	10	Exact	Exposure	Ct	0	40	NEG	NA	NA	Visual	NA
1	Zou_PatientP00231	12	12	NA	NA	Exact	Exposure	4.55534806148941	NA	NA	NA	Visual	NA	NA	Ct	40	NA	Figure 1	Virus	Upper_respiratory	NA	NA	Severe_Critical	Diseased	RTPCR	N and ORF1b	SARS-CoV-2	Human	Zhuhai	Zou	2020	﻿10.1056/NEJMc2000231	Symptom descriptions in appendix	BB	1	Zou_2020_00231	PatientP	12	12	Exact	Exposure	Ct	35	40	POS	NA	NA	Visual	NA
1	Zou_PatientP00231	13	13	NA	NA	Exact	Exposure	0	NA	NA	NA	Visual	NA	NA	Ct	40	NA	Figure 1	Virus	Upper_respiratory	NA	NA	Severe_Critical	Diseased	RTPCR	N and ORF1b	SARS-CoV-2	Human	Zhuhai	Zou	2020	﻿10.1056/NEJMc2000231	Symptom descriptions in appendix	BB	1	Zou_2020_00231	PatientP	13	13	Exact	Exposure	Ct	0	40	NEG	NA	NA	Visual	NA
1	Zou_PatientP00231	14	14	NA	NA	Exact	Exposure	4.58351893845611	NA	NA	NA	Visual	NA	NA	Ct	40	NA	Figure 1	Virus	Upper_respiratory	NA	NA	Severe_Critical	Diseased	RTPCR	N and ORF1b	SARS-CoV-2	Human	Zhuhai	Zou	2020	﻿10.1056/NEJMc2000231	Symptom descriptions in appendix	BB	1	Zou_2020_00231	PatientP	14	14	Exact	Exposure	Ct	36	40	POS	NA	NA	Visual	NA
1	Zou_PatientQ00231	7	7	NA	NA	Exact	Exposure	4.49650756146648	NA	NA	NA	Visual	NA	NA	Ct	40	NA	Figure 1	Virus	Upper_respiratory	NA	NA	Mild_Moderate	Diseased	RTPCR	N and ORF1b	SARS-CoV-2	Human	Zhuhai	Zou	2020	﻿10.1056/NEJMc2000231	Symptom descriptions in appendix	BB	1	Zou_2020_00231	PatientQ	7	7	Exact	Exposure	Ct	33	40	POS	NA	NA	Visual	NA
1	Zou_PatientQ00231	8	8	NA	NA	Exact	Exposure	4.58351893845611	NA	NA	NA	Visual	NA	NA	Ct	40	NA	Figure 1	Virus	Upper_respiratory	NA	NA	Mild_Moderate	Diseased	RTPCR	N and ORF1b	SARS-CoV-2	Human	Zhuhai	Zou	2020	﻿10.1056/NEJMc2000231	Symptom descriptions in appendix	BB	1	Zou_2020_00231	PatientQ	8	8	Exact	Exposure	Ct	36	40	POS	NA	NA	Visual	NA
1	Zou_PatientS00231	15	15	NA	NA	Exact	Exposure	4.61091791264422	NA	NA	NA	Visual	NA	NA	Ct	40	NA	Figure 1	Virus	Upper_respiratory	NA	NA	Mild_Moderate	Diseased	RTPCR	N and ORF1b	SARS-CoV-2	Human	Zhuhai	Zou	2020	﻿10.1056/NEJMc2000231	Symptom descriptions in appendix	BB	1	Zou_2020_00231	PatientS	15	15	Exact	Exposure	Ct	37	40	POS	NA	NA	Visual	NA
1	Zou_PatientS00231	17	17	NA	NA	Exact	Exposure	0	NA	NA	NA	Visual	NA	NA	Ct	40	NA	Figure 1	Virus	Upper_respiratory	NA	NA	Mild_Moderate	Diseased	RTPCR	N and ORF1b	SARS-CoV-2	Human	Zhuhai	Zou	2020	﻿10.1056/NEJMc2000231	Symptom descriptions in appendix	BB	1	Zou_2020_00231	PatientS	17	17	Exact	Exposure	Ct	0	40	NEG	NA	NA	Visual	NA
1	Zou_PatientS00231	18	18	NA	NA	Exact	Exposure	0	NA	NA	NA	Visual	NA	NA	Ct	40	NA	Figure 1	Virus	Upper_respiratory	NA	NA	Mild_Moderate	Diseased	RTPCR	N and ORF1b	SARS-CoV-2	Human	Zhuhai	Zou	2020	﻿10.1056/NEJMc2000231	Symptom descriptions in appendix	BB	1	Zou_2020_00231	PatientS	18	18	Exact	Exposure	Ct	0	40	NEG	NA	NA	Visual	NA
1	Zou_PatientS00231	20	20	NA	NA	Exact	Exposure	0	NA	NA	NA	Visual	NA	NA	Ct	40	NA	Figure 1	Virus	Upper_respiratory	NA	NA	Mild_Moderate	Diseased	RTPCR	N and ORF1b	SARS-CoV-2	Human	Zhuhai	Zou	2020	﻿10.1056/NEJMc2000231	Symptom descriptions in appendix	BB	1	Zou_2020_00231	PatientS	20	20	Exact	Exposure	Ct	0	40	NEG	NA	NA	Visual	NA
1	Zou_PatientS00231	21	21	NA	NA	Exact	Exposure	0	NA	NA	NA	Visual	NA	NA	Ct	40	NA	Figure 1	Virus	Upper_respiratory	NA	NA	Mild_Moderate	Diseased	RTPCR	N and ORF1b	SARS-CoV-2	Human	Zhuhai	Zou	2020	﻿10.1056/NEJMc2000231	Symptom descriptions in appendix	BB	1	Zou_2020_00231	PatientS	21	21	Exact	Exposure	Ct	0	40	NEG	NA	NA	Visual	NA
1	Zou_PatientT00231	11	11	NA	NA	Exact	Exposure	0	NA	NA	NA	Visual	NA	NA	Ct	40	NA	Figure 1	Virus	Upper_respiratory	NA	NA	Mild_Moderate	Diseased	RTPCR	N and ORF1b	SARS-CoV-2	Human	Zhuhai	Zou	2020	﻿10.1056/NEJMc2000231	Symptom descriptions in appendix	BB	1	Zou_2020_00231	PatientT	11	11	Exact	Exposure	Ct	0	40	NEG	NA	NA	Visual	NA
1	Zou_PatientW00231	4	4	NA	NA	Exact	Exposure	4.49650756146648	NA	NA	NA	Visual	NA	NA	Ct	40	NA	Figure 1	Virus	Upper_respiratory	NA	NA	Mild_Moderate	Diseased	RTPCR	N and ORF1b	SARS-CoV-2	Human	Zhuhai	Zou	2020	﻿10.1056/NEJMc2000231	Symptom descriptions in appendix	BB	1	Zou_2020_00231	PatientW	4	4	Exact	Exposure	Ct	33	40	POS	NA	NA	Visual	NA
1	Du_125820	56	56	NA	NA	Exact	Symptom onset	4.37622139559198	NA	NA	NA	Exact	NA	NA	Dilution	10	NA	Table 1	IgM	NA	NA	NA	NA	Diseased	NA	NA	SARS-CoV-2	Human	Wuhan Tongji Hospital	Du	2020	10.1002/jmv.25820	NA	SKH	1	Du_2020_25820	1	56	56	Exact	DSSymp	Dilution	29.26	10	POS	NA	NA	Exact	NA
1	Du_225820	41	41	NA	NA	Exact	Symptom onset	4.51779452924597	NA	NA	NA	Exact	NA	NA	Dilution	10	NA	Table 1	IgM	NA	NA	NA	NA	Diseased	NA	NA	SARS-CoV-2	Human	Wuhan Tongji Hospital	Du	2020	10.1002/jmv.25820	NA	SKH	1	Du_2020_25820	2	41	41	Exact	DSSymp	Dilution	33.71	10	POS	NA	NA	Exact	NA
1	Du_325820	54	54	NA	NA	Exact	Symptom onset	3.84316367490938	NA	NA	NA	Exact	NA	NA	Dilution	10	NA	Table 1	IgM	NA	NA	NA	NA	Diseased	NA	NA	SARS-CoV-2	Human	Wuhan Tongji Hospital	Du	2020	10.1002/jmv.25820	NA	SKH	1	Du_2020_25820	3	54	54	Exact	DSSymp	Dilution	17.17	10	POS	NA	NA	Exact	NA
1	Du_425820	45	45	NA	NA	Exact	Symptom onset	5.15166962884137	NA	NA	NA	Exact	NA	NA	Dilution	10	NA	Table 1	IgM	NA	NA	NA	NA	Diseased	NA	NA	SARS-CoV-2	Human	Wuhan Tongji Hospital	Du	2020	10.1002/jmv.25820	NA	SKH	1	Du_2020_25820	4	45	45	Exact	DSSymp	Dilution	63.54	10	POS	NA	NA	Exact	NA
1	Du_525820	47	47	NA	NA	Exact	Symptom onset	3.73176672771953	NA	NA	NA	Exact	NA	NA	Dilution	10	NA	Table 1	IgM	NA	NA	NA	NA	Diseased	NA	NA	SARS-CoV-2	Human	Wuhan Tongji Hospital	Du	2020	10.1002/jmv.25820	NA	SKH	1	Du_2020_25820	5	47	47	Exact	DSSymp	Dilution	15.36	10	POS	NA	NA	Exact	NA
1	Du_625820	56	56	NA	NA	Exact	Symptom onset	4.91222298543081	NA	NA	NA	Exact	NA	NA	Dilution	10	NA	Table 1	IgM	NA	NA	NA	NA	Diseased	NA	NA	SARS-CoV-2	Human	Wuhan Tongji Hospital	Du	2020	10.1002/jmv.25820	NA	SKH	1	Du_2020_25820	6	56	56	Exact	DSSymp	Dilution	50.01	10	POS	NA	NA	Exact	NA
1	Du_725820	39	39	NA	NA	Exact	Symptom onset	5.06491575153129	NA	NA	NA	Exact	NA	NA	Dilution	10	NA	Table 1	IgM	NA	NA	NA	NA	Diseased	NA	NA	SARS-CoV-2	Human	Wuhan Tongji Hospital	Du	2020	10.1002/jmv.25820	NA	SKH	1	Du_2020_25820	7	39	39	Exact	DSSymp	Dilution	58.26	10	POS	NA	NA	Exact	NA
1	Du_825820	52	52	NA	NA	Exact	Symptom onset	4.71868094535073	NA	NA	NA	Exact	NA	NA	Dilution	10	NA	Table 1	IgM	NA	NA	NA	NA	Diseased	NA	NA	SARS-CoV-2	Human	Wuhan Tongji Hospital	Du	2020	10.1002/jmv.25820	NA	SKH	1	Du_2020_25820	8	52	52	Exact	DSSymp	Dilution	41.21	10	POS	NA	NA	Exact	NA
1	Du_925820	33	33	NA	NA	Exact	Symptom onset	3.51850259921652	NA	NA	NA	Exact	NA	NA	Dilution	10	NA	Table 1	IgM	NA	NA	NA	NA	Diseased	NA	NA	SARS-CoV-2	Human	Wuhan Tongji Hospital	Du	2020	10.1002/jmv.25820	NA	SKH	1	Du_2020_25820	9	33	33	Exact	DSSymp	Dilution	12.41	10	POS	NA	NA	Exact	NA
1	Du_1025820	35	35	NA	NA	Exact	Symptom onset	3.60046499042227	NA	NA	NA	Exact	NA	NA	Dilution	10	NA	Table 1	IgM	NA	NA	NA	NA	Diseased	NA	NA	SARS-CoV-2	Human	Wuhan Tongji Hospital	Du	2020	10.1002/jmv.25820	NA	SKH	1	Du_2020_25820	10	35	35	Exact	DSSymp	Dilution	13.47	10	POS	NA	NA	Exact	NA
1	Du_1125820	57	57	NA	NA	Exact	Symptom onset	4.03974915897077	NA	NA	NA	Exact	NA	NA	Dilution	10	NA	Table 1	IgM	NA	NA	NA	NA	Diseased	NA	NA	SARS-CoV-2	Human	Wuhan Tongji Hospital	Du	2020	10.1002/jmv.25820	NA	SKH	1	Du_2020_25820	11	57	57	Exact	DSSymp	Dilution	20.9	10	POS	NA	NA	Exact	NA
1	Du_1225820	31	31	NA	NA	Exact	Symptom onset	3.90799335924598	NA	NA	NA	Exact	NA	NA	Dilution	10	NA	Table 1	IgM	NA	NA	NA	NA	Diseased	NA	NA	SARS-CoV-2	Human	Wuhan Tongji Hospital	Du	2020	10.1002/jmv.25820	NA	SKH	1	Du_2020_25820	12	31	31	Exact	DSSymp	Dilution	18.32	10	POS	NA	NA	Exact	NA
1	Du_1325820	51	51	NA	NA	Exact	Symptom onset	5.60366905986182	NA	NA	NA	Exact	NA	NA	Dilution	10	NA	Table 1	IgM	NA	NA	NA	NA	Diseased	NA	NA	SARS-CoV-2	Human	Wuhan Tongji Hospital	Du	2020	10.1002/jmv.25820	NA	SKH	1	Du_2020_25820	13	51	51	Exact	DSSymp	Dilution	99.85	10	POS	NA	NA	Exact	NA
1	Du_1425820	43	43	NA	NA	Exact	Symptom onset	4.08557297755378	NA	NA	NA	Exact	NA	NA	Dilution	10	NA	Table 1	IgM	NA	NA	NA	NA	Diseased	NA	NA	SARS-CoV-2	Human	Wuhan Tongji Hospital	Du	2020	10.1002/jmv.25820	NA	SKH	1	Du_2020_25820	14	43	43	Exact	DSSymp	Dilution	21.88	10	POS	NA	NA	Exact	NA
1	Du_1525820	52	52	NA	NA	Exact	Symptom onset	5.34172533790036	NA	NA	NA	Exact	NA	NA	Dilution	10	NA	Table 1	IgM	NA	NA	NA	NA	Diseased	NA	NA	SARS-CoV-2	Human	Wuhan Tongji Hospital	Du	2020	10.1002/jmv.25820	NA	SKH	1	Du_2020_25820	15	52	52	Exact	DSSymp	Dilution	76.84	10	POS	NA	NA	Exact	NA
1	Du_1625820	67	67	NA	NA	Exact	Symptom onset	5.81267204131234	NA	NA	NA	Exact	NA	NA	Dilution	10	NA	Table 1	IgM	NA	NA	NA	NA	Diseased	NA	NA	SARS-CoV-2	Human	Wuhan Tongji Hospital	Du	2020	10.1002/jmv.25820	NA	SKH	1	Du_2020_25820	16	67	67	Exact	DSSymp	Dilution	123.06	10	POS	NA	NA	Exact	NA
1	Du_1725820	42	42	NA	NA	Exact	Symptom onset	3.80032547721138	NA	NA	NA	Exact	NA	NA	Dilution	10	NA	Table 1	IgM	NA	NA	NA	NA	Diseased	NA	NA	SARS-CoV-2	Human	Wuhan Tongji Hospital	Du	2020	10.1002/jmv.25820	NA	SKH	1	Du_2020_25820	17	42	42	Exact	DSSymp	Dilution	16.45	10	POS	NA	NA	Exact	NA
1	Du_1825820	41	41	NA	NA	Exact	Symptom onset	5.74693013102592	NA	NA	NA	Exact	NA	NA	Dilution	10	NA	Table 1	IgM	NA	NA	NA	NA	Diseased	NA	NA	SARS-CoV-2	Human	Wuhan Tongji Hospital	Du	2020	10.1002/jmv.25820	NA	SKH	1	Du_2020_25820	18	41	41	Exact	DSSymp	Dilution	115.23	10	POS	NA	NA	Exact	NA
1	Du_1925820	49	49	NA	NA	Exact	Symptom onset	4.59703825044836	NA	NA	NA	Exact	NA	NA	Dilution	10	NA	Table 1	IgM	NA	NA	NA	NA	Diseased	NA	NA	SARS-CoV-2	Human	Wuhan Tongji Hospital	Du	2020	10.1002/jmv.25820	NA	SKH	1	Du_2020_25820	19	49	49	Exact	DSSymp	Dilution	36.49	10	POS	NA	NA	Exact	NA
1	Du_2025820	46	46	NA	NA	Exact	Symptom onset	4.29879544804407	NA	NA	NA	Exact	NA	NA	Dilution	10	NA	Table 1	IgM	NA	NA	NA	NA	Diseased	NA	NA	SARS-CoV-2	Human	Wuhan Tongji Hospital	Du	2020	10.1002/jmv.25820	NA	SKH	1	Du_2020_25820	20	46	46	Exact	DSSymp	Dilution	27.08	10	POS	NA	NA	Exact	NA
1	Du_2125820	51	51	NA	NA	Exact	Symptom onset	6.17201691043186	NA	NA	NA	Exact	NA	NA	Dilution	10	NA	Table 1	IgM	NA	NA	NA	NA	Diseased	NA	NA	SARS-CoV-2	Human	Wuhan Tongji Hospital	Du	2020	10.1002/jmv.25820	NA	SKH	1	Du_2020_25820	21	51	51	Exact	DSSymp	Dilution	176.27	10	POS	NA	NA	Exact	NA
1	Du_2225820	41	41	NA	NA	Exact	Symptom onset	5.41534051370382	NA	NA	NA	Exact	NA	NA	Dilution	10	NA	Table 1	IgM	NA	NA	NA	NA	Diseased	NA	NA	SARS-CoV-2	Human	Wuhan Tongji Hospital	Du	2020	10.1002/jmv.25820	NA	SKH	1	Du_2020_25820	22	41	41	Exact	DSSymp	Dilution	82.71	10	POS	NA	NA	Exact	NA
1	Du_2325820	35	35	NA	NA	Exact	Symptom onset	5.17669230357085	NA	NA	NA	Exact	NA	NA	Dilution	10	NA	Table 1	IgM	NA	NA	NA	NA	Diseased	NA	NA	SARS-CoV-2	Human	Wuhan Tongji Hospital	Du	2020	10.1002/jmv.25820	NA	SKH	1	Du_2020_25820	23	35	35	Exact	DSSymp	Dilution	65.15	10	POS	NA	NA	Exact	NA
1	Du_2425820	45	45	NA	NA	Exact	Symptom onset	4.86786210964238	NA	NA	NA	Exact	NA	NA	Dilution	10	NA	Table 1	IgM	NA	NA	NA	NA	Diseased	NA	NA	SARS-CoV-2	Human	Wuhan Tongji Hospital	Du	2020	10.1002/jmv.25820	NA	SKH	1	Du_2020_25820	24	45	45	Exact	DSSymp	Dilution	47.84	10	POS	NA	NA	Exact	NA
1	Du_2525820	42	42	NA	NA	Exact	Symptom onset	5.15135481693888	NA	NA	NA	Exact	NA	NA	Dilution	10	NA	Table 1	IgM	NA	NA	NA	NA	Diseased	NA	NA	SARS-CoV-2	Human	Wuhan Tongji Hospital	Du	2020	10.1002/jmv.25820	NA	SKH	1	Du_2020_25820	25	42	42	Exact	DSSymp	Dilution	63.52	10	POS	NA	NA	Exact	NA
1	Du_2625820	47	47	NA	NA	Exact	Symptom onset	6.10096338692012	NA	NA	NA	Exact	NA	NA	Dilution	10	NA	Table 1	IgM	NA	NA	NA	NA	Diseased	NA	NA	SARS-CoV-2	Human	Wuhan Tongji Hospital	Du	2020	10.1002/jmv.25820	NA	SKH	1	Du_2020_25820	26	47	47	Exact	DSSymp	Dilution	164.18	10	POS	NA	NA	Exact	NA
1	Du_2725820	49	49	NA	NA	Exact	Symptom onset	6.12420204630118	NA	NA	NA	Exact	NA	NA	Dilution	10	NA	Table 1	IgM	NA	NA	NA	NA	Diseased	NA	NA	SARS-CoV-2	Human	Wuhan Tongji Hospital	Du	2020	10.1002/jmv.25820	NA	SKH	1	Du_2020_25820	27	49	49	Exact	DSSymp	Dilution	168.04	10	POS	NA	NA	Exact	NA
1	Du_2825820	46	46	NA	NA	Exact	Symptom onset	5.59794414089635	NA	NA	NA	Exact	NA	NA	Dilution	10	NA	Table 1	IgM	NA	NA	NA	NA	Diseased	NA	NA	SARS-CoV-2	Human	Wuhan Tongji Hospital	Du	2020	10.1002/jmv.25820	NA	SKH	1	Du_2020_25820	28	46	46	Exact	DSSymp	Dilution	99.28	10	POS	NA	NA	Exact	NA
1	Du_2925820	42	42	NA	NA	Exact	Symptom onset	5.20155336873755	NA	NA	NA	Exact	NA	NA	Dilution	10	NA	Table 1	IgM	NA	NA	NA	NA	Diseased	NA	NA	SARS-CoV-2	Human	Wuhan Tongji Hospital	Du	2020	10.1002/jmv.25820	NA	SKH	1	Du_2020_25820	29	42	42	Exact	DSSymp	Dilution	66.79	10	POS	NA	NA	Exact	NA
1	Du_3025820	34	34	NA	NA	Exact	Symptom onset	4.30064012667084	NA	NA	NA	Exact	NA	NA	Dilution	10	NA	Table 1	IgM	NA	NA	NA	NA	Diseased	NA	NA	SARS-CoV-2	Human	Wuhan Tongji Hospital	Du	2020	10.1002/jmv.25820	NA	SKH	1	Du_2020_25820	30	34	34	Exact	DSSymp	Dilution	27.13	10	POS	NA	NA	Exact	NA
1	Du_3125820	33	33	NA	NA	Exact	Symptom onset	5.00787849107167	NA	NA	NA	Exact	NA	NA	Dilution	10	NA	Table 1	IgM	NA	NA	NA	NA	Diseased	NA	NA	SARS-CoV-2	Human	Wuhan Tongji Hospital	Du	2020	10.1002/jmv.25820	NA	SKH	1	Du_2020_25820	31	33	33	Exact	DSSymp	Dilution	55.03	10	POS	NA	NA	Exact	NA
1	Du_3225820	31	31	NA	NA	Exact	Symptom onset	6.10570302026865	NA	NA	NA	Exact	NA	NA	Dilution	10	NA	Table 1	IgM	NA	NA	NA	NA	Diseased	NA	NA	SARS-CoV-2	Human	Wuhan Tongji Hospital	Du	2020	10.1002/jmv.25820	NA	SKH	1	Du_2020_25820	32	31	31	Exact	DSSymp	Dilution	164.96	10	POS	NA	NA	Exact	NA
1	Du_3325820	39	39	NA	NA	Exact	Symptom onset	5.4322443508345	NA	NA	NA	Exact	NA	NA	Dilution	10	NA	Table 1	IgM	NA	NA	NA	NA	Diseased	NA	NA	SARS-CoV-2	Human	Wuhan Tongji Hospital	Du	2020	10.1002/jmv.25820	NA	SKH	1	Du_2020_25820	33	39	39	Exact	DSSymp	Dilution	84.12	10	POS	NA	NA	Exact	NA
1	Du_3425820	43	43	NA	NA	Exact	Symptom onset	6.66136198099445	NA	NA	NA	Exact	NA	NA	Dilution	10	NA	Table 1	IgM	NA	NA	NA	NA	Diseased	NA	NA	SARS-CoV-2	Human	Wuhan Tongji Hospital	Du	2020	10.1002/jmv.25820	NA	SKH	1	Du_2020_25820	34	43	43	Exact	DSSymp	Dilution	287.54	10	POS	NA	NA	Exact	NA
1	Du_3525820	47	47	NA	NA	Exact	Symptom onset	6.84822907902123	NA	NA	NA	Exact	NA	NA	Dilution	10	NA	Table 1	IgM	NA	NA	NA	NA	Diseased	NA	NA	SARS-CoV-2	Human	Wuhan Tongji Hospital	Du	2020	10.1002/jmv.25820	NA	SKH	1	Du_2020_25820	35	47	47	Exact	DSSymp	Dilution	346.62	10	POS	NA	NA	Exact	NA
1	Du_3625820	41	41	NA	NA	Exact	Symptom onset	6.09730216730683	NA	NA	NA	Exact	NA	NA	Dilution	10	NA	Table 1	IgM	NA	NA	NA	NA	Diseased	NA	NA	SARS-CoV-2	Human	Wuhan Tongji Hospital	Du	2020	10.1002/jmv.25820	NA	SKH	1	Du_2020_25820	36	41	41	Exact	DSSymp	Dilution	163.58	10	POS	NA	NA	Exact	NA
1	Du_3725820	48	48	NA	NA	Exact	Symptom onset	6.01681615317134	NA	NA	NA	Exact	NA	NA	Dilution	10	NA	Table 1	IgM	NA	NA	NA	NA	Diseased	NA	NA	SARS-CoV-2	Human	Wuhan Tongji Hospital	Du	2020	10.1002/jmv.25820	NA	SKH	1	Du_2020_25820	37	48	48	Exact	DSSymp	Dilution	150.93	10	POS	NA	NA	Exact	NA
1	Du_3825820	48	48	NA	NA	Exact	Symptom onset	5.74327858810572	NA	NA	NA	Exact	NA	NA	Dilution	10	NA	Table 1	IgM	NA	NA	NA	NA	Diseased	NA	NA	SARS-CoV-2	Human	Wuhan Tongji Hospital	Du	2020	10.1002/jmv.25820	NA	SKH	1	Du_2020_25820	38	48	48	Exact	DSSymp	Dilution	114.81	10	POS	NA	NA	Exact	NA
1	Du_3925820	42	42	NA	NA	Exact	Symptom onset	6.17213036629765	NA	NA	NA	Exact	NA	NA	Dilution	10	NA	Table 1	IgM	NA	NA	NA	NA	Diseased	NA	NA	SARS-CoV-2	Human	Wuhan Tongji Hospital	Du	2020	10.1002/jmv.25820	NA	SKH	1	Du_2020_25820	39	42	42	Exact	DSSymp	Dilution	176.29	10	POS	NA	NA	Exact	NA
1	Du_4025820	46	46	NA	NA	Exact	Symptom onset	5.99673918890414	NA	NA	NA	Exact	NA	NA	Dilution	10	NA	Table 1	IgM	NA	NA	NA	NA	Diseased	NA	NA	SARS-CoV-2	Human	Wuhan Tongji Hospital	Du	2020	10.1002/jmv.25820	NA	SKH	1	Du_2020_25820	40	46	46	Exact	DSSymp	Dilution	147.93	10	POS	NA	NA	Exact	NA
1	Du_4125820	50	50	NA	NA	Exact	Symptom onset	4.81441017656115	NA	NA	NA	Exact	NA	NA	Dilution	10	NA	Table 1	IgM	NA	NA	NA	NA	Diseased	NA	NA	SARS-CoV-2	Human	Wuhan Tongji Hospital	Du	2020	10.1002/jmv.25820	NA	SKH	1	Du_2020_25820	41	50	50	Exact	DSSymp	Dilution	45.35	10	POS	NA	NA	Exact	NA
1	Du_4225820	48	48	NA	NA	Exact	Symptom onset	5.36105832823768	NA	NA	NA	Exact	NA	NA	Dilution	10	NA	Table 1	IgM	NA	NA	NA	NA	Diseased	NA	NA	SARS-CoV-2	Human	Wuhan Tongji Hospital	Du	2020	10.1002/jmv.25820	NA	SKH	1	Du_2020_25820	42	48	48	Exact	DSSymp	Dilution	78.34	10	POS	NA	NA	Exact	NA
1	Du_4325820	42	42	NA	NA	Exact	Symptom onset	6.72730366969755	NA	NA	NA	Exact	NA	NA	Dilution	10	NA	Table 1	IgM	NA	NA	NA	NA	Diseased	NA	NA	SARS-CoV-2	Human	Wuhan Tongji Hospital	Du	2020	10.1002/jmv.25820	NA	SKH	1	Du_2020_25820	43	42	42	Exact	DSSymp	Dilution	307.14	10	POS	NA	NA	Exact	NA
1	Du_4425820	41	41	NA	NA	Exact	Symptom onset	6.20263211641363	NA	NA	NA	Exact	NA	NA	Dilution	10	NA	Table 1	IgM	NA	NA	NA	NA	Diseased	NA	NA	SARS-CoV-2	Human	Wuhan Tongji Hospital	Du	2020	10.1002/jmv.25820	NA	SKH	1	Du_2020_25820	44	41	41	Exact	DSSymp	Dilution	181.75	10	POS	NA	NA	Exact	NA
1	Du_4525820	40	40	NA	NA	Exact	Symptom onset	4.73002139744511	NA	NA	NA	Exact	NA	NA	Dilution	10	NA	Table 1	IgM	NA	NA	NA	NA	Diseased	NA	NA	SARS-CoV-2	Human	Wuhan Tongji Hospital	Du	2020	10.1002/jmv.25820	NA	SKH	1	Du_2020_25820	45	40	40	Exact	DSSymp	Dilution	41.68	10	POS	NA	NA	Exact	NA
1	Du_4625820	42	42	NA	NA	Exact	Symptom onset	4.00071981506503	NA	NA	NA	Exact	NA	NA	Dilution	10	NA	Table 1	IgM	NA	NA	NA	NA	Diseased	NA	NA	SARS-CoV-2	Human	Wuhan Tongji Hospital	Du	2020	10.1002/jmv.25820	NA	SKH	1	Du_2020_25820	46	42	42	Exact	DSSymp	Dilution	20.1	10	POS	NA	NA	Exact	NA
1	Du_4725820	41	41	NA	NA	Exact	Symptom onset	6.04754564811635	NA	NA	NA	Exact	NA	NA	Dilution	10	NA	Table 1	IgM	NA	NA	NA	NA	Diseased	NA	NA	SARS-CoV-2	Human	Wuhan Tongji Hospital	Du	2020	10.1002/jmv.25820	NA	SKH	1	Du_2020_25820	47	41	41	Exact	DSSymp	Dilution	155.64	10	POS	NA	NA	Exact	NA
1	Du_4825820	10	10	NA	NA	Exact	Symptom onset	0	NA	NA	NA	Exact	NA	NA	Dilution	10	NA	Table 1	IgM	NA	NA	NA	NA	Diseased	NA	NA	SARS-CoV-2	Human	Wuhan Tongji Hospital	Du	2020	10.1002/jmv.25820	NA	SKH	1	Du_2020_25820	48	10	10	Exact	DSSymp	Dilution	0	10	NEG	NA	NA	Exact	NA
1	Du_4925820	42	42	NA	NA	Exact	Symptom onset	0	NA	NA	NA	Exact	NA	NA	Dilution	10	NA	Table 1	IgM	NA	NA	NA	NA	Diseased	NA	NA	SARS-CoV-2	Human	Wuhan Tongji Hospital	Du	2020	10.1002/jmv.25820	NA	SKH	1	Du_2020_25820	49	42	42	Exact	DSSymp	Dilution	0	10	NEG	NA	NA	Exact	NA
1	Du_5025820	38	38	NA	NA	Exact	Symptom onset	0	NA	NA	NA	Exact	NA	NA	Dilution	10	NA	Table 1	IgM	NA	NA	NA	NA	Diseased	NA	NA	SARS-CoV-2	Human	Wuhan Tongji Hospital	Du	2020	10.1002/jmv.25820	NA	SKH	1	Du_2020_25820	50	38	38	Exact	DSSymp	Dilution	0	10	NEG	NA	NA	Exact	NA
1	Du_5125820	42	42	NA	NA	Exact	Symptom onset	0	NA	NA	NA	Exact	NA	NA	Dilution	10	NA	Table 1	IgM	NA	NA	NA	NA	Diseased	NA	NA	SARS-CoV-2	Human	Wuhan Tongji Hospital	Du	2020	10.1002/jmv.25820	NA	SKH	1	Du_2020_25820	51	42	42	Exact	DSSymp	Dilution	0	10	NEG	NA	NA	Exact	NA
1	Du_5225820	38	38	NA	NA	Exact	Symptom onset	0	NA	NA	NA	Exact	NA	NA	Dilution	10	NA	Table 1	IgM	NA	NA	NA	NA	Diseased	NA	NA	SARS-CoV-2	Human	Wuhan Tongji Hospital	Du	2020	10.1002/jmv.25820	NA	SKH	1	Du_2020_25820	52	38	38	Exact	DSSymp	Dilution	0	10	NEG	NA	NA	Exact	NA
1	Du_5325820	39	39	NA	NA	Exact	Symptom onset	0	NA	NA	NA	Exact	NA	NA	Dilution	10	NA	Table 1	IgM	NA	NA	NA	NA	Diseased	NA	NA	SARS-CoV-2	Human	Wuhan Tongji Hospital	Du	2020	10.1002/jmv.25820	NA	SKH	1	Du_2020_25820	53	39	39	Exact	DSSymp	Dilution	0	10	NEG	NA	NA	Exact	NA
1	Du_5425820	51	51	NA	NA	Exact	Symptom onset	0	NA	NA	NA	Exact	NA	NA	Dilution	10	NA	Table 1	IgM	NA	NA	NA	NA	Diseased	NA	NA	SARS-CoV-2	Human	Wuhan Tongji Hospital	Du	2020	10.1002/jmv.25820	NA	SKH	1	Du_2020_25820	54	51	51	Exact	DSSymp	Dilution	0	10	NEG	NA	NA	Exact	NA
1	Du_5525820	60	60	NA	NA	Exact	Symptom onset	0	NA	NA	NA	Exact	NA	NA	Dilution	10	NA	Table 1	IgM	NA	NA	NA	NA	Diseased	NA	NA	SARS-CoV-2	Human	Wuhan Tongji Hospital	Du	2020	10.1002/jmv.25820	NA	SKH	1	Du_2020_25820	55	60	60	Exact	DSSymp	Dilution	0	10	NEG	NA	NA	Exact	NA
1	Du_5625820	44	44	NA	NA	Exact	Symptom onset	0	NA	NA	NA	Exact	NA	NA	Dilution	10	NA	Table 1	IgM	NA	NA	NA	NA	Diseased	NA	NA	SARS-CoV-2	Human	Wuhan Tongji Hospital	Du	2020	10.1002/jmv.25820	NA	SKH	1	Du_2020_25820	56	44	44	Exact	DSSymp	Dilution	0	10	NEG	NA	NA	Exact	NA
1	Du_5725820	43	43	NA	NA	Exact	Symptom onset	0	NA	NA	NA	Exact	NA	NA	Dilution	10	NA	Table 1	IgM	NA	NA	NA	NA	Diseased	NA	NA	SARS-CoV-2	Human	Wuhan Tongji Hospital	Du	2020	10.1002/jmv.25820	NA	SKH	1	Du_2020_25820	57	43	43	Exact	DSSymp	Dilution	0	10	NEG	NA	NA	Exact	NA
1	Du_5825820	51	51	NA	NA	Exact	Symptom onset	0	NA	NA	NA	Exact	NA	NA	Dilution	10	NA	Table 1	IgM	NA	NA	NA	NA	Diseased	NA	NA	SARS-CoV-2	Human	Wuhan Tongji Hospital	Du	2020	10.1002/jmv.25820	NA	SKH	1	Du_2020_25820	58	51	51	Exact	DSSymp	Dilution	0	10	NEG	NA	NA	Exact	NA
1	Du_5925820	41	41	NA	NA	Exact	Symptom onset	0	NA	NA	NA	Exact	NA	NA	Dilution	10	NA	Table 1	IgM	NA	NA	NA	NA	Diseased	NA	NA	SARS-CoV-2	Human	Wuhan Tongji Hospital	Du	2020	10.1002/jmv.25820	NA	SKH	1	Du_2020_25820	59	41	41	Exact	DSSymp	Dilution	0	10	NEG	NA	NA	Exact	NA
1	Du_6025820	48	48	NA	NA	Exact	Symptom onset	0	NA	NA	NA	Exact	NA	NA	Dilution	10	NA	Table 1	IgM	NA	NA	NA	NA	Diseased	NA	NA	SARS-CoV-2	Human	Wuhan Tongji Hospital	Du	2020	10.1002/jmv.25820	NA	SKH	1	Du_2020_25820	60	48	48	Exact	DSSymp	Dilution	0	10	NEG	NA	NA	Exact	NA
1	Du_125820	56	56	NA	NA	Exact	Symptom onset	6.44531394528238	NA	NA	NA	Exact	NA	NA	Dilution	10	NA	Table 1	IgG	NA	NA	NA	NA	Diseased	NA	NA	SARS-CoV-2	Human	Wuhan Tongji Hospital	Du	2020	10.1002/jmv.25820	NA	SKH	1	Du_2020_25820	1	56	56	Exact	DSSymp	Dilution	231.67	10	POS	NA	NA	Exact	NA
1	Du_225820	41	41	NA	NA	Exact	Symptom onset	6.29214837740251	NA	NA	NA	Exact	NA	NA	Dilution	10	NA	Table 1	IgG	NA	NA	NA	NA	Diseased	NA	NA	SARS-CoV-2	Human	Wuhan Tongji Hospital	Du	2020	10.1002/jmv.25820	NA	SKH	1	Du_2020_25820	2	41	41	Exact	DSSymp	Dilution	198.77	10	POS	NA	NA	Exact	NA
1	Du_325820	54	54	NA	NA	Exact	Symptom onset	7.14137051659965	NA	NA	NA	Exact	NA	NA	Dilution	10	NA	Table 1	IgG	NA	NA	NA	NA	Diseased	NA	NA	SARS-CoV-2	Human	Wuhan Tongji Hospital	Du	2020	10.1002/jmv.25820	NA	SKH	1	Du_2020_25820	3	54	54	Exact	DSSymp	Dilution	464.69	10	POS	NA	NA	Exact	NA
1	Du_425820	45	45	NA	NA	Exact	Symptom onset	6.18307485103576	NA	NA	NA	Exact	NA	NA	Dilution	10	NA	Table 1	IgG	NA	NA	NA	NA	Diseased	NA	NA	SARS-CoV-2	Human	Wuhan Tongji Hospital	Du	2020	10.1002/jmv.25820	NA	SKH	1	Du_2020_25820	4	45	45	Exact	DSSymp	Dilution	178.23	10	POS	NA	NA	Exact	NA
1	Du_525820	47	47	NA	NA	Exact	Symptom onset	6.91098632794642	NA	NA	NA	Exact	NA	NA	Dilution	10	NA	Table 1	IgG	NA	NA	NA	NA	Diseased	NA	NA	SARS-CoV-2	Human	Wuhan Tongji Hospital	Du	2020	10.1002/jmv.25820	NA	SKH	1	Du_2020_25820	5	47	47	Exact	DSSymp	Dilution	369.07	10	POS	NA	NA	Exact	NA
1	Du_625820	56	56	NA	NA	Exact	Symptom onset	6.31355074718863	NA	NA	NA	Exact	NA	NA	Dilution	10	NA	Table 1	IgG	NA	NA	NA	NA	Diseased	NA	NA	SARS-CoV-2	Human	Wuhan Tongji Hospital	Du	2020	10.1002/jmv.25820	NA	SKH	1	Du_2020_25820	6	56	56	Exact	DSSymp	Dilution	203.07	10	POS	NA	NA	Exact	NA
1	Du_725820	39	39	NA	NA	Exact	Symptom onset	6.31320597904179	NA	NA	NA	Exact	NA	NA	Dilution	10	NA	Table 1	IgG	NA	NA	NA	NA	Diseased	NA	NA	SARS-CoV-2	Human	Wuhan Tongji Hospital	Du	2020	10.1002/jmv.25820	NA	SKH	1	Du_2020_25820	7	39	39	Exact	DSSymp	Dilution	203	10	POS	NA	NA	Exact	NA
1	Du_825820	52	52	NA	NA	Exact	Symptom onset	7.00598363320718	NA	NA	NA	Exact	NA	NA	Dilution	10	NA	Table 1	IgG	NA	NA	NA	NA	Diseased	NA	NA	SARS-CoV-2	Human	Wuhan Tongji Hospital	Du	2020	10.1002/jmv.25820	NA	SKH	1	Du_2020_25820	8	52	52	Exact	DSSymp	Dilution	405.85	10	POS	NA	NA	Exact	NA
1	Du_925820	33	33	NA	NA	Exact	Symptom onset	6.16495738780274	NA	NA	NA	Exact	NA	NA	Dilution	10	NA	Table 1	IgG	NA	NA	NA	NA	Diseased	NA	NA	SARS-CoV-2	Human	Wuhan Tongji Hospital	Du	2020	10.1002/jmv.25820	NA	SKH	1	Du_2020_25820	9	33	33	Exact	DSSymp	Dilution	175.03	10	POS	NA	NA	Exact	NA
1	Du_1025820	35	35	NA	NA	Exact	Symptom onset	4.45315712059287	NA	NA	NA	Exact	NA	NA	Dilution	10	NA	Table 1	IgG	NA	NA	NA	NA	Diseased	NA	NA	SARS-CoV-2	Human	Wuhan Tongji Hospital	Du	2020	10.1002/jmv.25820	NA	SKH	1	Du_2020_25820	10	35	35	Exact	DSSymp	Dilution	31.6	10	POS	NA	NA	Exact	NA
1	Du_1125820	57	57	NA	NA	Exact	Symptom onset	6.09203093230025	NA	NA	NA	Exact	NA	NA	Dilution	10	NA	Table 1	IgG	NA	NA	NA	NA	Diseased	NA	NA	SARS-CoV-2	Human	Wuhan Tongji Hospital	Du	2020	10.1002/jmv.25820	NA	SKH	1	Du_2020_25820	11	57	57	Exact	DSSymp	Dilution	162.72	10	POS	NA	NA	Exact	NA
1	Du_1225820	31	31	NA	NA	Exact	Symptom onset	6.26217191991168	NA	NA	NA	Exact	NA	NA	Dilution	10	NA	Table 1	IgG	NA	NA	NA	NA	Diseased	NA	NA	SARS-CoV-2	Human	Wuhan Tongji Hospital	Du	2020	10.1002/jmv.25820	NA	SKH	1	Du_2020_25820	12	31	31	Exact	DSSymp	Dilution	192.9	10	POS	NA	NA	Exact	NA
1	Du_1325820	51	51	NA	NA	Exact	Symptom onset	6.39376390069205	NA	NA	NA	Exact	NA	NA	Dilution	10	NA	Table 1	IgG	NA	NA	NA	NA	Diseased	NA	NA	SARS-CoV-2	Human	Wuhan Tongji Hospital	Du	2020	10.1002/jmv.25820	NA	SKH	1	Du_2020_25820	13	51	51	Exact	DSSymp	Dilution	220.03	10	POS	NA	NA	Exact	NA
1	Du_1425820	43	43	NA	NA	Exact	Symptom onset	5.93706051310419	NA	NA	NA	Exact	NA	NA	Dilution	10	NA	Table 1	IgG	NA	NA	NA	NA	Diseased	NA	NA	SARS-CoV-2	Human	Wuhan Tongji Hospital	Du	2020	10.1002/jmv.25820	NA	SKH	1	Du_2020_25820	14	43	43	Exact	DSSymp	Dilution	139.36	10	POS	NA	NA	Exact	NA
1	Du_1525820	52	52	NA	NA	Exact	Symptom onset	6.17959013527924	NA	NA	NA	Exact	NA	NA	Dilution	10	NA	Table 1	IgG	NA	NA	NA	NA	Diseased	NA	NA	SARS-CoV-2	Human	Wuhan Tongji Hospital	Du	2020	10.1002/jmv.25820	NA	SKH	1	Du_2020_25820	15	52	52	Exact	DSSymp	Dilution	177.61	10	POS	NA	NA	Exact	NA
1	Du_1625820	67	67	NA	NA	Exact	Symptom onset	6.08239766032315	NA	NA	NA	Exact	NA	NA	Dilution	10	NA	Table 1	IgG	NA	NA	NA	NA	Diseased	NA	NA	SARS-CoV-2	Human	Wuhan Tongji Hospital	Du	2020	10.1002/jmv.25820	NA	SKH	1	Du_2020_25820	16	67	67	Exact	DSSymp	Dilution	161.16	10	POS	NA	NA	Exact	NA
1	Du_1725820	42	42	NA	NA	Exact	Symptom onset	6.27079199548328	NA	NA	NA	Exact	NA	NA	Dilution	10	NA	Table 1	IgG	NA	NA	NA	NA	Diseased	NA	NA	SARS-CoV-2	Human	Wuhan Tongji Hospital	Du	2020	10.1002/jmv.25820	NA	SKH	1	Du_2020_25820	17	42	42	Exact	DSSymp	Dilution	194.57	10	POS	NA	NA	Exact	NA
1	Du_1825820	41	41	NA	NA	Exact	Symptom onset	6.27197339120843	NA	NA	NA	Exact	NA	NA	Dilution	10	NA	Table 1	IgG	NA	NA	NA	NA	Diseased	NA	NA	SARS-CoV-2	Human	Wuhan Tongji Hospital	Du	2020	10.1002/jmv.25820	NA	SKH	1	Du_2020_25820	18	41	41	Exact	DSSymp	Dilution	194.8	10	POS	NA	NA	Exact	NA
1	Du_1925820	49	49	NA	NA	Exact	Symptom onset	5.57213033190989	NA	NA	NA	Exact	NA	NA	Dilution	10	NA	Table 1	IgG	NA	NA	NA	NA	Diseased	NA	NA	SARS-CoV-2	Human	Wuhan Tongji Hospital	Du	2020	10.1002/jmv.25820	NA	SKH	1	Du_2020_25820	19	49	49	Exact	DSSymp	Dilution	96.75	10	POS	NA	NA	Exact	NA
1	Du_2025820	46	46	NA	NA	Exact	Symptom onset	5.91968891239343	NA	NA	NA	Exact	NA	NA	Dilution	10	NA	Table 1	IgG	NA	NA	NA	NA	Diseased	NA	NA	SARS-CoV-2	Human	Wuhan Tongji Hospital	Du	2020	10.1002/jmv.25820	NA	SKH	1	Du_2020_25820	20	46	46	Exact	DSSymp	Dilution	136.96	10	POS	NA	NA	Exact	NA
1	Du_2125820	51	51	NA	NA	Exact	Symptom onset	6.91188006776514	NA	NA	NA	Exact	NA	NA	Dilution	10	NA	Table 1	IgG	NA	NA	NA	NA	Diseased	NA	NA	SARS-CoV-2	Human	Wuhan Tongji Hospital	Du	2020	10.1002/jmv.25820	NA	SKH	1	Du_2020_25820	21	51	51	Exact	DSSymp	Dilution	369.4	10	POS	NA	NA	Exact	NA
1	Du_2225820	41	41	NA	NA	Exact	Symptom onset	6.18004045895698	NA	NA	NA	Exact	NA	NA	Dilution	10	NA	Table 1	IgG	NA	NA	NA	NA	Diseased	NA	NA	SARS-CoV-2	Human	Wuhan Tongji Hospital	Du	2020	10.1002/jmv.25820	NA	SKH	1	Du_2020_25820	22	41	41	Exact	DSSymp	Dilution	177.69	10	POS	NA	NA	Exact	NA
1	Du_2325820	35	35	NA	NA	Exact	Symptom onset	6.48715928616522	NA	NA	NA	Exact	NA	NA	Dilution	10	NA	Table 1	IgG	NA	NA	NA	NA	Diseased	NA	NA	SARS-CoV-2	Human	Wuhan Tongji Hospital	Du	2020	10.1002/jmv.25820	NA	SKH	1	Du_2020_25820	23	35	35	Exact	DSSymp	Dilution	241.57	10	POS	NA	NA	Exact	NA
1	Du_2425820	45	45	NA	NA	Exact	Symptom onset	6.29986616653789	NA	NA	NA	Exact	NA	NA	Dilution	10	NA	Table 1	IgG	NA	NA	NA	NA	Diseased	NA	NA	SARS-CoV-2	Human	Wuhan Tongji Hospital	Du	2020	10.1002/jmv.25820	NA	SKH	1	Du_2020_25820	24	45	45	Exact	DSSymp	Dilution	200.31	10	POS	NA	NA	Exact	NA
1	Du_2525820	42	42	NA	NA	Exact	Symptom onset	6.10891077003085	NA	NA	NA	Exact	NA	NA	Dilution	10	NA	Table 1	IgG	NA	NA	NA	NA	Diseased	NA	NA	SARS-CoV-2	Human	Wuhan Tongji Hospital	Du	2020	10.1002/jmv.25820	NA	SKH	1	Du_2020_25820	25	42	42	Exact	DSSymp	Dilution	165.49	10	POS	NA	NA	Exact	NA
1	Du_2625820	47	47	NA	NA	Exact	Symptom onset	6.84926714139818	NA	NA	NA	Exact	NA	NA	Dilution	10	NA	Table 1	IgG	NA	NA	NA	NA	Diseased	NA	NA	SARS-CoV-2	Human	Wuhan Tongji Hospital	Du	2020	10.1002/jmv.25820	NA	SKH	1	Du_2020_25820	26	47	47	Exact	DSSymp	Dilution	346.98	10	POS	NA	NA	Exact	NA
1	Du_2725820	49	49	NA	NA	Exact	Symptom onset	6.14662200329584	NA	NA	NA	Exact	NA	NA	Dilution	10	NA	Table 1	IgG	NA	NA	NA	NA	Diseased	NA	NA	SARS-CoV-2	Human	Wuhan Tongji Hospital	Du	2020	10.1002/jmv.25820	NA	SKH	1	Du_2020_25820	27	49	49	Exact	DSSymp	Dilution	171.85	10	POS	NA	NA	Exact	NA
1	Du_2825820	46	46	NA	NA	Exact	Symptom onset	5.92420556609787	NA	NA	NA	Exact	NA	NA	Dilution	10	NA	Table 1	IgG	NA	NA	NA	NA	Diseased	NA	NA	SARS-CoV-2	Human	Wuhan Tongji Hospital	Du	2020	10.1002/jmv.25820	NA	SKH	1	Du_2020_25820	28	46	46	Exact	DSSymp	Dilution	137.58	10	POS	NA	NA	Exact	NA
1	Du_2925820	42	42	NA	NA	Exact	Symptom onset	6.24042338812913	NA	NA	NA	Exact	NA	NA	Dilution	10	NA	Table 1	IgG	NA	NA	NA	NA	Diseased	NA	NA	SARS-CoV-2	Human	Wuhan Tongji Hospital	Du	2020	10.1002/jmv.25820	NA	SKH	1	Du_2020_25820	29	42	42	Exact	DSSymp	Dilution	188.75	10	POS	NA	NA	Exact	NA
1	Du_3025820	34	34	NA	NA	Exact	Symptom onset	6.34147263686196	NA	NA	NA	Exact	NA	NA	Dilution	10	NA	Table 1	IgG	NA	NA	NA	NA	Diseased	NA	NA	SARS-CoV-2	Human	Wuhan Tongji Hospital	Du	2020	10.1002/jmv.25820	NA	SKH	1	Du_2020_25820	30	34	34	Exact	DSSymp	Dilution	208.82	10	POS	NA	NA	Exact	NA
1	Du_3125820	33	33	NA	NA	Exact	Symptom onset	6.228270368236	NA	NA	NA	Exact	NA	NA	Dilution	10	NA	Table 1	IgG	NA	NA	NA	NA	Diseased	NA	NA	SARS-CoV-2	Human	Wuhan Tongji Hospital	Du	2020	10.1002/jmv.25820	NA	SKH	1	Du_2020_25820	31	33	33	Exact	DSSymp	Dilution	186.47	10	POS	NA	NA	Exact	NA
1	Du_3225820	31	31	NA	NA	Exact	Symptom onset	6.19528746622849	NA	NA	NA	Exact	NA	NA	Dilution	10	NA	Table 1	IgG	NA	NA	NA	NA	Diseased	NA	NA	SARS-CoV-2	Human	Wuhan Tongji Hospital	Du	2020	10.1002/jmv.25820	NA	SKH	1	Du_2020_25820	32	31	31	Exact	DSSymp	Dilution	180.42	10	POS	NA	NA	Exact	NA
1	Du_3325820	39	39	NA	NA	Exact	Symptom onset	6.08846015955956	NA	NA	NA	Exact	NA	NA	Dilution	10	NA	Table 1	IgG	NA	NA	NA	NA	Diseased	NA	NA	SARS-CoV-2	Human	Wuhan Tongji Hospital	Du	2020	10.1002/jmv.25820	NA	SKH	1	Du_2020_25820	33	39	39	Exact	DSSymp	Dilution	162.14	10	POS	NA	NA	Exact	NA
1	Du_3425820	43	43	NA	NA	Exact	Symptom onset	6.70294879390762	NA	NA	NA	Exact	NA	NA	Dilution	10	NA	Table 1	IgG	NA	NA	NA	NA	Diseased	NA	NA	SARS-CoV-2	Human	Wuhan Tongji Hospital	Du	2020	10.1002/jmv.25820	NA	SKH	1	Du_2020_25820	34	43	43	Exact	DSSymp	Dilution	299.75	10	POS	NA	NA	Exact	NA
1	Du_3525820	47	47	NA	NA	Exact	Symptom onset	7.86902484562207	NA	NA	NA	Exact	NA	NA	Dilution	10	NA	Table 1	IgG	NA	NA	NA	NA	Diseased	NA	NA	SARS-CoV-2	Human	Wuhan Tongji Hospital	Du	2020	10.1002/jmv.25820	NA	SKH	1	Du_2020_25820	35	47	47	Exact	DSSymp	Dilution	962.01	10	POS	NA	NA	Exact	NA
1	Du_3625820	41	41	NA	NA	Exact	Symptom onset	7.59844090640324	NA	NA	NA	Exact	NA	NA	Dilution	10	NA	Table 1	IgG	NA	NA	NA	NA	Diseased	NA	NA	SARS-CoV-2	Human	Wuhan Tongji Hospital	Du	2020	10.1002/jmv.25820	NA	SKH	1	Du_2020_25820	36	41	41	Exact	DSSymp	Dilution	733.95	10	POS	NA	NA	Exact	NA
1	Du_3725820	48	48	NA	NA	Exact	Symptom onset	6.0656284023903	NA	NA	NA	Exact	NA	NA	Dilution	10	NA	Table 1	IgG	NA	NA	NA	NA	Diseased	NA	NA	SARS-CoV-2	Human	Wuhan Tongji Hospital	Du	2020	10.1002/jmv.25820	NA	SKH	1	Du_2020_25820	37	48	48	Exact	DSSymp	Dilution	158.48	10	POS	NA	NA	Exact	NA
1	Du_3825820	48	48	NA	NA	Exact	Symptom onset	6.82597060842029	NA	NA	NA	Exact	NA	NA	Dilution	10	NA	Table 1	IgG	NA	NA	NA	NA	Diseased	NA	NA	SARS-CoV-2	Human	Wuhan Tongji Hospital	Du	2020	10.1002/jmv.25820	NA	SKH	1	Du_2020_25820	38	48	48	Exact	DSSymp	Dilution	338.99	10	POS	NA	NA	Exact	NA
1	Du_3925820	42	42	NA	NA	Exact	Symptom onset	6.32802178925437	NA	NA	NA	Exact	NA	NA	Dilution	10	NA	Table 1	IgG	NA	NA	NA	NA	Diseased	NA	NA	SARS-CoV-2	Human	Wuhan Tongji Hospital	Du	2020	10.1002/jmv.25820	NA	SKH	1	Du_2020_25820	39	42	42	Exact	DSSymp	Dilution	206.03	10	POS	NA	NA	Exact	NA
1	Du_4025820	46	46	NA	NA	Exact	Symptom onset	7.87237677508032	NA	NA	NA	Exact	NA	NA	Dilution	10	NA	Table 1	IgG	NA	NA	NA	NA	Diseased	NA	NA	SARS-CoV-2	Human	Wuhan Tongji Hospital	Du	2020	10.1002/jmv.25820	NA	SKH	1	Du_2020_25820	40	46	46	Exact	DSSymp	Dilution	965.24	10	POS	NA	NA	Exact	NA
1	Du_4125820	50	50	NA	NA	Exact	Symptom onset	5.9004483350615	NA	NA	NA	Exact	NA	NA	Dilution	10	NA	Table 1	IgG	NA	NA	NA	NA	Diseased	NA	NA	SARS-CoV-2	Human	Wuhan Tongji Hospital	Du	2020	10.1002/jmv.25820	NA	SKH	1	Du_2020_25820	41	50	50	Exact	DSSymp	Dilution	134.35	10	POS	NA	NA	Exact	NA
1	Du_4225820	48	48	NA	NA	Exact	Symptom onset	5.72348641280613	NA	NA	NA	Exact	NA	NA	Dilution	10	NA	Table 1	IgG	NA	NA	NA	NA	Diseased	NA	NA	SARS-CoV-2	Human	Wuhan Tongji Hospital	Du	2020	10.1002/jmv.25820	NA	SKH	1	Du_2020_25820	42	48	48	Exact	DSSymp	Dilution	112.56	10	POS	NA	NA	Exact	NA
1	Du_4325820	42	42	NA	NA	Exact	Symptom onset	7.04196752928109	NA	NA	NA	Exact	NA	NA	Dilution	10	NA	Table 1	IgG	NA	NA	NA	NA	Diseased	NA	NA	SARS-CoV-2	Human	Wuhan Tongji Hospital	Du	2020	10.1002/jmv.25820	NA	SKH	1	Du_2020_25820	43	42	42	Exact	DSSymp	Dilution	420.72	10	POS	NA	NA	Exact	NA
1	Du_4425820	41	41	NA	NA	Exact	Symptom onset	7.9820182391246	NA	NA	NA	Exact	NA	NA	Dilution	10	NA	Table 1	IgG	NA	NA	NA	NA	Diseased	NA	NA	SARS-CoV-2	Human	Wuhan Tongji Hospital	Du	2020	10.1002/jmv.25820	NA	SKH	1	Du_2020_25820	44	41	41	Exact	DSSymp	Dilution	1077.09	10	POS	NA	NA	Exact	NA
1	Du_4525820	40	40	NA	NA	Exact	Symptom onset	6.45129593114512	NA	NA	NA	Exact	NA	NA	Dilution	10	NA	Table 1	IgG	NA	NA	NA	NA	Diseased	NA	NA	SARS-CoV-2	Human	Wuhan Tongji Hospital	Du	2020	10.1002/jmv.25820	NA	SKH	1	Du_2020_25820	45	40	40	Exact	DSSymp	Dilution	233.06	10	POS	NA	NA	Exact	NA
1	Du_4625820	42	42	NA	NA	Exact	Symptom onset	6.09246102662042	NA	NA	NA	Exact	NA	NA	Dilution	10	NA	Table 1	IgG	NA	NA	NA	NA	Diseased	NA	NA	SARS-CoV-2	Human	Wuhan Tongji Hospital	Du	2020	10.1002/jmv.25820	NA	SKH	1	Du_2020_25820	46	42	42	Exact	DSSymp	Dilution	162.79	10	POS	NA	NA	Exact	NA
1	Du_4725820	41	41	NA	NA	Exact	Symptom onset	6.63282338571571	NA	NA	NA	Exact	NA	NA	Dilution	10	NA	Table 1	IgG	NA	NA	NA	NA	Diseased	NA	NA	SARS-CoV-2	Human	Wuhan Tongji Hospital	Du	2020	10.1002/jmv.25820	NA	SKH	1	Du_2020_25820	47	41	41	Exact	DSSymp	Dilution	279.45	10	POS	NA	NA	Exact	NA
1	Du_4825820	10	10	NA	NA	Exact	Symptom onset	6.13709171804881	NA	NA	NA	Exact	NA	NA	Dilution	10	NA	Table 1	IgG	NA	NA	NA	NA	Diseased	NA	NA	SARS-CoV-2	Human	Wuhan Tongji Hospital	Du	2020	10.1002/jmv.25820	NA	SKH	1	Du_2020_25820	48	10	10	Exact	DSSymp	Dilution	170.22	10	POS	NA	NA	Exact	NA
1	Du_4925820	42	42	NA	NA	Exact	Symptom onset	5.29524250458899	NA	NA	NA	Exact	NA	NA	Dilution	10	NA	Table 1	IgG	NA	NA	NA	NA	Diseased	NA	NA	SARS-CoV-2	Human	Wuhan Tongji Hospital	Du	2020	10.1002/jmv.25820	NA	SKH	1	Du_2020_25820	49	42	42	Exact	DSSymp	Dilution	73.35	10	POS	NA	NA	Exact	NA
1	Du_5025820	38	38	NA	NA	Exact	Symptom onset	6.22434784634786	NA	NA	NA	Exact	NA	NA	Dilution	10	NA	Table 1	IgG	NA	NA	NA	NA	Diseased	NA	NA	SARS-CoV-2	Human	Wuhan Tongji Hospital	Du	2020	10.1002/jmv.25820	NA	SKH	1	Du_2020_25820	50	38	38	Exact	DSSymp	Dilution	185.74	10	POS	NA	NA	Exact	NA
1	Du_5125820	42	42	NA	NA	Exact	Symptom onset	5.89140120617256	NA	NA	NA	Exact	NA	NA	Dilution	10	NA	Table 1	IgG	NA	NA	NA	NA	Diseased	NA	NA	SARS-CoV-2	Human	Wuhan Tongji Hospital	Du	2020	10.1002/jmv.25820	NA	SKH	1	Du_2020_25820	51	42	42	Exact	DSSymp	Dilution	133.14	10	POS	NA	NA	Exact	NA
1	Du_5225820	38	38	NA	NA	Exact	Symptom onset	5.79933796506573	NA	NA	NA	Exact	NA	NA	Dilution	10	NA	Table 1	IgG	NA	NA	NA	NA	Diseased	NA	NA	SARS-CoV-2	Human	Wuhan Tongji Hospital	Du	2020	10.1002/jmv.25820	NA	SKH	1	Du_2020_25820	52	38	38	Exact	DSSymp	Dilution	121.43	10	POS	NA	NA	Exact	NA
1	Du_5325820	39	39	NA	NA	Exact	Symptom onset	4.00568260440716	NA	NA	NA	Exact	NA	NA	Dilution	10	NA	Table 1	IgG	NA	NA	NA	NA	Diseased	NA	NA	SARS-CoV-2	Human	Wuhan Tongji Hospital	Du	2020	10.1002/jmv.25820	NA	SKH	1	Du_2020_25820	53	39	39	Exact	DSSymp	Dilution	20.2	10	POS	NA	NA	Exact	NA
1	Du_5425820	51	51	NA	NA	Exact	Symptom onset	6.25546205624161	NA	NA	NA	Exact	NA	NA	Dilution	10	NA	Table 1	IgG	NA	NA	NA	NA	Diseased	NA	NA	SARS-CoV-2	Human	Wuhan Tongji Hospital	Du	2020	10.1002/jmv.25820	NA	SKH	1	Du_2020_25820	54	51	51	Exact	DSSymp	Dilution	191.61	10	POS	NA	NA	Exact	NA
1	Du_5525820	60	60	NA	NA	Exact	Symptom onset	3.71866038021423	NA	NA	NA	Exact	NA	NA	Dilution	10	NA	Table 1	IgG	NA	NA	NA	NA	Diseased	NA	NA	SARS-CoV-2	Human	Wuhan Tongji Hospital	Du	2020	10.1002/jmv.25820	NA	SKH	1	Du_2020_25820	55	60	60	Exact	DSSymp	Dilution	15.16	10	POS	NA	NA	Exact	NA
1	Du_5625820	44	44	NA	NA	Exact	Symptom onset	4.24298290021143	NA	NA	NA	Exact	NA	NA	Dilution	10	NA	Table 1	IgG	NA	NA	NA	NA	Diseased	NA	NA	SARS-CoV-2	Human	Wuhan Tongji Hospital	Du	2020	10.1002/jmv.25820	NA	SKH	1	Du_2020_25820	56	44	44	Exact	DSSymp	Dilution	25.61	10	POS	NA	NA	Exact	NA
1	Du_5725820	43	43	NA	NA	Exact	Symptom onset	6.3627933857324	NA	NA	NA	Exact	NA	NA	Dilution	10	NA	Table 1	IgG	NA	NA	NA	NA	Diseased	NA	NA	SARS-CoV-2	Human	Wuhan Tongji Hospital	Du	2020	10.1002/jmv.25820	NA	SKH	1	Du_2020_25820	57	43	43	Exact	DSSymp	Dilution	213.32	10	POS	NA	NA	Exact	NA
1	Du_5825820	51	51	NA	NA	Exact	Symptom onset	6.21123325964092	NA	NA	NA	Exact	NA	NA	Dilution	10	NA	Table 1	IgG	NA	NA	NA	NA	Diseased	NA	NA	SARS-CoV-2	Human	Wuhan Tongji Hospital	Du	2020	10.1002/jmv.25820	NA	SKH	1	Du_2020_25820	58	51	51	Exact	DSSymp	Dilution	183.32	10	POS	NA	NA	Exact	NA
1	Du_5925820	41	41	NA	NA	Exact	Symptom onset	6.3379226211404	NA	NA	NA	Exact	NA	NA	Dilution	10	NA	Table 1	IgG	NA	NA	NA	NA	Diseased	NA	NA	SARS-CoV-2	Human	Wuhan Tongji Hospital	Du	2020	10.1002/jmv.25820	NA	SKH	1	Du_2020_25820	59	41	41	Exact	DSSymp	Dilution	208.08	10	POS	NA	NA	Exact	NA
1	Du_6025820	48	48	NA	NA	Exact	Symptom onset	6.01595445557386	NA	NA	NA	Exact	NA	NA	Dilution	10	NA	Table 1	IgG	NA	NA	NA	NA	Diseased	NA	NA	SARS-CoV-2	Human	Wuhan Tongji Hospital	Du	2020	10.1002/jmv.25820	NA	SKH	1	Du_2020_25820	60	48	48	Exact	DSSymp	Dilution	150.8	10	POS	NA	NA	Exact	NA
1	Du_3825820	55	55	NA	NA	Exact	Symptom onset	6.34867772588699	NA	NA	NA	Exact	NA	NA	Dilution	10	NA	Table 1	IgG	NA	NA	NA	NA	Diseased	NA	NA	SARS-CoV-2	Human	Wuhan Tongji Hospital	Du	2020	10.1002/jmv.25820	NA	SKH	1	Du_2020_25820	38	55	55	Exact	DSSymp	Dilution	210.33	10	POS	NA	NA	Exact	NA
1	Du_3925820	49	49	NA	NA	Exact	Symptom onset	5.48571074595076	NA	NA	NA	Exact	NA	NA	Dilution	10	NA	Table 1	IgG	NA	NA	NA	NA	Diseased	NA	NA	SARS-CoV-2	Human	Wuhan Tongji Hospital	Du	2020	10.1002/jmv.25820	NA	SKH	1	Du_2020_25820	39	49	49	Exact	DSSymp	Dilution	88.74	10	POS	NA	NA	Exact	NA
1	Du_4025820	53	53	NA	NA	Exact	Symptom onset	6.30499502130128	NA	NA	NA	Exact	NA	NA	Dilution	10	NA	Table 1	IgG	NA	NA	NA	NA	Diseased	NA	NA	SARS-CoV-2	Human	Wuhan Tongji Hospital	Du	2020	10.1002/jmv.25820	NA	SKH	1	Du_2020_25820	40	53	53	Exact	DSSymp	Dilution	201.34	10	POS	NA	NA	Exact	NA
1	Du_4125820	57	57	NA	NA	Exact	Symptom onset	4.91860132078827	NA	NA	NA	Exact	NA	NA	Dilution	10	NA	Table 1	IgG	NA	NA	NA	NA	Diseased	NA	NA	SARS-CoV-2	Human	Wuhan Tongji Hospital	Du	2020	10.1002/jmv.25820	NA	SKH	1	Du_2020_25820	41	57	57	Exact	DSSymp	Dilution	50.33	10	POS	NA	NA	Exact	NA
1	Du_4225820	55	55	NA	NA	Exact	Symptom onset	4.85460573455819	NA	NA	NA	Exact	NA	NA	Dilution	10	NA	Table 1	IgG	NA	NA	NA	NA	Diseased	NA	NA	SARS-CoV-2	Human	Wuhan Tongji Hospital	Du	2020	10.1002/jmv.25820	NA	SKH	1	Du_2020_25820	42	55	55	Exact	DSSymp	Dilution	47.21	10	POS	NA	NA	Exact	NA
1	Du_4325820	50	50	NA	NA	Exact	Symptom onset	5.57532934397707	NA	NA	NA	Exact	NA	NA	Dilution	10	NA	Table 1	IgG	NA	NA	NA	NA	Diseased	NA	NA	SARS-CoV-2	Human	Wuhan Tongji Hospital	Du	2020	10.1002/jmv.25820	NA	SKH	1	Du_2020_25820	43	50	50	Exact	DSSymp	Dilution	97.06	10	POS	NA	NA	Exact	NA
1	Du_4425820	48	48	NA	NA	Exact	Symptom onset	6.48997025077088	NA	NA	NA	Exact	NA	NA	Dilution	10	NA	Table 1	IgG	NA	NA	NA	NA	Diseased	NA	NA	SARS-CoV-2	Human	Wuhan Tongji Hospital	Du	2020	10.1002/jmv.25820	NA	SKH	1	Du_2020_25820	44	48	48	Exact	DSSymp	Dilution	242.25	10	POS	NA	NA	Exact	NA
1	Du_4525820	49	49	NA	NA	Exact	Symptom onset	5.55545459374216	NA	NA	NA	Exact	NA	NA	Dilution	10	NA	Table 1	IgG	NA	NA	NA	NA	Diseased	NA	NA	SARS-CoV-2	Human	Wuhan Tongji Hospital	Du	2020	10.1002/jmv.25820	NA	SKH	1	Du_2020_25820	45	49	49	Exact	DSSymp	Dilution	95.15	10	POS	NA	NA	Exact	NA
1	Du_4625820	49	49	NA	NA	Exact	Symptom onset	5.48503438474811	NA	NA	NA	Exact	NA	NA	Dilution	10	NA	Table 1	IgG	NA	NA	NA	NA	Diseased	NA	NA	SARS-CoV-2	Human	Wuhan Tongji Hospital	Du	2020	10.1002/jmv.25820	NA	SKH	1	Du_2020_25820	46	49	49	Exact	DSSymp	Dilution	88.68	10	POS	NA	NA	Exact	NA
1	Du_4725820	47	47	NA	NA	Exact	Symptom onset	6.30121316966006	NA	NA	NA	Exact	NA	NA	Dilution	10	NA	Table 1	IgG	NA	NA	NA	NA	Diseased	NA	NA	SARS-CoV-2	Human	Wuhan Tongji Hospital	Du	2020	10.1002/jmv.25820	NA	SKH	1	Du_2020_25820	47	47	47	Exact	DSSymp	Dilution	200.58	10	POS	NA	NA	Exact	NA
1	Du_3825820	55	55	NA	NA	Exact	Symptom onset	4.58740028516408	NA	NA	NA	Exact	NA	NA	Dilution	10	NA	Table 1	IgM	NA	NA	NA	NA	Diseased	NA	NA	SARS-CoV-2	Human	Wuhan Tongji Hospital	Du	2020	10.1002/jmv.25820	NA	SKH	1	Du_2020_25820	38	55	55	Exact	DSSymp	Dilution	36.14	10	POS	NA	NA	Exact	NA
1	Du_3925820	49	49	NA	NA	Exact	Symptom onset	4.91621421004661	NA	NA	NA	Exact	NA	NA	Dilution	10	NA	Table 1	IgM	NA	NA	NA	NA	Diseased	NA	NA	SARS-CoV-2	Human	Wuhan Tongji Hospital	Du	2020	10.1002/jmv.25820	NA	SKH	1	Du_2020_25820	39	49	49	Exact	DSSymp	Dilution	50.21	10	POS	NA	NA	Exact	NA
1	Du_4025820	53	53	NA	NA	Exact	Symptom onset	4.69759139471596	NA	NA	NA	Exact	NA	NA	Dilution	10	NA	Table 1	IgM	NA	NA	NA	NA	Diseased	NA	NA	SARS-CoV-2	Human	Wuhan Tongji Hospital	Du	2020	10.1002/jmv.25820	NA	SKH	1	Du_2020_25820	40	53	53	Exact	DSSymp	Dilution	40.35	10	POS	NA	NA	Exact	NA
1	Du_4125820	57	57	NA	NA	Exact	Symptom onset	3.60564826748413	NA	NA	NA	Exact	NA	NA	Dilution	10	NA	Table 1	IgM	NA	NA	NA	NA	Diseased	NA	NA	SARS-CoV-2	Human	Wuhan Tongji Hospital	Du	2020	10.1002/jmv.25820	NA	SKH	1	Du_2020_25820	41	57	57	Exact	DSSymp	Dilution	13.54	10	POS	NA	NA	Exact	NA
1	Du_4225820	55	55	NA	NA	Exact	Symptom onset	4.06152001409199	NA	NA	NA	Exact	NA	NA	Dilution	10	NA	Table 1	IgM	NA	NA	NA	NA	Diseased	NA	NA	SARS-CoV-2	Human	Wuhan Tongji Hospital	Du	2020	10.1002/jmv.25820	NA	SKH	1	Du_2020_25820	42	55	55	Exact	DSSymp	Dilution	21.36	10	POS	NA	NA	Exact	NA
1	Du_4325820	50	50	NA	NA	Exact	Symptom onset	5.39185319549162	NA	NA	NA	Exact	NA	NA	Dilution	10	NA	Table 1	IgM	NA	NA	NA	NA	Diseased	NA	NA	SARS-CoV-2	Human	Wuhan Tongji Hospital	Du	2020	10.1002/jmv.25820	NA	SKH	1	Du_2020_25820	43	50	50	Exact	DSSymp	Dilution	80.79	10	POS	NA	NA	Exact	NA
1	Du_4425820	48	48	NA	NA	Exact	Symptom onset	4.85078569595696	NA	NA	NA	Exact	NA	NA	Dilution	10	NA	Table 1	IgM	NA	NA	NA	NA	Diseased	NA	NA	SARS-CoV-2	Human	Wuhan Tongji Hospital	Du	2020	10.1002/jmv.25820	NA	SKH	1	Du_2020_25820	44	48	48	Exact	DSSymp	Dilution	47.03	10	POS	NA	NA	Exact	NA
1	Du_4525820	49	49	NA	NA	Exact	Symptom onset	3.51446545202954	NA	NA	NA	Exact	NA	NA	Dilution	10	NA	Table 1	IgM	NA	NA	NA	NA	Diseased	NA	NA	SARS-CoV-2	Human	Wuhan Tongji Hospital	Du	2020	10.1002/jmv.25820	NA	SKH	1	Du_2020_25820	45	49	49	Exact	DSSymp	Dilution	12.36	10	POS	NA	NA	Exact	NA
1	Du_4625820	49	49	NA	NA	Exact	Symptom onset	0	NA	NA	NA	Exact	NA	NA	Dilution	10	NA	Table 1	IgM	NA	NA	NA	NA	Diseased	NA	NA	SARS-CoV-2	Human	Wuhan Tongji Hospital	Du	2020	10.1002/jmv.25820	NA	SKH	1	Du_2020_25820	46	49	49	Exact	DSSymp	Dilution	0	10	NEG	NA	NA	Exact	NA
1	Du_4725820	47	47	NA	NA	Exact	Symptom onset	4.88135759111726	NA	NA	NA	Exact	NA	NA	Dilution	10	NA	Table 1	IgM	NA	NA	NA	NA	Diseased	NA	NA	SARS-CoV-2	Human	Wuhan Tongji Hospital	Du	2020	10.1002/jmv.25820	NA	SKH	1	Du_2020_25820	47	47	47	Exact	DSSymp	Dilution	48.49	10	POS	NA	NA	Exact	NA
1	Du_Patient125820	56	56	NA	NA	Exact	Symptom onset	4.37622139559198	NA	NA	NA	Exact	NA	NA	AU	10	NA	NA	IgM	Serum_Plasma	NA	NA	NA	Diseased	NA	NA	SARS-CoV-2	Human	Wuhan Tongji Hospital	Du	2020	10.1002/jmv.25820	NA	SH	1	Du_2020_25820	Patient1	56	56	NA	Exact	AU/mL	29.26	10	POS	NA	NA	Exact	NA
1	Du_Patient225820	41	41	NA	NA	Exact	Symptom onset	4.51779452924597	NA	NA	NA	Exact	NA	NA	AU	10	NA	NA	IgM	Serum_Plasma	NA	NA	NA	Diseased	NA	NA	SARS-CoV-2	Human	Wuhan Tongji Hospital	Du	2020	10.1002/jmv.25820	NA	SH	1	Du_2020_25820	Patient2	41	41	NA	Exact	AU/mL	33.71	10	POS	NA	NA	Exact	NA
1	Du_Patient325820	54	54	NA	NA	Exact	Symptom onset	3.84316367490938	NA	NA	NA	Exact	NA	NA	AU	10	NA	NA	IgM	Serum_Plasma	NA	NA	NA	Diseased	NA	NA	SARS-CoV-2	Human	Wuhan Tongji Hospital	Du	2020	10.1002/jmv.25820	NA	SH	1	Du_2020_25820	Patient3	54	54	NA	Exact	AU/mL	17.17	10	POS	NA	NA	Exact	NA
1	Du_Patient425820	45	45	NA	NA	Exact	Symptom onset	5.15166962884137	NA	NA	NA	Exact	NA	NA	AU	10	NA	NA	IgM	Serum_Plasma	NA	NA	NA	Diseased	NA	NA	SARS-CoV-2	Human	Wuhan Tongji Hospital	Du	2020	10.1002/jmv.25820	NA	SH	1	Du_2020_25820	Patient4	45	45	NA	Exact	AU/mL	63.54	10	POS	NA	NA	Exact	NA
1	Du_Patient525820	47	47	NA	NA	Exact	Symptom onset	3.73176672771953	NA	NA	NA	Exact	NA	NA	AU	10	NA	NA	IgM	Serum_Plasma	NA	NA	NA	Diseased	NA	NA	SARS-CoV-2	Human	Wuhan Tongji Hospital	Du	2020	10.1002/jmv.25820	NA	SH	1	Du_2020_25820	Patient5	47	47	NA	Exact	AU/mL	15.36	10	POS	NA	NA	Exact	NA
1	Du_Patient625820	56	56	NA	NA	Exact	Symptom onset	4.91222298543081	NA	NA	NA	Exact	NA	NA	AU	10	NA	NA	IgM	Serum_Plasma	NA	NA	NA	Diseased	NA	NA	SARS-CoV-2	Human	Wuhan Tongji Hospital	Du	2020	10.1002/jmv.25820	NA	SH	1	Du_2020_25820	Patient6	56	56	NA	Exact	AU/mL	50.01	10	POS	NA	NA	Exact	NA
1	Du_Patient725820	39	39	NA	NA	Exact	Symptom onset	5.06491575153129	NA	NA	NA	Exact	NA	NA	AU	10	NA	NA	IgM	Serum_Plasma	NA	NA	NA	Diseased	NA	NA	SARS-CoV-2	Human	Wuhan Tongji Hospital	Du	2020	10.1002/jmv.25820	NA	SH	1	Du_2020_25820	Patient7	39	39	NA	Exact	AU/mL	58.26	10	POS	NA	NA	Exact	NA
1	Du_Patient825820	52	52	NA	NA	Exact	Symptom onset	4.71868094535073	NA	NA	NA	Exact	NA	NA	AU	10	NA	NA	IgM	Serum_Plasma	NA	NA	NA	Diseased	NA	NA	SARS-CoV-2	Human	Wuhan Tongji Hospital	Du	2020	10.1002/jmv.25820	NA	SH	1	Du_2020_25820	Patient8	52	52	NA	Exact	AU/mL	41.21	10	POS	NA	NA	Exact	NA
1	Du_Patient925820	33	33	NA	NA	Exact	Symptom onset	3.51850259921652	NA	NA	NA	Exact	NA	NA	AU	10	NA	NA	IgM	Serum_Plasma	NA	NA	NA	Diseased	NA	NA	SARS-CoV-2	Human	Wuhan Tongji Hospital	Du	2020	10.1002/jmv.25820	NA	SH	1	Du_2020_25820	Patient9	33	33	NA	Exact	AU/mL	12.41	10	POS	NA	NA	Exact	NA
1	Du_Patient1025820	35	35	NA	NA	Exact	Symptom onset	3.60046499042227	NA	NA	NA	Exact	NA	NA	AU	10	NA	NA	IgM	Serum_Plasma	NA	NA	NA	Diseased	NA	NA	SARS-CoV-2	Human	Wuhan Tongji Hospital	Du	2020	10.1002/jmv.25820	NA	SH	1	Du_2020_25820	Patient10	35	35	NA	Exact	AU/mL	13.47	10	POS	NA	NA	Exact	NA
1	Du_Patient1125820	57	57	NA	NA	Exact	Symptom onset	4.03974915897077	NA	NA	NA	Exact	NA	NA	AU	10	NA	NA	IgM	Serum_Plasma	NA	NA	NA	Diseased	NA	NA	SARS-CoV-2	Human	Wuhan Tongji Hospital	Du	2020	10.1002/jmv.25820	NA	SH	1	Du_2020_25820	Patient11	57	57	NA	Exact	AU/mL	20.9	10	POS	NA	NA	Exact	NA
1	Du_Patient1225820	31	31	NA	NA	Exact	Symptom onset	3.90799335924598	NA	NA	NA	Exact	NA	NA	AU	10	NA	NA	IgM	Serum_Plasma	NA	NA	NA	Diseased	NA	NA	SARS-CoV-2	Human	Wuhan Tongji Hospital	Du	2020	10.1002/jmv.25820	NA	SH	1	Du_2020_25820	Patient12	31	31	NA	Exact	AU/mL	18.32	10	POS	NA	NA	Exact	NA
1	Du_Patient1325820	51	51	NA	NA	Exact	Symptom onset	5.60366905986182	NA	NA	NA	Exact	NA	NA	AU	10	NA	NA	IgM	Serum_Plasma	NA	NA	NA	Diseased	NA	NA	SARS-CoV-2	Human	Wuhan Tongji Hospital	Du	2020	10.1002/jmv.25820	NA	SH	1	Du_2020_25820	Patient13	51	51	NA	Exact	AU/mL	99.85	10	POS	NA	NA	Exact	NA
1	Du_Patient1425820	43	43	NA	NA	Exact	Symptom onset	4.08557297755378	NA	NA	NA	Exact	NA	NA	AU	10	NA	NA	IgM	Serum_Plasma	NA	NA	NA	Diseased	NA	NA	SARS-CoV-2	Human	Wuhan Tongji Hospital	Du	2020	10.1002/jmv.25820	NA	SH	1	Du_2020_25820	Patient14	43	43	NA	Exact	AU/mL	21.88	10	POS	NA	NA	Exact	NA
1	Du_Patient1525820	52	52	NA	NA	Exact	Symptom onset	5.34172533790036	NA	NA	NA	Exact	NA	NA	AU	10	NA	NA	IgM	Serum_Plasma	NA	NA	NA	Diseased	NA	NA	SARS-CoV-2	Human	Wuhan Tongji Hospital	Du	2020	10.1002/jmv.25820	NA	SH	1	Du_2020_25820	Patient15	52	52	NA	Exact	AU/mL	76.84	10	POS	NA	NA	Exact	NA
1	Du_Patient1625820	67	67	NA	NA	Exact	Symptom onset	5.81267204131234	NA	NA	NA	Exact	NA	NA	AU	10	NA	NA	IgM	Serum_Plasma	NA	NA	NA	Diseased	NA	NA	SARS-CoV-2	Human	Wuhan Tongji Hospital	Du	2020	10.1002/jmv.25820	NA	SH	1	Du_2020_25820	Patient16	67	67	NA	Exact	AU/mL	123.06	10	POS	NA	NA	Exact	NA
1	Du_Patient1725820	42	42	NA	NA	Exact	Symptom onset	3.80032547721138	NA	NA	NA	Exact	NA	NA	AU	10	NA	NA	IgM	Serum_Plasma	NA	NA	NA	Diseased	NA	NA	SARS-CoV-2	Human	Wuhan Tongji Hospital	Du	2020	10.1002/jmv.25820	NA	SH	1	Du_2020_25820	Patient17	42	42	NA	Exact	AU/mL	16.45	10	POS	NA	NA	Exact	NA
1	Du_Patient1825820	41	41	NA	NA	Exact	Symptom onset	5.74693013102592	NA	NA	NA	Exact	NA	NA	AU	10	NA	NA	IgM	Serum_Plasma	NA	NA	NA	Diseased	NA	NA	SARS-CoV-2	Human	Wuhan Tongji Hospital	Du	2020	10.1002/jmv.25820	NA	SH	1	Du_2020_25820	Patient18	41	41	NA	Exact	AU/mL	115.23	10	POS	NA	NA	Exact	NA
1	Du_Patient1925820	49	49	NA	NA	Exact	Symptom onset	4.59703825044836	NA	NA	NA	Exact	NA	NA	AU	10	NA	NA	IgM	Serum_Plasma	NA	NA	NA	Diseased	NA	NA	SARS-CoV-2	Human	Wuhan Tongji Hospital	Du	2020	10.1002/jmv.25820	NA	SH	1	Du_2020_25820	Patient19	49	49	NA	Exact	AU/mL	36.49	10	POS	NA	NA	Exact	NA
1	Du_Patient2025820	46	46	NA	NA	Exact	Symptom onset	4.29879544804407	NA	NA	NA	Exact	NA	NA	AU	10	NA	NA	IgM	Serum_Plasma	NA	NA	NA	Diseased	NA	NA	SARS-CoV-2	Human	Wuhan Tongji Hospital	Du	2020	10.1002/jmv.25820	NA	SH	1	Du_2020_25820	Patient20	46	46	NA	Exact	AU/mL	27.08	10	POS	NA	NA	Exact	NA
1	Du_Patient2125820	51	51	NA	NA	Exact	Symptom onset	6.17201691043186	NA	NA	NA	Exact	NA	NA	AU	10	NA	NA	IgM	Serum_Plasma	NA	NA	NA	Diseased	NA	NA	SARS-CoV-2	Human	Wuhan Tongji Hospital	Du	2020	10.1002/jmv.25820	NA	SH	1	Du_2020_25820	Patient21	51	51	NA	Exact	AU/mL	176.27	10	POS	NA	NA	Exact	NA
1	Du_Patient2225820	41	41	NA	NA	Exact	Symptom onset	5.41534051370382	NA	NA	NA	Exact	NA	NA	AU	10	NA	NA	IgM	Serum_Plasma	NA	NA	NA	Diseased	NA	NA	SARS-CoV-2	Human	Wuhan Tongji Hospital	Du	2020	10.1002/jmv.25820	NA	SH	1	Du_2020_25820	Patient22	41	41	NA	Exact	AU/mL	82.71	10	POS	NA	NA	Exact	NA
1	Du_Patient2325820	35	35	NA	NA	Exact	Symptom onset	5.17669230357085	NA	NA	NA	Exact	NA	NA	AU	10	NA	NA	IgM	Serum_Plasma	NA	NA	NA	Diseased	NA	NA	SARS-CoV-2	Human	Wuhan Tongji Hospital	Du	2020	10.1002/jmv.25820	NA	SH	1	Du_2020_25820	Patient23	35	35	NA	Exact	AU/mL	65.15	10	POS	NA	NA	Exact	NA
1	Du_Patient2425820	45	45	NA	NA	Exact	Symptom onset	4.86786210964238	NA	NA	NA	Exact	NA	NA	AU	10	NA	NA	IgM	Serum_Plasma	NA	NA	NA	Diseased	NA	NA	SARS-CoV-2	Human	Wuhan Tongji Hospital	Du	2020	10.1002/jmv.25820	NA	SH	1	Du_2020_25820	Patient24	45	45	NA	Exact	AU/mL	47.84	10	POS	NA	NA	Exact	NA
1	Du_Patient2525820	42	42	NA	NA	Exact	Symptom onset	5.15135481693888	NA	NA	NA	Exact	NA	NA	AU	10	NA	NA	IgM	Serum_Plasma	NA	NA	NA	Diseased	NA	NA	SARS-CoV-2	Human	Wuhan Tongji Hospital	Du	2020	10.1002/jmv.25820	NA	SH	1	Du_2020_25820	Patient25	42	42	NA	Exact	AU/mL	63.52	10	POS	NA	NA	Exact	NA
1	Du_Patient2625820	47	47	NA	NA	Exact	Symptom onset	6.10096338692012	NA	NA	NA	Exact	NA	NA	AU	10	NA	NA	IgM	Serum_Plasma	NA	NA	NA	Diseased	NA	NA	SARS-CoV-2	Human	Wuhan Tongji Hospital	Du	2020	10.1002/jmv.25820	NA	SH	1	Du_2020_25820	Patient26	47	47	NA	Exact	AU/mL	164.18	10	POS	NA	NA	Exact	NA
1	Du_Patient2725820	49	49	NA	NA	Exact	Symptom onset	6.12420204630118	NA	NA	NA	Exact	NA	NA	AU	10	NA	NA	IgM	Serum_Plasma	NA	NA	NA	Diseased	NA	NA	SARS-CoV-2	Human	Wuhan Tongji Hospital	Du	2020	10.1002/jmv.25820	NA	SH	1	Du_2020_25820	Patient27	49	49	NA	Exact	AU/mL	168.04	10	POS	NA	NA	Exact	NA
1	Du_Patient2825820	46	46	NA	NA	Exact	Symptom onset	5.59794414089635	NA	NA	NA	Exact	NA	NA	AU	10	NA	NA	IgM	Serum_Plasma	NA	NA	NA	Diseased	NA	NA	SARS-CoV-2	Human	Wuhan Tongji Hospital	Du	2020	10.1002/jmv.25820	NA	SH	1	Du_2020_25820	Patient28	46	46	NA	Exact	AU/mL	99.28	10	POS	NA	NA	Exact	NA
1	Du_Patient2925820	42	42	NA	NA	Exact	Symptom onset	5.20155336873755	NA	NA	NA	Exact	NA	NA	AU	10	NA	NA	IgM	Serum_Plasma	NA	NA	NA	Diseased	NA	NA	SARS-CoV-2	Human	Wuhan Tongji Hospital	Du	2020	10.1002/jmv.25820	NA	SH	1	Du_2020_25820	Patient29	42	42	NA	Exact	AU/mL	66.79	10	POS	NA	NA	Exact	NA
1	Du_Patient3025820	34	34	NA	NA	Exact	Symptom onset	4.30064012667084	NA	NA	NA	Exact	NA	NA	AU	10	NA	NA	IgM	Serum_Plasma	NA	NA	NA	Diseased	NA	NA	SARS-CoV-2	Human	Wuhan Tongji Hospital	Du	2020	10.1002/jmv.25820	NA	SH	1	Du_2020_25820	Patient30	34	34	NA	Exact	AU/mL	27.13	10	POS	NA	NA	Exact	NA
1	Du_Patient3125820	33	33	NA	NA	Exact	Symptom onset	5.00787849107167	NA	NA	NA	Exact	NA	NA	AU	10	NA	NA	IgM	Serum_Plasma	NA	NA	NA	Diseased	NA	NA	SARS-CoV-2	Human	Wuhan Tongji Hospital	Du	2020	10.1002/jmv.25820	NA	SH	1	Du_2020_25820	Patient31	33	33	NA	Exact	AU/mL	55.03	10	POS	NA	NA	Exact	NA
1	Du_Patient3225820	31	31	NA	NA	Exact	Symptom onset	6.10570302026865	NA	NA	NA	Exact	NA	NA	AU	10	NA	NA	IgM	Serum_Plasma	NA	NA	NA	Diseased	NA	NA	SARS-CoV-2	Human	Wuhan Tongji Hospital	Du	2020	10.1002/jmv.25820	NA	SH	1	Du_2020_25820	Patient32	31	31	NA	Exact	AU/mL	164.96	10	POS	NA	NA	Exact	NA
1	Du_Patient3325820	39	39	NA	NA	Exact	Symptom onset	5.4322443508345	NA	NA	NA	Exact	NA	NA	AU	10	NA	NA	IgM	Serum_Plasma	NA	NA	NA	Diseased	NA	NA	SARS-CoV-2	Human	Wuhan Tongji Hospital	Du	2020	10.1002/jmv.25820	NA	SH	1	Du_2020_25820	Patient33	39	39	NA	Exact	AU/mL	84.12	10	POS	NA	NA	Exact	NA
1	Du_Patient3425820	43	43	NA	NA	Exact	Symptom onset	6.66136198099445	NA	NA	NA	Exact	NA	NA	AU	10	NA	NA	IgM	Serum_Plasma	NA	NA	NA	Diseased	NA	NA	SARS-CoV-2	Human	Wuhan Tongji Hospital	Du	2020	10.1002/jmv.25820	NA	SH	1	Du_2020_25820	Patient34	43	43	NA	Exact	AU/mL	287.54	10	POS	NA	NA	Exact	NA
1	Du_Patient3525820	47	47	NA	NA	Exact	Symptom onset	6.84822907902123	NA	NA	NA	Exact	NA	NA	AU	10	NA	NA	IgM	Serum_Plasma	NA	NA	NA	Diseased	NA	NA	SARS-CoV-2	Human	Wuhan Tongji Hospital	Du	2020	10.1002/jmv.25820	NA	SH	1	Du_2020_25820	Patient35	47	47	NA	Exact	AU/mL	346.62	10	POS	NA	NA	Exact	NA
1	Du_Patient3625820	41	41	NA	NA	Exact	Symptom onset	6.09730216730683	NA	NA	NA	Exact	NA	NA	AU	10	NA	NA	IgM	Serum_Plasma	NA	NA	NA	Diseased	NA	NA	SARS-CoV-2	Human	Wuhan Tongji Hospital	Du	2020	10.1002/jmv.25820	NA	SH	1	Du_2020_25820	Patient36	41	41	NA	Exact	AU/mL	163.58	10	POS	NA	NA	Exact	NA
1	Du_Patient3725820	48	48	NA	NA	Exact	Symptom onset	6.01681615317134	NA	NA	NA	Exact	NA	NA	AU	10	NA	NA	IgM	Serum_Plasma	NA	NA	NA	Diseased	NA	NA	SARS-CoV-2	Human	Wuhan Tongji Hospital	Du	2020	10.1002/jmv.25820	NA	SH	1	Du_2020_25820	Patient37	48	48	NA	Exact	AU/mL	150.93	10	POS	NA	NA	Exact	NA
1	Du_Patient3825820	48	48	NA	NA	Exact	Symptom onset	5.74327858810572	NA	NA	NA	Exact	NA	NA	AU	10	NA	NA	IgM	Serum_Plasma	NA	NA	NA	Diseased	NA	NA	SARS-CoV-2	Human	Wuhan Tongji Hospital	Du	2020	10.1002/jmv.25820	NA	SH	1	Du_2020_25820	Patient38	48	48	NA	Exact	AU/mL	114.81	10	POS	NA	NA	Exact	NA
1	Du_Patient3925820	42	42	NA	NA	Exact	Symptom onset	6.17213036629765	NA	NA	NA	Exact	NA	NA	AU	10	NA	NA	IgM	Serum_Plasma	NA	NA	NA	Diseased	NA	NA	SARS-CoV-2	Human	Wuhan Tongji Hospital	Du	2020	10.1002/jmv.25820	NA	SH	1	Du_2020_25820	Patient39	42	42	NA	Exact	AU/mL	176.29	10	POS	NA	NA	Exact	NA
1	Du_Patient4025820	46	46	NA	NA	Exact	Symptom onset	5.99673918890414	NA	NA	NA	Exact	NA	NA	AU	10	NA	NA	IgM	Serum_Plasma	NA	NA	NA	Diseased	NA	NA	SARS-CoV-2	Human	Wuhan Tongji Hospital	Du	2020	10.1002/jmv.25820	NA	SH	1	Du_2020_25820	Patient40	46	46	NA	Exact	AU/mL	147.93	10	POS	NA	NA	Exact	NA
1	Du_Patient4125820	50	50	NA	NA	Exact	Symptom onset	4.81441017656115	NA	NA	NA	Exact	NA	NA	AU	10	NA	NA	IgM	Serum_Plasma	NA	NA	NA	Diseased	NA	NA	SARS-CoV-2	Human	Wuhan Tongji Hospital	Du	2020	10.1002/jmv.25820	NA	SH	1	Du_2020_25820	Patient41	50	50	NA	Exact	AU/mL	45.35	10	POS	NA	NA	Exact	NA
1	Du_Patient4225820	48	48	NA	NA	Exact	Symptom onset	5.36105832823768	NA	NA	NA	Exact	NA	NA	AU	10	NA	NA	IgM	Serum_Plasma	NA	NA	NA	Diseased	NA	NA	SARS-CoV-2	Human	Wuhan Tongji Hospital	Du	2020	10.1002/jmv.25820	NA	SH	1	Du_2020_25820	Patient42	48	48	NA	Exact	AU/mL	78.34	10	POS	NA	NA	Exact	NA
1	Du_Patient4325820	42	42	NA	NA	Exact	Symptom onset	6.72730366969755	NA	NA	NA	Exact	NA	NA	AU	10	NA	NA	IgM	Serum_Plasma	NA	NA	NA	Diseased	NA	NA	SARS-CoV-2	Human	Wuhan Tongji Hospital	Du	2020	10.1002/jmv.25820	NA	SH	1	Du_2020_25820	Patient43	42	42	NA	Exact	AU/mL	307.14	10	POS	NA	NA	Exact	NA
1	Du_Patient4425820	41	41	NA	NA	Exact	Symptom onset	6.20263211641363	NA	NA	NA	Exact	NA	NA	AU	10	NA	NA	IgM	Serum_Plasma	NA	NA	NA	Diseased	NA	NA	SARS-CoV-2	Human	Wuhan Tongji Hospital	Du	2020	10.1002/jmv.25820	NA	SH	1	Du_2020_25820	Patient44	41	41	NA	Exact	AU/mL	181.75	10	POS	NA	NA	Exact	NA
1	Du_Patient4525820	40	40	NA	NA	Exact	Symptom onset	4.73002139744511	NA	NA	NA	Exact	NA	NA	AU	10	NA	NA	IgM	Serum_Plasma	NA	NA	NA	Diseased	NA	NA	SARS-CoV-2	Human	Wuhan Tongji Hospital	Du	2020	10.1002/jmv.25820	NA	SH	1	Du_2020_25820	Patient45	40	40	NA	Exact	AU/mL	41.68	10	POS	NA	NA	Exact	NA
1	Du_Patient4625820	42	42	NA	NA	Exact	Symptom onset	4.00071981506503	NA	NA	NA	Exact	NA	NA	AU	10	NA	NA	IgM	Serum_Plasma	NA	NA	NA	Diseased	NA	NA	SARS-CoV-2	Human	Wuhan Tongji Hospital	Du	2020	10.1002/jmv.25820	NA	SH	1	Du_2020_25820	Patient46	42	42	NA	Exact	AU/mL	20.1	10	POS	NA	NA	Exact	NA
1	Du_Patient4725820	41	41	NA	NA	Exact	Symptom onset	6.04754564811635	NA	NA	NA	Exact	NA	NA	AU	10	NA	NA	IgM	Serum_Plasma	NA	NA	NA	Diseased	NA	NA	SARS-CoV-2	Human	Wuhan Tongji Hospital	Du	2020	10.1002/jmv.25820	NA	SH	1	Du_2020_25820	Patient47	41	41	NA	Exact	AU/mL	155.64	10	POS	NA	NA	Exact	NA
1	Du_Patient4825820	10	10	NA	NA	Exact	Symptom onset	0	NA	NA	NA	Exact	NA	NA	AU	10	NA	NA	IgM	Serum_Plasma	NA	NA	NA	Diseased	NA	NA	SARS-CoV-2	Human	Wuhan Tongji Hospital	Du	2020	10.1002/jmv.25820	NA	SH	1	Du_2020_25820	Patient48	10	10	NA	Exact	AU/mL	0	10	NEG	NA	NA	Exact	NA
1	Du_Patient4925820	42	42	NA	NA	Exact	Symptom onset	0	NA	NA	NA	Exact	NA	NA	AU	10	NA	NA	IgM	Serum_Plasma	NA	NA	NA	Diseased	NA	NA	SARS-CoV-2	Human	Wuhan Tongji Hospital	Du	2020	10.1002/jmv.25820	NA	SH	1	Du_2020_25820	Patient49	42	42	NA	Exact	AU/mL	0	10	NEG	NA	NA	Exact	NA
1	Du_Patient5025820	38	38	NA	NA	Exact	Symptom onset	0	NA	NA	NA	Exact	NA	NA	AU	10	NA	NA	IgM	Serum_Plasma	NA	NA	NA	Diseased	NA	NA	SARS-CoV-2	Human	Wuhan Tongji Hospital	Du	2020	10.1002/jmv.25820	NA	SH	1	Du_2020_25820	Patient50	38	38	NA	Exact	AU/mL	0	10	NEG	NA	NA	Exact	NA
1	Du_Patient5125820	42	42	NA	NA	Exact	Symptom onset	0	NA	NA	NA	Exact	NA	NA	AU	10	NA	NA	IgM	Serum_Plasma	NA	NA	NA	Diseased	NA	NA	SARS-CoV-2	Human	Wuhan Tongji Hospital	Du	2020	10.1002/jmv.25820	NA	SH	1	Du_2020_25820	Patient51	42	42	NA	Exact	AU/mL	0	10	NEG	NA	NA	Exact	NA
1	Du_Patient5225820	38	38	NA	NA	Exact	Symptom onset	0	NA	NA	NA	Exact	NA	NA	AU	10	NA	NA	IgM	Serum_Plasma	NA	NA	NA	Diseased	NA	NA	SARS-CoV-2	Human	Wuhan Tongji Hospital	Du	2020	10.1002/jmv.25820	NA	SH	1	Du_2020_25820	Patient52	38	38	NA	Exact	AU/mL	0	10	NEG	NA	NA	Exact	NA
1	Du_Patient5325820	39	39	NA	NA	Exact	Symptom onset	0	NA	NA	NA	Exact	NA	NA	AU	10	NA	NA	IgM	Serum_Plasma	NA	NA	NA	Diseased	NA	NA	SARS-CoV-2	Human	Wuhan Tongji Hospital	Du	2020	10.1002/jmv.25820	NA	SH	1	Du_2020_25820	Patient53	39	39	NA	Exact	AU/mL	0	10	NEG	NA	NA	Exact	NA
1	Du_Patient5425820	51	51	NA	NA	Exact	Symptom onset	0	NA	NA	NA	Exact	NA	NA	AU	10	NA	NA	IgM	Serum_Plasma	NA	NA	NA	Diseased	NA	NA	SARS-CoV-2	Human	Wuhan Tongji Hospital	Du	2020	10.1002/jmv.25820	NA	SH	1	Du_2020_25820	Patient54	51	51	NA	Exact	AU/mL	0	10	NEG	NA	NA	Exact	NA
1	Du_Patient5525820	60	60	NA	NA	Exact	Symptom onset	0	NA	NA	NA	Exact	NA	NA	AU	10	NA	NA	IgM	Serum_Plasma	NA	NA	NA	Diseased	NA	NA	SARS-CoV-2	Human	Wuhan Tongji Hospital	Du	2020	10.1002/jmv.25820	NA	SH	1	Du_2020_25820	Patient55	60	60	NA	Exact	AU/mL	0	10	NEG	NA	NA	Exact	NA
1	Du_Patient5625820	44	44	NA	NA	Exact	Symptom onset	0	NA	NA	NA	Exact	NA	NA	AU	10	NA	NA	IgM	Serum_Plasma	NA	NA	NA	Diseased	NA	NA	SARS-CoV-2	Human	Wuhan Tongji Hospital	Du	2020	10.1002/jmv.25820	NA	SH	1	Du_2020_25820	Patient56	44	44	NA	Exact	AU/mL	0	10	NEG	NA	NA	Exact	NA
1	Du_Patient5725820	43	43	NA	NA	Exact	Symptom onset	0	NA	NA	NA	Exact	NA	NA	AU	10	NA	NA	IgM	Serum_Plasma	NA	NA	NA	Diseased	NA	NA	SARS-CoV-2	Human	Wuhan Tongji Hospital	Du	2020	10.1002/jmv.25820	NA	SH	1	Du_2020_25820	Patient57	43	43	NA	Exact	AU/mL	0	10	NEG	NA	NA	Exact	NA
1	Du_Patient5825820	51	51	NA	NA	Exact	Symptom onset	0	NA	NA	NA	Exact	NA	NA	AU	10	NA	NA	IgM	Serum_Plasma	NA	NA	NA	Diseased	NA	NA	SARS-CoV-2	Human	Wuhan Tongji Hospital	Du	2020	10.1002/jmv.25820	NA	SH	1	Du_2020_25820	Patient58	51	51	NA	Exact	AU/mL	0	10	NEG	NA	NA	Exact	NA
1	Du_Patient5925820	41	41	NA	NA	Exact	Symptom onset	0	NA	NA	NA	Exact	NA	NA	AU	10	NA	NA	IgM	Serum_Plasma	NA	NA	NA	Diseased	NA	NA	SARS-CoV-2	Human	Wuhan Tongji Hospital	Du	2020	10.1002/jmv.25820	NA	SH	1	Du_2020_25820	Patient59	41	41	NA	Exact	AU/mL	0	10	NEG	NA	NA	Exact	NA
1	Du_Patient6025820	48	48	NA	NA	Exact	Symptom onset	0	NA	NA	NA	Exact	NA	NA	AU	10	NA	NA	IgM	Serum_Plasma	NA	NA	NA	Diseased	NA	NA	SARS-CoV-2	Human	Wuhan Tongji Hospital	Du	2020	10.1002/jmv.25820	NA	SH	1	Du_2020_25820	Patient60	48	48	NA	Exact	AU/mL	0	10	NEG	NA	NA	Exact	NA
1	Du_Patient125820	56	56	NA	NA	Exact	Symptom onset	6.44531394528238	NA	NA	NA	Exact	NA	NA	AU	10	NA	NA	IgG	Serum_Plasma	NA	NA	NA	Diseased	NA	NA	SARS-CoV-2	Human	Wuhan Tongji Hospital	Du	2020	10.1002/jmv.25820	NA	SH	1	Du_2020_25820	Patient1	56	56	NA	Exact	AU/mL	231.67	10	POS	NA	NA	Exact	NA
1	Du_Patient225820	41	41	NA	NA	Exact	Symptom onset	6.29214837740251	NA	NA	NA	Exact	NA	NA	AU	10	NA	NA	IgG	Serum_Plasma	NA	NA	NA	Diseased	NA	NA	SARS-CoV-2	Human	Wuhan Tongji Hospital	Du	2020	10.1002/jmv.25820	NA	SH	1	Du_2020_25820	Patient2	41	41	NA	Exact	AU/mL	198.77	10	POS	NA	NA	Exact	NA
1	Du_Patient325820	54	54	NA	NA	Exact	Symptom onset	7.14137051659965	NA	NA	NA	Exact	NA	NA	AU	10	NA	NA	IgG	Serum_Plasma	NA	NA	NA	Diseased	NA	NA	SARS-CoV-2	Human	Wuhan Tongji Hospital	Du	2020	10.1002/jmv.25820	NA	SH	1	Du_2020_25820	Patient3	54	54	NA	Exact	AU/mL	464.69	10	POS	NA	NA	Exact	NA
1	Du_Patient425820	45	45	NA	NA	Exact	Symptom onset	6.18307485103576	NA	NA	NA	Exact	NA	NA	AU	10	NA	NA	IgG	Serum_Plasma	NA	NA	NA	Diseased	NA	NA	SARS-CoV-2	Human	Wuhan Tongji Hospital	Du	2020	10.1002/jmv.25820	NA	SH	1	Du_2020_25820	Patient4	45	45	NA	Exact	AU/mL	178.23	10	POS	NA	NA	Exact	NA
1	Du_Patient525820	47	47	NA	NA	Exact	Symptom onset	6.91098632794642	NA	NA	NA	Exact	NA	NA	AU	10	NA	NA	IgG	Serum_Plasma	NA	NA	NA	Diseased	NA	NA	SARS-CoV-2	Human	Wuhan Tongji Hospital	Du	2020	10.1002/jmv.25820	NA	SH	1	Du_2020_25820	Patient5	47	47	NA	Exact	AU/mL	369.07	10	POS	NA	NA	Exact	NA
1	Du_Patient625820	56	56	NA	NA	Exact	Symptom onset	6.31355074718863	NA	NA	NA	Exact	NA	NA	AU	10	NA	NA	IgG	Serum_Plasma	NA	NA	NA	Diseased	NA	NA	SARS-CoV-2	Human	Wuhan Tongji Hospital	Du	2020	10.1002/jmv.25820	NA	SH	1	Du_2020_25820	Patient6	56	56	NA	Exact	AU/mL	203.07	10	POS	NA	NA	Exact	NA
1	Du_Patient725820	39	39	NA	NA	Exact	Symptom onset	6.31320597904179	NA	NA	NA	Exact	NA	NA	AU	10	NA	NA	IgG	Serum_Plasma	NA	NA	NA	Diseased	NA	NA	SARS-CoV-2	Human	Wuhan Tongji Hospital	Du	2020	10.1002/jmv.25820	NA	SH	1	Du_2020_25820	Patient7	39	39	NA	Exact	AU/mL	203	10	POS	NA	NA	Exact	NA
1	Du_Patient825820	52	52	NA	NA	Exact	Symptom onset	7.00598363320718	NA	NA	NA	Exact	NA	NA	AU	10	NA	NA	IgG	Serum_Plasma	NA	NA	NA	Diseased	NA	NA	SARS-CoV-2	Human	Wuhan Tongji Hospital	Du	2020	10.1002/jmv.25820	NA	SH	1	Du_2020_25820	Patient8	52	52	NA	Exact	AU/mL	405.85	10	POS	NA	NA	Exact	NA
1	Du_Patient925820	33	33	NA	NA	Exact	Symptom onset	6.16495738780274	NA	NA	NA	Exact	NA	NA	AU	10	NA	NA	IgG	Serum_Plasma	NA	NA	NA	Diseased	NA	NA	SARS-CoV-2	Human	Wuhan Tongji Hospital	Du	2020	10.1002/jmv.25820	NA	SH	1	Du_2020_25820	Patient9	33	33	NA	Exact	AU/mL	175.03	10	POS	NA	NA	Exact	NA
1	Du_Patient1025820	35	35	NA	NA	Exact	Symptom onset	4.45315712059287	NA	NA	NA	Exact	NA	NA	AU	10	NA	NA	IgG	Serum_Plasma	NA	NA	NA	Diseased	NA	NA	SARS-CoV-2	Human	Wuhan Tongji Hospital	Du	2020	10.1002/jmv.25820	NA	SH	1	Du_2020_25820	Patient10	35	35	NA	Exact	AU/mL	31.6	10	POS	NA	NA	Exact	NA
1	Du_Patient1125820	57	57	NA	NA	Exact	Symptom onset	6.09203093230025	NA	NA	NA	Exact	NA	NA	AU	10	NA	NA	IgG	Serum_Plasma	NA	NA	NA	Diseased	NA	NA	SARS-CoV-2	Human	Wuhan Tongji Hospital	Du	2020	10.1002/jmv.25820	NA	SH	1	Du_2020_25820	Patient11	57	57	NA	Exact	AU/mL	162.72	10	POS	NA	NA	Exact	NA
1	Du_Patient1225820	31	31	NA	NA	Exact	Symptom onset	6.26217191991168	NA	NA	NA	Exact	NA	NA	AU	10	NA	NA	IgG	Serum_Plasma	NA	NA	NA	Diseased	NA	NA	SARS-CoV-2	Human	Wuhan Tongji Hospital	Du	2020	10.1002/jmv.25820	NA	SH	1	Du_2020_25820	Patient12	31	31	NA	Exact	AU/mL	192.9	10	POS	NA	NA	Exact	NA
1	Du_Patient1325820	51	51	NA	NA	Exact	Symptom onset	6.39376390069205	NA	NA	NA	Exact	NA	NA	AU	10	NA	NA	IgG	Serum_Plasma	NA	NA	NA	Diseased	NA	NA	SARS-CoV-2	Human	Wuhan Tongji Hospital	Du	2020	10.1002/jmv.25820	NA	SH	1	Du_2020_25820	Patient13	51	51	NA	Exact	AU/mL	220.03	10	POS	NA	NA	Exact	NA
1	Du_Patient1425820	43	43	NA	NA	Exact	Symptom onset	5.93706051310419	NA	NA	NA	Exact	NA	NA	AU	10	NA	NA	IgG	Serum_Plasma	NA	NA	NA	Diseased	NA	NA	SARS-CoV-2	Human	Wuhan Tongji Hospital	Du	2020	10.1002/jmv.25820	NA	SH	1	Du_2020_25820	Patient14	43	43	NA	Exact	AU/mL	139.36	10	POS	NA	NA	Exact	NA
1	Du_Patient1525820	52	52	NA	NA	Exact	Symptom onset	6.17959013527924	NA	NA	NA	Exact	NA	NA	AU	10	NA	NA	IgG	Serum_Plasma	NA	NA	NA	Diseased	NA	NA	SARS-CoV-2	Human	Wuhan Tongji Hospital	Du	2020	10.1002/jmv.25820	NA	SH	1	Du_2020_25820	Patient15	52	52	NA	Exact	AU/mL	177.61	10	POS	NA	NA	Exact	NA
1	Du_Patient1625820	67	67	NA	NA	Exact	Symptom onset	6.08239766032315	NA	NA	NA	Exact	NA	NA	AU	10	NA	NA	IgG	Serum_Plasma	NA	NA	NA	Diseased	NA	NA	SARS-CoV-2	Human	Wuhan Tongji Hospital	Du	2020	10.1002/jmv.25820	NA	SH	1	Du_2020_25820	Patient16	67	67	NA	Exact	AU/mL	161.16	10	POS	NA	NA	Exact	NA
1	Du_Patient1725820	42	42	NA	NA	Exact	Symptom onset	6.27079199548328	NA	NA	NA	Exact	NA	NA	AU	10	NA	NA	IgG	Serum_Plasma	NA	NA	NA	Diseased	NA	NA	SARS-CoV-2	Human	Wuhan Tongji Hospital	Du	2020	10.1002/jmv.25820	NA	SH	1	Du_2020_25820	Patient17	42	42	NA	Exact	AU/mL	194.57	10	POS	NA	NA	Exact	NA
1	Du_Patient1825820	41	41	NA	NA	Exact	Symptom onset	6.27197339120843	NA	NA	NA	Exact	NA	NA	AU	10	NA	NA	IgG	Serum_Plasma	NA	NA	NA	Diseased	NA	NA	SARS-CoV-2	Human	Wuhan Tongji Hospital	Du	2020	10.1002/jmv.25820	NA	SH	1	Du_2020_25820	Patient18	41	41	NA	Exact	AU/mL	194.8	10	POS	NA	NA	Exact	NA
1	Du_Patient1925820	49	49	NA	NA	Exact	Symptom onset	5.57213033190989	NA	NA	NA	Exact	NA	NA	AU	10	NA	NA	IgG	Serum_Plasma	NA	NA	NA	Diseased	NA	NA	SARS-CoV-2	Human	Wuhan Tongji Hospital	Du	2020	10.1002/jmv.25820	NA	SH	1	Du_2020_25820	Patient19	49	49	NA	Exact	AU/mL	96.75	10	POS	NA	NA	Exact	NA
1	Du_Patient2025820	46	46	NA	NA	Exact	Symptom onset	5.91968891239343	NA	NA	NA	Exact	NA	NA	AU	10	NA	NA	IgG	Serum_Plasma	NA	NA	NA	Diseased	NA	NA	SARS-CoV-2	Human	Wuhan Tongji Hospital	Du	2020	10.1002/jmv.25820	NA	SH	1	Du_2020_25820	Patient20	46	46	NA	Exact	AU/mL	136.96	10	POS	NA	NA	Exact	NA
1	Du_Patient2125820	51	51	NA	NA	Exact	Symptom onset	6.91188006776514	NA	NA	NA	Exact	NA	NA	AU	10	NA	NA	IgG	Serum_Plasma	NA	NA	NA	Diseased	NA	NA	SARS-CoV-2	Human	Wuhan Tongji Hospital	Du	2020	10.1002/jmv.25820	NA	SH	1	Du_2020_25820	Patient21	51	51	NA	Exact	AU/mL	369.4	10	POS	NA	NA	Exact	NA
1	Du_Patient2225820	41	41	NA	NA	Exact	Symptom onset	6.18004045895698	NA	NA	NA	Exact	NA	NA	AU	10	NA	NA	IgG	Serum_Plasma	NA	NA	NA	Diseased	NA	NA	SARS-CoV-2	Human	Wuhan Tongji Hospital	Du	2020	10.1002/jmv.25820	NA	SH	1	Du_2020_25820	Patient22	41	41	NA	Exact	AU/mL	177.69	10	POS	NA	NA	Exact	NA
1	Du_Patient2325820	35	35	NA	NA	Exact	Symptom onset	6.48715928616522	NA	NA	NA	Exact	NA	NA	AU	10	NA	NA	IgG	Serum_Plasma	NA	NA	NA	Diseased	NA	NA	SARS-CoV-2	Human	Wuhan Tongji Hospital	Du	2020	10.1002/jmv.25820	NA	SH	1	Du_2020_25820	Patient23	35	35	NA	Exact	AU/mL	241.57	10	POS	NA	NA	Exact	NA
1	Du_Patient2425820	45	45	NA	NA	Exact	Symptom onset	6.29986616653789	NA	NA	NA	Exact	NA	NA	AU	10	NA	NA	IgG	Serum_Plasma	NA	NA	NA	Diseased	NA	NA	SARS-CoV-2	Human	Wuhan Tongji Hospital	Du	2020	10.1002/jmv.25820	NA	SH	1	Du_2020_25820	Patient24	45	45	NA	Exact	AU/mL	200.31	10	POS	NA	NA	Exact	NA
1	Du_Patient2525820	42	42	NA	NA	Exact	Symptom onset	6.10891077003085	NA	NA	NA	Exact	NA	NA	AU	10	NA	NA	IgG	Serum_Plasma	NA	NA	NA	Diseased	NA	NA	SARS-CoV-2	Human	Wuhan Tongji Hospital	Du	2020	10.1002/jmv.25820	NA	SH	1	Du_2020_25820	Patient25	42	42	NA	Exact	AU/mL	165.49	10	POS	NA	NA	Exact	NA
1	Du_Patient2625820	47	47	NA	NA	Exact	Symptom onset	6.84926714139818	NA	NA	NA	Exact	NA	NA	AU	10	NA	NA	IgG	Serum_Plasma	NA	NA	NA	Diseased	NA	NA	SARS-CoV-2	Human	Wuhan Tongji Hospital	Du	2020	10.1002/jmv.25820	NA	SH	1	Du_2020_25820	Patient26	47	47	NA	Exact	AU/mL	346.98	10	POS	NA	NA	Exact	NA
1	Du_Patient2725820	49	49	NA	NA	Exact	Symptom onset	6.14662200329584	NA	NA	NA	Exact	NA	NA	AU	10	NA	NA	IgG	Serum_Plasma	NA	NA	NA	Diseased	NA	NA	SARS-CoV-2	Human	Wuhan Tongji Hospital	Du	2020	10.1002/jmv.25820	NA	SH	1	Du_2020_25820	Patient27	49	49	NA	Exact	AU/mL	171.85	10	POS	NA	NA	Exact	NA
1	Du_Patient2825820	46	46	NA	NA	Exact	Symptom onset	5.92420556609787	NA	NA	NA	Exact	NA	NA	AU	10	NA	NA	IgG	Serum_Plasma	NA	NA	NA	Diseased	NA	NA	SARS-CoV-2	Human	Wuhan Tongji Hospital	Du	2020	10.1002/jmv.25820	NA	SH	1	Du_2020_25820	Patient28	46	46	NA	Exact	AU/mL	137.58	10	POS	NA	NA	Exact	NA
1	Du_Patient2925820	42	42	NA	NA	Exact	Symptom onset	6.24042338812913	NA	NA	NA	Exact	NA	NA	AU	10	NA	NA	IgG	Serum_Plasma	NA	NA	NA	Diseased	NA	NA	SARS-CoV-2	Human	Wuhan Tongji Hospital	Du	2020	10.1002/jmv.25820	NA	SH	1	Du_2020_25820	Patient29	42	42	NA	Exact	AU/mL	188.75	10	POS	NA	NA	Exact	NA
1	Du_Patient3025820	34	34	NA	NA	Exact	Symptom onset	6.34147263686196	NA	NA	NA	Exact	NA	NA	AU	10	NA	NA	IgG	Serum_Plasma	NA	NA	NA	Diseased	NA	NA	SARS-CoV-2	Human	Wuhan Tongji Hospital	Du	2020	10.1002/jmv.25820	NA	SH	1	Du_2020_25820	Patient30	34	34	NA	Exact	AU/mL	208.82	10	POS	NA	NA	Exact	NA
1	Du_Patient3125820	33	33	NA	NA	Exact	Symptom onset	6.228270368236	NA	NA	NA	Exact	NA	NA	AU	10	NA	NA	IgG	Serum_Plasma	NA	NA	NA	Diseased	NA	NA	SARS-CoV-2	Human	Wuhan Tongji Hospital	Du	2020	10.1002/jmv.25820	NA	SH	1	Du_2020_25820	Patient31	33	33	NA	Exact	AU/mL	186.47	10	POS	NA	NA	Exact	NA
1	Du_Patient3225820	31	31	NA	NA	Exact	Symptom onset	6.19528746622849	NA	NA	NA	Exact	NA	NA	AU	10	NA	NA	IgG	Serum_Plasma	NA	NA	NA	Diseased	NA	NA	SARS-CoV-2	Human	Wuhan Tongji Hospital	Du	2020	10.1002/jmv.25820	NA	SH	1	Du_2020_25820	Patient32	31	31	NA	Exact	AU/mL	180.42	10	POS	NA	NA	Exact	NA
1	Du_Patient3325820	39	39	NA	NA	Exact	Symptom onset	6.08846015955956	NA	NA	NA	Exact	NA	NA	AU	10	NA	NA	IgG	Serum_Plasma	NA	NA	NA	Diseased	NA	NA	SARS-CoV-2	Human	Wuhan Tongji Hospital	Du	2020	10.1002/jmv.25820	NA	SH	1	Du_2020_25820	Patient33	39	39	NA	Exact	AU/mL	162.14	10	POS	NA	NA	Exact	NA
1	Du_Patient3425820	43	43	NA	NA	Exact	Symptom onset	6.70294879390762	NA	NA	NA	Exact	NA	NA	AU	10	NA	NA	IgG	Serum_Plasma	NA	NA	NA	Diseased	NA	NA	SARS-CoV-2	Human	Wuhan Tongji Hospital	Du	2020	10.1002/jmv.25820	NA	SH	1	Du_2020_25820	Patient34	43	43	NA	Exact	AU/mL	299.75	10	POS	NA	NA	Exact	NA
1	Du_Patient3525820	47	47	NA	NA	Exact	Symptom onset	7.86902484562207	NA	NA	NA	Exact	NA	NA	AU	10	NA	NA	IgG	Serum_Plasma	NA	NA	NA	Diseased	NA	NA	SARS-CoV-2	Human	Wuhan Tongji Hospital	Du	2020	10.1002/jmv.25820	NA	SH	1	Du_2020_25820	Patient35	47	47	NA	Exact	AU/mL	962.01	10	POS	NA	NA	Exact	NA
1	Du_Patient3625820	41	41	NA	NA	Exact	Symptom onset	7.59844090640324	NA	NA	NA	Exact	NA	NA	AU	10	NA	NA	IgG	Serum_Plasma	NA	NA	NA	Diseased	NA	NA	SARS-CoV-2	Human	Wuhan Tongji Hospital	Du	2020	10.1002/jmv.25820	NA	SH	1	Du_2020_25820	Patient36	41	41	NA	Exact	AU/mL	733.95	10	POS	NA	NA	Exact	NA
1	Du_Patient3725820	48	48	NA	NA	Exact	Symptom onset	6.0656284023903	NA	NA	NA	Exact	NA	NA	AU	10	NA	NA	IgG	Serum_Plasma	NA	NA	NA	Diseased	NA	NA	SARS-CoV-2	Human	Wuhan Tongji Hospital	Du	2020	10.1002/jmv.25820	NA	SH	1	Du_2020_25820	Patient37	48	48	NA	Exact	AU/mL	158.48	10	POS	NA	NA	Exact	NA
1	Du_Patient3825820	48	48	NA	NA	Exact	Symptom onset	6.82597060842029	NA	NA	NA	Exact	NA	NA	AU	10	NA	NA	IgG	Serum_Plasma	NA	NA	NA	Diseased	NA	NA	SARS-CoV-2	Human	Wuhan Tongji Hospital	Du	2020	10.1002/jmv.25820	NA	SH	1	Du_2020_25820	Patient38	48	48	NA	Exact	AU/mL	338.99	10	POS	NA	NA	Exact	NA
1	Du_Patient3925820	42	42	NA	NA	Exact	Symptom onset	6.32802178925437	NA	NA	NA	Exact	NA	NA	AU	10	NA	NA	IgG	Serum_Plasma	NA	NA	NA	Diseased	NA	NA	SARS-CoV-2	Human	Wuhan Tongji Hospital	Du	2020	10.1002/jmv.25820	NA	SH	1	Du_2020_25820	Patient39	42	42	NA	Exact	AU/mL	206.03	10	POS	NA	NA	Exact	NA
1	Du_Patient4025820	46	46	NA	NA	Exact	Symptom onset	7.87237677508032	NA	NA	NA	Exact	NA	NA	AU	10	NA	NA	IgG	Serum_Plasma	NA	NA	NA	Diseased	NA	NA	SARS-CoV-2	Human	Wuhan Tongji Hospital	Du	2020	10.1002/jmv.25820	NA	SH	1	Du_2020_25820	Patient40	46	46	NA	Exact	AU/mL	965.24	10	POS	NA	NA	Exact	NA
1	Du_Patient4125820	50	50	NA	NA	Exact	Symptom onset	5.9004483350615	NA	NA	NA	Exact	NA	NA	AU	10	NA	NA	IgG	Serum_Plasma	NA	NA	NA	Diseased	NA	NA	SARS-CoV-2	Human	Wuhan Tongji Hospital	Du	2020	10.1002/jmv.25820	NA	SH	1	Du_2020_25820	Patient41	50	50	NA	Exact	AU/mL	134.35	10	POS	NA	NA	Exact	NA
1	Du_Patient4225820	48	48	NA	NA	Exact	Symptom onset	5.72348641280613	NA	NA	NA	Exact	NA	NA	AU	10	NA	NA	IgG	Serum_Plasma	NA	NA	NA	Diseased	NA	NA	SARS-CoV-2	Human	Wuhan Tongji Hospital	Du	2020	10.1002/jmv.25820	NA	SH	1	Du_2020_25820	Patient42	48	48	NA	Exact	AU/mL	112.56	10	POS	NA	NA	Exact	NA
1	Du_Patient4325820	42	42	NA	NA	Exact	Symptom onset	7.04196752928109	NA	NA	NA	Exact	NA	NA	AU	10	NA	NA	IgG	Serum_Plasma	NA	NA	NA	Diseased	NA	NA	SARS-CoV-2	Human	Wuhan Tongji Hospital	Du	2020	10.1002/jmv.25820	NA	SH	1	Du_2020_25820	Patient43	42	42	NA	Exact	AU/mL	420.72	10	POS	NA	NA	Exact	NA
1	Du_Patient4425820	41	41	NA	NA	Exact	Symptom onset	7.9820182391246	NA	NA	NA	Exact	NA	NA	AU	10	NA	NA	IgG	Serum_Plasma	NA	NA	NA	Diseased	NA	NA	SARS-CoV-2	Human	Wuhan Tongji Hospital	Du	2020	10.1002/jmv.25820	NA	SH	1	Du_2020_25820	Patient44	41	41	NA	Exact	AU/mL	1077.09	10	POS	NA	NA	Exact	NA
1	Du_Patient4525820	40	40	NA	NA	Exact	Symptom onset	6.45129593114512	NA	NA	NA	Exact	NA	NA	AU	10	NA	NA	IgG	Serum_Plasma	NA	NA	NA	Diseased	NA	NA	SARS-CoV-2	Human	Wuhan Tongji Hospital	Du	2020	10.1002/jmv.25820	NA	SH	1	Du_2020_25820	Patient45	40	40	NA	Exact	AU/mL	233.06	10	POS	NA	NA	Exact	NA
1	Du_Patient4625820	42	42	NA	NA	Exact	Symptom onset	6.09246102662042	NA	NA	NA	Exact	NA	NA	AU	10	NA	NA	IgG	Serum_Plasma	NA	NA	NA	Diseased	NA	NA	SARS-CoV-2	Human	Wuhan Tongji Hospital	Du	2020	10.1002/jmv.25820	NA	SH	1	Du_2020_25820	Patient46	42	42	NA	Exact	AU/mL	162.79	10	POS	NA	NA	Exact	NA
1	Du_Patient4725820	41	41	NA	NA	Exact	Symptom onset	6.63282338571571	NA	NA	NA	Exact	NA	NA	AU	10	NA	NA	IgG	Serum_Plasma	NA	NA	NA	Diseased	NA	NA	SARS-CoV-2	Human	Wuhan Tongji Hospital	Du	2020	10.1002/jmv.25820	NA	SH	1	Du_2020_25820	Patient47	41	41	NA	Exact	AU/mL	279.45	10	POS	NA	NA	Exact	NA
1	Du_Patient4825820	10	10	NA	NA	Exact	Symptom onset	6.13709171804881	NA	NA	NA	Exact	NA	NA	AU	10	NA	NA	IgG	Serum_Plasma	NA	NA	NA	Diseased	NA	NA	SARS-CoV-2	Human	Wuhan Tongji Hospital	Du	2020	10.1002/jmv.25820	NA	SH	1	Du_2020_25820	Patient48	10	10	NA	Exact	AU/mL	170.22	10	POS	NA	NA	Exact	NA
1	Du_Patient4925820	42	42	NA	NA	Exact	Symptom onset	5.29524250458899	NA	NA	NA	Exact	NA	NA	AU	10	NA	NA	IgG	Serum_Plasma	NA	NA	NA	Diseased	NA	NA	SARS-CoV-2	Human	Wuhan Tongji Hospital	Du	2020	10.1002/jmv.25820	NA	SH	1	Du_2020_25820	Patient49	42	42	NA	Exact	AU/mL	73.35	10	POS	NA	NA	Exact	NA
1	Du_Patient5025820	38	38	NA	NA	Exact	Symptom onset	6.22434784634786	NA	NA	NA	Exact	NA	NA	AU	10	NA	NA	IgG	Serum_Plasma	NA	NA	NA	Diseased	NA	NA	SARS-CoV-2	Human	Wuhan Tongji Hospital	Du	2020	10.1002/jmv.25820	NA	SH	1	Du_2020_25820	Patient50	38	38	NA	Exact	AU/mL	185.74	10	POS	NA	NA	Exact	NA
1	Du_Patient5125820	42	42	NA	NA	Exact	Symptom onset	5.89140120617256	NA	NA	NA	Exact	NA	NA	AU	10	NA	NA	IgG	Serum_Plasma	NA	NA	NA	Diseased	NA	NA	SARS-CoV-2	Human	Wuhan Tongji Hospital	Du	2020	10.1002/jmv.25820	NA	SH	1	Du_2020_25820	Patient51	42	42	NA	Exact	AU/mL	133.14	10	POS	NA	NA	Exact	NA
1	Du_Patient5225820	38	38	NA	NA	Exact	Symptom onset	5.79933796506573	NA	NA	NA	Exact	NA	NA	AU	10	NA	NA	IgG	Serum_Plasma	NA	NA	NA	Diseased	NA	NA	SARS-CoV-2	Human	Wuhan Tongji Hospital	Du	2020	10.1002/jmv.25820	NA	SH	1	Du_2020_25820	Patient52	38	38	NA	Exact	AU/mL	121.43	10	POS	NA	NA	Exact	NA
1	Du_Patient5325820	39	39	NA	NA	Exact	Symptom onset	4.00568260440716	NA	NA	NA	Exact	NA	NA	AU	10	NA	NA	IgG	Serum_Plasma	NA	NA	NA	Diseased	NA	NA	SARS-CoV-2	Human	Wuhan Tongji Hospital	Du	2020	10.1002/jmv.25820	NA	SH	1	Du_2020_25820	Patient53	39	39	NA	Exact	AU/mL	20.2	10	POS	NA	NA	Exact	NA
1	Du_Patient5425820	51	51	NA	NA	Exact	Symptom onset	6.25546205624161	NA	NA	NA	Exact	NA	NA	AU	10	NA	NA	IgG	Serum_Plasma	NA	NA	NA	Diseased	NA	NA	SARS-CoV-2	Human	Wuhan Tongji Hospital	Du	2020	10.1002/jmv.25820	NA	SH	1	Du_2020_25820	Patient54	51	51	NA	Exact	AU/mL	191.61	10	POS	NA	NA	Exact	NA
1	Du_Patient5525820	60	60	NA	NA	Exact	Symptom onset	3.71866038021423	NA	NA	NA	Exact	NA	NA	AU	10	NA	NA	IgG	Serum_Plasma	NA	NA	NA	Diseased	NA	NA	SARS-CoV-2	Human	Wuhan Tongji Hospital	Du	2020	10.1002/jmv.25820	NA	SH	1	Du_2020_25820	Patient55	60	60	NA	Exact	AU/mL	15.16	10	POS	NA	NA	Exact	NA
1	Du_Patient5625820	44	44	NA	NA	Exact	Symptom onset	4.24298290021143	NA	NA	NA	Exact	NA	NA	AU	10	NA	NA	IgG	Serum_Plasma	NA	NA	NA	Diseased	NA	NA	SARS-CoV-2	Human	Wuhan Tongji Hospital	Du	2020	10.1002/jmv.25820	NA	SH	1	Du_2020_25820	Patient56	44	44	NA	Exact	AU/mL	25.61	10	POS	NA	NA	Exact	NA
1	Du_Patient5725820	43	43	NA	NA	Exact	Symptom onset	6.3627933857324	NA	NA	NA	Exact	NA	NA	AU	10	NA	NA	IgG	Serum_Plasma	NA	NA	NA	Diseased	NA	NA	SARS-CoV-2	Human	Wuhan Tongji Hospital	Du	2020	10.1002/jmv.25820	NA	SH	1	Du_2020_25820	Patient57	43	43	NA	Exact	AU/mL	213.32	10	POS	NA	NA	Exact	NA
1	Du_Patient5825820	51	51	NA	NA	Exact	Symptom onset	6.21123325964092	NA	NA	NA	Exact	NA	NA	AU	10	NA	NA	IgG	Serum_Plasma	NA	NA	NA	Diseased	NA	NA	SARS-CoV-2	Human	Wuhan Tongji Hospital	Du	2020	10.1002/jmv.25820	NA	SH	1	Du_2020_25820	Patient58	51	51	NA	Exact	AU/mL	183.32	10	POS	NA	NA	Exact	NA
1	Du_Patient5925820	41	41	NA	NA	Exact	Symptom onset	6.3379226211404	NA	NA	NA	Exact	NA	NA	AU	10	NA	NA	IgG	Serum_Plasma	NA	NA	NA	Diseased	NA	NA	SARS-CoV-2	Human	Wuhan Tongji Hospital	Du	2020	10.1002/jmv.25820	NA	SH	1	Du_2020_25820	Patient59	41	41	NA	Exact	AU/mL	208.08	10	POS	NA	NA	Exact	NA
1	Du_Patient6025820	48	48	NA	NA	Exact	Symptom onset	6.01595445557386	NA	NA	NA	Exact	NA	NA	AU	10	NA	NA	IgG	Serum_Plasma	NA	NA	NA	Diseased	NA	NA	SARS-CoV-2	Human	Wuhan Tongji Hospital	Du	2020	10.1002/jmv.25820	NA	SH	1	Du_2020_25820	Patient60	48	48	NA	Exact	AU/mL	150.8	10	POS	NA	NA	Exact	NA
1	Haveri_FinlandCase100266	4	4	NA	NA	Exact	Symptom onset	0	NA	NA	NA	Exact	2	Inf	Dilution	20	NA	Table	IgG	Serum_Plasma	NA	NA	Mild_Moderate	Diseased	IFA	Vero E6 infected cells	SARS-CoV-2	Human	Finland Rovaniemi	Haveri	2020	10.2807/1560-7917.ES.2020.25.11.2000266	NA	BB	1	Haveri_2020_00266	FinlandCase1	4	4	Exact	Symptom onset	2-fold dilution	0	20	NEG	NA	NA	Exact	2
1	Haveri_FinlandCase100266	9	9	NA	NA	Exact	Symptom onset	5.38202663467388	NA	NA	NA	Exact	2	Inf	Dilution	20	NA	Table	IgG	Serum_Plasma	NA	NA	Mild_Moderate	Diseased	IFA	Vero E6 infected cells	SARS-CoV-2	Human	Finland Rovaniemi	Haveri	2020	10.2807/1560-7917.ES.2020.25.11.2000266	NA	BB	1	Haveri_2020_00266	FinlandCase1	9	9	Exact	Symptom onset	2-fold dilution	80	20	POS	NA	NA	Exact	2
1	Haveri_FinlandCase100266	10	10	NA	NA	Exact	Symptom onset	6.07517381523383	NA	NA	NA	Exact	2	Inf	Dilution	20	NA	Table	IgG	Serum_Plasma	NA	NA	Mild_Moderate	Diseased	IFA	Vero E6 infected cells	SARS-CoV-2	Human	Finland Rovaniemi	Haveri	2020	10.2807/1560-7917.ES.2020.25.11.2000266	NA	BB	1	Haveri_2020_00266	FinlandCase1	10	10	Exact	Symptom onset	2-fold dilution	160	20	POS	NA	NA	Exact	2
1	Haveri_FinlandCase100266	20	20	NA	NA	Exact	Symptom onset	8.15461535691366	NA	NA	NA	Exact	2	Inf	Dilution	20	NA	Table	IgG	Serum_Plasma	NA	NA	Mild_Moderate	Diseased	IFA	Vero E6 infected cells	SARS-CoV-2	Human	Finland Rovaniemi	Haveri	2020	10.2807/1560-7917.ES.2020.25.11.2000266	NA	BB	1	Haveri_2020_00266	FinlandCase1	20	20	Exact	Symptom onset	2-fold dilution	1280	20	POS	NA	NA	Exact	2
1	Haveri_FinlandCase100266	4	4	NA	NA	Exact	Symptom onset	0	NA	NA	NA	Exact	2	Inf	Dilution	20	NA	Table	IgM	Serum_Plasma	NA	NA	Mild_Moderate	Diseased	IFA	Vero E6 infected cells	SARS-CoV-2	Human	Finland Rovaniemi	Haveri	2020	10.2807/1560-7917.ES.2020.25.11.2000266	NA	BB	1	Haveri_2020_00266	FinlandCase1	4	4	Exact	Symptom onset	2-fold dilution	0	20	NEG	NA	NA	Exact	2
1	Haveri_FinlandCase100266	9	9	NA	NA	Exact	Symptom onset	5.38202663467388	NA	NA	NA	Exact	2	Inf	Dilution	20	NA	Table	IgM	Serum_Plasma	NA	NA	Mild_Moderate	Diseased	IFA	Vero E6 infected cells	SARS-CoV-2	Human	Finland Rovaniemi	Haveri	2020	10.2807/1560-7917.ES.2020.25.11.2000266	NA	BB	1	Haveri_2020_00266	FinlandCase1	9	9	Exact	Symptom onset	2-fold dilution	80	20	POS	NA	NA	Exact	2
1	Haveri_FinlandCase100266	10	10	NA	NA	Exact	Symptom onset	6.07517381523383	NA	NA	NA	Exact	2	Inf	Dilution	20	NA	Table	IgM	Serum_Plasma	NA	NA	Mild_Moderate	Diseased	IFA	Vero E6 infected cells	SARS-CoV-2	Human	Finland Rovaniemi	Haveri	2020	10.2807/1560-7917.ES.2020.25.11.2000266	NA	BB	1	Haveri_2020_00266	FinlandCase1	10	10	Exact	Symptom onset	2-fold dilution	160	20	POS	NA	NA	Exact	2
1	Haveri_FinlandCase100266	20	20	NA	NA	Exact	Symptom onset	6.76832099579377	NA	NA	NA	Exact	2	Inf	Dilution	20	NA	Table	IgM	Serum_Plasma	NA	NA	Mild_Moderate	Diseased	IFA	Vero E6 infected cells	SARS-CoV-2	Human	Finland Rovaniemi	Haveri	2020	10.2807/1560-7917.ES.2020.25.11.2000266	NA	BB	1	Haveri_2020_00266	FinlandCase1	20	20	Exact	Symptom onset	2-fold dilution	320	20	POS	NA	NA	Exact	2
1	Haveri_FinlandCase100266	4	4	NA	NA	Exact	Symptom onset	0	NA	NA	NA	Exact	2	Inf	Dilution	4	NA	Table	NT Ab	Serum_Plasma	NA	NA	Mild_Moderate	Diseased	Neutralization assay	NA	SARS-CoV-2	Human	Finland Rovaniemi	Haveri	2020	10.2807/1560-7917.ES.2020.25.11.2000266	NA	BB	1	Haveri_2020_00266	FinlandCase1	4	4	Exact	Symptom onset	2-fold dilution	0	4	NEG	NA	NA	Exact	2
1	Haveri_FinlandCase100266	9	9	NA	NA	Exact	Symptom onset	5.0943445622221	NA	NA	NA	Exact	2	Inf	Dilution	4	NA	Table	NT Ab	Serum_Plasma	NA	NA	Mild_Moderate	Diseased	Neutralization assay	NA	SARS-CoV-2	Human	Finland Rovaniemi	Haveri	2020	10.2807/1560-7917.ES.2020.25.11.2000266	NA	BB	1	Haveri_2020_00266	FinlandCase1	9	9	Exact	Symptom onset	2-fold dilution	60	4	POS	NA	NA	Exact	2
1	Haveri_FinlandCase100266	10	10	NA	NA	Exact	Symptom onset	5.27666611901606	NA	NA	NA	Exact	2	Inf	Dilution	4	NA	Table	NT Ab	Serum_Plasma	NA	NA	Mild_Moderate	Diseased	Neutralization assay	NA	SARS-CoV-2	Human	Finland Rovaniemi	Haveri	2020	10.2807/1560-7917.ES.2020.25.11.2000266	NA	BB	1	Haveri_2020_00266	FinlandCase1	10	10	Exact	Symptom onset	2-fold dilution	72	4	POS	NA	NA	Exact	2
1	Haveri_FinlandCase100266	20	20	NA	NA	Exact	Symptom onset	6.07517381523383	NA	NA	NA	Exact	2	Inf	Dilution	4	NA	Table	NT Ab	Serum_Plasma	NA	NA	Mild_Moderate	Diseased	Neutralization assay	NA	SARS-CoV-2	Human	Finland Rovaniemi	Haveri	2020	10.2807/1560-7917.ES.2020.25.11.2000266	NA	BB	1	Haveri_2020_00266	FinlandCase1	20	20	Exact	Symptom onset	2-fold dilution	160	4	POS	NA	NA	Exact	2
1	Haveri_FinlandCase100266	3	3	NA	NA	Exact	Symptom onset	4.41739876100016	NA	NA	NA	Exact	NA	NA	Ct	NA	NA	Table	Virus	Upper_respiratory	NA	NA	Mild_Moderate	Diseased	RTPCR	NA	SARS-CoV-2	Human	Finland Rovaniemi	Haveri	2020	10.2807/1560-7917.ES.2020.25.11.2000266	NA	BB	1	Haveri_2020_00266	FinlandCase1	3	3	Exact	Symptom onset	Ct	30.49	NA	POS	NA	NA	Exact	NA
1	Haveri_FinlandCase100266	4	4	NA	NA	Exact	Symptom onset	4.38743646641212	NA	NA	NA	Exact	NA	NA	Ct	NA	NA	Table	Virus	Upper_respiratory	NA	NA	Mild_Moderate	Diseased	RTPCR	NA	SARS-CoV-2	Human	Finland Rovaniemi	Haveri	2020	10.2807/1560-7917.ES.2020.25.11.2000266	NA	BB	1	Haveri_2020_00266	FinlandCase1	4	4	Exact	Symptom onset	Ct	29.59	NA	POS	NA	NA	Exact	NA
1	Haveri_FinlandCase100266	9	9	NA	NA	Exact	Symptom onset	0	NA	NA	NA	Exact	NA	NA	Ct	NA	NA	Table	Virus	Upper_respiratory	NA	NA	Mild_Moderate	Diseased	RTPCR	NA	SARS-CoV-2	Human	Finland Rovaniemi	Haveri	2020	10.2807/1560-7917.ES.2020.25.11.2000266	NA	BB	1	Haveri_2020_00266	FinlandCase1	9	9	Exact	Symptom onset	Ct	0	NA	NEG	NA	NA	Exact	NA
1	Haveri_FinlandCase100266	10	10	NA	NA	Exact	Symptom onset	0	NA	NA	NA	Exact	NA	NA	Ct	NA	NA	Table	Virus	Upper_respiratory	NA	NA	Mild_Moderate	Diseased	RTPCR	NA	SARS-CoV-2	Human	Finland Rovaniemi	Haveri	2020	10.2807/1560-7917.ES.2020.25.11.2000266	NA	BB	1	Haveri_2020_00266	FinlandCase1	10	10	Exact	Symptom onset	Ct	0	NA	NEG	NA	NA	Exact	NA
1	Haveri_FinlandCase100266	23	23	NA	NA	Exact	Symptom onset	0	NA	NA	NA	Exact	NA	NA	Ct	NA	NA	Table	Virus	Upper_respiratory	NA	NA	Mild_Moderate	Diseased	RTPCR	NA	SARS-CoV-2	Human	Finland Rovaniemi	Haveri	2020	10.2807/1560-7917.ES.2020.25.11.2000266	NA	BB	1	Haveri_2020_00266	FinlandCase1	23	23	Exact	Symptom onset	Ct	0	NA	NEG	NA	NA	Exact	NA
1	Haveri_FinlandCase100266	3	3	NA	NA	Exact	Symptom onset	4.41707073081845	NA	NA	NA	Exact	NA	NA	Ct	NA	NA	Table	Virus	Upper_respiratory	NA	NA	Mild_Moderate	Diseased	RTPCR	NA	SARS-CoV-2	Human	Finland Rovaniemi	Haveri	2020	10.2807/1560-7917.ES.2020.25.11.2000266	NA	BB	1	Haveri_2020_00266	FinlandCase1	3	3	Exact	Symptom onset	Ct	30.48	NA	POS	NA	NA	Exact	NA
1	Haveri_FinlandCase100266	4	4	NA	NA	Exact	Symptom onset	4.42978483851407	NA	NA	NA	Exact	NA	NA	Ct	NA	NA	Table	Virus	Upper_respiratory	NA	NA	Mild_Moderate	Diseased	RTPCR	NA	SARS-CoV-2	Human	Finland Rovaniemi	Haveri	2020	10.2807/1560-7917.ES.2020.25.11.2000266	NA	BB	1	Haveri_2020_00266	FinlandCase1	4	4	Exact	Symptom onset	Ct	30.87	NA	POS	NA	NA	Exact	NA
1	Haveri_FinlandCase100266	9	9	NA	NA	Exact	Symptom onset	0	NA	NA	NA	Exact	NA	NA	Ct	NA	NA	Table	Virus	Upper_respiratory	NA	NA	Mild_Moderate	Diseased	RTPCR	NA	SARS-CoV-2	Human	Finland Rovaniemi	Haveri	2020	10.2807/1560-7917.ES.2020.25.11.2000266	NA	BB	1	Haveri_2020_00266	FinlandCase1	9	9	Exact	Symptom onset	Ct	0	NA	NEG	NA	NA	Exact	NA
1	Haveri_FinlandCase100266	10	10	NA	NA	Exact	Symptom onset	0	NA	NA	NA	Exact	NA	NA	Ct	NA	NA	Table	Virus	Upper_respiratory	NA	NA	Mild_Moderate	Diseased	RTPCR	NA	SARS-CoV-2	Human	Finland Rovaniemi	Haveri	2020	10.2807/1560-7917.ES.2020.25.11.2000266	NA	BB	1	Haveri_2020_00266	FinlandCase1	10	10	Exact	Symptom onset	Ct	0	NA	NEG	NA	NA	Exact	NA
1	Haveri_FinlandCase100266	23	23	NA	NA	Exact	Symptom onset	0	NA	NA	NA	Exact	NA	NA	Ct	NA	NA	Table	Virus	Upper_respiratory	NA	NA	Mild_Moderate	Diseased	RTPCR	NA	SARS-CoV-2	Human	Finland Rovaniemi	Haveri	2020	10.2807/1560-7917.ES.2020.25.11.2000266	NA	BB	1	Haveri_2020_00266	FinlandCase1	23	23	Exact	Symptom onset	Ct	0	NA	NEG	NA	NA	Exact	NA
1	Haveri_FinlandCase100266	3	3	NA	NA	Exact	Symptom onset	4.45284061481399	NA	NA	NA	Exact	NA	NA	Ct	NA	NA	Table	Virus	Upper_respiratory	NA	NA	Mild_Moderate	Diseased	RTPCR	NA	SARS-CoV-2	Human	Finland Rovaniemi	Haveri	2020	10.2807/1560-7917.ES.2020.25.11.2000266	NA	BB	1	Haveri_2020_00266	FinlandCase1	3	3	Exact	Symptom onset	Ct	31.59	NA	POS	NA	NA	Exact	NA
1	Haveri_FinlandCase100266	4	4	NA	NA	Exact	Symptom onset	4.45883716110857	NA	NA	NA	Exact	NA	NA	Ct	NA	NA	Table	Virus	Upper_respiratory	NA	NA	Mild_Moderate	Diseased	RTPCR	NA	SARS-CoV-2	Human	Finland Rovaniemi	Haveri	2020	10.2807/1560-7917.ES.2020.25.11.2000266	NA	BB	1	Haveri_2020_00266	FinlandCase1	4	4	Exact	Symptom onset	Ct	31.78	NA	POS	NA	NA	Exact	NA
1	Haveri_FinlandCase100266	9	9	NA	NA	Exact	Symptom onset	0	NA	NA	NA	Exact	NA	NA	Ct	NA	NA	Table	Virus	Upper_respiratory	NA	NA	Mild_Moderate	Diseased	RTPCR	NA	SARS-CoV-2	Human	Finland Rovaniemi	Haveri	2020	10.2807/1560-7917.ES.2020.25.11.2000266	NA	BB	1	Haveri_2020_00266	FinlandCase1	9	9	Exact	Symptom onset	Ct	0	NA	NEG	NA	NA	Exact	NA
1	Haveri_FinlandCase100266	10	10	NA	NA	Exact	Symptom onset	0	NA	NA	NA	Exact	NA	NA	Ct	NA	NA	Table	Virus	Upper_respiratory	NA	NA	Mild_Moderate	Diseased	RTPCR	NA	SARS-CoV-2	Human	Finland Rovaniemi	Haveri	2020	10.2807/1560-7917.ES.2020.25.11.2000266	NA	BB	1	Haveri_2020_00266	FinlandCase1	10	10	Exact	Symptom onset	Ct	0	NA	NEG	NA	NA	Exact	NA
1	Haveri_FinlandCase100266	23	23	NA	NA	Exact	Symptom onset	0	NA	NA	NA	Exact	NA	NA	Ct	NA	NA	Table	Virus	Upper_respiratory	NA	NA	Mild_Moderate	Diseased	RTPCR	NA	SARS-CoV-2	Human	Finland Rovaniemi	Haveri	2020	10.2807/1560-7917.ES.2020.25.11.2000266	NA	BB	1	Haveri_2020_00266	FinlandCase1	23	23	Exact	Symptom onset	Ct	0	NA	NEG	NA	NA	Exact	NA
1	Haveri_FinlandCase100266	4	4	NA	NA	Exact	Symptom onset	0	NA	NA	NA	Exact	NA	NA	Ct	NA	NA	Table	Virus	Serum_Plasma	NA	NA	Mild_Moderate	Diseased	RTPCR	NA	SARS-CoV-2	Human	Finland Rovaniemi	Haveri	2020	10.2807/1560-7917.ES.2020.25.11.2000266	NA	BB	1	Haveri_2020_00266	FinlandCase1	4	4	Exact	Symptom onset	Ct	0	NA	NEG	NA	NA	Exact	NA
1	Haveri_FinlandCase100266	9	9	NA	NA	Exact	Symptom onset	0	NA	NA	NA	Exact	NA	NA	Ct	NA	NA	Table	Virus	Serum_Plasma	NA	NA	Mild_Moderate	Diseased	RTPCR	NA	SARS-CoV-2	Human	Finland Rovaniemi	Haveri	2020	10.2807/1560-7917.ES.2020.25.11.2000266	NA	BB	1	Haveri_2020_00266	FinlandCase1	9	9	Exact	Symptom onset	Ct	0	NA	NEG	NA	NA	Exact	NA
1	Haveri_FinlandCase100266	20	20	NA	NA	Exact	Symptom onset	0	NA	NA	NA	Exact	NA	NA	Ct	NA	NA	Table	Virus	Serum_Plasma	NA	NA	Mild_Moderate	Diseased	RTPCR	NA	SARS-CoV-2	Human	Finland Rovaniemi	Haveri	2020	10.2807/1560-7917.ES.2020.25.11.2000266	NA	BB	1	Haveri_2020_00266	FinlandCase1	20	20	Exact	Symptom onset	Ct	0	NA	NEG	NA	NA	Exact	NA
1	Haveri_FinlandCase100266	4	4	NA	NA	Exact	Symptom onset	0	NA	NA	NA	Exact	NA	NA	Ct	NA	NA	Table	Virus	Serum_Plasma	NA	NA	Mild_Moderate	Diseased	RTPCR	NA	SARS-CoV-2	Human	Finland Rovaniemi	Haveri	2020	10.2807/1560-7917.ES.2020.25.11.2000266	NA	BB	1	Haveri_2020_00266	FinlandCase1	4	4	Exact	Symptom onset	Ct	0	NA	NEG	NA	NA	Exact	NA
1	Haveri_FinlandCase100266	9	9	NA	NA	Exact	Symptom onset	0	NA	NA	NA	Exact	NA	NA	Ct	NA	NA	Table	Virus	Serum_Plasma	NA	NA	Mild_Moderate	Diseased	RTPCR	NA	SARS-CoV-2	Human	Finland Rovaniemi	Haveri	2020	10.2807/1560-7917.ES.2020.25.11.2000266	NA	BB	1	Haveri_2020_00266	FinlandCase1	9	9	Exact	Symptom onset	Ct	0	NA	NEG	NA	NA	Exact	NA
1	Haveri_FinlandCase100266	20	20	NA	NA	Exact	Symptom onset	0	NA	NA	NA	Exact	NA	NA	Ct	NA	NA	Table	Virus	Serum_Plasma	NA	NA	Mild_Moderate	Diseased	RTPCR	NA	SARS-CoV-2	Human	Finland Rovaniemi	Haveri	2020	10.2807/1560-7917.ES.2020.25.11.2000266	NA	BB	1	Haveri_2020_00266	FinlandCase1	20	20	Exact	Symptom onset	Ct	0	NA	NEG	NA	NA	Exact	NA
1	Haveri_FinlandCase100266	4	4	NA	NA	Exact	Symptom onset	0	NA	NA	NA	Exact	NA	NA	Ct	NA	NA	Table	Virus	Serum_Plasma	NA	NA	Mild_Moderate	Diseased	RTPCR	NA	SARS-CoV-2	Human	Finland Rovaniemi	Haveri	2020	10.2807/1560-7917.ES.2020.25.11.2000266	NA	BB	1	Haveri_2020_00266	FinlandCase1	4	4	Exact	Symptom onset	Ct	0	NA	NEG	NA	NA	Exact	NA
1	Haveri_FinlandCase100266	9	9	NA	NA	Exact	Symptom onset	0	NA	NA	NA	Exact	NA	NA	Ct	NA	NA	Table	Virus	Serum_Plasma	NA	NA	Mild_Moderate	Diseased	RTPCR	NA	SARS-CoV-2	Human	Finland Rovaniemi	Haveri	2020	10.2807/1560-7917.ES.2020.25.11.2000266	NA	BB	1	Haveri_2020_00266	FinlandCase1	9	9	Exact	Symptom onset	Ct	0	NA	NEG	NA	NA	Exact	NA
1	Haveri_FinlandCase100266	20	20	NA	NA	Exact	Symptom onset	0	NA	NA	NA	Exact	NA	NA	Ct	NA	NA	Table	Virus	Serum_Plasma	NA	NA	Mild_Moderate	Diseased	RTPCR	NA	SARS-CoV-2	Human	Finland Rovaniemi	Haveri	2020	10.2807/1560-7917.ES.2020.25.11.2000266	NA	BB	1	Haveri_2020_00266	FinlandCase1	20	20	Exact	Symptom onset	Ct	0	NA	NEG	NA	NA	Exact	NA
1	Jiang_AG_0139495	9	9	NA	NA	Exact	Symptom onset	9.48690730643609	Exact	NA	NA	Visual	NA	NA	Fluorescent intensity	NA	NA	Figure 7A	IgG	Serum_Plasma	NA	NA	NA	Diseased	Microarray	Spike	SARS-CoV-2	Human	Foshan; China	Jiang	2020	10.1101/2020.03.20.20039495	Microarray assay concept close to an indirect ELISA	AMG	1	Jiang_2020_39495	AG_01	9	9	Exact	Symptom onset	Fluorescent intensity	4850.840687	NA	POS	NA	NA	Estimated	NA
1	Jiang_AG_0239495	17	17	NA	NA	Exact	Symptom onset	8.74442930143261	Exact	NA	NA	Visual	NA	NA	Fluorescent intensity	NA	NA	Figure 7A	IgG	Serum_Plasma	NA	NA	NA	Diseased	Microarray	Spike	SARS-CoV-2	Human	Foshan; China	Jiang	2020	10.1101/2020.03.20.20039495	Microarray assay concept close to an indirect ELISA	AMG	1	Jiang_2020_39495	AG_02	17	17	Exact	Symptom onset	Fluorescent intensity	2308.67559	NA	POS	NA	NA	Estimated	NA
1	Jiang_AG_0339495	17	17	NA	NA	Exact	Symptom onset	8.22744109513572	Exact	NA	NA	Visual	NA	NA	Fluorescent intensity	NA	NA	Figure 7A	IgG	Serum_Plasma	NA	NA	NA	Diseased	Microarray	Spike	SARS-CoV-2	Human	Foshan; China	Jiang	2020	10.1101/2020.03.20.20039495	Microarray assay concept close to an indirect ELISA	AMG	1	Jiang_2020_39495	AG_03	17	17	Exact	Symptom onset	Fluorescent intensity	1376.695161	NA	POS	NA	NA	Estimated	NA
1	Jiang_AG_0439495	18	18	NA	NA	Exact	Symptom onset	9.68287788217973	Exact	NA	NA	Visual	NA	NA	Fluorescent intensity	NA	NA	Figure 7A	IgG	Serum_Plasma	NA	NA	NA	Diseased	Microarray	Spike	SARS-CoV-2	Human	Foshan; China	Jiang	2020	10.1101/2020.03.20.20039495	Microarray assay concept close to an indirect ELISA	AMG	1	Jiang_2020_39495	AG_04	18	18	Exact	Symptom onset	Fluorescent intensity	5901.004574	NA	POS	NA	NA	Estimated	NA
1	Jiang_AG_0539495	18	18	NA	NA	Exact	Symptom onset	7.44948172770168	Exact	NA	NA	Visual	NA	NA	Fluorescent intensity	NA	NA	Figure 7A	IgG	Serum_Plasma	NA	NA	NA	Diseased	Microarray	Spike	SARS-CoV-2	Human	Foshan; China	Jiang	2020	10.1101/2020.03.20.20039495	Microarray assay concept close to an indirect ELISA	AMG	1	Jiang_2020_39495	AG_05	18	18	Exact	Symptom onset	Fluorescent intensity	632.3744657	NA	POS	NA	NA	Estimated	NA
1	Jiang_AG_0639495	19	19	NA	NA	Exact	Symptom onset	10.0805208386703	Exact	NA	NA	Visual	NA	NA	Fluorescent intensity	NA	NA	Figure 7A	IgG	Serum_Plasma	NA	NA	NA	Diseased	Microarray	Spike	SARS-CoV-2	Human	Foshan; China	Jiang	2020	10.1101/2020.03.20.20039495	Microarray assay concept close to an indirect ELISA	AMG	1	Jiang_2020_39495	AG_06	19	19	Exact	Symptom onset	Fluorescent intensity	8782.539122	NA	POS	NA	NA	Estimated	NA
1	Jiang_AG_0739495	19	19	NA	NA	Exact	Symptom onset	9.95169550711833	Exact	NA	NA	Visual	NA	NA	Fluorescent intensity	NA	NA	Figure 7A	IgG	Serum_Plasma	NA	NA	NA	Diseased	Microarray	Spike	SARS-CoV-2	Human	Foshan; China	Jiang	2020	10.1101/2020.03.20.20039495	Microarray assay concept close to an indirect ELISA	AMG	1	Jiang_2020_39495	AG_07	19	19	Exact	Symptom onset	Fluorescent intensity	7720.971732	NA	POS	NA	NA	Estimated	NA
1	Jiang_AG_0839495	20	20	NA	NA	Exact	Symptom onset	10.6605246394232	Exact	NA	NA	Visual	NA	NA	Fluorescent intensity	NA	NA	Figure 7A	IgG	Serum_Plasma	NA	NA	NA	Diseased	Microarray	Spike	SARS-CoV-2	Human	Foshan; China	Jiang	2020	10.1101/2020.03.20.20039495	Microarray assay concept close to an indirect ELISA	AMG	1	Jiang_2020_39495	AG_08	20	20	Exact	Symptom onset	Fluorescent intensity	15686.01201	NA	POS	NA	NA	Estimated	NA
1	Jiang_AG_0939495	20	20	NA	NA	Exact	Symptom onset	8.62412805170595	Exact	NA	NA	Visual	NA	NA	Fluorescent intensity	NA	NA	Figure 7A	IgG	Serum_Plasma	NA	NA	NA	Diseased	Microarray	Spike	SARS-CoV-2	Human	Foshan; China	Jiang	2020	10.1101/2020.03.20.20039495	Microarray assay concept close to an indirect ELISA	AMG	1	Jiang_2020_39495	AG_09	20	20	Exact	Symptom onset	Fluorescent intensity	2046.994813	NA	POS	NA	NA	Estimated	NA
1	Jiang_AG_1039495	21	21	NA	NA	Exact	Symptom onset	9.39744582036573	Exact	NA	NA	Visual	NA	NA	Fluorescent intensity	NA	NA	Figure 7A	IgG	Serum_Plasma	NA	NA	NA	Diseased	Microarray	Spike	SARS-CoV-2	Human	Foshan; China	Jiang	2020	10.1101/2020.03.20.20039495	Microarray assay concept close to an indirect ELISA	AMG	1	Jiang_2020_39495	AG_10	21	21	Exact	Symptom onset	Fluorescent intensity	4435.722634	NA	POS	NA	NA	Estimated	NA
1	Jiang_AG_1139495	21	21	NA	NA	Exact	Symptom onset	8.16834084249858	Exact	NA	NA	Visual	NA	NA	Fluorescent intensity	NA	NA	Figure 7A	IgG	Serum_Plasma	NA	NA	NA	Diseased	Microarray	Spike	SARS-CoV-2	Human	Foshan; China	Jiang	2020	10.1101/2020.03.20.20039495	Microarray assay concept close to an indirect ELISA	AMG	1	Jiang_2020_39495	AG_11	21	21	Exact	Symptom onset	Fluorescent intensity	1297.689744	NA	POS	NA	NA	Estimated	NA
1	Jiang_AG_1239495	21	21	NA	NA	Exact	Symptom onset	8.96547666797831	Exact	NA	NA	Visual	NA	NA	Fluorescent intensity	NA	NA	Figure 7A	IgG	Serum_Plasma	NA	NA	NA	Diseased	Microarray	Spike	SARS-CoV-2	Human	Foshan; China	Jiang	2020	10.1101/2020.03.20.20039495	Microarray assay concept close to an indirect ELISA	AMG	1	Jiang_2020_39495	AG_12	21	21	Exact	Symptom onset	Fluorescent intensity	2879.80156	NA	POS	NA	NA	Estimated	NA
1	Jiang_AG_1339495	22	22	NA	NA	Exact	Symptom onset	10.1957805508321	Exact	NA	NA	Visual	NA	NA	Fluorescent intensity	NA	NA	Figure 7A	IgG	Serum_Plasma	NA	NA	NA	Diseased	Microarray	Spike	SARS-CoV-2	Human	Foshan; China	Jiang	2020	10.1101/2020.03.20.20039495	Microarray assay concept close to an indirect ELISA	AMG	1	Jiang_2020_39495	AG_13	22	22	Exact	Symptom onset	Fluorescent intensity	9855.456605	NA	POS	NA	NA	Estimated	NA
1	Jiang_AG_1439495	22	22	NA	NA	Exact	Symptom onset	9.54184719077332	Exact	NA	NA	Visual	NA	NA	Fluorescent intensity	NA	NA	Figure 7A	IgG	Serum_Plasma	NA	NA	NA	Diseased	Microarray	Spike	SARS-CoV-2	Human	Foshan; China	Jiang	2020	10.1101/2020.03.20.20039495	Microarray assay concept close to an indirect ELISA	AMG	1	Jiang_2020_39495	AG_14	22	22	Exact	Symptom onset	Fluorescent intensity	5124.802111	NA	POS	NA	NA	Estimated	NA
1	Jiang_AG_1539495	22	22	NA	NA	Exact	Symptom onset	9.5911927279196	Exact	NA	NA	Visual	NA	NA	Fluorescent intensity	NA	NA	Figure 7A	IgG	Serum_Plasma	NA	NA	NA	Diseased	Microarray	Spike	SARS-CoV-2	Human	Foshan; China	Jiang	2020	10.1101/2020.03.20.20039495	Microarray assay concept close to an indirect ELISA	AMG	1	Jiang_2020_39495	AG_15	22	22	Exact	Symptom onset	Fluorescent intensity	5384.031532	NA	POS	NA	NA	Estimated	NA
1	Jiang_AG_1639495	23	23	NA	NA	Exact	Symptom onset	8.90085140728782	Exact	NA	NA	Visual	NA	NA	Fluorescent intensity	NA	NA	Figure 7A	IgG	Serum_Plasma	NA	NA	NA	Diseased	Microarray	Spike	SARS-CoV-2	Human	Foshan; China	Jiang	2020	10.1101/2020.03.20.20039495	Microarray assay concept close to an indirect ELISA	AMG	1	Jiang_2020_39495	AG_16	23	23	Exact	Symptom onset	Fluorescent intensity	2699.579792	NA	POS	NA	NA	Estimated	NA
1	Jiang_AG_1739495	24	24	NA	NA	Exact	Symptom onset	9.9326680616148	Exact	NA	NA	Visual	NA	NA	Fluorescent intensity	NA	NA	Figure 7A	IgG	Serum_Plasma	NA	NA	NA	Diseased	Microarray	Spike	SARS-CoV-2	Human	Foshan; China	Jiang	2020	10.1101/2020.03.20.20039495	Microarray assay concept close to an indirect ELISA	AMG	1	Jiang_2020_39495	AG_17	24	24	Exact	Symptom onset	Fluorescent intensity	7575.450205	NA	POS	NA	NA	Estimated	NA
1	Jiang_AG_1839495	24	24	NA	NA	Exact	Symptom onset	8.43671802739385	Exact	NA	NA	Visual	NA	NA	Fluorescent intensity	NA	NA	Figure 7A	IgG	Serum_Plasma	NA	NA	NA	Diseased	Microarray	Spike	SARS-CoV-2	Human	Foshan; China	Jiang	2020	10.1101/2020.03.20.20039495	Microarray assay concept close to an indirect ELISA	AMG	1	Jiang_2020_39495	AG_18	24	24	Exact	Symptom onset	Fluorescent intensity	1697.171002	NA	POS	NA	NA	Estimated	NA
1	Jiang_AG_1939495	26	26	NA	NA	Exact	Symptom onset	10.5372021665969	Exact	NA	NA	Visual	NA	NA	Fluorescent intensity	NA	NA	Figure 7A	IgG	Serum_Plasma	NA	NA	NA	Diseased	Microarray	Spike	SARS-CoV-2	Human	Foshan; China	Jiang	2020	10.1101/2020.03.20.20039495	Microarray assay concept close to an indirect ELISA	AMG	1	Jiang_2020_39495	AG_19	26	26	Exact	Symptom onset	Fluorescent intensity	13866.09827	NA	POS	NA	NA	Estimated	NA
1	Jiang_AG_2039495	27	27	NA	NA	Exact	Symptom onset	10.3596660272144	Exact	NA	NA	Visual	NA	NA	Fluorescent intensity	NA	NA	Figure 7A	IgG	Serum_Plasma	NA	NA	NA	Diseased	Microarray	Spike	SARS-CoV-2	Human	Foshan; China	Jiang	2020	10.1101/2020.03.20.20039495	Microarray assay concept close to an indirect ELISA	AMG	1	Jiang_2020_39495	AG_20	27	27	Exact	Symptom onset	Fluorescent intensity	11610.5103	NA	POS	NA	NA	Estimated	NA
1	Jiang_AG_2139495	27	27	NA	NA	Exact	Symptom onset	9.13941728291185	Exact	NA	NA	Visual	NA	NA	Fluorescent intensity	NA	NA	Figure 7A	IgG	Serum_Plasma	NA	NA	NA	Diseased	Microarray	Spike	SARS-CoV-2	Human	Foshan; China	Jiang	2020	10.1101/2020.03.20.20039495	Microarray assay concept close to an indirect ELISA	AMG	1	Jiang_2020_39495	AG_21	27	27	Exact	Symptom onset	Fluorescent intensity	3426.920361	NA	POS	NA	NA	Estimated	NA
1	Jiang_AG_2239495	28	28	NA	NA	Exact	Symptom onset	10.4187853497861	Exact	NA	NA	Visual	NA	NA	Fluorescent intensity	NA	NA	Figure 7A	IgG	Serum_Plasma	NA	NA	NA	Diseased	Microarray	Spike	SARS-CoV-2	Human	Foshan; China	Jiang	2020	10.1101/2020.03.20.20039495	Microarray assay concept close to an indirect ELISA	AMG	1	Jiang_2020_39495	AG_22	28	28	Exact	Symptom onset	Fluorescent intensity	12317.61154	NA	POS	NA	NA	Estimated	NA
1	Jiang_AG_2339495	29	29	NA	NA	Exact	Symptom onset	9.51535831946783	Exact	NA	NA	Visual	NA	NA	Fluorescent intensity	NA	NA	Figure 7A	IgG	Serum_Plasma	NA	NA	NA	Diseased	Microarray	Spike	SARS-CoV-2	Human	Foshan; China	Jiang	2020	10.1101/2020.03.20.20039495	Microarray assay concept close to an indirect ELISA	AMG	1	Jiang_2020_39495	AG_23	29	29	Exact	Symptom onset	Fluorescent intensity	4990.834052	NA	POS	NA	NA	Estimated	NA
1	Jiang_AG_2439495	29	29	NA	NA	Exact	Symptom onset	9.23020576404269	Exact	NA	NA	Visual	NA	NA	Fluorescent intensity	NA	NA	Figure 7A	IgG	Serum_Plasma	NA	NA	NA	Diseased	Microarray	Spike	SARS-CoV-2	Human	Foshan; China	Jiang	2020	10.1101/2020.03.20.20039495	Microarray assay concept close to an indirect ELISA	AMG	1	Jiang_2020_39495	AG_24	29	29	Exact	Symptom onset	Fluorescent intensity	3752.605824	NA	POS	NA	NA	Estimated	NA
1	Jiang_AG_2539495	33	33	NA	NA	Exact	Symptom onset	10.583173564149	Exact	NA	NA	Visual	NA	NA	Fluorescent intensity	NA	NA	Figure 7A	IgG	Serum_Plasma	NA	NA	NA	Diseased	Microarray	Spike	SARS-CoV-2	Human	Foshan; China	Jiang	2020	10.1101/2020.03.20.20039495	Microarray assay concept close to an indirect ELISA	AMG	1	Jiang_2020_39495	AG_25	33	33	Exact	Symptom onset	Fluorescent intensity	14518.42141	NA	POS	NA	NA	Estimated	NA
1	Jiang_AG_2639495	32	32	NA	NA	Exact	Symptom onset	10.1213103376317	Exact	NA	NA	Visual	NA	NA	Fluorescent intensity	NA	NA	Figure 7A	IgG	Serum_Plasma	NA	NA	NA	Diseased	Microarray	Spike	SARS-CoV-2	Human	Foshan; China	Jiang	2020	10.1101/2020.03.20.20039495	Microarray assay concept close to an indirect ELISA	AMG	1	Jiang_2020_39495	AG_26	32	32	Exact	Symptom onset	Fluorescent intensity	9148.180972	NA	POS	NA	NA	Estimated	NA
1	Jiang_AG_2739495	27	27	NA	NA	Exact	Symptom onset	8.81678127202644	Exact	NA	NA	Visual	NA	NA	Fluorescent intensity	NA	NA	Figure 7A	IgG	Serum_Plasma	NA	NA	NA	Diseased	Microarray	Spike	SARS-CoV-2	Human	Foshan; China	Jiang	2020	10.1101/2020.03.20.20039495	Microarray assay concept close to an indirect ELISA	AMG	1	Jiang_2020_39495	AG_27	27	27	Exact	Symptom onset	Fluorescent intensity	2481.903964	NA	POS	NA	NA	Estimated	NA
1	Jiang_AG_2839495	13	13	NA	NA	Exact	Symptom onset	7.16434513074994	Exact	NA	NA	Visual	NA	NA	Fluorescent intensity	NA	NA	Figure 7A	IgG	Serum_Plasma	NA	NA	NA	Diseased	Microarray	Spike	SARS-CoV-2	Human	Foshan; China	Jiang	2020	10.1101/2020.03.20.20039495	Microarray assay concept close to an indirect ELISA	AMG	1	Jiang_2020_39495	AG_28	13	13	Exact	Symptom onset	Fluorescent intensity	475.4896574	NA	POS	NA	NA	Estimated	NA
1	Jiang_AG_2939495	18	18	NA	NA	Exact	Symptom onset	7.89943158092423	Exact	NA	NA	Visual	NA	NA	Fluorescent intensity	NA	NA	Figure 7A	IgG	Serum_Plasma	NA	NA	NA	Diseased	Microarray	Spike	SARS-CoV-2	Human	Foshan; China	Jiang	2020	10.1101/2020.03.20.20039495	Microarray assay concept close to an indirect ELISA	AMG	1	Jiang_2020_39495	AG_29	18	18	Exact	Symptom onset	Fluorescent intensity	991.710848	NA	POS	NA	NA	Estimated	NA
1	Lee_BB253.003	6	6	NA	NA	Exact	Symptom onset	0	NA	NA	NA	Exact	NA	NA	NA	NA	NA	Table 1	IgG	Serum_Plasma	NA	NA	Mild_Moderate	Diseased	ALLTEST 2019-nCoV Rapid Test Hangzhou	NA	SARS-CoV-2	Human	Tainan Taiwan	Lee	2020	﻿10.1016/j.jmii.2020.03.003	Sample times are reported as days since hospital admission, and table shows symptom onset 4 days earlier, so adding that to time to get days since symptom onset. Might be slightly off.	BB	1	Lee_2020_3.003	BB25	6	6	Exact	Symptom onset	NA	0	NA	NEG	NA	NA	Exact	NA
1	Lee_BB253.003	7	7	NA	NA	Exact	Symptom onset	0	NA	NA	NA	Exact	NA	NA	NA	NA	NA	Table 1	IgG	Serum_Plasma	NA	NA	Mild_Moderate	Diseased	ALLTEST 2019-nCoV Rapid Test Hangzhou	NA	SARS-CoV-2	Human	Tainan Taiwan	Lee	2020	﻿10.1016/j.jmii.2020.03.003	Sample times are reported as days since hospital admission, and table shows symptom onset 4 days earlier, so adding that to time to get days since symptom onset. Might be slightly off.	BB	1	Lee_2020_3.003	BB25	7	7	Exact	Symptom onset	NA	0	NA	NEG	NA	NA	Exact	NA
1	Lee_BB253.003	11	11	NA	NA	Exact	Symptom onset	NA	NA	NA	NA	Exact	NA	NA	NA	NA	NA	Table 1	IgG	Serum_Plasma	NA	NA	Mild_Moderate	Diseased	ALLTEST 2019-nCoV Rapid Test Hangzhou	NA	SARS-CoV-2	Human	Tainan Taiwan	Lee	2020	﻿10.1016/j.jmii.2020.03.003	Sample times are reported as days since hospital admission, and table shows symptom onset 4 days earlier, so adding that to time to get days since symptom onset. Might be slightly off.	BB	1	Lee_2020_3.003	BB25	11	11	Exact	Symptom onset	NA	NA	NA	POS	NA	NA	Exact	NA
1	Lee_BB253.003	13	13	NA	NA	Exact	Symptom onset	NA	NA	NA	NA	Exact	NA	NA	NA	NA	NA	Table 1	IgG	Serum_Plasma	NA	NA	Mild_Moderate	Diseased	ALLTEST 2019-nCoV Rapid Test Hangzhou	NA	SARS-CoV-2	Human	Tainan Taiwan	Lee	2020	﻿10.1016/j.jmii.2020.03.003	Sample times are reported as days since hospital admission, and table shows symptom onset 4 days earlier, so adding that to time to get days since symptom onset. Might be slightly off.	BB	1	Lee_2020_3.003	BB25	13	13	Exact	Symptom onset	NA	NA	NA	POS	NA	NA	Exact	NA
1	Lee_BB253.003	17	17	NA	NA	Exact	Symptom onset	NA	NA	NA	NA	Exact	NA	NA	NA	NA	NA	Table 1	IgG	Serum_Plasma	NA	NA	Mild_Moderate	Diseased	ALLTEST 2019-nCoV Rapid Test Hangzhou	NA	SARS-CoV-2	Human	Tainan Taiwan	Lee	2020	﻿10.1016/j.jmii.2020.03.003	Sample times are reported as days since hospital admission, and table shows symptom onset 4 days earlier, so adding that to time to get days since symptom onset. Might be slightly off.	BB	1	Lee_2020_3.003	BB25	17	17	Exact	Symptom onset	NA	NA	NA	POS	NA	NA	Exact	NA
1	Lee_BB253.003	24	24	NA	NA	Exact	Symptom onset	NA	NA	NA	NA	Exact	NA	NA	NA	NA	NA	Table 1	IgG	Serum_Plasma	NA	NA	Mild_Moderate	Diseased	ALLTEST 2019-nCoV Rapid Test Hangzhou	NA	SARS-CoV-2	Human	Tainan Taiwan	Lee	2020	﻿10.1016/j.jmii.2020.03.003	Sample times are reported as days since hospital admission, and table shows symptom onset 4 days earlier, so adding that to time to get days since symptom onset. Might be slightly off.	BB	1	Lee_2020_3.003	BB25	24	24	Exact	Symptom onset	NA	NA	NA	POS	NA	NA	Exact	NA
1	Lee_BB253.003	27	27	NA	NA	Exact	Symptom onset	NA	NA	NA	NA	Exact	NA	NA	NA	NA	NA	Table 1	IgG	Serum_Plasma	NA	NA	Mild_Moderate	Diseased	ALLTEST 2019-nCoV Rapid Test Hangzhou	NA	SARS-CoV-2	Human	Tainan Taiwan	Lee	2020	﻿10.1016/j.jmii.2020.03.003	Sample times are reported as days since hospital admission, and table shows symptom onset 4 days earlier, so adding that to time to get days since symptom onset. Might be slightly off.	BB	1	Lee_2020_3.003	BB25	27	27	Exact	Symptom onset	NA	NA	NA	POS	NA	NA	Exact	NA
1	Lee_BB253.003	9	9	NA	NA	Exact	Symptom onset	NA	NA	NA	NA	Exact	NA	NA	NA	NA	NA	Table 1	Virus	Upper_respiratory	NA	NA	Mild_Moderate	Diseased	RTPCR	NA	SARS-CoV-2	Human	Tainan Taiwan	Lee	2020	﻿10.1016/j.jmii.2020.03.003	Sample times are reported as days since hospital admission, and table shows symptom onset 4 days earlier, so adding that to time to get days since symptom onset. Might be slightly off.	BB	1	Lee_2020_3.003	BB25	9	9	Exact	Symptom onset	NA	NA	NA	POS	NA	NA	Exact	NA
1	Lee_BB253.003	11	11	NA	NA	Exact	Symptom onset	NA	NA	NA	NA	Exact	NA	NA	NA	NA	NA	Table 1	Virus	Upper_respiratory	NA	NA	Mild_Moderate	Diseased	RTPCR	NA	SARS-CoV-2	Human	Tainan Taiwan	Lee	2020	﻿10.1016/j.jmii.2020.03.003	Sample times are reported as days since hospital admission, and table shows symptom onset 4 days earlier, so adding that to time to get days since symptom onset. Might be slightly off.	BB	1	Lee_2020_3.003	BB25	11	11	Exact	Symptom onset	NA	NA	NA	POS	NA	NA	Exact	NA
1	Lee_BB253.003	25	25	NA	NA	Exact	Symptom onset	0	NA	NA	NA	Exact	NA	NA	NA	NA	NA	Table 1	Virus	Upper_respiratory	NA	NA	Mild_Moderate	Diseased	RTPCR	NA	SARS-CoV-2	Human	Tainan Taiwan	Lee	2020	﻿10.1016/j.jmii.2020.03.003	Sample times are reported as days since hospital admission, and table shows symptom onset 4 days earlier, so adding that to time to get days since symptom onset. Might be slightly off.	BB	1	Lee_2020_3.003	BB25	25	25	Exact	Symptom onset	NA	0	NA	NEG	NA	NA	Exact	NA
1	Lee_BB253.003	11	11	NA	NA	Exact	Symptom onset	0	NA	NA	NA	Exact	NA	NA	NA	NA	NA	Table 1	Virus	Upper_respiratory	NA	NA	Mild_Moderate	Diseased	RTPCR	NA	SARS-CoV-2	Human	Tainan Taiwan	Lee	2020	﻿10.1016/j.jmii.2020.03.003	Sample times are reported as days since hospital admission, and table shows symptom onset 4 days earlier, so adding that to time to get days since symptom onset. Might be slightly off.	BB	1	Lee_2020_3.003	BB25	11	11	Exact	Symptom onset	NA	0	NA	NEG	NA	NA	Exact	NA
1	Lee_BB253.003	13	13	NA	NA	Exact	Symptom onset	NA	NA	NA	NA	Exact	NA	NA	NA	NA	NA	Table 1	Virus	Upper_respiratory	NA	NA	Mild_Moderate	Diseased	RTPCR	NA	SARS-CoV-2	Human	Tainan Taiwan	Lee	2020	﻿10.1016/j.jmii.2020.03.003	Sample times are reported as days since hospital admission, and table shows symptom onset 4 days earlier, so adding that to time to get days since symptom onset. Might be slightly off.	BB	1	Lee_2020_3.003	BB25	13	13	Exact	Symptom onset	NA	NA	NA	POS	NA	NA	Exact	NA
1	Lee_BB253.003	17	17	NA	NA	Exact	Symptom onset	NA	NA	NA	NA	Exact	NA	NA	NA	NA	NA	Table 1	Virus	Upper_respiratory	NA	NA	Mild_Moderate	Diseased	RTPCR	NA	SARS-CoV-2	Human	Tainan Taiwan	Lee	2020	﻿10.1016/j.jmii.2020.03.003	Sample times are reported as days since hospital admission, and table shows symptom onset 4 days earlier, so adding that to time to get days since symptom onset. Might be slightly off.	BB	1	Lee_2020_3.003	BB25	17	17	Exact	Symptom onset	NA	NA	NA	POS	NA	NA	Exact	NA
1	Lee_BB253.003	19	19	NA	NA	Exact	Symptom onset	NA	NA	NA	NA	Exact	NA	NA	NA	NA	NA	Table 1	Virus	Upper_respiratory	NA	NA	Mild_Moderate	Diseased	RTPCR	NA	SARS-CoV-2	Human	Tainan Taiwan	Lee	2020	﻿10.1016/j.jmii.2020.03.003	Sample times are reported as days since hospital admission, and table shows symptom onset 4 days earlier, so adding that to time to get days since symptom onset. Might be slightly off.	BB	1	Lee_2020_3.003	BB25	19	19	Exact	Symptom onset	NA	NA	NA	POS	NA	NA	Exact	NA
1	Lee_BB253.003	20	20	NA	NA	Exact	Symptom onset	0	NA	NA	NA	Exact	NA	NA	NA	NA	NA	Table 1	Virus	Upper_respiratory	NA	NA	Mild_Moderate	Diseased	RTPCR	NA	SARS-CoV-2	Human	Tainan Taiwan	Lee	2020	﻿10.1016/j.jmii.2020.03.003	Sample times are reported as days since hospital admission, and table shows symptom onset 4 days earlier, so adding that to time to get days since symptom onset. Might be slightly off.	BB	1	Lee_2020_3.003	BB25	20	20	Exact	Symptom onset	NA	0	NA	NEG	NA	NA	Exact	NA
1	Lee_BB253.003	24	24	NA	NA	Exact	Symptom onset	0	NA	NA	NA	Exact	NA	NA	NA	NA	NA	Table 1	Virus	Upper_respiratory	NA	NA	Mild_Moderate	Diseased	RTPCR	NA	SARS-CoV-2	Human	Tainan Taiwan	Lee	2020	﻿10.1016/j.jmii.2020.03.003	Sample times are reported as days since hospital admission, and table shows symptom onset 4 days earlier, so adding that to time to get days since symptom onset. Might be slightly off.	BB	1	Lee_2020_3.003	BB25	24	24	Exact	Symptom onset	NA	0	NA	NEG	NA	NA	Exact	NA
1	Lee_BB253.003	25	25	NA	NA	Exact	Symptom onset	0	NA	NA	NA	Exact	NA	NA	NA	NA	NA	Table 1	Virus	Upper_respiratory	NA	NA	Mild_Moderate	Diseased	RTPCR	NA	SARS-CoV-2	Human	Tainan Taiwan	Lee	2020	﻿10.1016/j.jmii.2020.03.003	Sample times are reported as days since hospital admission, and table shows symptom onset 4 days earlier, so adding that to time to get days since symptom onset. Might be slightly off.	BB	1	Lee_2020_3.003	BB25	25	25	Exact	Symptom onset	NA	0	NA	NEG	NA	NA	Exact	NA
2	Liu_N1-N238A31856	0	0	NA	NA	Exact	Symptom onset	NA	NA	NA	NA	Exact	NA	NA	NA	NA	0	Table 2	IgG	Serum_Plasma	NA	NA	Mild_Moderate	Diseased	ELISA	NP	SARS-CoV-2	Human	General Hospital of Central Theater Command of PLA	Liu	2020	10.1101/2020.03.06.20031856	Most likely not all cases were infected	BB	2	Liu_2020_31856	N1-N238A	0	0	Exact	Symptom onset	NA	NA	NA	NA	NA	NA	Exact	NA
2	Liu_N1-N238A31856	0	0	NA	NA	Exact	Symptom onset	NA	NA	NA	NA	Exact	NA	NA	NA	NA	0.5	Table 2	IgM	Serum_Plasma	NA	NA	Mild_Moderate	Diseased	ELISA	NP	SARS-CoV-2	Human	General Hospital of Central Theater Command of PLA	Liu	2020	10.1101/2020.03.06.20031856	Most likely not all cases were infected	BB	2	Liu_2020_31856	N1-N238A	0	0	Exact	Symptom onset	NA	NA	NA	NA	NA	NA	Exact	NA
2	Liu_N1-N238A31856	0	0	NA	NA	Exact	Symptom onset	NA	NA	NA	NA	Exact	NA	NA	NA	NA	1	Table 2	Virus	Upper_respiratory	NA	NA	Mild_Moderate	Diseased	RTPCR	NA	SARS-CoV-2	Human	General Hospital of Central Theater Command of PLA	Liu	2020	10.1101/2020.03.06.20031856	Most likely not all cases were infected	BB	2	Liu_2020_31856	N1-N238A	0	0	Exact	Symptom onset	NA	NA	NA	NA	NA	NA	Exact	NA
3	Liu_N1-N238B31856	1	1	NA	NA	Exact	Symptom onset	NA	NA	NA	NA	Exact	NA	NA	NA	NA	0.333	Table 2	IgG	Serum_Plasma	NA	NA	Mild_Moderate	Diseased	ELISA	NP	SARS-CoV-2	Human	General Hospital of Central Theater Command of PLA	Liu	2020	10.1101/2020.03.06.20031856	Most likely not all cases were infected	BB	3	Liu_2020_31856	N1-N238B	1	1	Exact	Symptom onset	NA	NA	NA	NA	NA	NA	Exact	NA
3	Liu_N1-N238B31856	1	1	NA	NA	Exact	Symptom onset	NA	NA	NA	NA	Exact	NA	NA	NA	NA	0	Table 2	IgM	Serum_Plasma	NA	NA	Mild_Moderate	Diseased	ELISA	NP	SARS-CoV-2	Human	General Hospital of Central Theater Command of PLA	Liu	2020	10.1101/2020.03.06.20031856	Most likely not all cases were infected	BB	3	Liu_2020_31856	N1-N238B	1	1	Exact	Symptom onset	NA	NA	NA	NA	NA	NA	Exact	NA
6	Liu_N1-N238B31856	1	1	NA	NA	Exact	Symptom onset	NA	NA	NA	NA	Exact	NA	NA	NA	NA	0.833	Table 2	Virus	Upper_respiratory	NA	NA	Mild_Moderate	Diseased	RTPCR	NA	SARS-CoV-2	Human	General Hospital of Central Theater Command of PLA	Liu	2020	10.1101/2020.03.06.20031856	Most likely not all cases were infected	BB	6	Liu_2020_31856	N1-N238B	1	1	Exact	Symptom onset	NA	NA	NA	NA	NA	NA	Exact	NA
3	Liu_N1-N238C31856	2	2	NA	NA	Exact	Symptom onset	NA	NA	NA	NA	Exact	NA	NA	NA	NA	0	Table 2	IgG	Serum_Plasma	NA	NA	Mild_Moderate	Diseased	ELISA	NP	SARS-CoV-2	Human	General Hospital of Central Theater Command of PLA	Liu	2020	10.1101/2020.03.06.20031856	Most likely not all cases were infected	BB	3	Liu_2020_31856	N1-N238C	2	2	Exact	Symptom onset	NA	NA	NA	NA	NA	NA	Exact	NA
3	Liu_N1-N238C31856	2	2	NA	NA	Exact	Symptom onset	NA	NA	NA	NA	Exact	NA	NA	NA	NA	0	Table 2	IgM	Serum_Plasma	NA	NA	Mild_Moderate	Diseased	ELISA	NP	SARS-CoV-2	Human	General Hospital of Central Theater Command of PLA	Liu	2020	10.1101/2020.03.06.20031856	Most likely not all cases were infected	BB	3	Liu_2020_31856	N1-N238C	2	2	Exact	Symptom onset	NA	NA	NA	NA	NA	NA	Exact	NA
7	Liu_N1-N238C31856	2	2	NA	NA	Exact	Symptom onset	NA	NA	NA	NA	Exact	NA	NA	NA	NA	0.714	Table 2	Virus	Upper_respiratory	NA	NA	Mild_Moderate	Diseased	RTPCR	NA	SARS-CoV-2	Human	General Hospital of Central Theater Command of PLA	Liu	2020	10.1101/2020.03.06.20031856	Most likely not all cases were infected	BB	7	Liu_2020_31856	N1-N238C	2	2	Exact	Symptom onset	NA	NA	NA	NA	NA	NA	Exact	NA
4	Liu_N1-N238D31856	3	3	NA	NA	Exact	Symptom onset	NA	NA	NA	NA	Exact	NA	NA	NA	NA	0	Table 2	IgG	Serum_Plasma	NA	NA	Mild_Moderate	Diseased	ELISA	NP	SARS-CoV-2	Human	General Hospital of Central Theater Command of PLA	Liu	2020	10.1101/2020.03.06.20031856	Most likely not all cases were infected	BB	4	Liu_2020_31856	N1-N238D	3	3	Exact	Symptom onset	NA	NA	NA	NA	NA	NA	Exact	NA
4	Liu_N1-N238D31856	3	3	NA	NA	Exact	Symptom onset	NA	NA	NA	NA	Exact	NA	NA	NA	NA	0.25	Table 2	IgM	Serum_Plasma	NA	NA	Mild_Moderate	Diseased	ELISA	NP	SARS-CoV-2	Human	General Hospital of Central Theater Command of PLA	Liu	2020	10.1101/2020.03.06.20031856	Most likely not all cases were infected	BB	4	Liu_2020_31856	N1-N238D	3	3	Exact	Symptom onset	NA	NA	NA	NA	NA	NA	Exact	NA
13	Liu_N1-N238D31856	3	3	NA	NA	Exact	Symptom onset	NA	NA	NA	NA	Exact	NA	NA	NA	NA	0.615	Table 2	Virus	Upper_respiratory	NA	NA	Mild_Moderate	Diseased	RTPCR	NA	SARS-CoV-2	Human	General Hospital of Central Theater Command of PLA	Liu	2020	10.1101/2020.03.06.20031856	Most likely not all cases were infected	BB	13	Liu_2020_31856	N1-N238D	3	3	Exact	Symptom onset	NA	NA	NA	NA	NA	NA	Exact	NA
4	Liu_N1-N238E31856	4	4	NA	NA	Exact	Symptom onset	NA	NA	NA	NA	Exact	NA	NA	NA	NA	0	Table 2	IgG	Serum_Plasma	NA	NA	Mild_Moderate	Diseased	ELISA	NP	SARS-CoV-2	Human	General Hospital of Central Theater Command of PLA	Liu	2020	10.1101/2020.03.06.20031856	Most likely not all cases were infected	BB	4	Liu_2020_31856	N1-N238E	4	4	Exact	Symptom onset	NA	NA	NA	NA	NA	NA	Exact	NA
4	Liu_N1-N238E31856	4	4	NA	NA	Exact	Symptom onset	NA	NA	NA	NA	Exact	NA	NA	NA	NA	0	Table 2	IgM	Serum_Plasma	NA	NA	Mild_Moderate	Diseased	ELISA	NP	SARS-CoV-2	Human	General Hospital of Central Theater Command of PLA	Liu	2020	10.1101/2020.03.06.20031856	Most likely not all cases were infected	BB	4	Liu_2020_31856	N1-N238E	4	4	Exact	Symptom onset	NA	NA	NA	NA	NA	NA	Exact	NA
13	Liu_N1-N238E31856	4	4	NA	NA	Exact	Symptom onset	NA	NA	NA	NA	Exact	NA	NA	NA	NA	0.692	Table 2	Virus	Upper_respiratory	NA	NA	Mild_Moderate	Diseased	RTPCR	NA	SARS-CoV-2	Human	General Hospital of Central Theater Command of PLA	Liu	2020	10.1101/2020.03.06.20031856	Most likely not all cases were infected	BB	13	Liu_2020_31856	N1-N238E	4	4	Exact	Symptom onset	NA	NA	NA	NA	NA	NA	Exact	NA
1	Liu_N1-N238F31856	5	5	NA	NA	Exact	Symptom onset	NA	NA	NA	NA	Exact	NA	NA	NA	NA	0	Table 2	IgG	Serum_Plasma	NA	NA	Mild_Moderate	Diseased	ELISA	NP	SARS-CoV-2	Human	General Hospital of Central Theater Command of PLA	Liu	2020	10.1101/2020.03.06.20031856	Most likely not all cases were infected	BB	1	Liu_2020_31856	N1-N238F	5	5	Exact	Symptom onset	NA	NA	NA	NEG	NA	NA	Exact	NA
1	Liu_N1-N238F31856	5	5	NA	NA	Exact	Symptom onset	NA	NA	NA	NA	Exact	NA	NA	NA	NA	0	Table 2	IgM	Serum_Plasma	NA	NA	Mild_Moderate	Diseased	ELISA	NP	SARS-CoV-2	Human	General Hospital of Central Theater Command of PLA	Liu	2020	10.1101/2020.03.06.20031856	Most likely not all cases were infected	BB	1	Liu_2020_31856	N1-N238F	5	5	Exact	Symptom onset	NA	NA	NA	NEG	NA	NA	Exact	NA
13	Liu_N1-N238F31856	5	5	NA	NA	Exact	Symptom onset	NA	NA	NA	NA	Exact	NA	NA	NA	NA	0.923	Table 2	Virus	Upper_respiratory	NA	NA	Mild_Moderate	Diseased	RTPCR	NA	SARS-CoV-2	Human	General Hospital of Central Theater Command of PLA	Liu	2020	10.1101/2020.03.06.20031856	Most likely not all cases were infected	BB	13	Liu_2020_31856	N1-N238F	5	5	Exact	Symptom onset	NA	NA	NA	NA	NA	NA	Exact	NA
5	Liu_N1-N238G31856	6	6	NA	NA	Exact	Symptom onset	NA	NA	NA	NA	Exact	NA	NA	NA	NA	0	Table 2	IgG	Serum_Plasma	NA	NA	Mild_Moderate	Diseased	ELISA	NP	SARS-CoV-2	Human	General Hospital of Central Theater Command of PLA	Liu	2020	10.1101/2020.03.06.20031856	Most likely not all cases were infected	BB	5	Liu_2020_31856	N1-N238G	6	6	Exact	Symptom onset	NA	NA	NA	NA	NA	NA	Exact	NA
5	Liu_N1-N238G31856	6	6	NA	NA	Exact	Symptom onset	NA	NA	NA	NA	Exact	NA	NA	NA	NA	0	Table 2	IgM	Serum_Plasma	NA	NA	Mild_Moderate	Diseased	ELISA	NP	SARS-CoV-2	Human	General Hospital of Central Theater Command of PLA	Liu	2020	10.1101/2020.03.06.20031856	Most likely not all cases were infected	BB	5	Liu_2020_31856	N1-N238G	6	6	Exact	Symptom onset	NA	NA	NA	NA	NA	NA	Exact	NA
8	Liu_N1-N238G31856	6	6	NA	NA	Exact	Symptom onset	NA	NA	NA	NA	Exact	NA	NA	NA	NA	0.625	Table 2	Virus	Upper_respiratory	NA	NA	Mild_Moderate	Diseased	RTPCR	NA	SARS-CoV-2	Human	General Hospital of Central Theater Command of PLA	Liu	2020	10.1101/2020.03.06.20031856	Most likely not all cases were infected	BB	8	Liu_2020_31856	N1-N238G	6	6	Exact	Symptom onset	NA	NA	NA	NA	NA	NA	Exact	NA
4	Liu_N1-N238H31856	7	7	NA	NA	Exact	Symptom onset	NA	NA	NA	NA	Exact	NA	NA	NA	NA	0	Table 2	IgG	Serum_Plasma	NA	NA	Mild_Moderate	Diseased	ELISA	NP	SARS-CoV-2	Human	General Hospital of Central Theater Command of PLA	Liu	2020	10.1101/2020.03.06.20031856	Most likely not all cases were infected	BB	4	Liu_2020_31856	N1-N238H	7	7	Exact	Symptom onset	NA	NA	NA	NA	NA	NA	Exact	NA
4	Liu_N1-N238H31856	7	7	NA	NA	Exact	Symptom onset	NA	NA	NA	NA	Exact	NA	NA	NA	NA	0.25	Table 2	IgM	Serum_Plasma	NA	NA	Mild_Moderate	Diseased	ELISA	NP	SARS-CoV-2	Human	General Hospital of Central Theater Command of PLA	Liu	2020	10.1101/2020.03.06.20031856	Most likely not all cases were infected	BB	4	Liu_2020_31856	N1-N238H	7	7	Exact	Symptom onset	NA	NA	NA	NA	NA	NA	Exact	NA
9	Liu_N1-N238H31856	7	7	NA	NA	Exact	Symptom onset	NA	NA	NA	NA	Exact	NA	NA	NA	NA	0.889	Table 2	Virus	Upper_respiratory	NA	NA	Mild_Moderate	Diseased	RTPCR	NA	SARS-CoV-2	Human	General Hospital of Central Theater Command of PLA	Liu	2020	10.1101/2020.03.06.20031856	Most likely not all cases were infected	BB	9	Liu_2020_31856	N1-N238H	7	7	Exact	Symptom onset	NA	NA	NA	NA	NA	NA	Exact	NA
11	Liu_N1-N238I31856	8	8	NA	NA	Exact	Symptom onset	NA	NA	NA	NA	Exact	NA	NA	NA	NA	0	Table 2	IgG	Serum_Plasma	NA	NA	Mild_Moderate	Diseased	ELISA	NP	SARS-CoV-2	Human	General Hospital of Central Theater Command of PLA	Liu	2020	10.1101/2020.03.06.20031856	Most likely not all cases were infected	BB	11	Liu_2020_31856	N1-N238I	8	8	Exact	Symptom onset	NA	NA	NA	NA	NA	NA	Exact	NA
11	Liu_N1-N238I31856	8	8	NA	NA	Exact	Symptom onset	NA	NA	NA	NA	Exact	NA	NA	NA	NA	0.182	Table 2	IgM	Serum_Plasma	NA	NA	Mild_Moderate	Diseased	ELISA	NP	SARS-CoV-2	Human	General Hospital of Central Theater Command of PLA	Liu	2020	10.1101/2020.03.06.20031856	Most likely not all cases were infected	BB	11	Liu_2020_31856	N1-N238I	8	8	Exact	Symptom onset	NA	NA	NA	NA	NA	NA	Exact	NA
22	Liu_N1-N238I31856	8	8	NA	NA	Exact	Symptom onset	NA	NA	NA	NA	Exact	NA	NA	NA	NA	0.818	Table 2	Virus	Upper_respiratory	NA	NA	Mild_Moderate	Diseased	RTPCR	NA	SARS-CoV-2	Human	General Hospital of Central Theater Command of PLA	Liu	2020	10.1101/2020.03.06.20031856	Most likely not all cases were infected	BB	22	Liu_2020_31856	N1-N238I	8	8	Exact	Symptom onset	NA	NA	NA	NA	NA	NA	Exact	NA
14	Liu_N1-N238J31856	9	9	NA	NA	Exact	Symptom onset	NA	NA	NA	NA	Exact	NA	NA	NA	NA	0.071	Table 2	IgG	Serum_Plasma	NA	NA	Mild_Moderate	Diseased	ELISA	NP	SARS-CoV-2	Human	General Hospital of Central Theater Command of PLA	Liu	2020	10.1101/2020.03.06.20031856	Most likely not all cases were infected	BB	14	Liu_2020_31856	N1-N238J	9	9	Exact	Symptom onset	NA	NA	NA	NA	NA	NA	Exact	NA
14	Liu_N1-N238J31856	9	9	NA	NA	Exact	Symptom onset	NA	NA	NA	NA	Exact	NA	NA	NA	NA	0.071	Table 2	IgM	Serum_Plasma	NA	NA	Mild_Moderate	Diseased	ELISA	NP	SARS-CoV-2	Human	General Hospital of Central Theater Command of PLA	Liu	2020	10.1101/2020.03.06.20031856	Most likely not all cases were infected	BB	14	Liu_2020_31856	N1-N238J	9	9	Exact	Symptom onset	NA	NA	NA	NA	NA	NA	Exact	NA
20	Liu_N1-N238J31856	9	9	NA	NA	Exact	Symptom onset	NA	NA	NA	NA	Exact	NA	NA	NA	NA	0.85	Table 2	Virus	Upper_respiratory	NA	NA	Mild_Moderate	Diseased	RTPCR	NA	SARS-CoV-2	Human	General Hospital of Central Theater Command of PLA	Liu	2020	10.1101/2020.03.06.20031856	Most likely not all cases were infected	BB	20	Liu_2020_31856	N1-N238J	9	9	Exact	Symptom onset	NA	NA	NA	NA	NA	NA	Exact	NA
7	Liu_N1-N238K31856	10	10	NA	NA	Exact	Symptom onset	NA	NA	NA	NA	Exact	NA	NA	NA	NA	0	Table 2	IgG	Serum_Plasma	NA	NA	Mild_Moderate	Diseased	ELISA	NP	SARS-CoV-2	Human	General Hospital of Central Theater Command of PLA	Liu	2020	10.1101/2020.03.06.20031856	Most likely not all cases were infected	BB	7	Liu_2020_31856	N1-N238K	10	10	Exact	Symptom onset	NA	NA	NA	NA	NA	NA	Exact	NA
7	Liu_N1-N238K31856	10	10	NA	NA	Exact	Symptom onset	NA	NA	NA	NA	Exact	NA	NA	NA	NA	0.143	Table 2	IgM	Serum_Plasma	NA	NA	Mild_Moderate	Diseased	ELISA	NP	SARS-CoV-2	Human	General Hospital of Central Theater Command of PLA	Liu	2020	10.1101/2020.03.06.20031856	Most likely not all cases were infected	BB	7	Liu_2020_31856	N1-N238K	10	10	Exact	Symptom onset	NA	NA	NA	NA	NA	NA	Exact	NA
12	Liu_N1-N238K31856	10	10	NA	NA	Exact	Symptom onset	NA	NA	NA	NA	Exact	NA	NA	NA	NA	0.75	Table 2	Virus	Upper_respiratory	NA	NA	Mild_Moderate	Diseased	RTPCR	NA	SARS-CoV-2	Human	General Hospital of Central Theater Command of PLA	Liu	2020	10.1101/2020.03.06.20031856	Most likely not all cases were infected	BB	12	Liu_2020_31856	N1-N238K	10	10	Exact	Symptom onset	NA	NA	NA	NA	NA	NA	Exact	NA
11	Liu_N1-N238L31856	11	11	NA	NA	Exact	Symptom onset	NA	NA	NA	NA	Exact	NA	NA	NA	NA	0.273	Table 2	IgG	Serum_Plasma	NA	NA	Mild_Moderate	Diseased	ELISA	NP	SARS-CoV-2	Human	General Hospital of Central Theater Command of PLA	Liu	2020	10.1101/2020.03.06.20031856	Most likely not all cases were infected	BB	11	Liu_2020_31856	N1-N238L	11	11	Exact	Symptom onset	NA	NA	NA	NA	NA	NA	Exact	NA
11	Liu_N1-N238L31856	11	11	NA	NA	Exact	Symptom onset	NA	NA	NA	NA	Exact	NA	NA	NA	NA	0.182	Table 2	IgM	Serum_Plasma	NA	NA	Mild_Moderate	Diseased	ELISA	NP	SARS-CoV-2	Human	General Hospital of Central Theater Command of PLA	Liu	2020	10.1101/2020.03.06.20031856	Most likely not all cases were infected	BB	11	Liu_2020_31856	N1-N238L	11	11	Exact	Symptom onset	NA	NA	NA	NA	NA	NA	Exact	NA
18	Liu_N1-N238L31856	11	11	NA	NA	Exact	Symptom onset	NA	NA	NA	NA	Exact	NA	NA	NA	NA	0.722	Table 2	Virus	Upper_respiratory	NA	NA	Mild_Moderate	Diseased	RTPCR	NA	SARS-CoV-2	Human	General Hospital of Central Theater Command of PLA	Liu	2020	10.1101/2020.03.06.20031856	Most likely not all cases were infected	BB	18	Liu_2020_31856	N1-N238L	11	11	Exact	Symptom onset	NA	NA	NA	NA	NA	NA	Exact	NA
10	Liu_N1-N238M31856	12	12	NA	NA	Exact	Symptom onset	NA	NA	NA	NA	Exact	NA	NA	NA	NA	0.2	Table 2	IgG	Serum_Plasma	NA	NA	Mild_Moderate	Diseased	ELISA	NP	SARS-CoV-2	Human	General Hospital of Central Theater Command of PLA	Liu	2020	10.1101/2020.03.06.20031856	Most likely not all cases were infected	BB	10	Liu_2020_31856	N1-N238M	12	12	Exact	Symptom onset	NA	NA	NA	NA	NA	NA	Exact	NA
10	Liu_N1-N238M31856	12	12	NA	NA	Exact	Symptom onset	NA	NA	NA	NA	Exact	NA	NA	NA	NA	0.3	Table 2	IgM	Serum_Plasma	NA	NA	Mild_Moderate	Diseased	ELISA	NP	SARS-CoV-2	Human	General Hospital of Central Theater Command of PLA	Liu	2020	10.1101/2020.03.06.20031856	Most likely not all cases were infected	BB	10	Liu_2020_31856	N1-N238M	12	12	Exact	Symptom onset	NA	NA	NA	NA	NA	NA	Exact	NA
10	Liu_N1-N238M31856	12	12	NA	NA	Exact	Symptom onset	NA	NA	NA	NA	Exact	NA	NA	NA	NA	0.5	Table 2	Virus	Upper_respiratory	NA	NA	Mild_Moderate	Diseased	RTPCR	NA	SARS-CoV-2	Human	General Hospital of Central Theater Command of PLA	Liu	2020	10.1101/2020.03.06.20031856	Most likely not all cases were infected	BB	10	Liu_2020_31856	N1-N238M	12	12	Exact	Symptom onset	NA	NA	NA	NA	NA	NA	Exact	NA
11	Liu_N1-N238N31856	13	13	NA	NA	Exact	Symptom onset	NA	NA	NA	NA	Exact	NA	NA	NA	NA	0.091	Table 2	IgG	Serum_Plasma	NA	NA	Mild_Moderate	Diseased	ELISA	NP	SARS-CoV-2	Human	General Hospital of Central Theater Command of PLA	Liu	2020	10.1101/2020.03.06.20031856	Most likely not all cases were infected	BB	11	Liu_2020_31856	N1-N238N	13	13	Exact	Symptom onset	NA	NA	NA	NA	NA	NA	Exact	NA
11	Liu_N1-N238N31856	13	13	NA	NA	Exact	Symptom onset	NA	NA	NA	NA	Exact	NA	NA	NA	NA	0.273	Table 2	IgM	Serum_Plasma	NA	NA	Mild_Moderate	Diseased	ELISA	NP	SARS-CoV-2	Human	General Hospital of Central Theater Command of PLA	Liu	2020	10.1101/2020.03.06.20031856	Most likely not all cases were infected	BB	11	Liu_2020_31856	N1-N238N	13	13	Exact	Symptom onset	NA	NA	NA	NA	NA	NA	Exact	NA
9	Liu_N1-N238N31856	13	13	NA	NA	Exact	Symptom onset	NA	NA	NA	NA	Exact	NA	NA	NA	NA	0.444	Table 2	Virus	Upper_respiratory	NA	NA	Mild_Moderate	Diseased	RTPCR	NA	SARS-CoV-2	Human	General Hospital of Central Theater Command of PLA	Liu	2020	10.1101/2020.03.06.20031856	Most likely not all cases were infected	BB	9	Liu_2020_31856	N1-N238N	13	13	Exact	Symptom onset	NA	NA	NA	NA	NA	NA	Exact	NA
17	Liu_N1-N238O31856	14	14	NA	NA	Exact	Symptom onset	NA	NA	NA	NA	Exact	NA	NA	NA	NA	0	Table 2	IgG	Serum_Plasma	NA	NA	Mild_Moderate	Diseased	ELISA	NP	SARS-CoV-2	Human	General Hospital of Central Theater Command of PLA	Liu	2020	10.1101/2020.03.06.20031856	Most likely not all cases were infected	BB	17	Liu_2020_31856	N1-N238O	14	14	Exact	Symptom onset	NA	NA	NA	NA	NA	NA	Exact	NA
17	Liu_N1-N238O31856	14	14	NA	NA	Exact	Symptom onset	NA	NA	NA	NA	Exact	NA	NA	NA	NA	0.294	Table 2	IgM	Serum_Plasma	NA	NA	Mild_Moderate	Diseased	ELISA	NP	SARS-CoV-2	Human	General Hospital of Central Theater Command of PLA	Liu	2020	10.1101/2020.03.06.20031856	Most likely not all cases were infected	BB	17	Liu_2020_31856	N1-N238O	14	14	Exact	Symptom onset	NA	NA	NA	NA	NA	NA	Exact	NA
13	Liu_N1-N238O31856	14	14	NA	NA	Exact	Symptom onset	NA	NA	NA	NA	Exact	NA	NA	NA	NA	0.692	Table 2	Virus	Upper_respiratory	NA	NA	Mild_Moderate	Diseased	RTPCR	NA	SARS-CoV-2	Human	General Hospital of Central Theater Command of PLA	Liu	2020	10.1101/2020.03.06.20031856	Most likely not all cases were infected	BB	13	Liu_2020_31856	N1-N238O	14	14	Exact	Symptom onset	NA	NA	NA	NA	NA	NA	Exact	NA
20	Liu_N1-N238P31856	15	15	NA	NA	Exact	Symptom onset	NA	NA	NA	NA	Exact	NA	NA	NA	NA	0.15	Table 2	IgG	Serum_Plasma	NA	NA	Mild_Moderate	Diseased	ELISA	NP	SARS-CoV-2	Human	General Hospital of Central Theater Command of PLA	Liu	2020	10.1101/2020.03.06.20031856	Most likely not all cases were infected	BB	20	Liu_2020_31856	N1-N238P	15	15	Exact	Symptom onset	NA	NA	NA	NA	NA	NA	Exact	NA
20	Liu_N1-N238P31856	15	15	NA	NA	Exact	Symptom onset	NA	NA	NA	NA	Exact	NA	NA	NA	NA	0.1	Table 2	IgM	Serum_Plasma	NA	NA	Mild_Moderate	Diseased	ELISA	NP	SARS-CoV-2	Human	General Hospital of Central Theater Command of PLA	Liu	2020	10.1101/2020.03.06.20031856	Most likely not all cases were infected	BB	20	Liu_2020_31856	N1-N238P	15	15	Exact	Symptom onset	NA	NA	NA	NA	NA	NA	Exact	NA
13	Liu_N1-N238P31856	15	15	NA	NA	Exact	Symptom onset	NA	NA	NA	NA	Exact	NA	NA	NA	NA	0.308	Table 2	Virus	Upper_respiratory	NA	NA	Mild_Moderate	Diseased	RTPCR	NA	SARS-CoV-2	Human	General Hospital of Central Theater Command of PLA	Liu	2020	10.1101/2020.03.06.20031856	Most likely not all cases were infected	BB	13	Liu_2020_31856	N1-N238P	15	15	Exact	Symptom onset	NA	NA	NA	NA	NA	NA	Exact	NA
16	Liu_N1-N238Q31856	16	16	NA	NA	Exact	Symptom onset	NA	NA	NA	NA	Exact	NA	NA	NA	NA	0.25	Table 2	IgG	Serum_Plasma	NA	NA	Mild_Moderate	Diseased	ELISA	NP	SARS-CoV-2	Human	General Hospital of Central Theater Command of PLA	Liu	2020	10.1101/2020.03.06.20031856	Most likely not all cases were infected	BB	16	Liu_2020_31856	N1-N238Q	16	16	Exact	Symptom onset	NA	NA	NA	NA	NA	NA	Exact	NA
16	Liu_N1-N238Q31856	16	16	NA	NA	Exact	Symptom onset	NA	NA	NA	NA	Exact	NA	NA	NA	NA	0.125	Table 2	IgM	Serum_Plasma	NA	NA	Mild_Moderate	Diseased	ELISA	NP	SARS-CoV-2	Human	General Hospital of Central Theater Command of PLA	Liu	2020	10.1101/2020.03.06.20031856	Most likely not all cases were infected	BB	16	Liu_2020_31856	N1-N238Q	16	16	Exact	Symptom onset	NA	NA	NA	NA	NA	NA	Exact	NA
8	Liu_N1-N238Q31856	16	16	NA	NA	Exact	Symptom onset	NA	NA	NA	NA	Exact	NA	NA	NA	NA	0.5	Table 2	Virus	Upper_respiratory	NA	NA	Mild_Moderate	Diseased	RTPCR	NA	SARS-CoV-2	Human	General Hospital of Central Theater Command of PLA	Liu	2020	10.1101/2020.03.06.20031856	Most likely not all cases were infected	BB	8	Liu_2020_31856	N1-N238Q	16	16	Exact	Symptom onset	NA	NA	NA	NA	NA	NA	Exact	NA
18	Liu_N1-N238R31856	17	17	NA	NA	Exact	Symptom onset	NA	NA	NA	NA	Exact	NA	NA	NA	NA	0.056	Table 2	IgG	Serum_Plasma	NA	NA	Mild_Moderate	Diseased	ELISA	NP	SARS-CoV-2	Human	General Hospital of Central Theater Command of PLA	Liu	2020	10.1101/2020.03.06.20031856	Most likely not all cases were infected	BB	18	Liu_2020_31856	N1-N238R	17	17	Exact	Symptom onset	NA	NA	NA	NA	NA	NA	Exact	NA
18	Liu_N1-N238R31856	17	17	NA	NA	Exact	Symptom onset	NA	NA	NA	NA	Exact	NA	NA	NA	NA	0	Table 2	IgM	Serum_Plasma	NA	NA	Mild_Moderate	Diseased	ELISA	NP	SARS-CoV-2	Human	General Hospital of Central Theater Command of PLA	Liu	2020	10.1101/2020.03.06.20031856	Most likely not all cases were infected	BB	18	Liu_2020_31856	N1-N238R	17	17	Exact	Symptom onset	NA	NA	NA	NA	NA	NA	Exact	NA
7	Liu_N1-N238R31856	17	17	NA	NA	Exact	Symptom onset	NA	NA	NA	NA	Exact	NA	NA	NA	NA	0.571	Table 2	Virus	Upper_respiratory	NA	NA	Mild_Moderate	Diseased	RTPCR	NA	SARS-CoV-2	Human	General Hospital of Central Theater Command of PLA	Liu	2020	10.1101/2020.03.06.20031856	Most likely not all cases were infected	BB	7	Liu_2020_31856	N1-N238R	17	17	Exact	Symptom onset	NA	NA	NA	NA	NA	NA	Exact	NA
16	Liu_N1-N238S31856	18	18	NA	NA	Exact	Symptom onset	NA	NA	NA	NA	Exact	NA	NA	NA	NA	0.063	Table 2	IgG	Serum_Plasma	NA	NA	Mild_Moderate	Diseased	ELISA	NP	SARS-CoV-2	Human	General Hospital of Central Theater Command of PLA	Liu	2020	10.1101/2020.03.06.20031856	Most likely not all cases were infected	BB	16	Liu_2020_31856	N1-N238S	18	18	Exact	Symptom onset	NA	NA	NA	NA	NA	NA	Exact	NA
16	Liu_N1-N238S31856	18	18	NA	NA	Exact	Symptom onset	NA	NA	NA	NA	Exact	NA	NA	NA	NA	0	Table 2	IgM	Serum_Plasma	NA	NA	Mild_Moderate	Diseased	ELISA	NP	SARS-CoV-2	Human	General Hospital of Central Theater Command of PLA	Liu	2020	10.1101/2020.03.06.20031856	Most likely not all cases were infected	BB	16	Liu_2020_31856	N1-N238S	18	18	Exact	Symptom onset	NA	NA	NA	NA	NA	NA	Exact	NA
6	Liu_N1-N238S31856	18	18	NA	NA	Exact	Symptom onset	NA	NA	NA	NA	Exact	NA	NA	NA	NA	0.333	Table 2	Virus	Upper_respiratory	NA	NA	Mild_Moderate	Diseased	RTPCR	NA	SARS-CoV-2	Human	General Hospital of Central Theater Command of PLA	Liu	2020	10.1101/2020.03.06.20031856	Most likely not all cases were infected	BB	6	Liu_2020_31856	N1-N238S	18	18	Exact	Symptom onset	NA	NA	NA	NA	NA	NA	Exact	NA
19	Liu_N1-N238T31856	19	19	NA	NA	Exact	Symptom onset	NA	NA	NA	NA	Exact	NA	NA	NA	NA	0.211	Table 2	IgG	Serum_Plasma	NA	NA	Mild_Moderate	Diseased	ELISA	NP	SARS-CoV-2	Human	General Hospital of Central Theater Command of PLA	Liu	2020	10.1101/2020.03.06.20031856	Most likely not all cases were infected	BB	19	Liu_2020_31856	N1-N238T	19	19	Exact	Symptom onset	NA	NA	NA	NA	NA	NA	Exact	NA
19	Liu_N1-N238T31856	19	19	NA	NA	Exact	Symptom onset	NA	NA	NA	NA	Exact	NA	NA	NA	NA	0.105	Table 2	IgM	Serum_Plasma	NA	NA	Mild_Moderate	Diseased	ELISA	NP	SARS-CoV-2	Human	General Hospital of Central Theater Command of PLA	Liu	2020	10.1101/2020.03.06.20031856	Most likely not all cases were infected	BB	19	Liu_2020_31856	N1-N238T	19	19	Exact	Symptom onset	NA	NA	NA	NA	NA	NA	Exact	NA
9	Liu_N1-N238T31856	19	19	NA	NA	Exact	Symptom onset	NA	NA	NA	NA	Exact	NA	NA	NA	NA	0.333	Table 2	Virus	Upper_respiratory	NA	NA	Mild_Moderate	Diseased	RTPCR	NA	SARS-CoV-2	Human	General Hospital of Central Theater Command of PLA	Liu	2020	10.1101/2020.03.06.20031856	Most likely not all cases were infected	BB	9	Liu_2020_31856	N1-N238T	19	19	Exact	Symptom onset	NA	NA	NA	NA	NA	NA	Exact	NA
6	Liu_N1-N238U31856	20	20	NA	NA	Exact	Symptom onset	NA	NA	NA	NA	Exact	NA	NA	NA	NA	0.333	Table 2	IgG	Serum_Plasma	NA	NA	Mild_Moderate	Diseased	ELISA	NP	SARS-CoV-2	Human	General Hospital of Central Theater Command of PLA	Liu	2020	10.1101/2020.03.06.20031856	Most likely not all cases were infected	BB	6	Liu_2020_31856	N1-N238U	20	20	Exact	Symptom onset	NA	NA	NA	NA	NA	NA	Exact	NA
6	Liu_N1-N238U31856	20	20	NA	NA	Exact	Symptom onset	NA	NA	NA	NA	Exact	NA	NA	NA	NA	0	Table 2	IgM	Serum_Plasma	NA	NA	Mild_Moderate	Diseased	ELISA	NP	SARS-CoV-2	Human	General Hospital of Central Theater Command of PLA	Liu	2020	10.1101/2020.03.06.20031856	Most likely not all cases were infected	BB	6	Liu_2020_31856	N1-N238U	20	20	Exact	Symptom onset	NA	NA	NA	NA	NA	NA	Exact	NA
1	Liu_N1-N238U31856	20	20	NA	NA	Exact	Symptom onset	NA	NA	NA	NA	Exact	NA	NA	NA	NA	0	Table 2	Virus	Upper_respiratory	NA	NA	Mild_Moderate	Diseased	RTPCR	NA	SARS-CoV-2	Human	General Hospital of Central Theater Command of PLA	Liu	2020	10.1101/2020.03.06.20031856	Most likely not all cases were infected	BB	1	Liu_2020_31856	N1-N238U	20	20	Exact	Symptom onset	NA	NA	NA	NEG	NA	NA	Exact	NA
22	Long_BB138018	2	4	NA	NA	Period	Symptom onset	NA	NA	NA	NA	Exact	NA	NA	NA	NA	0.32	Fig 1B	IgG	Serum_Plasma	NA	NA	NA	Diseased	MCLIA	NP and Spike	SARS-CoV-2	Human	Chongqing	Long	2020	﻿10.1101/2020.03.18.20038018	NA	BB	22	Long_2020_38018	BB1	2	4	Period	Symptom onset	NA	NA	NA	NA	NA	NA	Exact	NA
22	Long_BB138018	2	4	NA	NA	Period	Symptom onset	NA	NA	NA	NA	Exact	NA	NA	NA	NA	0.14	Fig 1B	IgM	Serum_Plasma	NA	NA	NA	Diseased	MCLIA	NP and Spike	SARS-CoV-2	Human	Chongqing	Long	2020	﻿10.1101/2020.03.18.20038018	NA	BB	22	Long_2020_38018	BB1	2	4	Period	Symptom onset	NA	NA	NA	NA	NA	NA	Exact	NA
22	Long_BB138018	2	4	NA	NA	Period	Symptom onset	NA	NA	NA	NA	Exact	NA	NA	NA	NA	0.32	Fig 1B	IgG_IgM	Serum_Plasma	NA	NA	NA	Diseased	MCLIA	NP and Spike	SARS-CoV-2	Human	Chongqing	Long	2020	﻿10.1101/2020.03.18.20038018	NA	BB	22	Long_2020_38018	BB1	2	4	Period	Symptom onset	NA	NA	NA	NA	NA	NA	Exact	NA
45	Long_BB238018	5	7	NA	NA	Period	Symptom onset	NA	NA	NA	NA	Exact	NA	NA	NA	NA	0.56	Fig 1B	IgG	Serum_Plasma	NA	NA	NA	Diseased	MCLIA	NP and Spike	SARS-CoV-2	Human	Chongqing	Long	2020	﻿10.1101/2020.03.18.20038018	NA	BB	45	Long_2020_38018	BB2	5	7	Period	Symptom onset	NA	NA	NA	NA	NA	NA	Exact	NA
45	Long_BB238018	5	7	NA	NA	Period	Symptom onset	NA	NA	NA	NA	Exact	NA	NA	NA	NA	0.4	Fig 1B	IgM	Serum_Plasma	NA	NA	NA	Diseased	MCLIA	NP and Spike	SARS-CoV-2	Human	Chongqing	Long	2020	﻿10.1101/2020.03.18.20038018	NA	BB	45	Long_2020_38018	BB2	5	7	Period	Symptom onset	NA	NA	NA	NA	NA	NA	Exact	NA
45	Long_BB238018	5	7	NA	NA	Period	Symptom onset	NA	NA	NA	NA	Exact	NA	NA	NA	NA	0.6	Fig 1B	IgG_IgM	Serum_Plasma	NA	NA	NA	Diseased	MCLIA	NP and Spike	SARS-CoV-2	Human	Chongqing	Long	2020	﻿10.1101/2020.03.18.20038018	NA	BB	45	Long_2020_38018	BB2	5	7	Period	Symptom onset	NA	NA	NA	NA	NA	NA	Exact	NA
70	Long_BB338018	8	10	NA	NA	Period	Symptom onset	NA	NA	NA	NA	Exact	NA	NA	NA	NA	0.69	Fig 1B	IgG	Serum_Plasma	NA	NA	NA	Diseased	MCLIA	NP and Spike	SARS-CoV-2	Human	Chongqing	Long	2020	﻿10.1101/2020.03.18.20038018	NA	BB	70	Long_2020_38018	BB3	8	10	Period	Symptom onset	NA	NA	NA	NA	NA	NA	Exact	NA
70	Long_BB338018	8	10	NA	NA	Period	Symptom onset	NA	NA	NA	NA	Exact	NA	NA	NA	NA	0.52	Fig 1B	IgM	Serum_Plasma	NA	NA	NA	Diseased	MCLIA	NP and Spike	SARS-CoV-2	Human	Chongqing	Long	2020	﻿10.1101/2020.03.18.20038018	NA	BB	70	Long_2020_38018	BB3	8	10	Period	Symptom onset	NA	NA	NA	NA	NA	NA	Exact	NA
70	Long_BB338018	8	10	NA	NA	Period	Symptom onset	NA	NA	NA	NA	Exact	NA	NA	NA	NA	0.75	Fig 1B	IgG_IgM	Serum_Plasma	NA	NA	NA	Diseased	MCLIA	NP and Spike	SARS-CoV-2	Human	Chongqing	Long	2020	﻿10.1101/2020.03.18.20038018	NA	BB	70	Long_2020_38018	BB3	8	10	Period	Symptom onset	NA	NA	NA	NA	NA	NA	Exact	NA
79	Long_BB438018	11	13	NA	NA	Period	Symptom onset	NA	NA	NA	NA	Exact	NA	NA	NA	NA	0.85	Fig 1B	IgG	Serum_Plasma	NA	NA	NA	Diseased	MCLIA	NP and Spike	SARS-CoV-2	Human	Chongqing	Long	2020	﻿10.1101/2020.03.18.20038018	NA	BB	79	Long_2020_38018	BB4	11	13	Period	Symptom onset	NA	NA	NA	NA	NA	NA	Exact	NA
79	Long_BB438018	11	13	NA	NA	Period	Symptom onset	NA	NA	NA	NA	Exact	NA	NA	NA	NA	0.76	Fig 1B	IgM	Serum_Plasma	NA	NA	NA	Diseased	MCLIA	NP and Spike	SARS-CoV-2	Human	Chongqing	Long	2020	﻿10.1101/2020.03.18.20038018	NA	BB	79	Long_2020_38018	BB4	11	13	Period	Symptom onset	NA	NA	NA	NA	NA	NA	Exact	NA
79	Long_BB438018	11	13	NA	NA	Period	Symptom onset	NA	NA	NA	NA	Exact	NA	NA	NA	NA	0.9	Fig 1B	IgG_IgM	Serum_Plasma	NA	NA	NA	Diseased	MCLIA	NP and Spike	SARS-CoV-2	Human	Chongqing	Long	2020	﻿10.1101/2020.03.18.20038018	NA	BB	79	Long_2020_38018	BB4	11	13	Period	Symptom onset	NA	NA	NA	NA	NA	NA	Exact	NA
70	Long_BB538018	14	16	NA	NA	Period	Symptom onset	NA	NA	NA	NA	Exact	NA	NA	NA	NA	0.9	Fig 1B	IgG	Serum_Plasma	NA	NA	NA	Diseased	MCLIA	NP and Spike	SARS-CoV-2	Human	Chongqing	Long	2020	﻿10.1101/2020.03.18.20038018	NA	BB	70	Long_2020_38018	BB5	14	16	Period	Symptom onset	NA	NA	NA	NA	NA	NA	Exact	NA
70	Long_BB538018	14	16	NA	NA	Period	Symptom onset	NA	NA	NA	NA	Exact	NA	NA	NA	NA	0.79	Fig 1B	IgM	Serum_Plasma	NA	NA	NA	Diseased	MCLIA	NP and Spike	SARS-CoV-2	Human	Chongqing	Long	2020	﻿10.1101/2020.03.18.20038018	NA	BB	70	Long_2020_38018	BB5	14	16	Period	Symptom onset	NA	NA	NA	NA	NA	NA	Exact	NA
70	Long_BB538018	14	16	NA	NA	Period	Symptom onset	NA	NA	NA	NA	Exact	NA	NA	NA	NA	0.96	Fig 1B	IgG_IgM	Serum_Plasma	NA	NA	NA	Diseased	MCLIA	NP and Spike	SARS-CoV-2	Human	Chongqing	Long	2020	﻿10.1101/2020.03.18.20038018	NA	BB	70	Long_2020_38018	BB5	14	16	Period	Symptom onset	NA	NA	NA	NA	NA	NA	Exact	NA
47	Long_BB638018	17	19	NA	NA	Period	Symptom onset	NA	NA	NA	NA	Exact	NA	NA	NA	NA	1	Fig 1B	IgG	Serum_Plasma	NA	NA	NA	Diseased	MCLIA	NP and Spike	SARS-CoV-2	Human	Chongqing	Long	2020	﻿10.1101/2020.03.18.20038018	NA	BB	47	Long_2020_38018	BB6	17	19	Period	Symptom onset	NA	NA	NA	NA	NA	NA	Exact	NA
47	Long_BB638018	17	19	NA	NA	Period	Symptom onset	NA	NA	NA	NA	Exact	NA	NA	NA	NA	0.89	Fig 1B	IgM	Serum_Plasma	NA	NA	NA	Diseased	MCLIA	NP and Spike	SARS-CoV-2	Human	Chongqing	Long	2020	﻿10.1101/2020.03.18.20038018	NA	BB	47	Long_2020_38018	BB6	17	19	Period	Symptom onset	NA	NA	NA	NA	NA	NA	Exact	NA
47	Long_BB638018	17	19	NA	NA	Period	Symptom onset	NA	NA	NA	NA	Exact	NA	NA	NA	NA	1	Fig 1B	IgG_IgM	Serum_Plasma	NA	NA	NA	Diseased	MCLIA	NP and Spike	SARS-CoV-2	Human	Chongqing	Long	2020	﻿10.1101/2020.03.18.20038018	NA	BB	47	Long_2020_38018	BB6	17	19	Period	Symptom onset	NA	NA	NA	NA	NA	NA	Exact	NA
17	Long_BB738018	20	22	NA	NA	Period	Symptom onset	NA	NA	NA	NA	Exact	NA	NA	NA	NA	1	Fig 1B	IgG	Serum_Plasma	NA	NA	NA	Diseased	MCLIA	NP and Spike	SARS-CoV-2	Human	Chongqing	Long	2020	﻿10.1101/2020.03.18.20038018	NA	BB	17	Long_2020_38018	BB7	20	22	Period	Symptom onset	NA	NA	NA	NA	NA	NA	Exact	NA
17	Long_BB738018	20	22	NA	NA	Period	Symptom onset	NA	NA	NA	NA	Exact	NA	NA	NA	NA	0.94	Fig 1B	IgM	Serum_Plasma	NA	NA	NA	Diseased	MCLIA	NP and Spike	SARS-CoV-2	Human	Chongqing	Long	2020	﻿10.1101/2020.03.18.20038018	NA	BB	17	Long_2020_38018	BB7	20	22	Period	Symptom onset	NA	NA	NA	NA	NA	NA	Exact	NA
17	Long_BB738018	20	22	NA	NA	Period	Symptom onset	NA	NA	NA	NA	Exact	NA	NA	NA	NA	1	Fig 1B	IgG_IgM	Serum_Plasma	NA	NA	NA	Diseased	MCLIA	NP and Spike	SARS-CoV-2	Human	Chongqing	Long	2020	﻿10.1101/2020.03.18.20038018	NA	BB	17	Long_2020_38018	BB7	20	22	Period	Symptom onset	NA	NA	NA	NA	NA	NA	Exact	NA
13	Long_BB838018	23	NA	NA	NA	Period	Symptom onset	NA	NA	NA	NA	Exact	NA	NA	NA	NA	1	Fig1B	IgG	Serum_Plasma	NA	NA	NA	Diseased	MCLIA	NP and Spike	SARS-CoV-2	Human	Chongqing	Long	2020	﻿10.1101/2020.03.18.20038018	last period of testing, day 23 and higher; Fig1B	BB	13	Long_2020_38018	BB8	23	NA	Period	Symptom onset	NA	NA	NA	NA	NA	NA	Exact	NA
13	Long_BB838018	23	NA	NA	NA	Period	Symptom onset	NA	NA	NA	NA	Exact	NA	NA	NA	NA	0.92	Fig1B	IgM	Serum_Plasma	NA	NA	NA	Diseased	MCLIA	NP and Spike	SARS-CoV-2	Human	Chongqing	Long	2020	﻿10.1101/2020.03.18.20038018	last period of testing, day 23 and higher; Fig1B	BB	13	Long_2020_38018	BB8	23	NA	Period	Symptom onset	NA	NA	NA	NA	NA	NA	Exact	NA
13	Long_BB838018	23	NA	NA	NA	Period	Symptom onset	NA	NA	NA	NA	Exact	NA	NA	NA	NA	1	Fig1B	IgG_IgM	Serum_Plasma	NA	NA	NA	Diseased	MCLIA	NP and Spike	SARS-CoV-2	Human	Chongqing	Long	2020	﻿10.1101/2020.03.18.20038018	last period of testing, day 23 and higher; Fig1B	BB	13	Long_2020_38018	BB8	23	NA	Period	Symptom onset	NA	NA	NA	NA	NA	NA	Exact	NA
1	Long_AA138018	4	4	NA	NA	Exact	Symptom onset	NA	NA	NA	NA	Visual	NA	NA	NA	NA	NA	Fig 2 A	IgG	Serum_Plasma	NA	yes	NA	Diseased	MCLIA	NP and Spike	SARS-CoV-2	Human	Chongqing	Long	2020	﻿10.1101/2020.03.18.20038018	NA	BB	1	Long_2020_38018	AA1	4	4	Exact	Symptom onset	NA	NA	NA	POS	NA	NA	Visual	NA
1	Long_AA238018	4	4	NA	NA	Exact	Symptom onset	NA	NA	NA	NA	Visual	NA	NA	NA	NA	NA	Fig 2 A	IgG	Serum_Plasma	NA	yes	NA	Diseased	MCLIA	NP and Spike	SARS-CoV-2	Human	Chongqing	Long	2020	﻿10.1101/2020.03.18.20038018	NA	BB	1	Long_2020_38018	AA2	4	4	Exact	Symptom onset	NA	NA	NA	POS	NA	NA	Visual	NA
1	Long_AA338018	4	4	NA	NA	Exact	Symptom onset	NA	NA	NA	NA	Visual	NA	NA	NA	NA	NA	Fig 2 A	IgG	Serum_Plasma	NA	yes	NA	Diseased	MCLIA	NP and Spike	SARS-CoV-2	Human	Chongqing	Long	2020	﻿10.1101/2020.03.18.20038018	NA	BB	1	Long_2020_38018	AA3	4	4	Exact	Symptom onset	NA	NA	NA	POS	NA	NA	Visual	NA
1	Long_AA438018	6	6	NA	NA	Exact	Symptom onset	NA	NA	NA	NA	Visual	NA	NA	NA	NA	NA	Fig 2 A	IgG	Serum_Plasma	NA	yes	NA	Diseased	MCLIA	NP and Spike	SARS-CoV-2	Human	Chongqing	Long	2020	﻿10.1101/2020.03.18.20038018	NA	BB	1	Long_2020_38018	AA4	6	6	Exact	Symptom onset	NA	NA	NA	POS	NA	NA	Visual	NA
1	Long_AA538018	7	7	NA	NA	Exact	Symptom onset	NA	NA	NA	NA	Visual	NA	NA	NA	NA	NA	Fig 2 A	IgG	Serum_Plasma	NA	yes	NA	Diseased	MCLIA	NP and Spike	SARS-CoV-2	Human	Chongqing	Long	2020	﻿10.1101/2020.03.18.20038018	NA	BB	1	Long_2020_38018	AA5	7	7	Exact	Symptom onset	NA	NA	NA	POS	NA	NA	Visual	NA
1	Long_AA638018	7	7	NA	NA	Exact	Symptom onset	NA	NA	NA	NA	Visual	NA	NA	NA	NA	NA	Fig 2 A	IgG	Serum_Plasma	NA	yes	NA	Diseased	MCLIA	NP and Spike	SARS-CoV-2	Human	Chongqing	Long	2020	﻿10.1101/2020.03.18.20038018	NA	BB	1	Long_2020_38018	AA6	7	7	Exact	Symptom onset	NA	NA	NA	POS	NA	NA	Visual	NA
1	Long_AA738018	8	8	NA	NA	Exact	Symptom onset	NA	NA	NA	NA	Visual	NA	NA	NA	NA	NA	Fig 2 A	IgG	Serum_Plasma	NA	yes	NA	Diseased	MCLIA	NP and Spike	SARS-CoV-2	Human	Chongqing	Long	2020	﻿10.1101/2020.03.18.20038018	NA	BB	1	Long_2020_38018	AA7	8	8	Exact	Symptom onset	NA	NA	NA	POS	NA	NA	Visual	NA
1	Long_AA838018	8	8	NA	NA	Exact	Symptom onset	NA	NA	NA	NA	Visual	NA	NA	NA	NA	NA	Fig 2 A	IgG	Serum_Plasma	NA	yes	NA	Diseased	MCLIA	NP and Spike	SARS-CoV-2	Human	Chongqing	Long	2020	﻿10.1101/2020.03.18.20038018	NA	BB	1	Long_2020_38018	AA8	8	8	Exact	Symptom onset	NA	NA	NA	POS	NA	NA	Visual	NA
1	Long_AA938018	9	9	NA	NA	Exact	Symptom onset	NA	NA	NA	NA	Visual	NA	NA	NA	NA	NA	Fig 2 A	IgG	Serum_Plasma	NA	yes	NA	Diseased	MCLIA	NP and Spike	SARS-CoV-2	Human	Chongqing	Long	2020	﻿10.1101/2020.03.18.20038018	NA	BB	1	Long_2020_38018	AA9	9	9	Exact	Symptom onset	NA	NA	NA	POS	NA	NA	Visual	NA
1	Long_AA1038018	10	10	NA	NA	Exact	Symptom onset	NA	NA	NA	NA	Visual	NA	NA	NA	NA	NA	Fig 2 A	IgG	Serum_Plasma	NA	yes	NA	Diseased	MCLIA	NP and Spike	SARS-CoV-2	Human	Chongqing	Long	2020	﻿10.1101/2020.03.18.20038018	NA	BB	1	Long_2020_38018	AA10	10	10	Exact	Symptom onset	NA	NA	NA	POS	NA	NA	Visual	NA
1	Long_AA1138018	12	12	NA	NA	Exact	Symptom onset	NA	NA	NA	NA	Visual	NA	NA	NA	NA	NA	Fig 2 A	IgG	Serum_Plasma	NA	yes	NA	Diseased	MCLIA	NP and Spike	SARS-CoV-2	Human	Chongqing	Long	2020	﻿10.1101/2020.03.18.20038018	NA	BB	1	Long_2020_38018	AA11	12	12	Exact	Symptom onset	NA	NA	NA	POS	NA	NA	Visual	NA
1	Long_AA1238018	12	12	NA	NA	Exact	Symptom onset	NA	NA	NA	NA	Visual	NA	NA	NA	NA	NA	Fig 2 A	IgG	Serum_Plasma	NA	yes	NA	Diseased	MCLIA	NP and Spike	SARS-CoV-2	Human	Chongqing	Long	2020	﻿10.1101/2020.03.18.20038018	NA	BB	1	Long_2020_38018	AA12	12	12	Exact	Symptom onset	NA	NA	NA	POS	NA	NA	Visual	NA
1	Long_AA1338018	13	13	NA	NA	Exact	Symptom onset	NA	NA	NA	NA	Visual	NA	NA	NA	NA	NA	Fig 2 A	IgG	Serum_Plasma	NA	yes	NA	Diseased	MCLIA	NP and Spike	SARS-CoV-2	Human	Chongqing	Long	2020	﻿10.1101/2020.03.18.20038018	NA	BB	1	Long_2020_38018	AA13	13	13	Exact	Symptom onset	NA	NA	NA	POS	NA	NA	Visual	NA
1	Long_AA1438018	13	13	NA	NA	Exact	Symptom onset	NA	NA	NA	NA	Visual	NA	NA	NA	NA	NA	Fig 2 A	IgG	Serum_Plasma	NA	yes	NA	Diseased	MCLIA	NP and Spike	SARS-CoV-2	Human	Chongqing	Long	2020	﻿10.1101/2020.03.18.20038018	NA	BB	1	Long_2020_38018	AA14	13	13	Exact	Symptom onset	NA	NA	NA	POS	NA	NA	Visual	NA
1	Long_AA1538018	13	13	NA	NA	Exact	Symptom onset	NA	NA	NA	NA	Visual	NA	NA	NA	NA	NA	Fig 2 A	IgG	Serum_Plasma	NA	yes	NA	Diseased	MCLIA	NP and Spike	SARS-CoV-2	Human	Chongqing	Long	2020	﻿10.1101/2020.03.18.20038018	NA	BB	1	Long_2020_38018	AA15	13	13	Exact	Symptom onset	NA	NA	NA	POS	NA	NA	Visual	NA
1	Long_AA1638018	14	14	NA	NA	Exact	Symptom onset	NA	NA	NA	NA	Visual	NA	NA	NA	NA	NA	Fig 2 A	IgG	Serum_Plasma	NA	yes	NA	Diseased	MCLIA	NP and Spike	SARS-CoV-2	Human	Chongqing	Long	2020	﻿10.1101/2020.03.18.20038018	NA	BB	1	Long_2020_38018	AA16	14	14	Exact	Symptom onset	NA	NA	NA	POS	NA	NA	Visual	NA
1	Long_AA1738018	14	14	NA	NA	Exact	Symptom onset	NA	NA	NA	NA	Visual	NA	NA	NA	NA	NA	Fig 2 A	IgG	Serum_Plasma	NA	yes	NA	Diseased	MCLIA	NP and Spike	SARS-CoV-2	Human	Chongqing	Long	2020	﻿10.1101/2020.03.18.20038018	NA	BB	1	Long_2020_38018	AA17	14	14	Exact	Symptom onset	NA	NA	NA	POS	NA	NA	Visual	NA
1	Long_AA1838018	16	16	NA	NA	Exact	Symptom onset	NA	NA	NA	NA	Visual	NA	NA	NA	NA	NA	Fig 2 A	IgG	Serum_Plasma	NA	yes	NA	Diseased	MCLIA	NP and Spike	SARS-CoV-2	Human	Chongqing	Long	2020	﻿10.1101/2020.03.18.20038018	NA	BB	1	Long_2020_38018	AA18	16	16	Exact	Symptom onset	NA	NA	NA	POS	NA	NA	Visual	NA
1	Long_AA1938018	17	17	NA	NA	Exact	Symptom onset	NA	NA	NA	NA	Visual	NA	NA	NA	NA	NA	Fig 2 A	IgG	Serum_Plasma	NA	yes	NA	Diseased	MCLIA	NP and Spike	SARS-CoV-2	Human	Chongqing	Long	2020	﻿10.1101/2020.03.18.20038018	NA	BB	1	Long_2020_38018	AA19	17	17	Exact	Symptom onset	NA	NA	NA	POS	NA	NA	Visual	NA
1	Long_AA2038018	18	18	NA	NA	Exact	Symptom onset	NA	NA	NA	NA	Visual	NA	NA	NA	NA	NA	Fig 2 A	IgG	Serum_Plasma	NA	yes	NA	Diseased	MCLIA	NP and Spike	SARS-CoV-2	Human	Chongqing	Long	2020	﻿10.1101/2020.03.18.20038018	NA	BB	1	Long_2020_38018	AA20	18	18	Exact	Symptom onset	NA	NA	NA	POS	NA	NA	Visual	NA
1	Long_AA2138018	19	19	NA	NA	Exact	Symptom onset	NA	NA	NA	NA	Visual	NA	NA	NA	NA	NA	Fig 2 A	IgG	Serum_Plasma	NA	yes	NA	Diseased	MCLIA	NP and Spike	SARS-CoV-2	Human	Chongqing	Long	2020	﻿10.1101/2020.03.18.20038018	NA	BB	1	Long_2020_38018	AA21	19	19	Exact	Symptom onset	NA	NA	NA	POS	NA	NA	Visual	NA
1	Long_AA2238018	20	20	NA	NA	Exact	Symptom onset	NA	NA	NA	NA	Visual	NA	NA	NA	NA	NA	Fig 2 A	IgG	Serum_Plasma	NA	yes	NA	Diseased	MCLIA	NP and Spike	SARS-CoV-2	Human	Chongqing	Long	2020	﻿10.1101/2020.03.18.20038018	NA	BB	1	Long_2020_38018	AA22	20	20	Exact	Symptom onset	NA	NA	NA	POS	NA	NA	Visual	NA
1	Long_AA2338018	20	20	NA	NA	Exact	Symptom onset	NA	NA	NA	NA	Visual	NA	NA	NA	NA	NA	Fig 2 A	IgG	Serum_Plasma	NA	yes	NA	Diseased	MCLIA	NP and Spike	SARS-CoV-2	Human	Chongqing	Long	2020	﻿10.1101/2020.03.18.20038018	NA	BB	1	Long_2020_38018	AA23	20	20	Exact	Symptom onset	NA	NA	NA	POS	NA	NA	Visual	NA
1	Long_AA2438018	21	21	NA	NA	Exact	Symptom onset	NA	NA	NA	NA	Visual	NA	NA	NA	NA	NA	Fig 2 A	IgG	Serum_Plasma	NA	yes	NA	Diseased	MCLIA	NP and Spike	SARS-CoV-2	Human	Chongqing	Long	2020	﻿10.1101/2020.03.18.20038018	NA	BB	1	Long_2020_38018	AA24	21	21	Exact	Symptom onset	NA	NA	NA	POS	NA	NA	Visual	NA
1	Long_AA2538018	22	22	NA	NA	Exact	Symptom onset	NA	NA	NA	NA	Visual	NA	NA	NA	NA	NA	Fig 2 A	IgG	Serum_Plasma	NA	yes	NA	Diseased	MCLIA	NP and Spike	SARS-CoV-2	Human	Chongqing	Long	2020	﻿10.1101/2020.03.18.20038018	NA	BB	1	Long_2020_38018	AA25	22	22	Exact	Symptom onset	NA	NA	NA	POS	NA	NA	Visual	NA
1	Long_AA2638018	5	5	NA	NA	Exact	Symptom onset	NA	NA	NA	NA	Visual	NA	NA	NA	NA	NA	Fig 2 A	IgM	Serum_Plasma	NA	yes	NA	Diseased	MCLIA	NP and Spike	SARS-CoV-2	Human	Chongqing	Long	2020	﻿10.1101/2020.03.18.20038018	NA	BB	1	Long_2020_38018	AA26	5	5	Exact	Symptom onset	NA	NA	NA	POS	NA	NA	Visual	NA
1	Long_AA2738018	7	7	NA	NA	Exact	Symptom onset	NA	NA	NA	NA	Visual	NA	NA	NA	NA	NA	Fig 2 A	IgM	Serum_Plasma	NA	yes	NA	Diseased	MCLIA	NP and Spike	SARS-CoV-2	Human	Chongqing	Long	2020	﻿10.1101/2020.03.18.20038018	NA	BB	1	Long_2020_38018	AA27	7	7	Exact	Symptom onset	NA	NA	NA	POS	NA	NA	Visual	NA
1	Long_AA2838018	7	7	NA	NA	Exact	Symptom onset	NA	NA	NA	NA	Visual	NA	NA	NA	NA	NA	Fig 2 A	IgM	Serum_Plasma	NA	yes	NA	Diseased	MCLIA	NP and Spike	SARS-CoV-2	Human	Chongqing	Long	2020	﻿10.1101/2020.03.18.20038018	NA	BB	1	Long_2020_38018	AA28	7	7	Exact	Symptom onset	NA	NA	NA	POS	NA	NA	Visual	NA
1	Long_AA2938018	10	10	NA	NA	Exact	Symptom onset	NA	NA	NA	NA	Visual	NA	NA	NA	NA	NA	Fig 2 A	IgM	Serum_Plasma	NA	yes	NA	Diseased	MCLIA	NP and Spike	SARS-CoV-2	Human	Chongqing	Long	2020	﻿10.1101/2020.03.18.20038018	NA	BB	1	Long_2020_38018	AA29	10	10	Exact	Symptom onset	NA	NA	NA	POS	NA	NA	Visual	NA
1	Long_AA3038018	11	11	NA	NA	Exact	Symptom onset	NA	NA	NA	NA	Visual	NA	NA	NA	NA	NA	Fig 2 A	IgM	Serum_Plasma	NA	yes	NA	Diseased	MCLIA	NP and Spike	SARS-CoV-2	Human	Chongqing	Long	2020	﻿10.1101/2020.03.18.20038018	NA	BB	1	Long_2020_38018	AA30	11	11	Exact	Symptom onset	NA	NA	NA	POS	NA	NA	Visual	NA
1	Long_AA3138018	11	11	NA	NA	Exact	Symptom onset	NA	NA	NA	NA	Visual	NA	NA	NA	NA	NA	Fig 2 A	IgM	Serum_Plasma	NA	yes	NA	Diseased	MCLIA	NP and Spike	SARS-CoV-2	Human	Chongqing	Long	2020	﻿10.1101/2020.03.18.20038018	NA	BB	1	Long_2020_38018	AA31	11	11	Exact	Symptom onset	NA	NA	NA	POS	NA	NA	Visual	NA
1	Long_AA3238018	13	13	NA	NA	Exact	Symptom onset	NA	NA	NA	NA	Visual	NA	NA	NA	NA	NA	Fig 2 A	IgM	Serum_Plasma	NA	yes	NA	Diseased	MCLIA	NP and Spike	SARS-CoV-2	Human	Chongqing	Long	2020	﻿10.1101/2020.03.18.20038018	NA	BB	1	Long_2020_38018	AA32	13	13	Exact	Symptom onset	NA	NA	NA	POS	NA	NA	Visual	NA
1	Long_AA3338018	13	13	NA	NA	Exact	Symptom onset	NA	NA	NA	NA	Visual	NA	NA	NA	NA	NA	Fig 2 A	IgM	Serum_Plasma	NA	yes	NA	Diseased	MCLIA	NP and Spike	SARS-CoV-2	Human	Chongqing	Long	2020	﻿10.1101/2020.03.18.20038018	NA	BB	1	Long_2020_38018	AA33	13	13	Exact	Symptom onset	NA	NA	NA	POS	NA	NA	Visual	NA
1	Long_AA3438018	15	15	NA	NA	Exact	Symptom onset	NA	NA	NA	NA	Visual	NA	NA	NA	NA	NA	Fig 2 A	IgM	Serum_Plasma	NA	yes	NA	Diseased	MCLIA	NP and Spike	SARS-CoV-2	Human	Chongqing	Long	2020	﻿10.1101/2020.03.18.20038018	NA	BB	1	Long_2020_38018	AA34	15	15	Exact	Symptom onset	NA	NA	NA	POS	NA	NA	Visual	NA
1	Long_AA3538018	15	15	NA	NA	Exact	Symptom onset	NA	NA	NA	NA	Visual	NA	NA	NA	NA	NA	Fig 2 A	IgM	Serum_Plasma	NA	yes	NA	Diseased	MCLIA	NP and Spike	SARS-CoV-2	Human	Chongqing	Long	2020	﻿10.1101/2020.03.18.20038018	NA	BB	1	Long_2020_38018	AA35	15	15	Exact	Symptom onset	NA	NA	NA	POS	NA	NA	Visual	NA
1	Long_AA3638018	16	16	NA	NA	Exact	Symptom onset	NA	NA	NA	NA	Visual	NA	NA	NA	NA	NA	Fig 2 A	IgM	Serum_Plasma	NA	yes	NA	Diseased	MCLIA	NP and Spike	SARS-CoV-2	Human	Chongqing	Long	2020	﻿10.1101/2020.03.18.20038018	NA	BB	1	Long_2020_38018	AA36	16	16	Exact	Symptom onset	NA	NA	NA	POS	NA	NA	Visual	NA
1	Long_AA3738018	16	16	NA	NA	Exact	Symptom onset	NA	NA	NA	NA	Visual	NA	NA	NA	NA	NA	Fig 2 A	IgM	Serum_Plasma	NA	yes	NA	Diseased	MCLIA	NP and Spike	SARS-CoV-2	Human	Chongqing	Long	2020	﻿10.1101/2020.03.18.20038018	NA	BB	1	Long_2020_38018	AA37	16	16	Exact	Symptom onset	NA	NA	NA	POS	NA	NA	Visual	NA
1	Long_AA3838018	16	16	NA	NA	Exact	Symptom onset	NA	NA	NA	NA	Visual	NA	NA	NA	NA	NA	Fig 2 A	IgM	Serum_Plasma	NA	yes	NA	Diseased	MCLIA	NP and Spike	SARS-CoV-2	Human	Chongqing	Long	2020	﻿10.1101/2020.03.18.20038018	NA	BB	1	Long_2020_38018	AA38	16	16	Exact	Symptom onset	NA	NA	NA	POS	NA	NA	Visual	NA
1	Long_AA3938018	18	18	NA	NA	Exact	Symptom onset	NA	NA	NA	NA	Visual	NA	NA	NA	NA	NA	Fig 2 A	IgM	Serum_Plasma	NA	yes	NA	Diseased	MCLIA	NP and Spike	SARS-CoV-2	Human	Chongqing	Long	2020	﻿10.1101/2020.03.18.20038018	NA	BB	1	Long_2020_38018	AA39	18	18	Exact	Symptom onset	NA	NA	NA	POS	NA	NA	Visual	NA
1	Long_AA4038018	19	19	NA	NA	Exact	Symptom onset	NA	NA	NA	NA	Visual	NA	NA	NA	NA	NA	Fig 2 A	IgM	Serum_Plasma	NA	yes	NA	Diseased	MCLIA	NP and Spike	SARS-CoV-2	Human	Chongqing	Long	2020	﻿10.1101/2020.03.18.20038018	NA	BB	1	Long_2020_38018	AA40	19	19	Exact	Symptom onset	NA	NA	NA	POS	NA	NA	Visual	NA
1	Long_Patient1338018	7	7	NA	NA	Exact	Symptom onset	0	NA	NA	NA	Visual	2	Inf	Log 2 (chemiluminescence value divided by cutoff, +1)	NA	NA	Fig 2 B	IgG	Serum_Plasma	NA	NA	NA	Diseased	MCLIA	NP and Spike	SARS-CoV-2	Human	Chongqing	Long	2020	﻿10.1101/2020.03.18.20038018	NA	BB	1	Long_2020_38018	Patient13	7	7	Exact	Symptom onset	Log 2 (chemiluminescence value divided by cutoff, +1)	0	NA	NEG	NA	NA	Visual	2
1	Long_Patient1338018	10	10	NA	NA	Exact	Symptom onset	0	NA	NA	NA	Visual	2	Inf	Log 2 (chemiluminescence value divided by cutoff, +1)	NA	NA	Fig 2 B	IgG	Serum_Plasma	NA	NA	NA	Diseased	MCLIA	NP and Spike	SARS-CoV-2	Human	Chongqing	Long	2020	﻿10.1101/2020.03.18.20038018	NA	BB	1	Long_2020_38018	Patient13	10	10	Exact	Symptom onset	Log 2 (chemiluminescence value divided by cutoff, +1)	0	NA	NEG	NA	NA	Visual	2
1	Long_Patient1338018	13	13	NA	NA	Exact	Symptom onset	3.8	NA	NA	NA	Visual	2	Inf	Log 2 (chemiluminescence value divided by cutoff, +1)	NA	NA	Fig 2 B	IgG	Serum_Plasma	NA	NA	NA	Diseased	MCLIA	NP and Spike	SARS-CoV-2	Human	Chongqing	Long	2020	﻿10.1101/2020.03.18.20038018	NA	BB	1	Long_2020_38018	Patient13	13	13	Exact	Symptom onset	Log 2 (chemiluminescence value divided by cutoff, +1)	3.8	NA	POS	NA	NA	Visual	2
1	Long_Patient1338018	16	16	NA	NA	Exact	Symptom onset	4.8	NA	NA	NA	Visual	2	Inf	Log 2 (chemiluminescence value divided by cutoff, +1)	NA	NA	Fig 2 B	IgG	Serum_Plasma	NA	NA	NA	Diseased	MCLIA	NP and Spike	SARS-CoV-2	Human	Chongqing	Long	2020	﻿10.1101/2020.03.18.20038018	NA	BB	1	Long_2020_38018	Patient13	16	16	Exact	Symptom onset	Log 2 (chemiluminescence value divided by cutoff, +1)	4.8	NA	POS	NA	NA	Visual	2
1	Long_Patient1338018	19	19	NA	NA	Exact	Symptom onset	4.8	NA	NA	NA	Visual	2	Inf	Log 2 (chemiluminescence value divided by cutoff, +1)	NA	NA	Fig 2 B	IgG	Serum_Plasma	NA	NA	NA	Diseased	MCLIA	NP and Spike	SARS-CoV-2	Human	Chongqing	Long	2020	﻿10.1101/2020.03.18.20038018	NA	BB	1	Long_2020_38018	Patient13	19	19	Exact	Symptom onset	Log 2 (chemiluminescence value divided by cutoff, +1)	4.8	NA	POS	NA	NA	Visual	2
1	Long_Patient1338018	22	22	NA	NA	Exact	Symptom onset	4.8	NA	NA	NA	Visual	2	Inf	Log 2 (chemiluminescence value divided by cutoff, +1)	NA	NA	Fig 2 B	IgG	Serum_Plasma	NA	NA	NA	Diseased	MCLIA	NP and Spike	SARS-CoV-2	Human	Chongqing	Long	2020	﻿10.1101/2020.03.18.20038018	NA	BB	1	Long_2020_38018	Patient13	22	22	Exact	Symptom onset	Log 2 (chemiluminescence value divided by cutoff, +1)	4.8	NA	POS	NA	NA	Visual	2
1	Long_Patient1338018	25	25	NA	NA	Exact	Symptom onset	5.4	NA	NA	NA	Visual	2	Inf	Log 2 (chemiluminescence value divided by cutoff, +1)	NA	NA	Fig 2 B	IgG	Serum_Plasma	NA	NA	NA	Diseased	MCLIA	NP and Spike	SARS-CoV-2	Human	Chongqing	Long	2020	﻿10.1101/2020.03.18.20038018	NA	BB	1	Long_2020_38018	Patient13	25	25	Exact	Symptom onset	Log 2 (chemiluminescence value divided by cutoff, +1)	5.4	NA	POS	NA	NA	Visual	2
1	Long_Patient1338018	28	28	NA	NA	Exact	Symptom onset	5	NA	NA	NA	Visual	2	Inf	Log 2 (chemiluminescence value divided by cutoff, +1)	NA	NA	Fig 2 B	IgG	Serum_Plasma	NA	NA	NA	Diseased	MCLIA	NP and Spike	SARS-CoV-2	Human	Chongqing	Long	2020	﻿10.1101/2020.03.18.20038018	NA	BB	1	Long_2020_38018	Patient13	28	28	Exact	Symptom onset	Log 2 (chemiluminescence value divided by cutoff, +1)	5	NA	POS	NA	NA	Visual	2
1	Long_Patient1338018	7	7	NA	NA	Exact	Symptom onset	0	NA	NA	NA	Visual	2	Inf	Log 2 (chemiluminescence value divided by cutoff, +1)	NA	NA	Fig 2 B	IgM	Serum_Plasma	NA	NA	NA	Diseased	MCLIA	NP and Spike	SARS-CoV-2	Human	Chongqing	Long	2020	﻿10.1101/2020.03.18.20038018	NA	BB	1	Long_2020_38018	Patient13	7	7	Exact	Symptom onset	Log 2 (chemiluminescence value divided by cutoff, +1)	0	NA	NEG	NA	NA	Visual	2
1	Long_Patient1338018	10	10	NA	NA	Exact	Symptom onset	0	NA	NA	NA	Visual	2	Inf	Log 2 (chemiluminescence value divided by cutoff, +1)	NA	NA	Fig 2 B	IgM	Serum_Plasma	NA	NA	NA	Diseased	MCLIA	NP and Spike	SARS-CoV-2	Human	Chongqing	Long	2020	﻿10.1101/2020.03.18.20038018	NA	BB	1	Long_2020_38018	Patient13	10	10	Exact	Symptom onset	Log 2 (chemiluminescence value divided by cutoff, +1)	0	NA	NEG	NA	NA	Visual	2
1	Long_Patient1338018	13	13	NA	NA	Exact	Symptom onset	3	NA	NA	NA	Visual	2	Inf	Log 2 (chemiluminescence value divided by cutoff, +1)	NA	NA	Fig 2 B	IgM	Serum_Plasma	NA	NA	NA	Diseased	MCLIA	NP and Spike	SARS-CoV-2	Human	Chongqing	Long	2020	﻿10.1101/2020.03.18.20038018	NA	BB	1	Long_2020_38018	Patient13	13	13	Exact	Symptom onset	Log 2 (chemiluminescence value divided by cutoff, +1)	3	NA	POS	NA	NA	Visual	2
1	Long_Patient1338018	16	16	NA	NA	Exact	Symptom onset	3.3	NA	NA	NA	Visual	2	Inf	Log 2 (chemiluminescence value divided by cutoff, +1)	NA	NA	Fig 2 B	IgM	Serum_Plasma	NA	NA	NA	Diseased	MCLIA	NP and Spike	SARS-CoV-2	Human	Chongqing	Long	2020	﻿10.1101/2020.03.18.20038018	NA	BB	1	Long_2020_38018	Patient13	16	16	Exact	Symptom onset	Log 2 (chemiluminescence value divided by cutoff, +1)	3.3	NA	POS	NA	NA	Visual	2
1	Long_Patient1338018	19	19	NA	NA	Exact	Symptom onset	3.5	NA	NA	NA	Visual	2	Inf	Log 2 (chemiluminescence value divided by cutoff, +1)	NA	NA	Fig 2 B	IgM	Serum_Plasma	NA	NA	NA	Diseased	MCLIA	NP and Spike	SARS-CoV-2	Human	Chongqing	Long	2020	﻿10.1101/2020.03.18.20038018	NA	BB	1	Long_2020_38018	Patient13	19	19	Exact	Symptom onset	Log 2 (chemiluminescence value divided by cutoff, +1)	3.5	NA	POS	NA	NA	Visual	2
1	Long_Patient1338018	22	22	NA	NA	Exact	Symptom onset	3.4	NA	NA	NA	Visual	2	Inf	Log 2 (chemiluminescence value divided by cutoff, +1)	NA	NA	Fig 2 B	IgM	Serum_Plasma	NA	NA	NA	Diseased	MCLIA	NP and Spike	SARS-CoV-2	Human	Chongqing	Long	2020	﻿10.1101/2020.03.18.20038018	NA	BB	1	Long_2020_38018	Patient13	22	22	Exact	Symptom onset	Log 2 (chemiluminescence value divided by cutoff, +1)	3.4	NA	POS	NA	NA	Visual	2
1	Long_Patient1338018	25	25	NA	NA	Exact	Symptom onset	4	NA	NA	NA	Visual	2	Inf	Log 2 (chemiluminescence value divided by cutoff, +1)	NA	NA	Fig 2 B	IgM	Serum_Plasma	NA	NA	NA	Diseased	MCLIA	NP and Spike	SARS-CoV-2	Human	Chongqing	Long	2020	﻿10.1101/2020.03.18.20038018	NA	BB	1	Long_2020_38018	Patient13	25	25	Exact	Symptom onset	Log 2 (chemiluminescence value divided by cutoff, +1)	4	NA	POS	NA	NA	Visual	2
1	Long_Patient1338018	28	28	NA	NA	Exact	Symptom onset	3.8	NA	NA	NA	Visual	2	Inf	Log 2 (chemiluminescence value divided by cutoff, +1)	NA	NA	Fig 2 B	IgM	Serum_Plasma	NA	NA	NA	Diseased	MCLIA	NP and Spike	SARS-CoV-2	Human	Chongqing	Long	2020	﻿10.1101/2020.03.18.20038018	NA	BB	1	Long_2020_38018	Patient13	28	28	Exact	Symptom onset	Log 2 (chemiluminescence value divided by cutoff, +1)	3.8	NA	POS	NA	NA	Visual	2
1	Long_Patient1438018	7	7	NA	NA	Exact	Symptom onset	0	NA	NA	NA	Visual	2	Inf	Log 2 (chemiluminescence value divided by cutoff, +1)	NA	NA	Fig 2 B	IgG	Serum_Plasma	NA	NA	NA	Diseased	MCLIA	NP and Spike	SARS-CoV-2	Human	Chongqing	Long	2020	﻿10.1101/2020.03.18.20038018	NA	BB	1	Long_2020_38018	Patient14	7	7	Exact	Symptom onset	Log 2 (chemiluminescence value divided by cutoff, +1)	0	NA	NEG	NA	NA	Visual	2
1	Long_Patient1438018	10	10	NA	NA	Exact	Symptom onset	0	NA	NA	NA	Visual	2	Inf	Log 2 (chemiluminescence value divided by cutoff, +1)	NA	NA	Fig 2 B	IgG	Serum_Plasma	NA	NA	NA	Diseased	MCLIA	NP and Spike	SARS-CoV-2	Human	Chongqing	Long	2020	﻿10.1101/2020.03.18.20038018	NA	BB	1	Long_2020_38018	Patient14	10	10	Exact	Symptom onset	Log 2 (chemiluminescence value divided by cutoff, +1)	0	NA	NEG	NA	NA	Visual	2
1	Long_Patient1438018	13	13	NA	NA	Exact	Symptom onset	1.6	NA	NA	NA	Visual	2	Inf	Log 2 (chemiluminescence value divided by cutoff, +1)	NA	NA	Fig 2 B	IgG	Serum_Plasma	NA	NA	NA	Diseased	MCLIA	NP and Spike	SARS-CoV-2	Human	Chongqing	Long	2020	﻿10.1101/2020.03.18.20038018	NA	BB	1	Long_2020_38018	Patient14	13	13	Exact	Symptom onset	Log 2 (chemiluminescence value divided by cutoff, +1)	1.6	NA	POS	NA	NA	Visual	2
1	Long_Patient1438018	16	16	NA	NA	Exact	Symptom onset	3.4	NA	NA	NA	Visual	2	Inf	Log 2 (chemiluminescence value divided by cutoff, +1)	NA	NA	Fig 2 B	IgG	Serum_Plasma	NA	NA	NA	Diseased	MCLIA	NP and Spike	SARS-CoV-2	Human	Chongqing	Long	2020	﻿10.1101/2020.03.18.20038018	NA	BB	1	Long_2020_38018	Patient14	16	16	Exact	Symptom onset	Log 2 (chemiluminescence value divided by cutoff, +1)	3.4	NA	POS	NA	NA	Visual	2
1	Long_Patient1438018	19	19	NA	NA	Exact	Symptom onset	4.3	NA	NA	NA	Visual	2	Inf	Log 2 (chemiluminescence value divided by cutoff, +1)	NA	NA	Fig 2 B	IgG	Serum_Plasma	NA	NA	NA	Diseased	MCLIA	NP and Spike	SARS-CoV-2	Human	Chongqing	Long	2020	﻿10.1101/2020.03.18.20038018	NA	BB	1	Long_2020_38018	Patient14	19	19	Exact	Symptom onset	Log 2 (chemiluminescence value divided by cutoff, +1)	4.3	NA	POS	NA	NA	Visual	2
1	Long_Patient1438018	22	22	NA	NA	Exact	Symptom onset	4.5	NA	NA	NA	Visual	2	Inf	Log 2 (chemiluminescence value divided by cutoff, +1)	NA	NA	Fig 2 B	IgG	Serum_Plasma	NA	NA	NA	Diseased	MCLIA	NP and Spike	SARS-CoV-2	Human	Chongqing	Long	2020	﻿10.1101/2020.03.18.20038018	NA	BB	1	Long_2020_38018	Patient14	22	22	Exact	Symptom onset	Log 2 (chemiluminescence value divided by cutoff, +1)	4.5	NA	POS	NA	NA	Visual	2
1	Long_Patient1438018	25	25	NA	NA	Exact	Symptom onset	4.3	NA	NA	NA	Visual	2	Inf	Log 2 (chemiluminescence value divided by cutoff, +1)	NA	NA	Fig 2 B	IgG	Serum_Plasma	NA	NA	NA	Diseased	MCLIA	NP and Spike	SARS-CoV-2	Human	Chongqing	Long	2020	﻿10.1101/2020.03.18.20038018	NA	BB	1	Long_2020_38018	Patient14	25	25	Exact	Symptom onset	Log 2 (chemiluminescence value divided by cutoff, +1)	4.3	NA	POS	NA	NA	Visual	2
1	Long_Patient1438018	7	7	NA	NA	Exact	Symptom onset	0	NA	NA	NA	Visual	2	Inf	Log 2 (chemiluminescence value divided by cutoff, +1)	NA	NA	Fig 2 B	IgM	Serum_Plasma	NA	NA	NA	Diseased	MCLIA	NP and Spike	SARS-CoV-2	Human	Chongqing	Long	2020	﻿10.1101/2020.03.18.20038018	NA	BB	1	Long_2020_38018	Patient14	7	7	Exact	Symptom onset	Log 2 (chemiluminescence value divided by cutoff, +1)	0	NA	NEG	NA	NA	Visual	2
1	Long_Patient1438018	10	10	NA	NA	Exact	Symptom onset	0	NA	NA	NA	Visual	2	Inf	Log 2 (chemiluminescence value divided by cutoff, +1)	NA	NA	Fig 2 B	IgM	Serum_Plasma	NA	NA	NA	Diseased	MCLIA	NP and Spike	SARS-CoV-2	Human	Chongqing	Long	2020	﻿10.1101/2020.03.18.20038018	NA	BB	1	Long_2020_38018	Patient14	10	10	Exact	Symptom onset	Log 2 (chemiluminescence value divided by cutoff, +1)	0	NA	NEG	NA	NA	Visual	2
1	Long_Patient1438018	13	13	NA	NA	Exact	Symptom onset	1.1	NA	NA	NA	Visual	2	Inf	Log 2 (chemiluminescence value divided by cutoff, +1)	NA	NA	Fig 2 B	IgM	Serum_Plasma	NA	NA	NA	Diseased	MCLIA	NP and Spike	SARS-CoV-2	Human	Chongqing	Long	2020	﻿10.1101/2020.03.18.20038018	NA	BB	1	Long_2020_38018	Patient14	13	13	Exact	Symptom onset	Log 2 (chemiluminescence value divided by cutoff, +1)	1.1	NA	POS	NA	NA	Visual	2
1	Long_Patient1438018	16	16	NA	NA	Exact	Symptom onset	2.6	NA	NA	NA	Visual	2	Inf	Log 2 (chemiluminescence value divided by cutoff, +1)	NA	NA	Fig 2 B	IgM	Serum_Plasma	NA	NA	NA	Diseased	MCLIA	NP and Spike	SARS-CoV-2	Human	Chongqing	Long	2020	﻿10.1101/2020.03.18.20038018	NA	BB	1	Long_2020_38018	Patient14	16	16	Exact	Symptom onset	Log 2 (chemiluminescence value divided by cutoff, +1)	2.6	NA	POS	NA	NA	Visual	2
1	Long_Patient1438018	19	19	NA	NA	Exact	Symptom onset	2.9	NA	NA	NA	Visual	2	Inf	Log 2 (chemiluminescence value divided by cutoff, +1)	NA	NA	Fig 2 B	IgM	Serum_Plasma	NA	NA	NA	Diseased	MCLIA	NP and Spike	SARS-CoV-2	Human	Chongqing	Long	2020	﻿10.1101/2020.03.18.20038018	NA	BB	1	Long_2020_38018	Patient14	19	19	Exact	Symptom onset	Log 2 (chemiluminescence value divided by cutoff, +1)	2.9	NA	POS	NA	NA	Visual	2
1	Long_Patient1438018	22	22	NA	NA	Exact	Symptom onset	3	NA	NA	NA	Visual	2	Inf	Log 2 (chemiluminescence value divided by cutoff, +1)	NA	NA	Fig 2 B	IgM	Serum_Plasma	NA	NA	NA	Diseased	MCLIA	NP and Spike	SARS-CoV-2	Human	Chongqing	Long	2020	﻿10.1101/2020.03.18.20038018	NA	BB	1	Long_2020_38018	Patient14	22	22	Exact	Symptom onset	Log 2 (chemiluminescence value divided by cutoff, +1)	3	NA	POS	NA	NA	Visual	2
1	Long_Patient1438018	25	25	NA	NA	Exact	Symptom onset	3.1	NA	NA	NA	Visual	2	Inf	Log 2 (chemiluminescence value divided by cutoff, +1)	NA	NA	Fig 2 B	IgM	Serum_Plasma	NA	NA	NA	Diseased	MCLIA	NP and Spike	SARS-CoV-2	Human	Chongqing	Long	2020	﻿10.1101/2020.03.18.20038018	NA	BB	1	Long_2020_38018	Patient14	25	25	Exact	Symptom onset	Log 2 (chemiluminescence value divided by cutoff, +1)	3.1	NA	POS	NA	NA	Visual	2
1	Long_Patient1538018	10	10	NA	NA	Exact	Symptom onset	2	NA	NA	NA	Visual	2	Inf	Log 2 (chemiluminescence value divided by cutoff, +1)	NA	NA	Fig 2 C	IgG	Serum_Plasma	NA	NA	NA	Diseased	MCLIA	NP and Spike	SARS-CoV-2	Human	Chongqing	Long	2020	﻿10.1101/2020.03.18.20038018	NA	BB	1	Long_2020_38018	Patient15	10	10	Exact	Symptom onset	Log 2 (chemiluminescence value divided by cutoff, +1)	2	NA	POS	NA	NA	Visual	2
1	Long_Patient1538018	13	13	NA	NA	Exact	Symptom onset	2.5	NA	NA	NA	Visual	2	Inf	Log 2 (chemiluminescence value divided by cutoff, +1)	NA	NA	Fig 2 C	IgG	Serum_Plasma	NA	NA	NA	Diseased	MCLIA	NP and Spike	SARS-CoV-2	Human	Chongqing	Long	2020	﻿10.1101/2020.03.18.20038018	NA	BB	1	Long_2020_38018	Patient15	13	13	Exact	Symptom onset	Log 2 (chemiluminescence value divided by cutoff, +1)	2.5	NA	POS	NA	NA	Visual	2
1	Long_Patient1538018	16	16	NA	NA	Exact	Symptom onset	3	NA	NA	NA	Visual	2	Inf	Log 2 (chemiluminescence value divided by cutoff, +1)	NA	NA	Fig 2 C	IgG	Serum_Plasma	NA	NA	NA	Diseased	MCLIA	NP and Spike	SARS-CoV-2	Human	Chongqing	Long	2020	﻿10.1101/2020.03.18.20038018	NA	BB	1	Long_2020_38018	Patient15	16	16	Exact	Symptom onset	Log 2 (chemiluminescence value divided by cutoff, +1)	3	NA	POS	NA	NA	Visual	2
1	Long_Patient1538018	19	19	NA	NA	Exact	Symptom onset	2.9	NA	NA	NA	Visual	2	Inf	Log 2 (chemiluminescence value divided by cutoff, +1)	NA	NA	Fig 2 C	IgG	Serum_Plasma	NA	NA	NA	Diseased	MCLIA	NP and Spike	SARS-CoV-2	Human	Chongqing	Long	2020	﻿10.1101/2020.03.18.20038018	NA	BB	1	Long_2020_38018	Patient15	19	19	Exact	Symptom onset	Log 2 (chemiluminescence value divided by cutoff, +1)	2.9	NA	POS	NA	NA	Visual	2
1	Long_Patient1538018	22	22	NA	NA	Exact	Symptom onset	2.8	NA	NA	NA	Visual	2	Inf	Log 2 (chemiluminescence value divided by cutoff, +1)	NA	NA	Fig 2 C	IgG	Serum_Plasma	NA	NA	NA	Diseased	MCLIA	NP and Spike	SARS-CoV-2	Human	Chongqing	Long	2020	﻿10.1101/2020.03.18.20038018	NA	BB	1	Long_2020_38018	Patient15	22	22	Exact	Symptom onset	Log 2 (chemiluminescence value divided by cutoff, +1)	2.8	NA	POS	NA	NA	Visual	2
1	Long_Patient1538018	10	10	NA	NA	Exact	Symptom onset	0	NA	NA	NA	Visual	2	Inf	Log 2 (chemiluminescence value divided by cutoff, +1)	NA	NA	Fig 2 C	IgM	Serum_Plasma	NA	NA	NA	Diseased	MCLIA	NP and Spike	SARS-CoV-2	Human	Chongqing	Long	2020	﻿10.1101/2020.03.18.20038018	NA	BB	1	Long_2020_38018	Patient15	10	10	Exact	Symptom onset	Log 2 (chemiluminescence value divided by cutoff, +1)	0	NA	NEG	NA	NA	Visual	2
1	Long_Patient1538018	13	13	NA	NA	Exact	Symptom onset	2	NA	NA	NA	Visual	2	Inf	Log 2 (chemiluminescence value divided by cutoff, +1)	NA	NA	Fig 2 C	IgM	Serum_Plasma	NA	NA	NA	Diseased	MCLIA	NP and Spike	SARS-CoV-2	Human	Chongqing	Long	2020	﻿10.1101/2020.03.18.20038018	NA	BB	1	Long_2020_38018	Patient15	13	13	Exact	Symptom onset	Log 2 (chemiluminescence value divided by cutoff, +1)	2	NA	POS	NA	NA	Visual	2
1	Long_Patient1538018	16	16	NA	NA	Exact	Symptom onset	3	NA	NA	NA	Visual	2	Inf	Log 2 (chemiluminescence value divided by cutoff, +1)	NA	NA	Fig 2 C	IgM	Serum_Plasma	NA	NA	NA	Diseased	MCLIA	NP and Spike	SARS-CoV-2	Human	Chongqing	Long	2020	﻿10.1101/2020.03.18.20038018	NA	BB	1	Long_2020_38018	Patient15	16	16	Exact	Symptom onset	Log 2 (chemiluminescence value divided by cutoff, +1)	3	NA	POS	NA	NA	Visual	2
1	Long_Patient1538018	19	19	NA	NA	Exact	Symptom onset	3.1	NA	NA	NA	Visual	2	Inf	Log 2 (chemiluminescence value divided by cutoff, +1)	NA	NA	Fig 2 C	IgM	Serum_Plasma	NA	NA	NA	Diseased	MCLIA	NP and Spike	SARS-CoV-2	Human	Chongqing	Long	2020	﻿10.1101/2020.03.18.20038018	NA	BB	1	Long_2020_38018	Patient15	19	19	Exact	Symptom onset	Log 2 (chemiluminescence value divided by cutoff, +1)	3.1	NA	POS	NA	NA	Visual	2
1	Long_Patient1538018	22	22	NA	NA	Exact	Symptom onset	3.7	NA	NA	NA	Visual	2	Inf	Log 2 (chemiluminescence value divided by cutoff, +1)	NA	NA	Fig 2 C	IgM	Serum_Plasma	NA	NA	NA	Diseased	MCLIA	NP and Spike	SARS-CoV-2	Human	Chongqing	Long	2020	﻿10.1101/2020.03.18.20038018	NA	BB	1	Long_2020_38018	Patient15	22	22	Exact	Symptom onset	Log 2 (chemiluminescence value divided by cutoff, +1)	3.7	NA	POS	NA	NA	Visual	2
1	Long_Patient1838018	5	5	NA	NA	Exact	Symptom onset	0	NA	NA	NA	Visual	2	Inf	Log 2 (chemiluminescence value divided by cutoff, +1)	NA	NA	Fig 2 C	IgG	Serum_Plasma	NA	NA	NA	Diseased	MCLIA	NP and Spike	SARS-CoV-2	Human	Chongqing	Long	2020	﻿10.1101/2020.03.18.20038018	NA	BB	1	Long_2020_38018	Patient18	5	5	Exact	Symptom onset	Log 2 (chemiluminescence value divided by cutoff, +1)	0	NA	NEG	NA	NA	Visual	2
1	Long_Patient1838018	8	8	NA	NA	Exact	Symptom onset	0	NA	NA	NA	Visual	2	Inf	Log 2 (chemiluminescence value divided by cutoff, +1)	NA	NA	Fig 2 C	IgG	Serum_Plasma	NA	NA	NA	Diseased	MCLIA	NP and Spike	SARS-CoV-2	Human	Chongqing	Long	2020	﻿10.1101/2020.03.18.20038018	NA	BB	1	Long_2020_38018	Patient18	8	8	Exact	Symptom onset	Log 2 (chemiluminescence value divided by cutoff, +1)	0	NA	NEG	NA	NA	Visual	2
1	Long_Patient1838018	11	11	NA	NA	Exact	Symptom onset	0	NA	NA	NA	Visual	2	Inf	Log 2 (chemiluminescence value divided by cutoff, +1)	NA	NA	Fig 2 C	IgG	Serum_Plasma	NA	NA	NA	Diseased	MCLIA	NP and Spike	SARS-CoV-2	Human	Chongqing	Long	2020	﻿10.1101/2020.03.18.20038018	NA	BB	1	Long_2020_38018	Patient18	11	11	Exact	Symptom onset	Log 2 (chemiluminescence value divided by cutoff, +1)	0	NA	NEG	NA	NA	Visual	2
1	Long_Patient1838018	14	14	NA	NA	Exact	Symptom onset	2.1	NA	NA	NA	Visual	2	Inf	Log 2 (chemiluminescence value divided by cutoff, +1)	NA	NA	Fig 2 C	IgG	Serum_Plasma	NA	NA	NA	Diseased	MCLIA	NP and Spike	SARS-CoV-2	Human	Chongqing	Long	2020	﻿10.1101/2020.03.18.20038018	NA	BB	1	Long_2020_38018	Patient18	14	14	Exact	Symptom onset	Log 2 (chemiluminescence value divided by cutoff, +1)	2.1	NA	POS	NA	NA	Visual	2
1	Long_Patient1838018	17	17	NA	NA	Exact	Symptom onset	3.5	NA	NA	NA	Visual	2	Inf	Log 2 (chemiluminescence value divided by cutoff, +1)	NA	NA	Fig 2 C	IgG	Serum_Plasma	NA	NA	NA	Diseased	MCLIA	NP and Spike	SARS-CoV-2	Human	Chongqing	Long	2020	﻿10.1101/2020.03.18.20038018	NA	BB	1	Long_2020_38018	Patient18	17	17	Exact	Symptom onset	Log 2 (chemiluminescence value divided by cutoff, +1)	3.5	NA	POS	NA	NA	Visual	2
1	Long_Patient1838018	20	20	NA	NA	Exact	Symptom onset	3.6	NA	NA	NA	Visual	2	Inf	Log 2 (chemiluminescence value divided by cutoff, +1)	NA	NA	Fig 2 C	IgG	Serum_Plasma	NA	NA	NA	Diseased	MCLIA	NP and Spike	SARS-CoV-2	Human	Chongqing	Long	2020	﻿10.1101/2020.03.18.20038018	NA	BB	1	Long_2020_38018	Patient18	20	20	Exact	Symptom onset	Log 2 (chemiluminescence value divided by cutoff, +1)	3.6	NA	POS	NA	NA	Visual	2
1	Long_Patient1838018	5	5	NA	NA	Exact	Symptom onset	0	NA	NA	NA	Visual	2	Inf	Log 2 (chemiluminescence value divided by cutoff, +1)	NA	NA	Fig 2 C	IgM	Serum_Plasma	NA	NA	NA	Diseased	MCLIA	NP and Spike	SARS-CoV-2	Human	Chongqing	Long	2020	﻿10.1101/2020.03.18.20038018	NA	BB	1	Long_2020_38018	Patient18	5	5	Exact	Symptom onset	Log 2 (chemiluminescence value divided by cutoff, +1)	0	NA	NEG	NA	NA	Visual	2
1	Long_Patient1838018	8	8	NA	NA	Exact	Symptom onset	0	NA	NA	NA	Visual	2	Inf	Log 2 (chemiluminescence value divided by cutoff, +1)	NA	NA	Fig 2 C	IgM	Serum_Plasma	NA	NA	NA	Diseased	MCLIA	NP and Spike	SARS-CoV-2	Human	Chongqing	Long	2020	﻿10.1101/2020.03.18.20038018	NA	BB	1	Long_2020_38018	Patient18	8	8	Exact	Symptom onset	Log 2 (chemiluminescence value divided by cutoff, +1)	0	NA	NEG	NA	NA	Visual	2
1	Long_Patient1838018	11	11	NA	NA	Exact	Symptom onset	1.9	NA	NA	NA	Visual	2	Inf	Log 2 (chemiluminescence value divided by cutoff, +1)	NA	NA	Fig 2 C	IgM	Serum_Plasma	NA	NA	NA	Diseased	MCLIA	NP and Spike	SARS-CoV-2	Human	Chongqing	Long	2020	﻿10.1101/2020.03.18.20038018	NA	BB	1	Long_2020_38018	Patient18	11	11	Exact	Symptom onset	Log 2 (chemiluminescence value divided by cutoff, +1)	1.9	NA	POS	NA	NA	Visual	2
1	Long_Patient1838018	14	14	NA	NA	Exact	Symptom onset	2.4	NA	NA	NA	Visual	2	Inf	Log 2 (chemiluminescence value divided by cutoff, +1)	NA	NA	Fig 2 C	IgM	Serum_Plasma	NA	NA	NA	Diseased	MCLIA	NP and Spike	SARS-CoV-2	Human	Chongqing	Long	2020	﻿10.1101/2020.03.18.20038018	NA	BB	1	Long_2020_38018	Patient18	14	14	Exact	Symptom onset	Log 2 (chemiluminescence value divided by cutoff, +1)	2.4	NA	POS	NA	NA	Visual	2
1	Long_Patient1838018	17	17	NA	NA	Exact	Symptom onset	2.5	NA	NA	NA	Visual	2	Inf	Log 2 (chemiluminescence value divided by cutoff, +1)	NA	NA	Fig 2 C	IgM	Serum_Plasma	NA	NA	NA	Diseased	MCLIA	NP and Spike	SARS-CoV-2	Human	Chongqing	Long	2020	﻿10.1101/2020.03.18.20038018	NA	BB	1	Long_2020_38018	Patient18	17	17	Exact	Symptom onset	Log 2 (chemiluminescence value divided by cutoff, +1)	2.5	NA	POS	NA	NA	Visual	2
1	Long_Patient1838018	20	20	NA	NA	Exact	Symptom onset	2.5	NA	NA	NA	Visual	2	Inf	Log 2 (chemiluminescence value divided by cutoff, +1)	NA	NA	Fig 2 C	IgM	Serum_Plasma	NA	NA	NA	Diseased	MCLIA	NP and Spike	SARS-CoV-2	Human	Chongqing	Long	2020	﻿10.1101/2020.03.18.20038018	NA	BB	1	Long_2020_38018	Patient18	20	20	Exact	Symptom onset	Log 2 (chemiluminescence value divided by cutoff, +1)	2.5	NA	POS	NA	NA	Visual	2
1	Long_Patient1038018	10	10	NA	NA	Exact	Symptom onset	3	NA	NA	NA	Visual	2	Inf	Log 2 (chemiluminescence value divided by cutoff, +1)	NA	NA	Fig 2 D	IgG	Serum_Plasma	NA	NA	NA	Diseased	MCLIA	NP and Spike	SARS-CoV-2	Human	Chongqing	Long	2020	﻿10.1101/2020.03.18.20038018	NA	BB	1	Long_2020_38018	Patient10	10	10	Exact	Symptom onset	Log 2 (chemiluminescence value divided by cutoff, +1)	3	NA	POS	NA	NA	Visual	2
1	Long_Patient1038018	13	13	NA	NA	Exact	Symptom onset	5.9	NA	NA	NA	Visual	2	Inf	Log 2 (chemiluminescence value divided by cutoff, +1)	NA	NA	Fig 2 D	IgG	Serum_Plasma	NA	NA	NA	Diseased	MCLIA	NP and Spike	SARS-CoV-2	Human	Chongqing	Long	2020	﻿10.1101/2020.03.18.20038018	NA	BB	1	Long_2020_38018	Patient10	13	13	Exact	Symptom onset	Log 2 (chemiluminescence value divided by cutoff, +1)	5.9	NA	POS	NA	NA	Visual	2
1	Long_Patient1038018	16	16	NA	NA	Exact	Symptom onset	6	NA	NA	NA	Visual	2	Inf	Log 2 (chemiluminescence value divided by cutoff, +1)	NA	NA	Fig 2 D	IgG	Serum_Plasma	NA	NA	NA	Diseased	MCLIA	NP and Spike	SARS-CoV-2	Human	Chongqing	Long	2020	﻿10.1101/2020.03.18.20038018	NA	BB	1	Long_2020_38018	Patient10	16	16	Exact	Symptom onset	Log 2 (chemiluminescence value divided by cutoff, +1)	6	NA	POS	NA	NA	Visual	2
1	Long_Patient1038018	19	19	NA	NA	Exact	Symptom onset	5.5	NA	NA	NA	Visual	2	Inf	Log 2 (chemiluminescence value divided by cutoff, +1)	NA	NA	Fig 2 D	IgG	Serum_Plasma	NA	NA	NA	Diseased	MCLIA	NP and Spike	SARS-CoV-2	Human	Chongqing	Long	2020	﻿10.1101/2020.03.18.20038018	NA	BB	1	Long_2020_38018	Patient10	19	19	Exact	Symptom onset	Log 2 (chemiluminescence value divided by cutoff, +1)	5.5	NA	POS	NA	NA	Visual	2
1	Long_Patient1038018	22	22	NA	NA	Exact	Symptom onset	5	NA	NA	NA	Visual	2	Inf	Log 2 (chemiluminescence value divided by cutoff, +1)	NA	NA	Fig 2 D	IgG	Serum_Plasma	NA	NA	NA	Diseased	MCLIA	NP and Spike	SARS-CoV-2	Human	Chongqing	Long	2020	﻿10.1101/2020.03.18.20038018	NA	BB	1	Long_2020_38018	Patient10	22	22	Exact	Symptom onset	Log 2 (chemiluminescence value divided by cutoff, +1)	5	NA	POS	NA	NA	Visual	2
1	Long_Patient1038018	10	10	NA	NA	Exact	Symptom onset	0	NA	NA	NA	Visual	2	Inf	Log 2 (chemiluminescence value divided by cutoff, +1)	NA	NA	Fig 2 D	IgM	Serum_Plasma	NA	NA	NA	Diseased	MCLIA	NP and Spike	SARS-CoV-2	Human	Chongqing	Long	2020	﻿10.1101/2020.03.18.20038018	NA	BB	1	Long_2020_38018	Patient10	10	10	Exact	Symptom onset	Log 2 (chemiluminescence value divided by cutoff, +1)	0	NA	NEG	NA	NA	Visual	2
1	Long_Patient1038018	13	13	NA	NA	Exact	Symptom onset	2.4	NA	NA	NA	Visual	2	Inf	Log 2 (chemiluminescence value divided by cutoff, +1)	NA	NA	Fig 2 D	IgM	Serum_Plasma	NA	NA	NA	Diseased	MCLIA	NP and Spike	SARS-CoV-2	Human	Chongqing	Long	2020	﻿10.1101/2020.03.18.20038018	NA	BB	1	Long_2020_38018	Patient10	13	13	Exact	Symptom onset	Log 2 (chemiluminescence value divided by cutoff, +1)	2.4	NA	POS	NA	NA	Visual	2
1	Long_Patient1038018	16	16	NA	NA	Exact	Symptom onset	2.1	NA	NA	NA	Visual	2	Inf	Log 2 (chemiluminescence value divided by cutoff, +1)	NA	NA	Fig 2 D	IgM	Serum_Plasma	NA	NA	NA	Diseased	MCLIA	NP and Spike	SARS-CoV-2	Human	Chongqing	Long	2020	﻿10.1101/2020.03.18.20038018	NA	BB	1	Long_2020_38018	Patient10	16	16	Exact	Symptom onset	Log 2 (chemiluminescence value divided by cutoff, +1)	2.1	NA	POS	NA	NA	Visual	2
1	Long_Patient1038018	19	19	NA	NA	Exact	Symptom onset	2.9	NA	NA	NA	Visual	2	Inf	Log 2 (chemiluminescence value divided by cutoff, +1)	NA	NA	Fig 2 D	IgM	Serum_Plasma	NA	NA	NA	Diseased	MCLIA	NP and Spike	SARS-CoV-2	Human	Chongqing	Long	2020	﻿10.1101/2020.03.18.20038018	NA	BB	1	Long_2020_38018	Patient10	19	19	Exact	Symptom onset	Log 2 (chemiluminescence value divided by cutoff, +1)	2.9	NA	POS	NA	NA	Visual	2
1	Long_Patient1038018	22	22	NA	NA	Exact	Symptom onset	2.5	NA	NA	NA	Visual	2	Inf	Log 2 (chemiluminescence value divided by cutoff, +1)	NA	NA	Fig 2 D	IgM	Serum_Plasma	NA	NA	NA	Diseased	MCLIA	NP and Spike	SARS-CoV-2	Human	Chongqing	Long	2020	﻿10.1101/2020.03.18.20038018	NA	BB	1	Long_2020_38018	Patient10	22	22	Exact	Symptom onset	Log 2 (chemiluminescence value divided by cutoff, +1)	2.5	NA	POS	NA	NA	Visual	2
1	Long_Patient238018	4	4	NA	NA	Exact	Symptom onset	2.2	NA	NA	NA	Visual	2	Inf	Log 2 (chemiluminescence value divided by cutoff, +1)	NA	NA	Fig 2 D	IgG	Serum_Plasma	NA	NA	NA	Diseased	MCLIA	NP and Spike	SARS-CoV-2	Human	Chongqing	Long	2020	﻿10.1101/2020.03.18.20038018	NA	BB	1	Long_2020_38018	Patient2	4	4	Exact	Symptom onset	Log 2 (chemiluminescence value divided by cutoff, +1)	2.2	NA	POS	NA	NA	Visual	2
1	Long_Patient238018	7	7	NA	NA	Exact	Symptom onset	6.1	NA	NA	NA	Visual	2	Inf	Log 2 (chemiluminescence value divided by cutoff, +1)	NA	NA	Fig 2 D	IgG	Serum_Plasma	NA	NA	NA	Diseased	MCLIA	NP and Spike	SARS-CoV-2	Human	Chongqing	Long	2020	﻿10.1101/2020.03.18.20038018	NA	BB	1	Long_2020_38018	Patient2	7	7	Exact	Symptom onset	Log 2 (chemiluminescence value divided by cutoff, +1)	6.1	NA	POS	NA	NA	Visual	2
1	Long_Patient238018	10	10	NA	NA	Exact	Symptom onset	6.8	NA	NA	NA	Visual	2	Inf	Log 2 (chemiluminescence value divided by cutoff, +1)	NA	NA	Fig 2 D	IgG	Serum_Plasma	NA	NA	NA	Diseased	MCLIA	NP and Spike	SARS-CoV-2	Human	Chongqing	Long	2020	﻿10.1101/2020.03.18.20038018	NA	BB	1	Long_2020_38018	Patient2	10	10	Exact	Symptom onset	Log 2 (chemiluminescence value divided by cutoff, +1)	6.8	NA	POS	NA	NA	Visual	2
1	Long_Patient238018	13	13	NA	NA	Exact	Symptom onset	6.6	NA	NA	NA	Visual	2	Inf	Log 2 (chemiluminescence value divided by cutoff, +1)	NA	NA	Fig 2 D	IgG	Serum_Plasma	NA	NA	NA	Diseased	MCLIA	NP and Spike	SARS-CoV-2	Human	Chongqing	Long	2020	﻿10.1101/2020.03.18.20038018	NA	BB	1	Long_2020_38018	Patient2	13	13	Exact	Symptom onset	Log 2 (chemiluminescence value divided by cutoff, +1)	6.6	NA	POS	NA	NA	Visual	2
1	Long_Patient238018	16	16	NA	NA	Exact	Symptom onset	6.5	NA	NA	NA	Visual	2	Inf	Log 2 (chemiluminescence value divided by cutoff, +1)	NA	NA	Fig 2 D	IgG	Serum_Plasma	NA	NA	NA	Diseased	MCLIA	NP and Spike	SARS-CoV-2	Human	Chongqing	Long	2020	﻿10.1101/2020.03.18.20038018	NA	BB	1	Long_2020_38018	Patient2	16	16	Exact	Symptom onset	Log 2 (chemiluminescence value divided by cutoff, +1)	6.5	NA	POS	NA	NA	Visual	2
1	Long_Patient238018	19	19	NA	NA	Exact	Symptom onset	6.3	NA	NA	NA	Visual	2	Inf	Log 2 (chemiluminescence value divided by cutoff, +1)	NA	NA	Fig 2 D	IgG	Serum_Plasma	NA	NA	NA	Diseased	MCLIA	NP and Spike	SARS-CoV-2	Human	Chongqing	Long	2020	﻿10.1101/2020.03.18.20038018	NA	BB	1	Long_2020_38018	Patient2	19	19	Exact	Symptom onset	Log 2 (chemiluminescence value divided by cutoff, +1)	6.3	NA	POS	NA	NA	Visual	2
1	Long_Patient238018	22	22	NA	NA	Exact	Symptom onset	6.4	NA	NA	NA	Visual	2	Inf	Log 2 (chemiluminescence value divided by cutoff, +1)	NA	NA	Fig 2 D	IgG	Serum_Plasma	NA	NA	NA	Diseased	MCLIA	NP and Spike	SARS-CoV-2	Human	Chongqing	Long	2020	﻿10.1101/2020.03.18.20038018	NA	BB	1	Long_2020_38018	Patient2	22	22	Exact	Symptom onset	Log 2 (chemiluminescence value divided by cutoff, +1)	6.4	NA	POS	NA	NA	Visual	2
1	Long_Patient238018	25	25	NA	NA	Exact	Symptom onset	6.1	NA	NA	NA	Visual	2	Inf	Log 2 (chemiluminescence value divided by cutoff, +1)	NA	NA	Fig 2 D	IgG	Serum_Plasma	NA	NA	NA	Diseased	MCLIA	NP and Spike	SARS-CoV-2	Human	Chongqing	Long	2020	﻿10.1101/2020.03.18.20038018	NA	BB	1	Long_2020_38018	Patient2	25	25	Exact	Symptom onset	Log 2 (chemiluminescence value divided by cutoff, +1)	6.1	NA	POS	NA	NA	Visual	2
1	Long_Patient238018	4	4	NA	NA	Exact	Symptom onset	0	NA	NA	NA	Visual	2	Inf	Log 2 (chemiluminescence value divided by cutoff, +1)	NA	NA	Fig 2 D	IgM	Serum_Plasma	NA	NA	NA	Diseased	MCLIA	NP and Spike	SARS-CoV-2	Human	Chongqing	Long	2020	﻿10.1101/2020.03.18.20038018	NA	BB	1	Long_2020_38018	Patient2	4	4	Exact	Symptom onset	Log 2 (chemiluminescence value divided by cutoff, +1)	0	NA	NEG	NA	NA	Visual	2
1	Long_Patient238018	7	7	NA	NA	Exact	Symptom onset	2.9	NA	NA	NA	Visual	2	Inf	Log 2 (chemiluminescence value divided by cutoff, +1)	NA	NA	Fig 2 D	IgM	Serum_Plasma	NA	NA	NA	Diseased	MCLIA	NP and Spike	SARS-CoV-2	Human	Chongqing	Long	2020	﻿10.1101/2020.03.18.20038018	NA	BB	1	Long_2020_38018	Patient2	7	7	Exact	Symptom onset	Log 2 (chemiluminescence value divided by cutoff, +1)	2.9	NA	POS	NA	NA	Visual	2
1	Long_Patient238018	10	10	NA	NA	Exact	Symptom onset	3.1	NA	NA	NA	Visual	2	Inf	Log 2 (chemiluminescence value divided by cutoff, +1)	NA	NA	Fig 2 D	IgM	Serum_Plasma	NA	NA	NA	Diseased	MCLIA	NP and Spike	SARS-CoV-2	Human	Chongqing	Long	2020	﻿10.1101/2020.03.18.20038018	NA	BB	1	Long_2020_38018	Patient2	10	10	Exact	Symptom onset	Log 2 (chemiluminescence value divided by cutoff, +1)	3.1	NA	POS	NA	NA	Visual	2
1	Long_Patient238018	13	13	NA	NA	Exact	Symptom onset	3	NA	NA	NA	Visual	2	Inf	Log 2 (chemiluminescence value divided by cutoff, +1)	NA	NA	Fig 2 D	IgM	Serum_Plasma	NA	NA	NA	Diseased	MCLIA	NP and Spike	SARS-CoV-2	Human	Chongqing	Long	2020	﻿10.1101/2020.03.18.20038018	NA	BB	1	Long_2020_38018	Patient2	13	13	Exact	Symptom onset	Log 2 (chemiluminescence value divided by cutoff, +1)	3	NA	POS	NA	NA	Visual	2
1	Long_Patient238018	16	16	NA	NA	Exact	Symptom onset	3	NA	NA	NA	Visual	2	Inf	Log 2 (chemiluminescence value divided by cutoff, +1)	NA	NA	Fig 2 D	IgM	Serum_Plasma	NA	NA	NA	Diseased	MCLIA	NP and Spike	SARS-CoV-2	Human	Chongqing	Long	2020	﻿10.1101/2020.03.18.20038018	NA	BB	1	Long_2020_38018	Patient2	16	16	Exact	Symptom onset	Log 2 (chemiluminescence value divided by cutoff, +1)	3	NA	POS	NA	NA	Visual	2
1	Long_Patient238018	19	19	NA	NA	Exact	Symptom onset	3	NA	NA	NA	Visual	2	Inf	Log 2 (chemiluminescence value divided by cutoff, +1)	NA	NA	Fig 2 D	IgM	Serum_Plasma	NA	NA	NA	Diseased	MCLIA	NP and Spike	SARS-CoV-2	Human	Chongqing	Long	2020	﻿10.1101/2020.03.18.20038018	NA	BB	1	Long_2020_38018	Patient2	19	19	Exact	Symptom onset	Log 2 (chemiluminescence value divided by cutoff, +1)	3	NA	POS	NA	NA	Visual	2
1	Long_Patient238018	22	22	NA	NA	Exact	Symptom onset	3.4	NA	NA	NA	Visual	2	Inf	Log 2 (chemiluminescence value divided by cutoff, +1)	NA	NA	Fig 2 D	IgM	Serum_Plasma	NA	NA	NA	Diseased	MCLIA	NP and Spike	SARS-CoV-2	Human	Chongqing	Long	2020	﻿10.1101/2020.03.18.20038018	NA	BB	1	Long_2020_38018	Patient2	22	22	Exact	Symptom onset	Log 2 (chemiluminescence value divided by cutoff, +1)	3.4	NA	POS	NA	NA	Visual	2
1	Long_Patient238018	25	25	NA	NA	Exact	Symptom onset	3.2	NA	NA	NA	Visual	2	Inf	Log 2 (chemiluminescence value divided by cutoff, +1)	NA	NA	Fig 2 D	IgM	Serum_Plasma	NA	NA	NA	Diseased	MCLIA	NP and Spike	SARS-CoV-2	Human	Chongqing	Long	2020	﻿10.1101/2020.03.18.20038018	NA	BB	1	Long_2020_38018	Patient2	25	25	Exact	Symptom onset	Log 2 (chemiluminescence value divided by cutoff, +1)	3.2	NA	POS	NA	NA	Visual	2
1	Long_Patient1238018	9	9	NA	NA	Exact	Symptom onset	0	NA	NA	NA	Visual	2	Inf	Log 2 (chemiluminescence value divided by cutoff, +1)	NA	NA	Fig S2	IgG	Serum_Plasma	NA	NA	NA	Diseased	MCLIA	NP and Spike	SARS-CoV-2	Human	Chongqing	Long	2020	﻿10.1101/2020.03.18.20038018	NA	BB	1	Long_2020_38018	Patient12	9	9	Exact	Symptom onset	Log 2 (chemiluminescence value divided by cutoff, +1)	0	NA	NEG	NA	NA	Visual	2
1	Long_Patient1238018	12	12	NA	NA	Exact	Symptom onset	3	NA	NA	NA	Visual	2	Inf	Log 2 (chemiluminescence value divided by cutoff, +1)	NA	NA	Fig S2	IgG	Serum_Plasma	NA	NA	NA	Diseased	MCLIA	NP and Spike	SARS-CoV-2	Human	Chongqing	Long	2020	﻿10.1101/2020.03.18.20038018	NA	BB	1	Long_2020_38018	Patient12	12	12	Exact	Symptom onset	Log 2 (chemiluminescence value divided by cutoff, +1)	3	NA	POS	NA	NA	Visual	2
1	Long_Patient1238018	15	15	NA	NA	Exact	Symptom onset	4.2	NA	NA	NA	Visual	2	Inf	Log 2 (chemiluminescence value divided by cutoff, +1)	NA	NA	Fig S2	IgG	Serum_Plasma	NA	NA	NA	Diseased	MCLIA	NP and Spike	SARS-CoV-2	Human	Chongqing	Long	2020	﻿10.1101/2020.03.18.20038018	NA	BB	1	Long_2020_38018	Patient12	15	15	Exact	Symptom onset	Log 2 (chemiluminescence value divided by cutoff, +1)	4.2	NA	POS	NA	NA	Visual	2
1	Long_Patient1238018	18	18	NA	NA	Exact	Symptom onset	4.9	NA	NA	NA	Visual	2	Inf	Log 2 (chemiluminescence value divided by cutoff, +1)	NA	NA	Fig S2	IgG	Serum_Plasma	NA	NA	NA	Diseased	MCLIA	NP and Spike	SARS-CoV-2	Human	Chongqing	Long	2020	﻿10.1101/2020.03.18.20038018	NA	BB	1	Long_2020_38018	Patient12	18	18	Exact	Symptom onset	Log 2 (chemiluminescence value divided by cutoff, +1)	4.9	NA	POS	NA	NA	Visual	2
1	Long_Patient1238018	21	21	NA	NA	Exact	Symptom onset	5.2	NA	NA	NA	Visual	2	Inf	Log 2 (chemiluminescence value divided by cutoff, +1)	NA	NA	Fig S2	IgG	Serum_Plasma	NA	NA	NA	Diseased	MCLIA	NP and Spike	SARS-CoV-2	Human	Chongqing	Long	2020	﻿10.1101/2020.03.18.20038018	NA	BB	1	Long_2020_38018	Patient12	21	21	Exact	Symptom onset	Log 2 (chemiluminescence value divided by cutoff, +1)	5.2	NA	POS	NA	NA	Visual	2
1	Long_Patient1238018	9	9	NA	NA	Exact	Symptom onset	0	NA	NA	NA	Visual	2	Inf	Log 2 (chemiluminescence value divided by cutoff, +1)	NA	NA	Fig S2	IgM	Serum_Plasma	NA	NA	NA	Diseased	MCLIA	NP and Spike	SARS-CoV-2	Human	Chongqing	Long	2020	﻿10.1101/2020.03.18.20038018	NA	BB	1	Long_2020_38018	Patient12	9	9	Exact	Symptom onset	Log 2 (chemiluminescence value divided by cutoff, +1)	0	NA	NEG	NA	NA	Visual	2
1	Long_Patient1238018	12	12	NA	NA	Exact	Symptom onset	2.4	NA	NA	NA	Visual	2	Inf	Log 2 (chemiluminescence value divided by cutoff, +1)	NA	NA	Fig S2	IgM	Serum_Plasma	NA	NA	NA	Diseased	MCLIA	NP and Spike	SARS-CoV-2	Human	Chongqing	Long	2020	﻿10.1101/2020.03.18.20038018	NA	BB	1	Long_2020_38018	Patient12	12	12	Exact	Symptom onset	Log 2 (chemiluminescence value divided by cutoff, +1)	2.4	NA	POS	NA	NA	Visual	2
1	Long_Patient1238018	15	15	NA	NA	Exact	Symptom onset	3.2	NA	NA	NA	Visual	2	Inf	Log 2 (chemiluminescence value divided by cutoff, +1)	NA	NA	Fig S2	IgM	Serum_Plasma	NA	NA	NA	Diseased	MCLIA	NP and Spike	SARS-CoV-2	Human	Chongqing	Long	2020	﻿10.1101/2020.03.18.20038018	NA	BB	1	Long_2020_38018	Patient12	15	15	Exact	Symptom onset	Log 2 (chemiluminescence value divided by cutoff, +1)	3.2	NA	POS	NA	NA	Visual	2
1	Long_Patient1238018	18	18	NA	NA	Exact	Symptom onset	3.1	NA	NA	NA	Visual	2	Inf	Log 2 (chemiluminescence value divided by cutoff, +1)	NA	NA	Fig S2	IgM	Serum_Plasma	NA	NA	NA	Diseased	MCLIA	NP and Spike	SARS-CoV-2	Human	Chongqing	Long	2020	﻿10.1101/2020.03.18.20038018	NA	BB	1	Long_2020_38018	Patient12	18	18	Exact	Symptom onset	Log 2 (chemiluminescence value divided by cutoff, +1)	3.1	NA	POS	NA	NA	Visual	2
1	Long_Patient1238018	21	21	NA	NA	Exact	Symptom onset	3.4	NA	NA	NA	Visual	2	Inf	Log 2 (chemiluminescence value divided by cutoff, +1)	NA	NA	Fig S2	IgM	Serum_Plasma	NA	NA	NA	Diseased	MCLIA	NP and Spike	SARS-CoV-2	Human	Chongqing	Long	2020	﻿10.1101/2020.03.18.20038018	NA	BB	1	Long_2020_38018	Patient12	21	21	Exact	Symptom onset	Log 2 (chemiluminescence value divided by cutoff, +1)	3.4	NA	POS	NA	NA	Visual	2
1	Long_Patient2438018	5	5	NA	NA	Exact	Symptom onset	0	NA	NA	NA	Visual	2	Inf	Log 2 (chemiluminescence value divided by cutoff, +1)	NA	NA	Fig S2	IgG	Serum_Plasma	NA	NA	NA	Diseased	MCLIA	NP and Spike	SARS-CoV-2	Human	Chongqing	Long	2020	﻿10.1101/2020.03.18.20038018	NA	BB	1	Long_2020_38018	Patient24	5	5	Exact	Symptom onset	Log 2 (chemiluminescence value divided by cutoff, +1)	0	NA	NEG	NA	NA	Visual	2
1	Long_Patient2438018	11	11	NA	NA	Exact	Symptom onset	0	NA	NA	NA	Visual	2	Inf	Log 2 (chemiluminescence value divided by cutoff, +1)	NA	NA	Fig S2	IgG	Serum_Plasma	NA	NA	NA	Diseased	MCLIA	NP and Spike	SARS-CoV-2	Human	Chongqing	Long	2020	﻿10.1101/2020.03.18.20038018	NA	BB	1	Long_2020_38018	Patient24	11	11	Exact	Symptom onset	Log 2 (chemiluminescence value divided by cutoff, +1)	0	NA	NEG	NA	NA	Visual	2
1	Long_Patient2438018	20	20	NA	NA	Exact	Symptom onset	3.7	NA	NA	NA	Visual	2	Inf	Log 2 (chemiluminescence value divided by cutoff, +1)	NA	NA	Fig S2	IgG	Serum_Plasma	NA	NA	NA	Diseased	MCLIA	NP and Spike	SARS-CoV-2	Human	Chongqing	Long	2020	﻿10.1101/2020.03.18.20038018	NA	BB	1	Long_2020_38018	Patient24	20	20	Exact	Symptom onset	Log 2 (chemiluminescence value divided by cutoff, +1)	3.7	NA	POS	NA	NA	Visual	2
1	Long_Patient2438018	23	23	NA	NA	Exact	Symptom onset	3.9	NA	NA	NA	Visual	2	Inf	Log 2 (chemiluminescence value divided by cutoff, +1)	NA	NA	Fig S2	IgG	Serum_Plasma	NA	NA	NA	Diseased	MCLIA	NP and Spike	SARS-CoV-2	Human	Chongqing	Long	2020	﻿10.1101/2020.03.18.20038018	NA	BB	1	Long_2020_38018	Patient24	23	23	Exact	Symptom onset	Log 2 (chemiluminescence value divided by cutoff, +1)	3.9	NA	POS	NA	NA	Visual	2
1	Long_Patient2438018	26	26	NA	NA	Exact	Symptom onset	3.4	NA	NA	NA	Visual	2	Inf	Log 2 (chemiluminescence value divided by cutoff, +1)	NA	NA	Fig S2	IgG	Serum_Plasma	NA	NA	NA	Diseased	MCLIA	NP and Spike	SARS-CoV-2	Human	Chongqing	Long	2020	﻿10.1101/2020.03.18.20038018	NA	BB	1	Long_2020_38018	Patient24	26	26	Exact	Symptom onset	Log 2 (chemiluminescence value divided by cutoff, +1)	3.4	NA	POS	NA	NA	Visual	2
1	Long_Patient2438018	29	29	NA	NA	Exact	Symptom onset	3.2	NA	NA	NA	Visual	2	Inf	Log 2 (chemiluminescence value divided by cutoff, +1)	NA	NA	Fig S2	IgG	Serum_Plasma	NA	NA	NA	Diseased	MCLIA	NP and Spike	SARS-CoV-2	Human	Chongqing	Long	2020	﻿10.1101/2020.03.18.20038018	NA	BB	1	Long_2020_38018	Patient24	29	29	Exact	Symptom onset	Log 2 (chemiluminescence value divided by cutoff, +1)	3.2	NA	POS	NA	NA	Visual	2
1	Long_Patient2438018	5	5	NA	NA	Exact	Symptom onset	0	NA	NA	NA	Visual	2	Inf	Log 2 (chemiluminescence value divided by cutoff, +1)	NA	NA	Fig S2	IgM	Serum_Plasma	NA	NA	NA	Diseased	MCLIA	NP and Spike	SARS-CoV-2	Human	Chongqing	Long	2020	﻿10.1101/2020.03.18.20038018	NA	BB	1	Long_2020_38018	Patient24	5	5	Exact	Symptom onset	Log 2 (chemiluminescence value divided by cutoff, +1)	0	NA	NEG	NA	NA	Visual	2
1	Long_Patient2438018	11	11	NA	NA	Exact	Symptom onset	0	NA	NA	NA	Visual	2	Inf	Log 2 (chemiluminescence value divided by cutoff, +1)	NA	NA	Fig S2	IgM	Serum_Plasma	NA	NA	NA	Diseased	MCLIA	NP and Spike	SARS-CoV-2	Human	Chongqing	Long	2020	﻿10.1101/2020.03.18.20038018	NA	BB	1	Long_2020_38018	Patient24	11	11	Exact	Symptom onset	Log 2 (chemiluminescence value divided by cutoff, +1)	0	NA	NEG	NA	NA	Visual	2
1	Long_Patient2438018	20	20	NA	NA	Exact	Symptom onset	2.9	NA	NA	NA	Visual	2	Inf	Log 2 (chemiluminescence value divided by cutoff, +1)	NA	NA	Fig S2	IgM	Serum_Plasma	NA	NA	NA	Diseased	MCLIA	NP and Spike	SARS-CoV-2	Human	Chongqing	Long	2020	﻿10.1101/2020.03.18.20038018	NA	BB	1	Long_2020_38018	Patient24	20	20	Exact	Symptom onset	Log 2 (chemiluminescence value divided by cutoff, +1)	2.9	NA	POS	NA	NA	Visual	2
1	Long_Patient2438018	23	23	NA	NA	Exact	Symptom onset	3.3	NA	NA	NA	Visual	2	Inf	Log 2 (chemiluminescence value divided by cutoff, +1)	NA	NA	Fig S2	IgM	Serum_Plasma	NA	NA	NA	Diseased	MCLIA	NP and Spike	SARS-CoV-2	Human	Chongqing	Long	2020	﻿10.1101/2020.03.18.20038018	NA	BB	1	Long_2020_38018	Patient24	23	23	Exact	Symptom onset	Log 2 (chemiluminescence value divided by cutoff, +1)	3.3	NA	POS	NA	NA	Visual	2
1	Long_Patient2438018	26	26	NA	NA	Exact	Symptom onset	3.1	NA	NA	NA	Visual	2	Inf	Log 2 (chemiluminescence value divided by cutoff, +1)	NA	NA	Fig S2	IgM	Serum_Plasma	NA	NA	NA	Diseased	MCLIA	NP and Spike	SARS-CoV-2	Human	Chongqing	Long	2020	﻿10.1101/2020.03.18.20038018	NA	BB	1	Long_2020_38018	Patient24	26	26	Exact	Symptom onset	Log 2 (chemiluminescence value divided by cutoff, +1)	3.1	NA	POS	NA	NA	Visual	2
1	Long_Patient2438018	29	29	NA	NA	Exact	Symptom onset	3	NA	NA	NA	Visual	2	Inf	Log 2 (chemiluminescence value divided by cutoff, +1)	NA	NA	Fig S2	IgM	Serum_Plasma	NA	NA	NA	Diseased	MCLIA	NP and Spike	SARS-CoV-2	Human	Chongqing	Long	2020	﻿10.1101/2020.03.18.20038018	NA	BB	1	Long_2020_38018	Patient24	29	29	Exact	Symptom onset	Log 2 (chemiluminescence value divided by cutoff, +1)	3	NA	POS	NA	NA	Visual	2
1	Long_Patient938018	3	3	NA	NA	Exact	Symptom onset	0	NA	NA	NA	Visual	2	Inf	Log 2 (chemiluminescence value divided by cutoff, +1)	NA	NA	Fig S2	IgG	Serum_Plasma	NA	NA	NA	Diseased	MCLIA	NP and Spike	SARS-CoV-2	Human	Chongqing	Long	2020	﻿10.1101/2020.03.18.20038018	NA	BB	1	Long_2020_38018	Patient9	3	3	Exact	Symptom onset	Log 2 (chemiluminescence value divided by cutoff, +1)	0	NA	NEG	NA	NA	Visual	2
1	Long_Patient938018	9	9	NA	NA	Exact	Symptom onset	2.8	NA	NA	NA	Visual	2	Inf	Log 2 (chemiluminescence value divided by cutoff, +1)	NA	NA	Fig S2	IgG	Serum_Plasma	NA	NA	NA	Diseased	MCLIA	NP and Spike	SARS-CoV-2	Human	Chongqing	Long	2020	﻿10.1101/2020.03.18.20038018	NA	BB	1	Long_2020_38018	Patient9	9	9	Exact	Symptom onset	Log 2 (chemiluminescence value divided by cutoff, +1)	2.8	NA	POS	NA	NA	Visual	2
1	Long_Patient938018	3	3	NA	NA	Exact	Symptom onset	0	NA	NA	NA	Visual	2	Inf	Log 2 (chemiluminescence value divided by cutoff, +1)	NA	NA	Fig S2	IgM	Serum_Plasma	NA	NA	NA	Diseased	MCLIA	NP and Spike	SARS-CoV-2	Human	Chongqing	Long	2020	﻿10.1101/2020.03.18.20038018	NA	BB	1	Long_2020_38018	Patient9	3	3	Exact	Symptom onset	Log 2 (chemiluminescence value divided by cutoff, +1)	0	NA	NEG	NA	NA	Visual	2
1	Long_Patient938018	9	9	NA	NA	Exact	Symptom onset	1.8	NA	NA	NA	Visual	2	Inf	Log 2 (chemiluminescence value divided by cutoff, +1)	NA	NA	Fig S2	IgM	Serum_Plasma	NA	NA	NA	Diseased	MCLIA	NP and Spike	SARS-CoV-2	Human	Chongqing	Long	2020	﻿10.1101/2020.03.18.20038018	NA	BB	1	Long_2020_38018	Patient9	9	9	Exact	Symptom onset	Log 2 (chemiluminescence value divided by cutoff, +1)	1.8	NA	POS	NA	NA	Visual	2
1	Long_Patient1738018	8	8	NA	NA	Exact	Symptom onset	0	NA	NA	NA	Visual	2	Inf	Log 2 (chemiluminescence value divided by cutoff, +1)	NA	NA	Fig S2	IgG	Serum_Plasma	NA	NA	NA	Diseased	MCLIA	NP and Spike	SARS-CoV-2	Human	Chongqing	Long	2020	﻿10.1101/2020.03.18.20038018	NA	BB	1	Long_2020_38018	Patient17	8	8	Exact	Symptom onset	Log 2 (chemiluminescence value divided by cutoff, +1)	0	NA	NEG	NA	NA	Visual	2
1	Long_Patient1738018	14	14	NA	NA	Exact	Symptom onset	3.5	NA	NA	NA	Visual	2	Inf	Log 2 (chemiluminescence value divided by cutoff, +1)	NA	NA	Fig S2	IgG	Serum_Plasma	NA	NA	NA	Diseased	MCLIA	NP and Spike	SARS-CoV-2	Human	Chongqing	Long	2020	﻿10.1101/2020.03.18.20038018	NA	BB	1	Long_2020_38018	Patient17	14	14	Exact	Symptom onset	Log 2 (chemiluminescence value divided by cutoff, +1)	3.5	NA	POS	NA	NA	Visual	2
1	Long_Patient1738018	17	17	NA	NA	Exact	Symptom onset	4.9	NA	NA	NA	Visual	2	Inf	Log 2 (chemiluminescence value divided by cutoff, +1)	NA	NA	Fig S2	IgG	Serum_Plasma	NA	NA	NA	Diseased	MCLIA	NP and Spike	SARS-CoV-2	Human	Chongqing	Long	2020	﻿10.1101/2020.03.18.20038018	NA	BB	1	Long_2020_38018	Patient17	17	17	Exact	Symptom onset	Log 2 (chemiluminescence value divided by cutoff, +1)	4.9	NA	POS	NA	NA	Visual	2
1	Long_Patient1738018	20	20	NA	NA	Exact	Symptom onset	5	NA	NA	NA	Visual	2	Inf	Log 2 (chemiluminescence value divided by cutoff, +1)	NA	NA	Fig S2	IgG	Serum_Plasma	NA	NA	NA	Diseased	MCLIA	NP and Spike	SARS-CoV-2	Human	Chongqing	Long	2020	﻿10.1101/2020.03.18.20038018	NA	BB	1	Long_2020_38018	Patient17	20	20	Exact	Symptom onset	Log 2 (chemiluminescence value divided by cutoff, +1)	5	NA	POS	NA	NA	Visual	2
1	Long_Patient1738018	23	23	NA	NA	Exact	Symptom onset	4.8	NA	NA	NA	Visual	2	Inf	Log 2 (chemiluminescence value divided by cutoff, +1)	NA	NA	Fig S2	IgG	Serum_Plasma	NA	NA	NA	Diseased	MCLIA	NP and Spike	SARS-CoV-2	Human	Chongqing	Long	2020	﻿10.1101/2020.03.18.20038018	NA	BB	1	Long_2020_38018	Patient17	23	23	Exact	Symptom onset	Log 2 (chemiluminescence value divided by cutoff, +1)	4.8	NA	POS	NA	NA	Visual	2
1	Long_Patient1738018	26	26	NA	NA	Exact	Symptom onset	4.9	NA	NA	NA	Visual	2	Inf	Log 2 (chemiluminescence value divided by cutoff, +1)	NA	NA	Fig S2	IgG	Serum_Plasma	NA	NA	NA	Diseased	MCLIA	NP and Spike	SARS-CoV-2	Human	Chongqing	Long	2020	﻿10.1101/2020.03.18.20038018	NA	BB	1	Long_2020_38018	Patient17	26	26	Exact	Symptom onset	Log 2 (chemiluminescence value divided by cutoff, +1)	4.9	NA	POS	NA	NA	Visual	2
1	Long_Patient1738018	8	8	NA	NA	Exact	Symptom onset	0	NA	NA	NA	Visual	2	Inf	Log 2 (chemiluminescence value divided by cutoff, +1)	NA	NA	Fig S2	IgM	Serum_Plasma	NA	NA	NA	Diseased	MCLIA	NP and Spike	SARS-CoV-2	Human	Chongqing	Long	2020	﻿10.1101/2020.03.18.20038018	NA	BB	1	Long_2020_38018	Patient17	8	8	Exact	Symptom onset	Log 2 (chemiluminescence value divided by cutoff, +1)	0	NA	NEG	NA	NA	Visual	2
1	Long_Patient1738018	14	14	NA	NA	Exact	Symptom onset	6.8	NA	NA	NA	Visual	2	Inf	Log 2 (chemiluminescence value divided by cutoff, +1)	NA	NA	Fig S2	IgM	Serum_Plasma	NA	NA	NA	Diseased	MCLIA	NP and Spike	SARS-CoV-2	Human	Chongqing	Long	2020	﻿10.1101/2020.03.18.20038018	NA	BB	1	Long_2020_38018	Patient17	14	14	Exact	Symptom onset	Log 2 (chemiluminescence value divided by cutoff, +1)	6.8	NA	POS	NA	NA	Visual	2
1	Long_Patient1738018	17	17	NA	NA	Exact	Symptom onset	7	NA	NA	NA	Visual	2	Inf	Log 2 (chemiluminescence value divided by cutoff, +1)	NA	NA	Fig S2	IgM	Serum_Plasma	NA	NA	NA	Diseased	MCLIA	NP and Spike	SARS-CoV-2	Human	Chongqing	Long	2020	﻿10.1101/2020.03.18.20038018	NA	BB	1	Long_2020_38018	Patient17	17	17	Exact	Symptom onset	Log 2 (chemiluminescence value divided by cutoff, +1)	7	NA	POS	NA	NA	Visual	2
1	Long_Patient1738018	20	20	NA	NA	Exact	Symptom onset	6.7	NA	NA	NA	Visual	2	Inf	Log 2 (chemiluminescence value divided by cutoff, +1)	NA	NA	Fig S2	IgM	Serum_Plasma	NA	NA	NA	Diseased	MCLIA	NP and Spike	SARS-CoV-2	Human	Chongqing	Long	2020	﻿10.1101/2020.03.18.20038018	NA	BB	1	Long_2020_38018	Patient17	20	20	Exact	Symptom onset	Log 2 (chemiluminescence value divided by cutoff, +1)	6.7	NA	POS	NA	NA	Visual	2
1	Long_Patient1738018	23	23	NA	NA	Exact	Symptom onset	6.3	NA	NA	NA	Visual	2	Inf	Log 2 (chemiluminescence value divided by cutoff, +1)	NA	NA	Fig S2	IgM	Serum_Plasma	NA	NA	NA	Diseased	MCLIA	NP and Spike	SARS-CoV-2	Human	Chongqing	Long	2020	﻿10.1101/2020.03.18.20038018	NA	BB	1	Long_2020_38018	Patient17	23	23	Exact	Symptom onset	Log 2 (chemiluminescence value divided by cutoff, +1)	6.3	NA	POS	NA	NA	Visual	2
1	Long_Patient1738018	26	26	NA	NA	Exact	Symptom onset	6.7	NA	NA	NA	Visual	2	Inf	Log 2 (chemiluminescence value divided by cutoff, +1)	NA	NA	Fig S2	IgM	Serum_Plasma	NA	NA	NA	Diseased	MCLIA	NP and Spike	SARS-CoV-2	Human	Chongqing	Long	2020	﻿10.1101/2020.03.18.20038018	NA	BB	1	Long_2020_38018	Patient17	26	26	Exact	Symptom onset	Log 2 (chemiluminescence value divided by cutoff, +1)	6.7	NA	POS	NA	NA	Visual	2
1	Long_Patient438018	3	3	NA	NA	Exact	Symptom onset	0	NA	NA	NA	Visual	2	Inf	Log 2 (chemiluminescence value divided by cutoff, +1)	NA	NA	Fig S2	IgG	Serum_Plasma	NA	NA	NA	Diseased	MCLIA	NP and Spike	SARS-CoV-2	Human	Chongqing	Long	2020	﻿10.1101/2020.03.18.20038018	NA	BB	1	Long_2020_38018	Patient4	3	3	Exact	Symptom onset	Log 2 (chemiluminescence value divided by cutoff, +1)	0	NA	NEG	NA	NA	Visual	2
1	Long_Patient438018	6	6	NA	NA	Exact	Symptom onset	1.9	NA	NA	NA	Visual	2	Inf	Log 2 (chemiluminescence value divided by cutoff, +1)	NA	NA	Fig S2	IgG	Serum_Plasma	NA	NA	NA	Diseased	MCLIA	NP and Spike	SARS-CoV-2	Human	Chongqing	Long	2020	﻿10.1101/2020.03.18.20038018	NA	BB	1	Long_2020_38018	Patient4	6	6	Exact	Symptom onset	Log 2 (chemiluminescence value divided by cutoff, +1)	1.9	NA	POS	NA	NA	Visual	2
1	Long_Patient438018	9	9	NA	NA	Exact	Symptom onset	3.2	NA	NA	NA	Visual	2	Inf	Log 2 (chemiluminescence value divided by cutoff, +1)	NA	NA	Fig S2	IgG	Serum_Plasma	NA	NA	NA	Diseased	MCLIA	NP and Spike	SARS-CoV-2	Human	Chongqing	Long	2020	﻿10.1101/2020.03.18.20038018	NA	BB	1	Long_2020_38018	Patient4	9	9	Exact	Symptom onset	Log 2 (chemiluminescence value divided by cutoff, +1)	3.2	NA	POS	NA	NA	Visual	2
1	Long_Patient438018	12	12	NA	NA	Exact	Symptom onset	3.6	NA	NA	NA	Visual	2	Inf	Log 2 (chemiluminescence value divided by cutoff, +1)	NA	NA	Fig S2	IgG	Serum_Plasma	NA	NA	NA	Diseased	MCLIA	NP and Spike	SARS-CoV-2	Human	Chongqing	Long	2020	﻿10.1101/2020.03.18.20038018	NA	BB	1	Long_2020_38018	Patient4	12	12	Exact	Symptom onset	Log 2 (chemiluminescence value divided by cutoff, +1)	3.6	NA	POS	NA	NA	Visual	2
1	Long_Patient438018	15	15	NA	NA	Exact	Symptom onset	3.5	NA	NA	NA	Visual	2	Inf	Log 2 (chemiluminescence value divided by cutoff, +1)	NA	NA	Fig S2	IgG	Serum_Plasma	NA	NA	NA	Diseased	MCLIA	NP and Spike	SARS-CoV-2	Human	Chongqing	Long	2020	﻿10.1101/2020.03.18.20038018	NA	BB	1	Long_2020_38018	Patient4	15	15	Exact	Symptom onset	Log 2 (chemiluminescence value divided by cutoff, +1)	3.5	NA	POS	NA	NA	Visual	2
1	Long_Patient438018	18	18	NA	NA	Exact	Symptom onset	3.1	NA	NA	NA	Visual	2	Inf	Log 2 (chemiluminescence value divided by cutoff, +1)	NA	NA	Fig S2	IgG	Serum_Plasma	NA	NA	NA	Diseased	MCLIA	NP and Spike	SARS-CoV-2	Human	Chongqing	Long	2020	﻿10.1101/2020.03.18.20038018	NA	BB	1	Long_2020_38018	Patient4	18	18	Exact	Symptom onset	Log 2 (chemiluminescence value divided by cutoff, +1)	3.1	NA	POS	NA	NA	Visual	2
1	Long_Patient438018	21	21	NA	NA	Exact	Symptom onset	3.5	NA	NA	NA	Visual	2	Inf	Log 2 (chemiluminescence value divided by cutoff, +1)	NA	NA	Fig S2	IgG	Serum_Plasma	NA	NA	NA	Diseased	MCLIA	NP and Spike	SARS-CoV-2	Human	Chongqing	Long	2020	﻿10.1101/2020.03.18.20038018	NA	BB	1	Long_2020_38018	Patient4	21	21	Exact	Symptom onset	Log 2 (chemiluminescence value divided by cutoff, +1)	3.5	NA	POS	NA	NA	Visual	2
1	Long_Patient438018	24	24	NA	NA	Exact	Symptom onset	3	NA	NA	NA	Visual	2	Inf	Log 2 (chemiluminescence value divided by cutoff, +1)	NA	NA	Fig S2	IgG	Serum_Plasma	NA	NA	NA	Diseased	MCLIA	NP and Spike	SARS-CoV-2	Human	Chongqing	Long	2020	﻿10.1101/2020.03.18.20038018	NA	BB	1	Long_2020_38018	Patient4	24	24	Exact	Symptom onset	Log 2 (chemiluminescence value divided by cutoff, +1)	3	NA	POS	NA	NA	Visual	2
1	Long_Patient438018	27	27	NA	NA	Exact	Symptom onset	3	NA	NA	NA	Visual	2	Inf	Log 2 (chemiluminescence value divided by cutoff, +1)	NA	NA	Fig S2	IgG	Serum_Plasma	NA	NA	NA	Diseased	MCLIA	NP and Spike	SARS-CoV-2	Human	Chongqing	Long	2020	﻿10.1101/2020.03.18.20038018	NA	BB	1	Long_2020_38018	Patient4	27	27	Exact	Symptom onset	Log 2 (chemiluminescence value divided by cutoff, +1)	3	NA	POS	NA	NA	Visual	2
1	Long_Patient438018	3	3	NA	NA	Exact	Symptom onset	0	NA	NA	NA	Visual	2	Inf	Log 2 (chemiluminescence value divided by cutoff, +1)	NA	NA	Fig S2	IgM	Serum_Plasma	NA	NA	NA	Diseased	MCLIA	NP and Spike	SARS-CoV-2	Human	Chongqing	Long	2020	﻿10.1101/2020.03.18.20038018	NA	BB	1	Long_2020_38018	Patient4	3	3	Exact	Symptom onset	Log 2 (chemiluminescence value divided by cutoff, +1)	0	NA	NEG	NA	NA	Visual	2
1	Long_Patient438018	6	6	NA	NA	Exact	Symptom onset	1.1	NA	NA	NA	Visual	2	Inf	Log 2 (chemiluminescence value divided by cutoff, +1)	NA	NA	Fig S2	IgM	Serum_Plasma	NA	NA	NA	Diseased	MCLIA	NP and Spike	SARS-CoV-2	Human	Chongqing	Long	2020	﻿10.1101/2020.03.18.20038018	NA	BB	1	Long_2020_38018	Patient4	6	6	Exact	Symptom onset	Log 2 (chemiluminescence value divided by cutoff, +1)	1.1	NA	POS	NA	NA	Visual	2
1	Long_Patient438018	9	9	NA	NA	Exact	Symptom onset	1.8	NA	NA	NA	Visual	2	Inf	Log 2 (chemiluminescence value divided by cutoff, +1)	NA	NA	Fig S2	IgM	Serum_Plasma	NA	NA	NA	Diseased	MCLIA	NP and Spike	SARS-CoV-2	Human	Chongqing	Long	2020	﻿10.1101/2020.03.18.20038018	NA	BB	1	Long_2020_38018	Patient4	9	9	Exact	Symptom onset	Log 2 (chemiluminescence value divided by cutoff, +1)	1.8	NA	POS	NA	NA	Visual	2
1	Long_Patient438018	12	12	NA	NA	Exact	Symptom onset	1.6	NA	NA	NA	Visual	2	Inf	Log 2 (chemiluminescence value divided by cutoff, +1)	NA	NA	Fig S2	IgM	Serum_Plasma	NA	NA	NA	Diseased	MCLIA	NP and Spike	SARS-CoV-2	Human	Chongqing	Long	2020	﻿10.1101/2020.03.18.20038018	NA	BB	1	Long_2020_38018	Patient4	12	12	Exact	Symptom onset	Log 2 (chemiluminescence value divided by cutoff, +1)	1.6	NA	POS	NA	NA	Visual	2
1	Long_Patient438018	15	15	NA	NA	Exact	Symptom onset	1.5	NA	NA	NA	Visual	2	Inf	Log 2 (chemiluminescence value divided by cutoff, +1)	NA	NA	Fig S2	IgM	Serum_Plasma	NA	NA	NA	Diseased	MCLIA	NP and Spike	SARS-CoV-2	Human	Chongqing	Long	2020	﻿10.1101/2020.03.18.20038018	NA	BB	1	Long_2020_38018	Patient4	15	15	Exact	Symptom onset	Log 2 (chemiluminescence value divided by cutoff, +1)	1.5	NA	POS	NA	NA	Visual	2
1	Long_Patient438018	18	18	NA	NA	Exact	Symptom onset	1.3	NA	NA	NA	Visual	2	Inf	Log 2 (chemiluminescence value divided by cutoff, +1)	NA	NA	Fig S2	IgM	Serum_Plasma	NA	NA	NA	Diseased	MCLIA	NP and Spike	SARS-CoV-2	Human	Chongqing	Long	2020	﻿10.1101/2020.03.18.20038018	NA	BB	1	Long_2020_38018	Patient4	18	18	Exact	Symptom onset	Log 2 (chemiluminescence value divided by cutoff, +1)	1.3	NA	POS	NA	NA	Visual	2
1	Long_Patient438018	21	21	NA	NA	Exact	Symptom onset	1.6	NA	NA	NA	Visual	2	Inf	Log 2 (chemiluminescence value divided by cutoff, +1)	NA	NA	Fig S2	IgM	Serum_Plasma	NA	NA	NA	Diseased	MCLIA	NP and Spike	SARS-CoV-2	Human	Chongqing	Long	2020	﻿10.1101/2020.03.18.20038018	NA	BB	1	Long_2020_38018	Patient4	21	21	Exact	Symptom onset	Log 2 (chemiluminescence value divided by cutoff, +1)	1.6	NA	POS	NA	NA	Visual	2
1	Long_Patient438018	24	24	NA	NA	Exact	Symptom onset	1.3	NA	NA	NA	Visual	2	Inf	Log 2 (chemiluminescence value divided by cutoff, +1)	NA	NA	Fig S2	IgM	Serum_Plasma	NA	NA	NA	Diseased	MCLIA	NP and Spike	SARS-CoV-2	Human	Chongqing	Long	2020	﻿10.1101/2020.03.18.20038018	NA	BB	1	Long_2020_38018	Patient4	24	24	Exact	Symptom onset	Log 2 (chemiluminescence value divided by cutoff, +1)	1.3	NA	POS	NA	NA	Visual	2
1	Long_Patient438018	27	27	NA	NA	Exact	Symptom onset	1.3	NA	NA	NA	Visual	2	Inf	Log 2 (chemiluminescence value divided by cutoff, +1)	NA	NA	Fig S2	IgM	Serum_Plasma	NA	NA	NA	Diseased	MCLIA	NP and Spike	SARS-CoV-2	Human	Chongqing	Long	2020	﻿10.1101/2020.03.18.20038018	NA	BB	1	Long_2020_38018	Patient4	27	27	Exact	Symptom onset	Log 2 (chemiluminescence value divided by cutoff, +1)	1.3	NA	POS	NA	NA	Visual	2
1	Long_Patient2038018	20	20	NA	NA	Exact	Symptom onset	0	NA	NA	NA	Visual	2	Inf	Log 2 (chemiluminescence value divided by cutoff, +1)	NA	NA	Fig S2	IgG	Serum_Plasma	NA	NA	NA	Diseased	MCLIA	NP and Spike	SARS-CoV-2	Human	Chongqing	Long	2020	﻿10.1101/2020.03.18.20038018	NA	BB	1	Long_2020_38018	Patient20	20	20	Exact	Symptom onset	Log 2 (chemiluminescence value divided by cutoff, +1)	0	NA	NEG	NA	NA	Visual	2
1	Long_Patient2038018	23	23	NA	NA	Exact	Symptom onset	4.1	NA	NA	NA	Visual	2	Inf	Log 2 (chemiluminescence value divided by cutoff, +1)	NA	NA	Fig S2	IgG	Serum_Plasma	NA	NA	NA	Diseased	MCLIA	NP and Spike	SARS-CoV-2	Human	Chongqing	Long	2020	﻿10.1101/2020.03.18.20038018	NA	BB	1	Long_2020_38018	Patient20	23	23	Exact	Symptom onset	Log 2 (chemiluminescence value divided by cutoff, +1)	4.1	NA	POS	NA	NA	Visual	2
1	Long_Patient2038018	26	26	NA	NA	Exact	Symptom onset	4.2	NA	NA	NA	Visual	2	Inf	Log 2 (chemiluminescence value divided by cutoff, +1)	NA	NA	Fig S2	IgG	Serum_Plasma	NA	NA	NA	Diseased	MCLIA	NP and Spike	SARS-CoV-2	Human	Chongqing	Long	2020	﻿10.1101/2020.03.18.20038018	NA	BB	1	Long_2020_38018	Patient20	26	26	Exact	Symptom onset	Log 2 (chemiluminescence value divided by cutoff, +1)	4.2	NA	POS	NA	NA	Visual	2
1	Long_Patient2038018	29	29	NA	NA	Exact	Symptom onset	4.7	NA	NA	NA	Visual	2	Inf	Log 2 (chemiluminescence value divided by cutoff, +1)	NA	NA	Fig S2	IgG	Serum_Plasma	NA	NA	NA	Diseased	MCLIA	NP and Spike	SARS-CoV-2	Human	Chongqing	Long	2020	﻿10.1101/2020.03.18.20038018	NA	BB	1	Long_2020_38018	Patient20	29	29	Exact	Symptom onset	Log 2 (chemiluminescence value divided by cutoff, +1)	4.7	NA	POS	NA	NA	Visual	2
1	Long_Patient2038018	20	20	NA	NA	Exact	Symptom onset	0	NA	NA	NA	Visual	2	Inf	Log 2 (chemiluminescence value divided by cutoff, +1)	NA	NA	Fig S2	IgM	Serum_Plasma	NA	NA	NA	Diseased	MCLIA	NP and Spike	SARS-CoV-2	Human	Chongqing	Long	2020	﻿10.1101/2020.03.18.20038018	NA	BB	1	Long_2020_38018	Patient20	20	20	Exact	Symptom onset	Log 2 (chemiluminescence value divided by cutoff, +1)	0	NA	NEG	NA	NA	Visual	2
1	Long_Patient2038018	23	23	NA	NA	Exact	Symptom onset	5	NA	NA	NA	Visual	2	Inf	Log 2 (chemiluminescence value divided by cutoff, +1)	NA	NA	Fig S2	IgM	Serum_Plasma	NA	NA	NA	Diseased	MCLIA	NP and Spike	SARS-CoV-2	Human	Chongqing	Long	2020	﻿10.1101/2020.03.18.20038018	NA	BB	1	Long_2020_38018	Patient20	23	23	Exact	Symptom onset	Log 2 (chemiluminescence value divided by cutoff, +1)	5	NA	POS	NA	NA	Visual	2
1	Long_Patient2038018	26	26	NA	NA	Exact	Symptom onset	5	NA	NA	NA	Visual	2	Inf	Log 2 (chemiluminescence value divided by cutoff, +1)	NA	NA	Fig S2	IgM	Serum_Plasma	NA	NA	NA	Diseased	MCLIA	NP and Spike	SARS-CoV-2	Human	Chongqing	Long	2020	﻿10.1101/2020.03.18.20038018	NA	BB	1	Long_2020_38018	Patient20	26	26	Exact	Symptom onset	Log 2 (chemiluminescence value divided by cutoff, +1)	5	NA	POS	NA	NA	Visual	2
1	Long_Patient2038018	29	29	NA	NA	Exact	Symptom onset	5.1	NA	NA	NA	Visual	2	Inf	Log 2 (chemiluminescence value divided by cutoff, +1)	NA	NA	Fig S2	IgM	Serum_Plasma	NA	NA	NA	Diseased	MCLIA	NP and Spike	SARS-CoV-2	Human	Chongqing	Long	2020	﻿10.1101/2020.03.18.20038018	NA	BB	1	Long_2020_38018	Patient20	29	29	Exact	Symptom onset	Log 2 (chemiluminescence value divided by cutoff, +1)	5.1	NA	POS	NA	NA	Visual	2
1	Long_Patient538018	4	4	NA	NA	Exact	Symptom onset	0	NA	NA	NA	Visual	2	Inf	Log 2 (chemiluminescence value divided by cutoff, +1)	NA	NA	Fig S2	IgG	Serum_Plasma	NA	NA	NA	Diseased	MCLIA	NP and Spike	SARS-CoV-2	Human	Chongqing	Long	2020	﻿10.1101/2020.03.18.20038018	NA	BB	1	Long_2020_38018	Patient5	4	4	Exact	Symptom onset	Log 2 (chemiluminescence value divided by cutoff, +1)	0	NA	NEG	NA	NA	Visual	2
1	Long_Patient538018	7	7	NA	NA	Exact	Symptom onset	1.2	NA	NA	NA	Visual	2	Inf	Log 2 (chemiluminescence value divided by cutoff, +1)	NA	NA	Fig S2	IgG	Serum_Plasma	NA	NA	NA	Diseased	MCLIA	NP and Spike	SARS-CoV-2	Human	Chongqing	Long	2020	﻿10.1101/2020.03.18.20038018	NA	BB	1	Long_2020_38018	Patient5	7	7	Exact	Symptom onset	Log 2 (chemiluminescence value divided by cutoff, +1)	1.2	NA	POS	NA	NA	Visual	2
1	Long_Patient538018	4	4	NA	NA	Exact	Symptom onset	0	NA	NA	NA	Visual	2	Inf	Log 2 (chemiluminescence value divided by cutoff, +1)	NA	NA	Fig S2	IgM	Serum_Plasma	NA	NA	NA	Diseased	MCLIA	NP and Spike	SARS-CoV-2	Human	Chongqing	Long	2020	﻿10.1101/2020.03.18.20038018	NA	BB	1	Long_2020_38018	Patient5	4	4	Exact	Symptom onset	Log 2 (chemiluminescence value divided by cutoff, +1)	0	NA	NEG	NA	NA	Visual	2
1	Long_Patient538018	7	7	NA	NA	Exact	Symptom onset	1.5	NA	NA	NA	Visual	2	Inf	Log 2 (chemiluminescence value divided by cutoff, +1)	NA	NA	Fig S2	IgM	Serum_Plasma	NA	NA	NA	Diseased	MCLIA	NP and Spike	SARS-CoV-2	Human	Chongqing	Long	2020	﻿10.1101/2020.03.18.20038018	NA	BB	1	Long_2020_38018	Patient5	7	7	Exact	Symptom onset	Log 2 (chemiluminescence value divided by cutoff, +1)	1.5	NA	POS	NA	NA	Visual	2
1	Long_Patient2138018	15	15	NA	NA	Exact	Symptom onset	0	NA	NA	NA	Visual	2	Inf	Log 2 (chemiluminescence value divided by cutoff, +1)	NA	NA	Fig S2	IgG	Serum_Plasma	NA	NA	NA	Diseased	MCLIA	NP and Spike	SARS-CoV-2	Human	Chongqing	Long	2020	﻿10.1101/2020.03.18.20038018	NA	BB	1	Long_2020_38018	Patient21	15	15	Exact	Symptom onset	Log 2 (chemiluminescence value divided by cutoff, +1)	0	NA	NEG	NA	NA	Visual	2
1	Long_Patient2138018	18	18	NA	NA	Exact	Symptom onset	1.6	NA	NA	NA	Visual	2	Inf	Log 2 (chemiluminescence value divided by cutoff, +1)	NA	NA	Fig S2	IgG	Serum_Plasma	NA	NA	NA	Diseased	MCLIA	NP and Spike	SARS-CoV-2	Human	Chongqing	Long	2020	﻿10.1101/2020.03.18.20038018	NA	BB	1	Long_2020_38018	Patient21	18	18	Exact	Symptom onset	Log 2 (chemiluminescence value divided by cutoff, +1)	1.6	NA	POS	NA	NA	Visual	2
1	Long_Patient2138018	21	21	NA	NA	Exact	Symptom onset	2	NA	NA	NA	Visual	2	Inf	Log 2 (chemiluminescence value divided by cutoff, +1)	NA	NA	Fig S2	IgG	Serum_Plasma	NA	NA	NA	Diseased	MCLIA	NP and Spike	SARS-CoV-2	Human	Chongqing	Long	2020	﻿10.1101/2020.03.18.20038018	NA	BB	1	Long_2020_38018	Patient21	21	21	Exact	Symptom onset	Log 2 (chemiluminescence value divided by cutoff, +1)	2	NA	POS	NA	NA	Visual	2
1	Long_Patient2138018	24	24	NA	NA	Exact	Symptom onset	2.1	NA	NA	NA	Visual	2	Inf	Log 2 (chemiluminescence value divided by cutoff, +1)	NA	NA	Fig S2	IgG	Serum_Plasma	NA	NA	NA	Diseased	MCLIA	NP and Spike	SARS-CoV-2	Human	Chongqing	Long	2020	﻿10.1101/2020.03.18.20038018	NA	BB	1	Long_2020_38018	Patient21	24	24	Exact	Symptom onset	Log 2 (chemiluminescence value divided by cutoff, +1)	2.1	NA	POS	NA	NA	Visual	2
1	Long_Patient2138018	27	27	NA	NA	Exact	Symptom onset	2.5	NA	NA	NA	Visual	2	Inf	Log 2 (chemiluminescence value divided by cutoff, +1)	NA	NA	Fig S2	IgG	Serum_Plasma	NA	NA	NA	Diseased	MCLIA	NP and Spike	SARS-CoV-2	Human	Chongqing	Long	2020	﻿10.1101/2020.03.18.20038018	NA	BB	1	Long_2020_38018	Patient21	27	27	Exact	Symptom onset	Log 2 (chemiluminescence value divided by cutoff, +1)	2.5	NA	POS	NA	NA	Visual	2
1	Long_Patient2138018	30	30	NA	NA	Exact	Symptom onset	2.5	NA	NA	NA	Visual	2	Inf	Log 2 (chemiluminescence value divided by cutoff, +1)	NA	NA	Fig S2	IgG	Serum_Plasma	NA	NA	NA	Diseased	MCLIA	NP and Spike	SARS-CoV-2	Human	Chongqing	Long	2020	﻿10.1101/2020.03.18.20038018	NA	BB	1	Long_2020_38018	Patient21	30	30	Exact	Symptom onset	Log 2 (chemiluminescence value divided by cutoff, +1)	2.5	NA	POS	NA	NA	Visual	2
1	Long_Patient2138018	33	33	NA	NA	Exact	Symptom onset	2.4	NA	NA	NA	Visual	2	Inf	Log 2 (chemiluminescence value divided by cutoff, +1)	NA	NA	Fig S2	IgG	Serum_Plasma	NA	NA	NA	Diseased	MCLIA	NP and Spike	SARS-CoV-2	Human	Chongqing	Long	2020	﻿10.1101/2020.03.18.20038018	NA	BB	1	Long_2020_38018	Patient21	33	33	Exact	Symptom onset	Log 2 (chemiluminescence value divided by cutoff, +1)	2.4	NA	POS	NA	NA	Visual	2
1	Long_Patient2138018	15	15	NA	NA	Exact	Symptom onset	1.4	NA	NA	NA	Visual	2	Inf	Log 2 (chemiluminescence value divided by cutoff, +1)	NA	NA	Fig S2	IgM	Serum_Plasma	NA	NA	NA	Diseased	MCLIA	NP and Spike	SARS-CoV-2	Human	Chongqing	Long	2020	﻿10.1101/2020.03.18.20038018	NA	BB	1	Long_2020_38018	Patient21	15	15	Exact	Symptom onset	Log 2 (chemiluminescence value divided by cutoff, +1)	1.4	NA	POS	NA	NA	Visual	2
1	Long_Patient2138018	18	18	NA	NA	Exact	Symptom onset	1.5	NA	NA	NA	Visual	2	Inf	Log 2 (chemiluminescence value divided by cutoff, +1)	NA	NA	Fig S2	IgM	Serum_Plasma	NA	NA	NA	Diseased	MCLIA	NP and Spike	SARS-CoV-2	Human	Chongqing	Long	2020	﻿10.1101/2020.03.18.20038018	NA	BB	1	Long_2020_38018	Patient21	18	18	Exact	Symptom onset	Log 2 (chemiluminescence value divided by cutoff, +1)	1.5	NA	POS	NA	NA	Visual	2
1	Long_Patient2138018	21	21	NA	NA	Exact	Symptom onset	1.6	NA	NA	NA	Visual	2	Inf	Log 2 (chemiluminescence value divided by cutoff, +1)	NA	NA	Fig S2	IgM	Serum_Plasma	NA	NA	NA	Diseased	MCLIA	NP and Spike	SARS-CoV-2	Human	Chongqing	Long	2020	﻿10.1101/2020.03.18.20038018	NA	BB	1	Long_2020_38018	Patient21	21	21	Exact	Symptom onset	Log 2 (chemiluminescence value divided by cutoff, +1)	1.6	NA	POS	NA	NA	Visual	2
1	Long_Patient2138018	24	24	NA	NA	Exact	Symptom onset	1.7	NA	NA	NA	Visual	2	Inf	Log 2 (chemiluminescence value divided by cutoff, +1)	NA	NA	Fig S2	IgM	Serum_Plasma	NA	NA	NA	Diseased	MCLIA	NP and Spike	SARS-CoV-2	Human	Chongqing	Long	2020	﻿10.1101/2020.03.18.20038018	NA	BB	1	Long_2020_38018	Patient21	24	24	Exact	Symptom onset	Log 2 (chemiluminescence value divided by cutoff, +1)	1.7	NA	POS	NA	NA	Visual	2
1	Long_Patient2138018	27	27	NA	NA	Exact	Symptom onset	1.9	NA	NA	NA	Visual	2	Inf	Log 2 (chemiluminescence value divided by cutoff, +1)	NA	NA	Fig S2	IgM	Serum_Plasma	NA	NA	NA	Diseased	MCLIA	NP and Spike	SARS-CoV-2	Human	Chongqing	Long	2020	﻿10.1101/2020.03.18.20038018	NA	BB	1	Long_2020_38018	Patient21	27	27	Exact	Symptom onset	Log 2 (chemiluminescence value divided by cutoff, +1)	1.9	NA	POS	NA	NA	Visual	2
1	Long_Patient2138018	30	30	NA	NA	Exact	Symptom onset	1.8	NA	NA	NA	Visual	2	Inf	Log 2 (chemiluminescence value divided by cutoff, +1)	NA	NA	Fig S2	IgM	Serum_Plasma	NA	NA	NA	Diseased	MCLIA	NP and Spike	SARS-CoV-2	Human	Chongqing	Long	2020	﻿10.1101/2020.03.18.20038018	NA	BB	1	Long_2020_38018	Patient21	30	30	Exact	Symptom onset	Log 2 (chemiluminescence value divided by cutoff, +1)	1.8	NA	POS	NA	NA	Visual	2
1	Long_Patient2138018	33	33	NA	NA	Exact	Symptom onset	1.8	NA	NA	NA	Visual	2	Inf	Log 2 (chemiluminescence value divided by cutoff, +1)	NA	NA	Fig S2	IgM	Serum_Plasma	NA	NA	NA	Diseased	MCLIA	NP and Spike	SARS-CoV-2	Human	Chongqing	Long	2020	﻿10.1101/2020.03.18.20038018	NA	BB	1	Long_2020_38018	Patient21	33	33	Exact	Symptom onset	Log 2 (chemiluminescence value divided by cutoff, +1)	1.8	NA	POS	NA	NA	Visual	2
1	Long_Patient2738018	7	7	NA	NA	Exact	Symptom onset	0	NA	NA	NA	Visual	2	Inf	Log 2 (chemiluminescence value divided by cutoff, +1)	NA	NA	Fig S2	IgG	Serum_Plasma	NA	NA	NA	Diseased	MCLIA	NP and Spike	SARS-CoV-2	Human	Chongqing	Long	2020	﻿10.1101/2020.03.18.20038018	NA	BB	1	Long_2020_38018	Patient27	7	7	Exact	Symptom onset	Log 2 (chemiluminescence value divided by cutoff, +1)	0	NA	NEG	NA	NA	Visual	2
1	Long_Patient2738018	10	10	NA	NA	Exact	Symptom onset	0	NA	NA	NA	Visual	2	Inf	Log 2 (chemiluminescence value divided by cutoff, +1)	NA	NA	Fig S2	IgG	Serum_Plasma	NA	NA	NA	Diseased	MCLIA	NP and Spike	SARS-CoV-2	Human	Chongqing	Long	2020	﻿10.1101/2020.03.18.20038018	NA	BB	1	Long_2020_38018	Patient27	10	10	Exact	Symptom onset	Log 2 (chemiluminescence value divided by cutoff, +1)	0	NA	NEG	NA	NA	Visual	2
1	Long_Patient2738018	22	22	NA	NA	Exact	Symptom onset	2.9	NA	NA	NA	Visual	2	Inf	Log 2 (chemiluminescence value divided by cutoff, +1)	NA	NA	Fig S2	IgG	Serum_Plasma	NA	NA	NA	Diseased	MCLIA	NP and Spike	SARS-CoV-2	Human	Chongqing	Long	2020	﻿10.1101/2020.03.18.20038018	NA	BB	1	Long_2020_38018	Patient27	22	22	Exact	Symptom onset	Log 2 (chemiluminescence value divided by cutoff, +1)	2.9	NA	POS	NA	NA	Visual	2
1	Long_Patient2738018	25	25	NA	NA	Exact	Symptom onset	3.4	NA	NA	NA	Visual	2	Inf	Log 2 (chemiluminescence value divided by cutoff, +1)	NA	NA	Fig S2	IgG	Serum_Plasma	NA	NA	NA	Diseased	MCLIA	NP and Spike	SARS-CoV-2	Human	Chongqing	Long	2020	﻿10.1101/2020.03.18.20038018	NA	BB	1	Long_2020_38018	Patient27	25	25	Exact	Symptom onset	Log 2 (chemiluminescence value divided by cutoff, +1)	3.4	NA	POS	NA	NA	Visual	2
1	Long_Patient2738018	28	28	NA	NA	Exact	Symptom onset	3.1	NA	NA	NA	Visual	2	Inf	Log 2 (chemiluminescence value divided by cutoff, +1)	NA	NA	Fig S2	IgG	Serum_Plasma	NA	NA	NA	Diseased	MCLIA	NP and Spike	SARS-CoV-2	Human	Chongqing	Long	2020	﻿10.1101/2020.03.18.20038018	NA	BB	1	Long_2020_38018	Patient27	28	28	Exact	Symptom onset	Log 2 (chemiluminescence value divided by cutoff, +1)	3.1	NA	POS	NA	NA	Visual	2
1	Long_Patient2738018	7	7	NA	NA	Exact	Symptom onset	1.4	NA	NA	NA	Visual	2	Inf	Log 2 (chemiluminescence value divided by cutoff, +1)	NA	NA	Fig S2	IgM	Serum_Plasma	NA	NA	NA	Diseased	MCLIA	NP and Spike	SARS-CoV-2	Human	Chongqing	Long	2020	﻿10.1101/2020.03.18.20038018	NA	BB	1	Long_2020_38018	Patient27	7	7	Exact	Symptom onset	Log 2 (chemiluminescence value divided by cutoff, +1)	1.4	NA	POS	NA	NA	Visual	2
1	Long_Patient2738018	10	10	NA	NA	Exact	Symptom onset	3.3	NA	NA	NA	Visual	2	Inf	Log 2 (chemiluminescence value divided by cutoff, +1)	NA	NA	Fig S2	IgM	Serum_Plasma	NA	NA	NA	Diseased	MCLIA	NP and Spike	SARS-CoV-2	Human	Chongqing	Long	2020	﻿10.1101/2020.03.18.20038018	NA	BB	1	Long_2020_38018	Patient27	10	10	Exact	Symptom onset	Log 2 (chemiluminescence value divided by cutoff, +1)	3.3	NA	POS	NA	NA	Visual	2
1	Long_Patient2738018	22	22	NA	NA	Exact	Symptom onset	3	NA	NA	NA	Visual	2	Inf	Log 2 (chemiluminescence value divided by cutoff, +1)	NA	NA	Fig S2	IgM	Serum_Plasma	NA	NA	NA	Diseased	MCLIA	NP and Spike	SARS-CoV-2	Human	Chongqing	Long	2020	﻿10.1101/2020.03.18.20038018	NA	BB	1	Long_2020_38018	Patient27	22	22	Exact	Symptom onset	Log 2 (chemiluminescence value divided by cutoff, +1)	3	NA	POS	NA	NA	Visual	2
1	Long_Patient2738018	25	25	NA	NA	Exact	Symptom onset	3.1	NA	NA	NA	Visual	2	Inf	Log 2 (chemiluminescence value divided by cutoff, +1)	NA	NA	Fig S2	IgM	Serum_Plasma	NA	NA	NA	Diseased	MCLIA	NP and Spike	SARS-CoV-2	Human	Chongqing	Long	2020	﻿10.1101/2020.03.18.20038018	NA	BB	1	Long_2020_38018	Patient27	25	25	Exact	Symptom onset	Log 2 (chemiluminescence value divided by cutoff, +1)	3.1	NA	POS	NA	NA	Visual	2
1	Long_Patient2738018	28	28	NA	NA	Exact	Symptom onset	2.9	NA	NA	NA	Visual	2	Inf	Log 2 (chemiluminescence value divided by cutoff, +1)	NA	NA	Fig S2	IgM	Serum_Plasma	NA	NA	NA	Diseased	MCLIA	NP and Spike	SARS-CoV-2	Human	Chongqing	Long	2020	﻿10.1101/2020.03.18.20038018	NA	BB	1	Long_2020_38018	Patient27	28	28	Exact	Symptom onset	Log 2 (chemiluminescence value divided by cutoff, +1)	2.9	NA	POS	NA	NA	Visual	2
1	Long_Patient2238018	16	16	NA	NA	Exact	Symptom onset	0	NA	NA	NA	Visual	2	Inf	Log 2 (chemiluminescence value divided by cutoff, +1)	NA	NA	Fig S2	IgG	Serum_Plasma	NA	NA	NA	Diseased	MCLIA	NP and Spike	SARS-CoV-2	Human	Chongqing	Long	2020	﻿10.1101/2020.03.18.20038018	NA	BB	1	Long_2020_38018	Patient22	16	16	Exact	Symptom onset	Log 2 (chemiluminescence value divided by cutoff, +1)	0	NA	NEG	NA	NA	Visual	2
1	Long_Patient2238018	19	19	NA	NA	Exact	Symptom onset	1.4	NA	NA	NA	Visual	2	Inf	Log 2 (chemiluminescence value divided by cutoff, +1)	NA	NA	Fig S2	IgG	Serum_Plasma	NA	NA	NA	Diseased	MCLIA	NP and Spike	SARS-CoV-2	Human	Chongqing	Long	2020	﻿10.1101/2020.03.18.20038018	NA	BB	1	Long_2020_38018	Patient22	19	19	Exact	Symptom onset	Log 2 (chemiluminescence value divided by cutoff, +1)	1.4	NA	POS	NA	NA	Visual	2
1	Long_Patient2238018	16	16	NA	NA	Exact	Symptom onset	2.5	NA	NA	NA	Visual	2	Inf	Log 2 (chemiluminescence value divided by cutoff, +1)	NA	NA	Fig S2	IgM	Serum_Plasma	NA	NA	NA	Diseased	MCLIA	NP and Spike	SARS-CoV-2	Human	Chongqing	Long	2020	﻿10.1101/2020.03.18.20038018	NA	BB	1	Long_2020_38018	Patient22	16	16	Exact	Symptom onset	Log 2 (chemiluminescence value divided by cutoff, +1)	2.5	NA	POS	NA	NA	Visual	2
1	Long_Patient2238018	19	19	NA	NA	Exact	Symptom onset	2.3	NA	NA	NA	Visual	2	Inf	Log 2 (chemiluminescence value divided by cutoff, +1)	NA	NA	Fig S2	IgM	Serum_Plasma	NA	NA	NA	Diseased	MCLIA	NP and Spike	SARS-CoV-2	Human	Chongqing	Long	2020	﻿10.1101/2020.03.18.20038018	NA	BB	1	Long_2020_38018	Patient22	19	19	Exact	Symptom onset	Log 2 (chemiluminescence value divided by cutoff, +1)	2.3	NA	POS	NA	NA	Visual	2
1	Long_Patient838018	5	5	NA	NA	Exact	Symptom onset	0	NA	NA	NA	Visual	2	Inf	Log 2 (chemiluminescence value divided by cutoff, +1)	NA	NA	Fig S2	IgG	Serum_Plasma	NA	NA	NA	Diseased	MCLIA	NP and Spike	SARS-CoV-2	Human	Chongqing	Long	2020	﻿10.1101/2020.03.18.20038018	NA	BB	1	Long_2020_38018	Patient8	5	5	Exact	Symptom onset	Log 2 (chemiluminescence value divided by cutoff, +1)	0	NA	NEG	NA	NA	Visual	2
1	Long_Patient838018	8	8	NA	NA	Exact	Symptom onset	1.1	NA	NA	NA	Visual	2	Inf	Log 2 (chemiluminescence value divided by cutoff, +1)	NA	NA	Fig S2	IgG	Serum_Plasma	NA	NA	NA	Diseased	MCLIA	NP and Spike	SARS-CoV-2	Human	Chongqing	Long	2020	﻿10.1101/2020.03.18.20038018	NA	BB	1	Long_2020_38018	Patient8	8	8	Exact	Symptom onset	Log 2 (chemiluminescence value divided by cutoff, +1)	1.1	NA	POS	NA	NA	Visual	2
1	Long_Patient838018	11	11	NA	NA	Exact	Symptom onset	1.6	NA	NA	NA	Visual	2	Inf	Log 2 (chemiluminescence value divided by cutoff, +1)	NA	NA	Fig S2	IgG	Serum_Plasma	NA	NA	NA	Diseased	MCLIA	NP and Spike	SARS-CoV-2	Human	Chongqing	Long	2020	﻿10.1101/2020.03.18.20038018	NA	BB	1	Long_2020_38018	Patient8	11	11	Exact	Symptom onset	Log 2 (chemiluminescence value divided by cutoff, +1)	1.6	NA	POS	NA	NA	Visual	2
1	Long_Patient838018	14	14	NA	NA	Exact	Symptom onset	1.4	NA	NA	NA	Visual	2	Inf	Log 2 (chemiluminescence value divided by cutoff, +1)	NA	NA	Fig S2	IgG	Serum_Plasma	NA	NA	NA	Diseased	MCLIA	NP and Spike	SARS-CoV-2	Human	Chongqing	Long	2020	﻿10.1101/2020.03.18.20038018	NA	BB	1	Long_2020_38018	Patient8	14	14	Exact	Symptom onset	Log 2 (chemiluminescence value divided by cutoff, +1)	1.4	NA	POS	NA	NA	Visual	2
1	Long_Patient838018	17	17	NA	NA	Exact	Symptom onset	1.9	NA	NA	NA	Visual	2	Inf	Log 2 (chemiluminescence value divided by cutoff, +1)	NA	NA	Fig S2	IgG	Serum_Plasma	NA	NA	NA	Diseased	MCLIA	NP and Spike	SARS-CoV-2	Human	Chongqing	Long	2020	﻿10.1101/2020.03.18.20038018	NA	BB	1	Long_2020_38018	Patient8	17	17	Exact	Symptom onset	Log 2 (chemiluminescence value divided by cutoff, +1)	1.9	NA	POS	NA	NA	Visual	2
1	Long_Patient838018	5	5	NA	NA	Exact	Symptom onset	0	NA	NA	NA	Visual	2	Inf	Log 2 (chemiluminescence value divided by cutoff, +1)	NA	NA	Fig S2	IgM	Serum_Plasma	NA	NA	NA	Diseased	MCLIA	NP and Spike	SARS-CoV-2	Human	Chongqing	Long	2020	﻿10.1101/2020.03.18.20038018	NA	BB	1	Long_2020_38018	Patient8	5	5	Exact	Symptom onset	Log 2 (chemiluminescence value divided by cutoff, +1)	0	NA	NEG	NA	NA	Visual	2
1	Long_Patient838018	8	8	NA	NA	Exact	Symptom onset	1.1	NA	NA	NA	Visual	2	Inf	Log 2 (chemiluminescence value divided by cutoff, +1)	NA	NA	Fig S2	IgM	Serum_Plasma	NA	NA	NA	Diseased	MCLIA	NP and Spike	SARS-CoV-2	Human	Chongqing	Long	2020	﻿10.1101/2020.03.18.20038018	NA	BB	1	Long_2020_38018	Patient8	8	8	Exact	Symptom onset	Log 2 (chemiluminescence value divided by cutoff, +1)	1.1	NA	POS	NA	NA	Visual	2
1	Long_Patient838018	11	11	NA	NA	Exact	Symptom onset	1.6	NA	NA	NA	Visual	2	Inf	Log 2 (chemiluminescence value divided by cutoff, +1)	NA	NA	Fig S2	IgM	Serum_Plasma	NA	NA	NA	Diseased	MCLIA	NP and Spike	SARS-CoV-2	Human	Chongqing	Long	2020	﻿10.1101/2020.03.18.20038018	NA	BB	1	Long_2020_38018	Patient8	11	11	Exact	Symptom onset	Log 2 (chemiluminescence value divided by cutoff, +1)	1.6	NA	POS	NA	NA	Visual	2
1	Long_Patient838018	14	14	NA	NA	Exact	Symptom onset	1.4	NA	NA	NA	Visual	2	Inf	Log 2 (chemiluminescence value divided by cutoff, +1)	NA	NA	Fig S2	IgM	Serum_Plasma	NA	NA	NA	Diseased	MCLIA	NP and Spike	SARS-CoV-2	Human	Chongqing	Long	2020	﻿10.1101/2020.03.18.20038018	NA	BB	1	Long_2020_38018	Patient8	14	14	Exact	Symptom onset	Log 2 (chemiluminescence value divided by cutoff, +1)	1.4	NA	POS	NA	NA	Visual	2
1	Long_Patient838018	17	17	NA	NA	Exact	Symptom onset	1.9	NA	NA	NA	Visual	2	Inf	Log 2 (chemiluminescence value divided by cutoff, +1)	NA	NA	Fig S2	IgM	Serum_Plasma	NA	NA	NA	Diseased	MCLIA	NP and Spike	SARS-CoV-2	Human	Chongqing	Long	2020	﻿10.1101/2020.03.18.20038018	NA	BB	1	Long_2020_38018	Patient8	17	17	Exact	Symptom onset	Log 2 (chemiluminescence value divided by cutoff, +1)	1.9	NA	POS	NA	NA	Visual	2
1	Long_Patient2638018	6	6	NA	NA	Exact	Symptom onset	0	NA	NA	NA	Visual	2	Inf	Log 2 (chemiluminescence value divided by cutoff, +1)	NA	NA	Fig S2	IgG	Serum_Plasma	NA	NA	NA	Diseased	MCLIA	NP and Spike	SARS-CoV-2	Human	Chongqing	Long	2020	﻿10.1101/2020.03.18.20038018	NA	BB	1	Long_2020_38018	Patient26	6	6	Exact	Symptom onset	Log 2 (chemiluminescence value divided by cutoff, +1)	0	NA	NEG	NA	NA	Visual	2
1	Long_Patient2638018	9	9	NA	NA	Exact	Symptom onset	0	NA	NA	NA	Visual	2	Inf	Log 2 (chemiluminescence value divided by cutoff, +1)	NA	NA	Fig S2	IgG	Serum_Plasma	NA	NA	NA	Diseased	MCLIA	NP and Spike	SARS-CoV-2	Human	Chongqing	Long	2020	﻿10.1101/2020.03.18.20038018	NA	BB	1	Long_2020_38018	Patient26	9	9	Exact	Symptom onset	Log 2 (chemiluminescence value divided by cutoff, +1)	0	NA	NEG	NA	NA	Visual	2
1	Long_Patient2638018	12	12	NA	NA	Exact	Symptom onset	0	NA	NA	NA	Visual	2	Inf	Log 2 (chemiluminescence value divided by cutoff, +1)	NA	NA	Fig S2	IgG	Serum_Plasma	NA	NA	NA	Diseased	MCLIA	NP and Spike	SARS-CoV-2	Human	Chongqing	Long	2020	﻿10.1101/2020.03.18.20038018	NA	BB	1	Long_2020_38018	Patient26	12	12	Exact	Symptom onset	Log 2 (chemiluminescence value divided by cutoff, +1)	0	NA	NEG	NA	NA	Visual	2
1	Long_Patient2638018	15	15	NA	NA	Exact	Symptom onset	0	NA	NA	NA	Visual	2	Inf	Log 2 (chemiluminescence value divided by cutoff, +1)	NA	NA	Fig S2	IgG	Serum_Plasma	NA	NA	NA	Diseased	MCLIA	NP and Spike	SARS-CoV-2	Human	Chongqing	Long	2020	﻿10.1101/2020.03.18.20038018	NA	BB	1	Long_2020_38018	Patient26	15	15	Exact	Symptom onset	Log 2 (chemiluminescence value divided by cutoff, +1)	0	NA	NEG	NA	NA	Visual	2
1	Long_Patient2638018	16	16	NA	NA	Exact	Symptom onset	0	NA	NA	NA	Visual	2	Inf	Log 2 (chemiluminescence value divided by cutoff, +1)	NA	NA	Fig S2	IgG	Serum_Plasma	NA	NA	NA	Diseased	MCLIA	NP and Spike	SARS-CoV-2	Human	Chongqing	Long	2020	﻿10.1101/2020.03.18.20038018	NA	BB	1	Long_2020_38018	Patient26	16	16	Exact	Symptom onset	Log 2 (chemiluminescence value divided by cutoff, +1)	0	NA	NEG	NA	NA	Visual	2
1	Long_Patient2638018	21	21	NA	NA	Exact	Symptom onset	1.1	NA	NA	NA	Visual	2	Inf	Log 2 (chemiluminescence value divided by cutoff, +1)	NA	NA	Fig S2	IgG	Serum_Plasma	NA	NA	NA	Diseased	MCLIA	NP and Spike	SARS-CoV-2	Human	Chongqing	Long	2020	﻿10.1101/2020.03.18.20038018	NA	BB	1	Long_2020_38018	Patient26	21	21	Exact	Symptom onset	Log 2 (chemiluminescence value divided by cutoff, +1)	1.1	NA	POS	NA	NA	Visual	2
1	Long_Patient2638018	6	6	NA	NA	Exact	Symptom onset	0	NA	NA	NA	Visual	2	Inf	Log 2 (chemiluminescence value divided by cutoff, +1)	NA	NA	Fig S2	IgM	Serum_Plasma	NA	NA	NA	Diseased	MCLIA	NP and Spike	SARS-CoV-2	Human	Chongqing	Long	2020	﻿10.1101/2020.03.18.20038018	NA	BB	1	Long_2020_38018	Patient26	6	6	Exact	Symptom onset	Log 2 (chemiluminescence value divided by cutoff, +1)	0	NA	NEG	NA	NA	Visual	2
1	Long_Patient2638018	9	9	NA	NA	Exact	Symptom onset	0	NA	NA	NA	Visual	2	Inf	Log 2 (chemiluminescence value divided by cutoff, +1)	NA	NA	Fig S2	IgM	Serum_Plasma	NA	NA	NA	Diseased	MCLIA	NP and Spike	SARS-CoV-2	Human	Chongqing	Long	2020	﻿10.1101/2020.03.18.20038018	NA	BB	1	Long_2020_38018	Patient26	9	9	Exact	Symptom onset	Log 2 (chemiluminescence value divided by cutoff, +1)	0	NA	NEG	NA	NA	Visual	2
1	Long_Patient2638018	12	12	NA	NA	Exact	Symptom onset	0	NA	NA	NA	Visual	2	Inf	Log 2 (chemiluminescence value divided by cutoff, +1)	NA	NA	Fig S2	IgM	Serum_Plasma	NA	NA	NA	Diseased	MCLIA	NP and Spike	SARS-CoV-2	Human	Chongqing	Long	2020	﻿10.1101/2020.03.18.20038018	NA	BB	1	Long_2020_38018	Patient26	12	12	Exact	Symptom onset	Log 2 (chemiluminescence value divided by cutoff, +1)	0	NA	NEG	NA	NA	Visual	2
1	Long_Patient2638018	15	15	NA	NA	Exact	Symptom onset	1.5	NA	NA	NA	Visual	2	Inf	Log 2 (chemiluminescence value divided by cutoff, +1)	NA	NA	Fig S2	IgM	Serum_Plasma	NA	NA	NA	Diseased	MCLIA	NP and Spike	SARS-CoV-2	Human	Chongqing	Long	2020	﻿10.1101/2020.03.18.20038018	NA	BB	1	Long_2020_38018	Patient26	15	15	Exact	Symptom onset	Log 2 (chemiluminescence value divided by cutoff, +1)	1.5	NA	POS	NA	NA	Visual	2
1	Long_Patient2638018	16	16	NA	NA	Exact	Symptom onset	1.3	NA	NA	NA	Visual	2	Inf	Log 2 (chemiluminescence value divided by cutoff, +1)	NA	NA	Fig S2	IgM	Serum_Plasma	NA	NA	NA	Diseased	MCLIA	NP and Spike	SARS-CoV-2	Human	Chongqing	Long	2020	﻿10.1101/2020.03.18.20038018	NA	BB	1	Long_2020_38018	Patient26	16	16	Exact	Symptom onset	Log 2 (chemiluminescence value divided by cutoff, +1)	1.3	NA	POS	NA	NA	Visual	2
1	Long_Patient2638018	21	21	NA	NA	Exact	Symptom onset	1.4	NA	NA	NA	Visual	2	Inf	Log 2 (chemiluminescence value divided by cutoff, +1)	NA	NA	Fig S2	IgM	Serum_Plasma	NA	NA	NA	Diseased	MCLIA	NP and Spike	SARS-CoV-2	Human	Chongqing	Long	2020	﻿10.1101/2020.03.18.20038018	NA	BB	1	Long_2020_38018	Patient26	21	21	Exact	Symptom onset	Log 2 (chemiluminescence value divided by cutoff, +1)	1.4	NA	POS	NA	NA	Visual	2
1	Long_Patient138018	4	4	NA	NA	Exact	Symptom onset	5.3	NA	NA	NA	Visual	2	Inf	Log 2 (chemiluminescence value divided by cutoff, +1)	NA	NA	Fig S2	IgG	Serum_Plasma	NA	NA	NA	Diseased	MCLIA	NP and Spike	SARS-CoV-2	Human	Chongqing	Long	2020	﻿10.1101/2020.03.18.20038018	NA	BB	1	Long_2020_38018	Patient1	4	4	Exact	Symptom onset	Log 2 (chemiluminescence value divided by cutoff, +1)	5.3	NA	POS	NA	NA	Visual	2
1	Long_Patient138018	7	7	NA	NA	Exact	Symptom onset	7.8	NA	NA	NA	Visual	2	Inf	Log 2 (chemiluminescence value divided by cutoff, +1)	NA	NA	Fig S2	IgG	Serum_Plasma	NA	NA	NA	Diseased	MCLIA	NP and Spike	SARS-CoV-2	Human	Chongqing	Long	2020	﻿10.1101/2020.03.18.20038018	NA	BB	1	Long_2020_38018	Patient1	7	7	Exact	Symptom onset	Log 2 (chemiluminescence value divided by cutoff, +1)	7.8	NA	POS	NA	NA	Visual	2
1	Long_Patient138018	10	10	NA	NA	Exact	Symptom onset	8	NA	NA	NA	Visual	2	Inf	Log 2 (chemiluminescence value divided by cutoff, +1)	NA	NA	Fig S2	IgG	Serum_Plasma	NA	NA	NA	Diseased	MCLIA	NP and Spike	SARS-CoV-2	Human	Chongqing	Long	2020	﻿10.1101/2020.03.18.20038018	NA	BB	1	Long_2020_38018	Patient1	10	10	Exact	Symptom onset	Log 2 (chemiluminescence value divided by cutoff, +1)	8	NA	POS	NA	NA	Visual	2
1	Long_Patient138018	13	13	NA	NA	Exact	Symptom onset	8	NA	NA	NA	Visual	2	Inf	Log 2 (chemiluminescence value divided by cutoff, +1)	NA	NA	Fig S2	IgG	Serum_Plasma	NA	NA	NA	Diseased	MCLIA	NP and Spike	SARS-CoV-2	Human	Chongqing	Long	2020	﻿10.1101/2020.03.18.20038018	NA	BB	1	Long_2020_38018	Patient1	13	13	Exact	Symptom onset	Log 2 (chemiluminescence value divided by cutoff, +1)	8	NA	POS	NA	NA	Visual	2
1	Long_Patient138018	4	4	NA	NA	Exact	Symptom onset	0	NA	NA	NA	Visual	2	Inf	Log 2 (chemiluminescence value divided by cutoff, +1)	NA	NA	Fig S2	IgM	Serum_Plasma	NA	NA	NA	Diseased	MCLIA	NP and Spike	SARS-CoV-2	Human	Chongqing	Long	2020	﻿10.1101/2020.03.18.20038018	NA	BB	1	Long_2020_38018	Patient1	4	4	Exact	Symptom onset	Log 2 (chemiluminescence value divided by cutoff, +1)	0	NA	NEG	NA	NA	Visual	2
1	Long_Patient138018	7	7	NA	NA	Exact	Symptom onset	0	NA	NA	NA	Visual	2	Inf	Log 2 (chemiluminescence value divided by cutoff, +1)	NA	NA	Fig S2	IgM	Serum_Plasma	NA	NA	NA	Diseased	MCLIA	NP and Spike	SARS-CoV-2	Human	Chongqing	Long	2020	﻿10.1101/2020.03.18.20038018	NA	BB	1	Long_2020_38018	Patient1	7	7	Exact	Symptom onset	Log 2 (chemiluminescence value divided by cutoff, +1)	0	NA	NEG	NA	NA	Visual	2
1	Long_Patient138018	10	10	NA	NA	Exact	Symptom onset	1	NA	NA	NA	Visual	2	Inf	Log 2 (chemiluminescence value divided by cutoff, +1)	NA	NA	Fig S2	IgM	Serum_Plasma	NA	NA	NA	Diseased	MCLIA	NP and Spike	SARS-CoV-2	Human	Chongqing	Long	2020	﻿10.1101/2020.03.18.20038018	NA	BB	1	Long_2020_38018	Patient1	10	10	Exact	Symptom onset	Log 2 (chemiluminescence value divided by cutoff, +1)	1	NA	POS	NA	NA	Visual	2
1	Long_Patient138018	13	13	NA	NA	Exact	Symptom onset	1	NA	NA	NA	Visual	2	Inf	Log 2 (chemiluminescence value divided by cutoff, +1)	NA	NA	Fig S2	IgM	Serum_Plasma	NA	NA	NA	Diseased	MCLIA	NP and Spike	SARS-CoV-2	Human	Chongqing	Long	2020	﻿10.1101/2020.03.18.20038018	NA	BB	1	Long_2020_38018	Patient1	13	13	Exact	Symptom onset	Log 2 (chemiluminescence value divided by cutoff, +1)	1	NA	POS	NA	NA	Visual	2
1	Long_Patient1938018	10	10	NA	NA	Exact	Symptom onset	0	NA	NA	NA	Visual	2	Inf	Log 2 (chemiluminescence value divided by cutoff, +1)	NA	NA	Fig S2	IgG	Serum_Plasma	NA	NA	NA	Diseased	MCLIA	NP and Spike	SARS-CoV-2	Human	Chongqing	Long	2020	﻿10.1101/2020.03.18.20038018	NA	BB	1	Long_2020_38018	Patient19	10	10	Exact	Symptom onset	Log 2 (chemiluminescence value divided by cutoff, +1)	0	NA	NEG	NA	NA	Visual	2
1	Long_Patient1938018	16	16	NA	NA	Exact	Symptom onset	1.4	NA	NA	NA	Visual	2	Inf	Log 2 (chemiluminescence value divided by cutoff, +1)	NA	NA	Fig S2	IgG	Serum_Plasma	NA	NA	NA	Diseased	MCLIA	NP and Spike	SARS-CoV-2	Human	Chongqing	Long	2020	﻿10.1101/2020.03.18.20038018	NA	BB	1	Long_2020_38018	Patient19	16	16	Exact	Symptom onset	Log 2 (chemiluminescence value divided by cutoff, +1)	1.4	NA	POS	NA	NA	Visual	2
1	Long_Patient1938018	19	19	NA	NA	Exact	Symptom onset	1.8	NA	NA	NA	Visual	2	Inf	Log 2 (chemiluminescence value divided by cutoff, +1)	NA	NA	Fig S2	IgG	Serum_Plasma	NA	NA	NA	Diseased	MCLIA	NP and Spike	SARS-CoV-2	Human	Chongqing	Long	2020	﻿10.1101/2020.03.18.20038018	NA	BB	1	Long_2020_38018	Patient19	19	19	Exact	Symptom onset	Log 2 (chemiluminescence value divided by cutoff, +1)	1.8	NA	POS	NA	NA	Visual	2
1	Long_Patient1938018	22	22	NA	NA	Exact	Symptom onset	2.8	NA	NA	NA	Visual	2	Inf	Log 2 (chemiluminescence value divided by cutoff, +1)	NA	NA	Fig S2	IgG	Serum_Plasma	NA	NA	NA	Diseased	MCLIA	NP and Spike	SARS-CoV-2	Human	Chongqing	Long	2020	﻿10.1101/2020.03.18.20038018	NA	BB	1	Long_2020_38018	Patient19	22	22	Exact	Symptom onset	Log 2 (chemiluminescence value divided by cutoff, +1)	2.8	NA	POS	NA	NA	Visual	2
1	Long_Patient1938018	10	10	NA	NA	Exact	Symptom onset	0	NA	NA	NA	Visual	2	Inf	Log 2 (chemiluminescence value divided by cutoff, +1)	NA	NA	Fig S2	IgM	Serum_Plasma	NA	NA	NA	Diseased	MCLIA	NP and Spike	SARS-CoV-2	Human	Chongqing	Long	2020	﻿10.1101/2020.03.18.20038018	NA	BB	1	Long_2020_38018	Patient19	10	10	Exact	Symptom onset	Log 2 (chemiluminescence value divided by cutoff, +1)	0	NA	NEG	NA	NA	Visual	2
1	Long_Patient1938018	16	16	NA	NA	Exact	Symptom onset	1	NA	NA	NA	Visual	2	Inf	Log 2 (chemiluminescence value divided by cutoff, +1)	NA	NA	Fig S2	IgM	Serum_Plasma	NA	NA	NA	Diseased	MCLIA	NP and Spike	SARS-CoV-2	Human	Chongqing	Long	2020	﻿10.1101/2020.03.18.20038018	NA	BB	1	Long_2020_38018	Patient19	16	16	Exact	Symptom onset	Log 2 (chemiluminescence value divided by cutoff, +1)	1	NA	POS	NA	NA	Visual	2
1	Long_Patient1938018	19	19	NA	NA	Exact	Symptom onset	1.2	NA	NA	NA	Visual	2	Inf	Log 2 (chemiluminescence value divided by cutoff, +1)	NA	NA	Fig S2	IgM	Serum_Plasma	NA	NA	NA	Diseased	MCLIA	NP and Spike	SARS-CoV-2	Human	Chongqing	Long	2020	﻿10.1101/2020.03.18.20038018	NA	BB	1	Long_2020_38018	Patient19	19	19	Exact	Symptom onset	Log 2 (chemiluminescence value divided by cutoff, +1)	1.2	NA	POS	NA	NA	Visual	2
1	Long_Patient1938018	22	22	NA	NA	Exact	Symptom onset	2.3	NA	NA	NA	Visual	2	Inf	Log 2 (chemiluminescence value divided by cutoff, +1)	NA	NA	Fig S2	IgM	Serum_Plasma	NA	NA	NA	Diseased	MCLIA	NP and Spike	SARS-CoV-2	Human	Chongqing	Long	2020	﻿10.1101/2020.03.18.20038018	NA	BB	1	Long_2020_38018	Patient19	22	22	Exact	Symptom onset	Log 2 (chemiluminescence value divided by cutoff, +1)	2.3	NA	POS	NA	NA	Visual	2
1	Long_Patient638018	4	4	NA	NA	Exact	Symptom onset	0	NA	NA	NA	Visual	2	Inf	Log 2 (chemiluminescence value divided by cutoff, +1)	NA	NA	Fig S2	IgG	Serum_Plasma	NA	NA	NA	Diseased	MCLIA	NP and Spike	SARS-CoV-2	Human	Chongqing	Long	2020	﻿10.1101/2020.03.18.20038018	NA	BB	1	Long_2020_38018	Patient6	4	4	Exact	Symptom onset	Log 2 (chemiluminescence value divided by cutoff, +1)	0	NA	NEG	NA	NA	Visual	2
1	Long_Patient638018	7	7	NA	NA	Exact	Symptom onset	2.9	NA	NA	NA	Visual	2	Inf	Log 2 (chemiluminescence value divided by cutoff, +1)	NA	NA	Fig S2	IgG	Serum_Plasma	NA	NA	NA	Diseased	MCLIA	NP and Spike	SARS-CoV-2	Human	Chongqing	Long	2020	﻿10.1101/2020.03.18.20038018	NA	BB	1	Long_2020_38018	Patient6	7	7	Exact	Symptom onset	Log 2 (chemiluminescence value divided by cutoff, +1)	2.9	NA	POS	NA	NA	Visual	2
1	Long_Patient638018	10	10	NA	NA	Exact	Symptom onset	5	NA	NA	NA	Visual	2	Inf	Log 2 (chemiluminescence value divided by cutoff, +1)	NA	NA	Fig S2	IgG	Serum_Plasma	NA	NA	NA	Diseased	MCLIA	NP and Spike	SARS-CoV-2	Human	Chongqing	Long	2020	﻿10.1101/2020.03.18.20038018	NA	BB	1	Long_2020_38018	Patient6	10	10	Exact	Symptom onset	Log 2 (chemiluminescence value divided by cutoff, +1)	5	NA	POS	NA	NA	Visual	2
1	Long_Patient638018	13	13	NA	NA	Exact	Symptom onset	5.2	NA	NA	NA	Visual	2	Inf	Log 2 (chemiluminescence value divided by cutoff, +1)	NA	NA	Fig S2	IgG	Serum_Plasma	NA	NA	NA	Diseased	MCLIA	NP and Spike	SARS-CoV-2	Human	Chongqing	Long	2020	﻿10.1101/2020.03.18.20038018	NA	BB	1	Long_2020_38018	Patient6	13	13	Exact	Symptom onset	Log 2 (chemiluminescence value divided by cutoff, +1)	5.2	NA	POS	NA	NA	Visual	2
1	Long_Patient638018	16	16	NA	NA	Exact	Symptom onset	4.9	NA	NA	NA	Visual	2	Inf	Log 2 (chemiluminescence value divided by cutoff, +1)	NA	NA	Fig S2	IgG	Serum_Plasma	NA	NA	NA	Diseased	MCLIA	NP and Spike	SARS-CoV-2	Human	Chongqing	Long	2020	﻿10.1101/2020.03.18.20038018	NA	BB	1	Long_2020_38018	Patient6	16	16	Exact	Symptom onset	Log 2 (chemiluminescence value divided by cutoff, +1)	4.9	NA	POS	NA	NA	Visual	2
1	Long_Patient638018	4	4	NA	NA	Exact	Symptom onset	0	NA	NA	NA	Visual	2	Inf	Log 2 (chemiluminescence value divided by cutoff, +1)	NA	NA	Fig S2	IgM	Serum_Plasma	NA	NA	NA	Diseased	MCLIA	NP and Spike	SARS-CoV-2	Human	Chongqing	Long	2020	﻿10.1101/2020.03.18.20038018	NA	BB	1	Long_2020_38018	Patient6	4	4	Exact	Symptom onset	Log 2 (chemiluminescence value divided by cutoff, +1)	0	NA	NEG	NA	NA	Visual	2
1	Long_Patient638018	7	7	NA	NA	Exact	Symptom onset	0	NA	NA	NA	Visual	2	Inf	Log 2 (chemiluminescence value divided by cutoff, +1)	NA	NA	Fig S2	IgM	Serum_Plasma	NA	NA	NA	Diseased	MCLIA	NP and Spike	SARS-CoV-2	Human	Chongqing	Long	2020	﻿10.1101/2020.03.18.20038018	NA	BB	1	Long_2020_38018	Patient6	7	7	Exact	Symptom onset	Log 2 (chemiluminescence value divided by cutoff, +1)	0	NA	NEG	NA	NA	Visual	2
1	Long_Patient638018	10	10	NA	NA	Exact	Symptom onset	0	NA	NA	NA	Visual	2	Inf	Log 2 (chemiluminescence value divided by cutoff, +1)	NA	NA	Fig S2	IgM	Serum_Plasma	NA	NA	NA	Diseased	MCLIA	NP and Spike	SARS-CoV-2	Human	Chongqing	Long	2020	﻿10.1101/2020.03.18.20038018	NA	BB	1	Long_2020_38018	Patient6	10	10	Exact	Symptom onset	Log 2 (chemiluminescence value divided by cutoff, +1)	0	NA	NEG	NA	NA	Visual	2
1	Long_Patient638018	13	13	NA	NA	Exact	Symptom onset	0	NA	NA	NA	Visual	2	Inf	Log 2 (chemiluminescence value divided by cutoff, +1)	NA	NA	Fig S2	IgM	Serum_Plasma	NA	NA	NA	Diseased	MCLIA	NP and Spike	SARS-CoV-2	Human	Chongqing	Long	2020	﻿10.1101/2020.03.18.20038018	NA	BB	1	Long_2020_38018	Patient6	13	13	Exact	Symptom onset	Log 2 (chemiluminescence value divided by cutoff, +1)	0	NA	NEG	NA	NA	Visual	2
1	Long_Patient638018	16	16	NA	NA	Exact	Symptom onset	0	NA	NA	NA	Visual	2	Inf	Log 2 (chemiluminescence value divided by cutoff, +1)	NA	NA	Fig S2	IgM	Serum_Plasma	NA	NA	NA	Diseased	MCLIA	NP and Spike	SARS-CoV-2	Human	Chongqing	Long	2020	﻿10.1101/2020.03.18.20038018	NA	BB	1	Long_2020_38018	Patient6	16	16	Exact	Symptom onset	Log 2 (chemiluminescence value divided by cutoff, +1)	0	NA	NEG	NA	NA	Visual	2
1	Long_Patient1138018	12	12	NA	NA	Exact	Symptom onset	1.2	NA	NA	NA	Visual	2	Inf	Log 2 (chemiluminescence value divided by cutoff, +1)	NA	NA	Fig S2	IgG	Serum_Plasma	NA	NA	NA	Diseased	MCLIA	NP and Spike	SARS-CoV-2	Human	Chongqing	Long	2020	﻿10.1101/2020.03.18.20038018	NA	BB	1	Long_2020_38018	Patient11	12	12	Exact	Symptom onset	Log 2 (chemiluminescence value divided by cutoff, +1)	1.2	NA	POS	NA	NA	Visual	2
1	Long_Patient1138018	18	18	NA	NA	Exact	Symptom onset	1.8	NA	NA	NA	Visual	2	Inf	Log 2 (chemiluminescence value divided by cutoff, +1)	NA	NA	Fig S2	IgG	Serum_Plasma	NA	NA	NA	Diseased	MCLIA	NP and Spike	SARS-CoV-2	Human	Chongqing	Long	2020	﻿10.1101/2020.03.18.20038018	NA	BB	1	Long_2020_38018	Patient11	18	18	Exact	Symptom onset	Log 2 (chemiluminescence value divided by cutoff, +1)	1.8	NA	POS	NA	NA	Visual	2
1	Long_Patient1138018	21	21	NA	NA	Exact	Symptom onset	1.9	NA	NA	NA	Visual	2	Inf	Log 2 (chemiluminescence value divided by cutoff, +1)	NA	NA	Fig S2	IgG	Serum_Plasma	NA	NA	NA	Diseased	MCLIA	NP and Spike	SARS-CoV-2	Human	Chongqing	Long	2020	﻿10.1101/2020.03.18.20038018	NA	BB	1	Long_2020_38018	Patient11	21	21	Exact	Symptom onset	Log 2 (chemiluminescence value divided by cutoff, +1)	1.9	NA	POS	NA	NA	Visual	2
1	Long_Patient1138018	24	24	NA	NA	Exact	Symptom onset	1.9	NA	NA	NA	Visual	2	Inf	Log 2 (chemiluminescence value divided by cutoff, +1)	NA	NA	Fig S2	IgG	Serum_Plasma	NA	NA	NA	Diseased	MCLIA	NP and Spike	SARS-CoV-2	Human	Chongqing	Long	2020	﻿10.1101/2020.03.18.20038018	NA	BB	1	Long_2020_38018	Patient11	24	24	Exact	Symptom onset	Log 2 (chemiluminescence value divided by cutoff, +1)	1.9	NA	POS	NA	NA	Visual	2
1	Long_Patient1138018	27	27	NA	NA	Exact	Symptom onset	2.5	NA	NA	NA	Visual	2	Inf	Log 2 (chemiluminescence value divided by cutoff, +1)	NA	NA	Fig S2	IgG	Serum_Plasma	NA	NA	NA	Diseased	MCLIA	NP and Spike	SARS-CoV-2	Human	Chongqing	Long	2020	﻿10.1101/2020.03.18.20038018	NA	BB	1	Long_2020_38018	Patient11	27	27	Exact	Symptom onset	Log 2 (chemiluminescence value divided by cutoff, +1)	2.5	NA	POS	NA	NA	Visual	2
1	Long_Patient1138018	30	30	NA	NA	Exact	Symptom onset	2.2	NA	NA	NA	Visual	2	Inf	Log 2 (chemiluminescence value divided by cutoff, +1)	NA	NA	Fig S2	IgG	Serum_Plasma	NA	NA	NA	Diseased	MCLIA	NP and Spike	SARS-CoV-2	Human	Chongqing	Long	2020	﻿10.1101/2020.03.18.20038018	NA	BB	1	Long_2020_38018	Patient11	30	30	Exact	Symptom onset	Log 2 (chemiluminescence value divided by cutoff, +1)	2.2	NA	POS	NA	NA	Visual	2
1	Long_Patient1138018	12	12	NA	NA	Exact	Symptom onset	0	NA	NA	NA	Visual	2	Inf	Log 2 (chemiluminescence value divided by cutoff, +1)	NA	NA	Fig S2	IgM	Serum_Plasma	NA	NA	NA	Diseased	MCLIA	NP and Spike	SARS-CoV-2	Human	Chongqing	Long	2020	﻿10.1101/2020.03.18.20038018	NA	BB	1	Long_2020_38018	Patient11	12	12	Exact	Symptom onset	Log 2 (chemiluminescence value divided by cutoff, +1)	0	NA	NEG	NA	NA	Visual	2
1	Long_Patient1138018	18	18	NA	NA	Exact	Symptom onset	1.1	NA	NA	NA	Visual	2	Inf	Log 2 (chemiluminescence value divided by cutoff, +1)	NA	NA	Fig S2	IgM	Serum_Plasma	NA	NA	NA	Diseased	MCLIA	NP and Spike	SARS-CoV-2	Human	Chongqing	Long	2020	﻿10.1101/2020.03.18.20038018	NA	BB	1	Long_2020_38018	Patient11	18	18	Exact	Symptom onset	Log 2 (chemiluminescence value divided by cutoff, +1)	1.1	NA	POS	NA	NA	Visual	2
1	Long_Patient1138018	21	21	NA	NA	Exact	Symptom onset	1.5	NA	NA	NA	Visual	2	Inf	Log 2 (chemiluminescence value divided by cutoff, +1)	NA	NA	Fig S2	IgM	Serum_Plasma	NA	NA	NA	Diseased	MCLIA	NP and Spike	SARS-CoV-2	Human	Chongqing	Long	2020	﻿10.1101/2020.03.18.20038018	NA	BB	1	Long_2020_38018	Patient11	21	21	Exact	Symptom onset	Log 2 (chemiluminescence value divided by cutoff, +1)	1.5	NA	POS	NA	NA	Visual	2
1	Long_Patient1138018	24	24	NA	NA	Exact	Symptom onset	1.4	NA	NA	NA	Visual	2	Inf	Log 2 (chemiluminescence value divided by cutoff, +1)	NA	NA	Fig S2	IgM	Serum_Plasma	NA	NA	NA	Diseased	MCLIA	NP and Spike	SARS-CoV-2	Human	Chongqing	Long	2020	﻿10.1101/2020.03.18.20038018	NA	BB	1	Long_2020_38018	Patient11	24	24	Exact	Symptom onset	Log 2 (chemiluminescence value divided by cutoff, +1)	1.4	NA	POS	NA	NA	Visual	2
1	Long_Patient1138018	27	27	NA	NA	Exact	Symptom onset	1.9	NA	NA	NA	Visual	2	Inf	Log 2 (chemiluminescence value divided by cutoff, +1)	NA	NA	Fig S2	IgM	Serum_Plasma	NA	NA	NA	Diseased	MCLIA	NP and Spike	SARS-CoV-2	Human	Chongqing	Long	2020	﻿10.1101/2020.03.18.20038018	NA	BB	1	Long_2020_38018	Patient11	27	27	Exact	Symptom onset	Log 2 (chemiluminescence value divided by cutoff, +1)	1.9	NA	POS	NA	NA	Visual	2
1	Long_Patient1138018	30	30	NA	NA	Exact	Symptom onset	1.4	NA	NA	NA	Visual	2	Inf	Log 2 (chemiluminescence value divided by cutoff, +1)	NA	NA	Fig S2	IgM	Serum_Plasma	NA	NA	NA	Diseased	MCLIA	NP and Spike	SARS-CoV-2	Human	Chongqing	Long	2020	﻿10.1101/2020.03.18.20038018	NA	BB	1	Long_2020_38018	Patient11	30	30	Exact	Symptom onset	Log 2 (chemiluminescence value divided by cutoff, +1)	1.4	NA	POS	NA	NA	Visual	2
1	Long_Patient2538018	2	2	NA	NA	Exact	Symptom onset	0	NA	NA	NA	Visual	2	Inf	Log 2 (chemiluminescence value divided by cutoff, +1)	NA	NA	Fig S2	IgG	Serum_Plasma	NA	NA	NA	Diseased	MCLIA	NP and Spike	SARS-CoV-2	Human	Chongqing	Long	2020	﻿10.1101/2020.03.18.20038018	NA	BB	1	Long_2020_38018	Patient25	2	2	Exact	Symptom onset	Log 2 (chemiluminescence value divided by cutoff, +1)	0	NA	NEG	NA	NA	Visual	2
1	Long_Patient2538018	5	5	NA	NA	Exact	Symptom onset	1	NA	NA	NA	Visual	2	Inf	Log 2 (chemiluminescence value divided by cutoff, +1)	NA	NA	Fig S2	IgG	Serum_Plasma	NA	NA	NA	Diseased	MCLIA	NP and Spike	SARS-CoV-2	Human	Chongqing	Long	2020	﻿10.1101/2020.03.18.20038018	NA	BB	1	Long_2020_38018	Patient25	5	5	Exact	Symptom onset	Log 2 (chemiluminescence value divided by cutoff, +1)	1	NA	POS	NA	NA	Visual	2
1	Long_Patient2538018	8	8	NA	NA	Exact	Symptom onset	0	NA	NA	NA	Visual	2	Inf	Log 2 (chemiluminescence value divided by cutoff, +1)	NA	NA	Fig S2	IgG	Serum_Plasma	NA	NA	NA	Diseased	MCLIA	NP and Spike	SARS-CoV-2	Human	Chongqing	Long	2020	﻿10.1101/2020.03.18.20038018	NA	BB	1	Long_2020_38018	Patient25	8	8	Exact	Symptom onset	Log 2 (chemiluminescence value divided by cutoff, +1)	0	NA	NEG	NA	NA	Visual	2
1	Long_Patient2538018	11	11	NA	NA	Exact	Symptom onset	1	NA	NA	NA	Visual	2	Inf	Log 2 (chemiluminescence value divided by cutoff, +1)	NA	NA	Fig S2	IgG	Serum_Plasma	NA	NA	NA	Diseased	MCLIA	NP and Spike	SARS-CoV-2	Human	Chongqing	Long	2020	﻿10.1101/2020.03.18.20038018	NA	BB	1	Long_2020_38018	Patient25	11	11	Exact	Symptom onset	Log 2 (chemiluminescence value divided by cutoff, +1)	1	NA	POS	NA	NA	Visual	2
1	Long_Patient2538018	14	14	NA	NA	Exact	Symptom onset	1.2	NA	NA	NA	Visual	2	Inf	Log 2 (chemiluminescence value divided by cutoff, +1)	NA	NA	Fig S2	IgG	Serum_Plasma	NA	NA	NA	Diseased	MCLIA	NP and Spike	SARS-CoV-2	Human	Chongqing	Long	2020	﻿10.1101/2020.03.18.20038018	NA	BB	1	Long_2020_38018	Patient25	14	14	Exact	Symptom onset	Log 2 (chemiluminescence value divided by cutoff, +1)	1.2	NA	POS	NA	NA	Visual	2
1	Long_Patient2538018	17	17	NA	NA	Exact	Symptom onset	1	NA	NA	NA	Visual	2	Inf	Log 2 (chemiluminescence value divided by cutoff, +1)	NA	NA	Fig S2	IgG	Serum_Plasma	NA	NA	NA	Diseased	MCLIA	NP and Spike	SARS-CoV-2	Human	Chongqing	Long	2020	﻿10.1101/2020.03.18.20038018	NA	BB	1	Long_2020_38018	Patient25	17	17	Exact	Symptom onset	Log 2 (chemiluminescence value divided by cutoff, +1)	1	NA	POS	NA	NA	Visual	2
1	Long_Patient2538018	20	20	NA	NA	Exact	Symptom onset	1.8	NA	NA	NA	Visual	2	Inf	Log 2 (chemiluminescence value divided by cutoff, +1)	NA	NA	Fig S2	IgG	Serum_Plasma	NA	NA	NA	Diseased	MCLIA	NP and Spike	SARS-CoV-2	Human	Chongqing	Long	2020	﻿10.1101/2020.03.18.20038018	NA	BB	1	Long_2020_38018	Patient25	20	20	Exact	Symptom onset	Log 2 (chemiluminescence value divided by cutoff, +1)	1.8	NA	POS	NA	NA	Visual	2
1	Long_Patient2538018	23	23	NA	NA	Exact	Symptom onset	1.7	NA	NA	NA	Visual	2	Inf	Log 2 (chemiluminescence value divided by cutoff, +1)	NA	NA	Fig S2	IgG	Serum_Plasma	NA	NA	NA	Diseased	MCLIA	NP and Spike	SARS-CoV-2	Human	Chongqing	Long	2020	﻿10.1101/2020.03.18.20038018	NA	BB	1	Long_2020_38018	Patient25	23	23	Exact	Symptom onset	Log 2 (chemiluminescence value divided by cutoff, +1)	1.7	NA	POS	NA	NA	Visual	2
1	Long_Patient2538018	26	26	NA	NA	Exact	Symptom onset	1.5	NA	NA	NA	Visual	2	Inf	Log 2 (chemiluminescence value divided by cutoff, +1)	NA	NA	Fig S2	IgG	Serum_Plasma	NA	NA	NA	Diseased	MCLIA	NP and Spike	SARS-CoV-2	Human	Chongqing	Long	2020	﻿10.1101/2020.03.18.20038018	NA	BB	1	Long_2020_38018	Patient25	26	26	Exact	Symptom onset	Log 2 (chemiluminescence value divided by cutoff, +1)	1.5	NA	POS	NA	NA	Visual	2
1	Long_Patient2538018	2	2	NA	NA	Exact	Symptom onset	0	NA	NA	NA	Visual	2	Inf	Log 2 (chemiluminescence value divided by cutoff, +1)	NA	NA	Fig S2	IgM	Serum_Plasma	NA	NA	NA	Diseased	MCLIA	NP and Spike	SARS-CoV-2	Human	Chongqing	Long	2020	﻿10.1101/2020.03.18.20038018	NA	BB	1	Long_2020_38018	Patient25	2	2	Exact	Symptom onset	Log 2 (chemiluminescence value divided by cutoff, +1)	0	NA	NEG	NA	NA	Visual	2
1	Long_Patient2538018	5	5	NA	NA	Exact	Symptom onset	0	NA	NA	NA	Visual	2	Inf	Log 2 (chemiluminescence value divided by cutoff, +1)	NA	NA	Fig S2	IgM	Serum_Plasma	NA	NA	NA	Diseased	MCLIA	NP and Spike	SARS-CoV-2	Human	Chongqing	Long	2020	﻿10.1101/2020.03.18.20038018	NA	BB	1	Long_2020_38018	Patient25	5	5	Exact	Symptom onset	Log 2 (chemiluminescence value divided by cutoff, +1)	0	NA	NEG	NA	NA	Visual	2
1	Long_Patient2538018	8	8	NA	NA	Exact	Symptom onset	0	NA	NA	NA	Visual	2	Inf	Log 2 (chemiluminescence value divided by cutoff, +1)	NA	NA	Fig S2	IgM	Serum_Plasma	NA	NA	NA	Diseased	MCLIA	NP and Spike	SARS-CoV-2	Human	Chongqing	Long	2020	﻿10.1101/2020.03.18.20038018	NA	BB	1	Long_2020_38018	Patient25	8	8	Exact	Symptom onset	Log 2 (chemiluminescence value divided by cutoff, +1)	0	NA	NEG	NA	NA	Visual	2
1	Long_Patient2538018	11	11	NA	NA	Exact	Symptom onset	0	NA	NA	NA	Visual	2	Inf	Log 2 (chemiluminescence value divided by cutoff, +1)	NA	NA	Fig S2	IgM	Serum_Plasma	NA	NA	NA	Diseased	MCLIA	NP and Spike	SARS-CoV-2	Human	Chongqing	Long	2020	﻿10.1101/2020.03.18.20038018	NA	BB	1	Long_2020_38018	Patient25	11	11	Exact	Symptom onset	Log 2 (chemiluminescence value divided by cutoff, +1)	0	NA	NEG	NA	NA	Visual	2
1	Long_Patient2538018	14	14	NA	NA	Exact	Symptom onset	0	NA	NA	NA	Visual	2	Inf	Log 2 (chemiluminescence value divided by cutoff, +1)	NA	NA	Fig S2	IgM	Serum_Plasma	NA	NA	NA	Diseased	MCLIA	NP and Spike	SARS-CoV-2	Human	Chongqing	Long	2020	﻿10.1101/2020.03.18.20038018	NA	BB	1	Long_2020_38018	Patient25	14	14	Exact	Symptom onset	Log 2 (chemiluminescence value divided by cutoff, +1)	0	NA	NEG	NA	NA	Visual	2
1	Long_Patient2538018	17	17	NA	NA	Exact	Symptom onset	0	NA	NA	NA	Visual	2	Inf	Log 2 (chemiluminescence value divided by cutoff, +1)	NA	NA	Fig S2	IgM	Serum_Plasma	NA	NA	NA	Diseased	MCLIA	NP and Spike	SARS-CoV-2	Human	Chongqing	Long	2020	﻿10.1101/2020.03.18.20038018	NA	BB	1	Long_2020_38018	Patient25	17	17	Exact	Symptom onset	Log 2 (chemiluminescence value divided by cutoff, +1)	0	NA	NEG	NA	NA	Visual	2
1	Long_Patient2538018	20	20	NA	NA	Exact	Symptom onset	0	NA	NA	NA	Visual	2	Inf	Log 2 (chemiluminescence value divided by cutoff, +1)	NA	NA	Fig S2	IgM	Serum_Plasma	NA	NA	NA	Diseased	MCLIA	NP and Spike	SARS-CoV-2	Human	Chongqing	Long	2020	﻿10.1101/2020.03.18.20038018	NA	BB	1	Long_2020_38018	Patient25	20	20	Exact	Symptom onset	Log 2 (chemiluminescence value divided by cutoff, +1)	0	NA	NEG	NA	NA	Visual	2
1	Long_Patient2538018	23	23	NA	NA	Exact	Symptom onset	0	NA	NA	NA	Visual	2	Inf	Log 2 (chemiluminescence value divided by cutoff, +1)	NA	NA	Fig S2	IgM	Serum_Plasma	NA	NA	NA	Diseased	MCLIA	NP and Spike	SARS-CoV-2	Human	Chongqing	Long	2020	﻿10.1101/2020.03.18.20038018	NA	BB	1	Long_2020_38018	Patient25	23	23	Exact	Symptom onset	Log 2 (chemiluminescence value divided by cutoff, +1)	0	NA	NEG	NA	NA	Visual	2
1	Long_Patient2538018	26	26	NA	NA	Exact	Symptom onset	0	NA	NA	NA	Visual	2	Inf	Log 2 (chemiluminescence value divided by cutoff, +1)	NA	NA	Fig S2	IgM	Serum_Plasma	NA	NA	NA	Diseased	MCLIA	NP and Spike	SARS-CoV-2	Human	Chongqing	Long	2020	﻿10.1101/2020.03.18.20038018	NA	BB	1	Long_2020_38018	Patient25	26	26	Exact	Symptom onset	Log 2 (chemiluminescence value divided by cutoff, +1)	0	NA	NEG	NA	NA	Visual	2
1	Long_Patient738018	5	5	NA	NA	Exact	Symptom onset	0	NA	NA	NA	Visual	2	Inf	Log 2 (chemiluminescence value divided by cutoff, +1)	NA	NA	Fig S2	IgG	Serum_Plasma	NA	NA	NA	Diseased	MCLIA	NP and Spike	SARS-CoV-2	Human	Chongqing	Long	2020	﻿10.1101/2020.03.18.20038018	NA	BB	1	Long_2020_38018	Patient7	5	5	Exact	Symptom onset	Log 2 (chemiluminescence value divided by cutoff, +1)	0	NA	NEG	NA	NA	Visual	2
1	Long_Patient738018	8	8	NA	NA	Exact	Symptom onset	1.5	NA	NA	NA	Visual	2	Inf	Log 2 (chemiluminescence value divided by cutoff, +1)	NA	NA	Fig S2	IgG	Serum_Plasma	NA	NA	NA	Diseased	MCLIA	NP and Spike	SARS-CoV-2	Human	Chongqing	Long	2020	﻿10.1101/2020.03.18.20038018	NA	BB	1	Long_2020_38018	Patient7	8	8	Exact	Symptom onset	Log 2 (chemiluminescence value divided by cutoff, +1)	1.5	NA	POS	NA	NA	Visual	2
1	Long_Patient738018	11	11	NA	NA	Exact	Symptom onset	2.9	NA	NA	NA	Visual	2	Inf	Log 2 (chemiluminescence value divided by cutoff, +1)	NA	NA	Fig S2	IgG	Serum_Plasma	NA	NA	NA	Diseased	MCLIA	NP and Spike	SARS-CoV-2	Human	Chongqing	Long	2020	﻿10.1101/2020.03.18.20038018	NA	BB	1	Long_2020_38018	Patient7	11	11	Exact	Symptom onset	Log 2 (chemiluminescence value divided by cutoff, +1)	2.9	NA	POS	NA	NA	Visual	2
1	Long_Patient738018	14	14	NA	NA	Exact	Symptom onset	2.9	NA	NA	NA	Visual	2	Inf	Log 2 (chemiluminescence value divided by cutoff, +1)	NA	NA	Fig S2	IgG	Serum_Plasma	NA	NA	NA	Diseased	MCLIA	NP and Spike	SARS-CoV-2	Human	Chongqing	Long	2020	﻿10.1101/2020.03.18.20038018	NA	BB	1	Long_2020_38018	Patient7	14	14	Exact	Symptom onset	Log 2 (chemiluminescence value divided by cutoff, +1)	2.9	NA	POS	NA	NA	Visual	2
1	Long_Patient738018	5	5	NA	NA	Exact	Symptom onset	0	NA	NA	NA	Visual	2	Inf	Log 2 (chemiluminescence value divided by cutoff, +1)	NA	NA	Fig S2	IgM	Serum_Plasma	NA	NA	NA	Diseased	MCLIA	NP and Spike	SARS-CoV-2	Human	Chongqing	Long	2020	﻿10.1101/2020.03.18.20038018	NA	BB	1	Long_2020_38018	Patient7	5	5	Exact	Symptom onset	Log 2 (chemiluminescence value divided by cutoff, +1)	0	NA	NEG	NA	NA	Visual	2
1	Long_Patient738018	8	8	NA	NA	Exact	Symptom onset	0	NA	NA	NA	Visual	2	Inf	Log 2 (chemiluminescence value divided by cutoff, +1)	NA	NA	Fig S2	IgM	Serum_Plasma	NA	NA	NA	Diseased	MCLIA	NP and Spike	SARS-CoV-2	Human	Chongqing	Long	2020	﻿10.1101/2020.03.18.20038018	NA	BB	1	Long_2020_38018	Patient7	8	8	Exact	Symptom onset	Log 2 (chemiluminescence value divided by cutoff, +1)	0	NA	NEG	NA	NA	Visual	2
1	Long_Patient738018	11	11	NA	NA	Exact	Symptom onset	2	NA	NA	NA	Visual	2	Inf	Log 2 (chemiluminescence value divided by cutoff, +1)	NA	NA	Fig S2	IgM	Serum_Plasma	NA	NA	NA	Diseased	MCLIA	NP and Spike	SARS-CoV-2	Human	Chongqing	Long	2020	﻿10.1101/2020.03.18.20038018	NA	BB	1	Long_2020_38018	Patient7	11	11	Exact	Symptom onset	Log 2 (chemiluminescence value divided by cutoff, +1)	2	NA	POS	NA	NA	Visual	2
1	Long_Patient738018	14	14	NA	NA	Exact	Symptom onset	1.9	NA	NA	NA	Visual	2	Inf	Log 2 (chemiluminescence value divided by cutoff, +1)	NA	NA	Fig S2	IgM	Serum_Plasma	NA	NA	NA	Diseased	MCLIA	NP and Spike	SARS-CoV-2	Human	Chongqing	Long	2020	﻿10.1101/2020.03.18.20038018	NA	BB	1	Long_2020_38018	Patient7	14	14	Exact	Symptom onset	Log 2 (chemiluminescence value divided by cutoff, +1)	1.9	NA	POS	NA	NA	Visual	2
1	Long_Patient1638018	7	7	NA	NA	Exact	Symptom onset	0	NA	NA	NA	Visual	2	Inf	Log 2 (chemiluminescence value divided by cutoff, +1)	NA	NA	Fig S2	IgG	Serum_Plasma	NA	NA	NA	Diseased	MCLIA	NP and Spike	SARS-CoV-2	Human	Chongqing	Long	2020	﻿10.1101/2020.03.18.20038018	NA	BB	1	Long_2020_38018	Patient16	7	7	Exact	Symptom onset	Log 2 (chemiluminescence value divided by cutoff, +1)	0	NA	NEG	NA	NA	Visual	2
1	Long_Patient1638018	13	13	NA	NA	Exact	Symptom onset	3	NA	NA	NA	Visual	2	Inf	Log 2 (chemiluminescence value divided by cutoff, +1)	NA	NA	Fig S2	IgG	Serum_Plasma	NA	NA	NA	Diseased	MCLIA	NP and Spike	SARS-CoV-2	Human	Chongqing	Long	2020	﻿10.1101/2020.03.18.20038018	NA	BB	1	Long_2020_38018	Patient16	13	13	Exact	Symptom onset	Log 2 (chemiluminescence value divided by cutoff, +1)	3	NA	POS	NA	NA	Visual	2
1	Long_Patient1638018	16	16	NA	NA	Exact	Symptom onset	3.9	NA	NA	NA	Visual	2	Inf	Log 2 (chemiluminescence value divided by cutoff, +1)	NA	NA	Fig S2	IgG	Serum_Plasma	NA	NA	NA	Diseased	MCLIA	NP and Spike	SARS-CoV-2	Human	Chongqing	Long	2020	﻿10.1101/2020.03.18.20038018	NA	BB	1	Long_2020_38018	Patient16	16	16	Exact	Symptom onset	Log 2 (chemiluminescence value divided by cutoff, +1)	3.9	NA	POS	NA	NA	Visual	2
1	Long_Patient1638018	7	7	NA	NA	Exact	Symptom onset	0	NA	NA	NA	Visual	2	Inf	Log 2 (chemiluminescence value divided by cutoff, +1)	NA	NA	Fig S2	IgM	Serum_Plasma	NA	NA	NA	Diseased	MCLIA	NP and Spike	SARS-CoV-2	Human	Chongqing	Long	2020	﻿10.1101/2020.03.18.20038018	NA	BB	1	Long_2020_38018	Patient16	7	7	Exact	Symptom onset	Log 2 (chemiluminescence value divided by cutoff, +1)	0	NA	NEG	NA	NA	Visual	2
1	Long_Patient1638018	13	13	NA	NA	Exact	Symptom onset	0	NA	NA	NA	Visual	2	Inf	Log 2 (chemiluminescence value divided by cutoff, +1)	NA	NA	Fig S2	IgM	Serum_Plasma	NA	NA	NA	Diseased	MCLIA	NP and Spike	SARS-CoV-2	Human	Chongqing	Long	2020	﻿10.1101/2020.03.18.20038018	NA	BB	1	Long_2020_38018	Patient16	13	13	Exact	Symptom onset	Log 2 (chemiluminescence value divided by cutoff, +1)	0	NA	NEG	NA	NA	Visual	2
1	Long_Patient1638018	16	16	NA	NA	Exact	Symptom onset	1.2	NA	NA	NA	Visual	2	Inf	Log 2 (chemiluminescence value divided by cutoff, +1)	NA	NA	Fig S2	IgM	Serum_Plasma	NA	NA	NA	Diseased	MCLIA	NP and Spike	SARS-CoV-2	Human	Chongqing	Long	2020	﻿10.1101/2020.03.18.20038018	NA	BB	1	Long_2020_38018	Patient16	16	16	Exact	Symptom onset	Log 2 (chemiluminescence value divided by cutoff, +1)	1.2	NA	POS	NA	NA	Visual	2
1	Long_Patient338018	4	4	NA	NA	Exact	Symptom onset	2.6	NA	NA	NA	Visual	2	Inf	Log 2 (chemiluminescence value divided by cutoff, +1)	NA	NA	Fig S2	IgG	Serum_Plasma	NA	NA	NA	Diseased	MCLIA	NP and Spike	SARS-CoV-2	Human	Chongqing	Long	2020	﻿10.1101/2020.03.18.20038018	NA	BB	1	Long_2020_38018	Patient3	4	4	Exact	Symptom onset	Log 2 (chemiluminescence value divided by cutoff, +1)	2.6	NA	POS	NA	NA	Visual	2
1	Long_Patient338018	7	7	NA	NA	Exact	Symptom onset	5.8	NA	NA	NA	Visual	2	Inf	Log 2 (chemiluminescence value divided by cutoff, +1)	NA	NA	Fig S2	IgG	Serum_Plasma	NA	NA	NA	Diseased	MCLIA	NP and Spike	SARS-CoV-2	Human	Chongqing	Long	2020	﻿10.1101/2020.03.18.20038018	NA	BB	1	Long_2020_38018	Patient3	7	7	Exact	Symptom onset	Log 2 (chemiluminescence value divided by cutoff, +1)	5.8	NA	POS	NA	NA	Visual	2
1	Long_Patient338018	10	10	NA	NA	Exact	Symptom onset	6.1	NA	NA	NA	Visual	2	Inf	Log 2 (chemiluminescence value divided by cutoff, +1)	NA	NA	Fig S2	IgG	Serum_Plasma	NA	NA	NA	Diseased	MCLIA	NP and Spike	SARS-CoV-2	Human	Chongqing	Long	2020	﻿10.1101/2020.03.18.20038018	NA	BB	1	Long_2020_38018	Patient3	10	10	Exact	Symptom onset	Log 2 (chemiluminescence value divided by cutoff, +1)	6.1	NA	POS	NA	NA	Visual	2
1	Long_Patient338018	13	13	NA	NA	Exact	Symptom onset	6	NA	NA	NA	Visual	2	Inf	Log 2 (chemiluminescence value divided by cutoff, +1)	NA	NA	Fig S2	IgG	Serum_Plasma	NA	NA	NA	Diseased	MCLIA	NP and Spike	SARS-CoV-2	Human	Chongqing	Long	2020	﻿10.1101/2020.03.18.20038018	NA	BB	1	Long_2020_38018	Patient3	13	13	Exact	Symptom onset	Log 2 (chemiluminescence value divided by cutoff, +1)	6	NA	POS	NA	NA	Visual	2
1	Long_Patient338018	16	16	NA	NA	Exact	Symptom onset	6.3	NA	NA	NA	Visual	2	Inf	Log 2 (chemiluminescence value divided by cutoff, +1)	NA	NA	Fig S2	IgG	Serum_Plasma	NA	NA	NA	Diseased	MCLIA	NP and Spike	SARS-CoV-2	Human	Chongqing	Long	2020	﻿10.1101/2020.03.18.20038018	NA	BB	1	Long_2020_38018	Patient3	16	16	Exact	Symptom onset	Log 2 (chemiluminescence value divided by cutoff, +1)	6.3	NA	POS	NA	NA	Visual	2
1	Long_Patient338018	19	19	NA	NA	Exact	Symptom onset	6.6	NA	NA	NA	Visual	2	Inf	Log 2 (chemiluminescence value divided by cutoff, +1)	NA	NA	Fig S2	IgG	Serum_Plasma	NA	NA	NA	Diseased	MCLIA	NP and Spike	SARS-CoV-2	Human	Chongqing	Long	2020	﻿10.1101/2020.03.18.20038018	NA	BB	1	Long_2020_38018	Patient3	19	19	Exact	Symptom onset	Log 2 (chemiluminescence value divided by cutoff, +1)	6.6	NA	POS	NA	NA	Visual	2
1	Long_Patient338018	4	4	NA	NA	Exact	Symptom onset	0	NA	NA	NA	Visual	2	Inf	Log 2 (chemiluminescence value divided by cutoff, +1)	NA	NA	Fig S2	IgM	Serum_Plasma	NA	NA	NA	Diseased	MCLIA	NP and Spike	SARS-CoV-2	Human	Chongqing	Long	2020	﻿10.1101/2020.03.18.20038018	NA	BB	1	Long_2020_38018	Patient3	4	4	Exact	Symptom onset	Log 2 (chemiluminescence value divided by cutoff, +1)	0	NA	NEG	NA	NA	Visual	2
1	Long_Patient338018	7	7	NA	NA	Exact	Symptom onset	1	NA	NA	NA	Visual	2	Inf	Log 2 (chemiluminescence value divided by cutoff, +1)	NA	NA	Fig S2	IgM	Serum_Plasma	NA	NA	NA	Diseased	MCLIA	NP and Spike	SARS-CoV-2	Human	Chongqing	Long	2020	﻿10.1101/2020.03.18.20038018	NA	BB	1	Long_2020_38018	Patient3	7	7	Exact	Symptom onset	Log 2 (chemiluminescence value divided by cutoff, +1)	1	NA	POS	NA	NA	Visual	2
1	Long_Patient338018	10	10	NA	NA	Exact	Symptom onset	0	NA	NA	NA	Visual	2	Inf	Log 2 (chemiluminescence value divided by cutoff, +1)	NA	NA	Fig S2	IgM	Serum_Plasma	NA	NA	NA	Diseased	MCLIA	NP and Spike	SARS-CoV-2	Human	Chongqing	Long	2020	﻿10.1101/2020.03.18.20038018	NA	BB	1	Long_2020_38018	Patient3	10	10	Exact	Symptom onset	Log 2 (chemiluminescence value divided by cutoff, +1)	0	NA	NEG	NA	NA	Visual	2
1	Long_Patient338018	13	13	NA	NA	Exact	Symptom onset	0	NA	NA	NA	Visual	2	Inf	Log 2 (chemiluminescence value divided by cutoff, +1)	NA	NA	Fig S2	IgM	Serum_Plasma	NA	NA	NA	Diseased	MCLIA	NP and Spike	SARS-CoV-2	Human	Chongqing	Long	2020	﻿10.1101/2020.03.18.20038018	NA	BB	1	Long_2020_38018	Patient3	13	13	Exact	Symptom onset	Log 2 (chemiluminescence value divided by cutoff, +1)	0	NA	NEG	NA	NA	Visual	2
1	Long_Patient338018	16	16	NA	NA	Exact	Symptom onset	1.2	NA	NA	NA	Visual	2	Inf	Log 2 (chemiluminescence value divided by cutoff, +1)	NA	NA	Fig S2	IgM	Serum_Plasma	NA	NA	NA	Diseased	MCLIA	NP and Spike	SARS-CoV-2	Human	Chongqing	Long	2020	﻿10.1101/2020.03.18.20038018	NA	BB	1	Long_2020_38018	Patient3	16	16	Exact	Symptom onset	Log 2 (chemiluminescence value divided by cutoff, +1)	1.2	NA	POS	NA	NA	Visual	2
1	Long_Patient338018	19	19	NA	NA	Exact	Symptom onset	1.3	NA	NA	NA	Visual	2	Inf	Log 2 (chemiluminescence value divided by cutoff, +1)	NA	NA	Fig S2	IgM	Serum_Plasma	NA	NA	NA	Diseased	MCLIA	NP and Spike	SARS-CoV-2	Human	Chongqing	Long	2020	﻿10.1101/2020.03.18.20038018	NA	BB	1	Long_2020_38018	Patient3	19	19	Exact	Symptom onset	Log 2 (chemiluminescence value divided by cutoff, +1)	1.3	NA	POS	NA	NA	Visual	2
54	Long_BB938018	0	7	NA	NA	Period	Symptom onset	1.5	mean	1.6	SD	Visual	2	Inf	Log 2 (chemiluminescence value divided by cutoff, +1)	NA	NA	Fig1A	IgG	Serum_Plasma	NA	NA	NA	Diseased	MCLIA	NP and Spike	SARS-CoV-2	Human	Chongqing	Long	2020	﻿10.1101/2020.03.18.20038018	Figure shows boxplots, estimated standard deviation by multiplying the interquartile box range by 0.75.	BB	54	Long_2020_38018	BB9	0	7	Period	Symptom onset	Log 2 (chemiluminescence value divided by cutoff, +1)	1.5	NA	POS	1.6	Standard deviation from boxplot	Visual	2
54	Long_BB938018	0	7	NA	NA	Period	Symptom onset	0.8	mean	0.8	SD	Visual	2	Inf	Log 2 (chemiluminescence value divided by cutoff, +1)	NA	NA	Fig S3	IgM	Serum_Plasma	NA	NA	NA	Diseased	MCLIA	NP and Spike	SARS-CoV-2	Human	Chongqing	Long	2020	﻿10.1101/2020.03.18.20038018	Figure shows boxplots, estimated standard deviation by multiplying the interquartile box range by 0.75.	BB	54	Long_2020_38018	BB9	0	7	Period	Symptom onset	Log 2 (chemiluminescence value divided by cutoff, +1)	0.8	NA	POS	0.8	Standard deviation from boxplot	Visual	2
130	Long_BB1038018	8	14	NA	NA	Period	Symptom onset	2.8	mean	2.3	SD	Visual	2	Inf	Log 2 (chemiluminescence value divided by cutoff, +1)	NA	NA	Fig1A	IgG	Serum_Plasma	NA	NA	NA	Diseased	MCLIA	NP and Spike	SARS-CoV-2	Human	Chongqing	Long	2020	﻿10.1101/2020.03.18.20038018	Figure shows boxplots, estimated standard deviation by multiplying the interquartile box range by 0.75.	BB	130	Long_2020_38018	BB10	8	14	Period	Symptom onset	Log 2 (chemiluminescence value divided by cutoff, +1)	2.8	NA	POS	2.3	Standard deviation from boxplot	Visual	2
130	Long_BB1038018	8	14	NA	NA	Period	Symptom onset	2	mean	1.7	SD	Visual	2	Inf	Log 2 (chemiluminescence value divided by cutoff, +1)	NA	NA	Fig S4	IgM	Serum_Plasma	NA	NA	NA	Diseased	MCLIA	NP and Spike	SARS-CoV-2	Human	Chongqing	Long	2020	﻿10.1101/2020.03.18.20038018	Figure shows boxplots, estimated standard deviation by multiplying the interquartile box range by 0.75.	BB	130	Long_2020_38018	BB10	8	14	Period	Symptom onset	Log 2 (chemiluminescence value divided by cutoff, +1)	2	NA	POS	1.7	Standard deviation from boxplot	Visual	2
71	Long_BB1138018	15	21	NA	NA	Period	Symptom onset	4	mean	2.1	SD	Visual	2	Inf	Log 2 (chemiluminescence value divided by cutoff, +1)	NA	NA	Fig1A	IgG	Serum_Plasma	NA	NA	NA	Diseased	MCLIA	NP and Spike	SARS-CoV-2	Human	Chongqing	Long	2020	﻿10.1101/2020.03.18.20038018	Figure shows boxplots, estimated standard deviation by multiplying the interquartile box range by 0.75.	BB	71	Long_2020_38018	BB11	15	21	Period	Symptom onset	Log 2 (chemiluminescence value divided by cutoff, +1)	4	NA	POS	2.1	Standard deviation from boxplot	Visual	2
71	Long_BB1138018	15	21	NA	NA	Period	Symptom onset	3	mean	1.8	SD	Visual	2	Inf	Log 2 (chemiluminescence value divided by cutoff, +1)	NA	NA	Fig S5	IgM	Serum_Plasma	NA	NA	NA	Diseased	MCLIA	NP and Spike	SARS-CoV-2	Human	Chongqing	Long	2020	﻿10.1101/2020.03.18.20038018	Figure shows boxplots, estimated standard deviation by multiplying the interquartile box range by 0.75.	BB	71	Long_2020_38018	BB11	15	21	Period	Symptom onset	Log 2 (chemiluminescence value divided by cutoff, +1)	3	NA	POS	1.8	Standard deviation from boxplot	Visual	2
7	Long_BB1238018	21	NA	NA	NA	Period	Symptom onset	4.1	mean	1.4	SD	Visual	2	Inf	Log 2 (chemiluminescence value divided by cutoff, +1)	NA	NA	Fig1A	IgG	Serum_Plasma	NA	NA	NA	Diseased	MCLIA	NP and Spike	SARS-CoV-2	Human	Chongqing	Long	2020	﻿10.1101/2020.03.18.20038018	Figure shows boxplots, estimated standard deviation by multiplying the interquartile box range by 0.75.	BB	7	Long_2020_38018	BB12	21	NA	Period	Symptom onset	Log 2 (chemiluminescence value divided by cutoff, +1)	4.1	NA	POS	1.4	Standard deviation from boxplot	Visual	2
7	Long_BB1238018	21	NA	NA	NA	Period	Symptom onset	2.8	mean	0.9	SD	Visual	2	Inf	Log 2 (chemiluminescence value divided by cutoff, +1)	NA	NA	Fig S6	IgM	Serum_Plasma	NA	NA	NA	Diseased	MCLIA	NP and Spike	SARS-CoV-2	Human	Chongqing	Long	2020	﻿10.1101/2020.03.18.20038018	Figure shows boxplots, estimated standard deviation by multiplying the interquartile box range by 0.75.	BB	7	Long_2020_38018	BB12	21	NA	Period	Symptom onset	Log 2 (chemiluminescence value divided by cutoff, +1)	2.8	NA	POS	0.9	Standard deviation from boxplot	Visual	2
18	Long_BB9-BB12 mixA38018	7	14	NA	NA	Period	Symptom onset	4.5	mean	2.7	SD	Visual	2	Inf	Log 2 (chemiluminescence value divided by cutoff, +1)	NA	NA	Fig 1C	IgG	Serum_Plasma	NA	NA	NA	Diseased	MCLIA	NP and Spike	SARS-CoV-2	Human	Chongqing	Long	2020	﻿10.1101/2020.03.18.20038018	Figure shows boxplots, estimated standard deviation by multiplying the interquartile box range by 0.75.	BB	18	Long_2020_38018	BB9-BB12 mixA	7	14	Period	Symptom onset	Log 2 (chemiluminescence value divided by cutoff, +1)	4.5	NA	POS	2.7	Standard deviation from boxplot	Visual	2
112	Long_BB9-BB12 mixA38018	7	14	NA	NA	Period	Symptom onset	2.8	mean	2.4	SD	Visual	2	Inf	Log 2 (chemiluminescence value divided by cutoff, +1)	NA	NA	Fig 1C	IgG	Serum_Plasma	NA	NA	NA	Diseased	MCLIA	NP and Spike	SARS-CoV-2	Human	Chongqing	Long	2020	﻿10.1101/2020.03.18.20038018	Figure shows boxplots, estimated standard deviation by multiplying the interquartile box range by 0.75.	BB	112	Long_2020_38018	BB9-BB12 mixA	7	14	Period	Symptom onset	Log 2 (chemiluminescence value divided by cutoff, +1)	2.8	NA	POS	2.4	Standard deviation from boxplot	Visual	2
11	Long_BB9-BB12 mixB38018	15	21	NA	NA	Period	Symptom onset	4.5	mean	2.3	SD	Visual	2	Inf	Log 2 (chemiluminescence value divided by cutoff, +1)	NA	NA	Fig 1C	IgG	Serum_Plasma	NA	NA	NA	Diseased	MCLIA	NP and Spike	SARS-CoV-2	Human	Chongqing	Long	2020	﻿10.1101/2020.03.18.20038018	Figure shows boxplots, estimated standard deviation by multiplying the interquartile box range by 0.75.	BB	11	Long_2020_38018	BB9-BB12 mixB	15	21	Period	Symptom onset	Log 2 (chemiluminescence value divided by cutoff, +1)	4.5	NA	POS	2.3	Standard deviation from boxplot	Visual	2
60	Long_BB9-BB12 mixB38018	15	21	NA	NA	Period	Symptom onset	4	mean	2	SD	Visual	2	Inf	Log 2 (chemiluminescence value divided by cutoff, +1)	NA	NA	Fig 1C	IgG	Serum_Plasma	NA	NA	NA	Diseased	MCLIA	NP and Spike	SARS-CoV-2	Human	Chongqing	Long	2020	﻿10.1101/2020.03.18.20038018	Figure shows boxplots, estimated standard deviation by multiplying the interquartile box range by 0.75.	BB	60	Long_2020_38018	BB9-BB12 mixB	15	21	Period	Symptom onset	Log 2 (chemiluminescence value divided by cutoff, +1)	4	NA	POS	2	Standard deviation from boxplot	Visual	2
18	Long_BB9-BB12 mixA38018	7	14	NA	NA	Period	Symptom onset	2	mean	1.5	SD	Visual	2	Inf	Log 2 (chemiluminescence value divided by cutoff, +1)	NA	NA	Fig 1C	IgM	Serum_Plasma	NA	NA	NA	Diseased	MCLIA	NP and Spike	SARS-CoV-2	Human	Chongqing	Long	2020	﻿10.1101/2020.03.18.20038018	Figure shows boxplots, estimated standard deviation by multiplying the interquartile box range by 0.75.	BB	18	Long_2020_38018	BB9-BB12 mixA	7	14	Period	Symptom onset	Log 2 (chemiluminescence value divided by cutoff, +1)	2	NA	POS	1.5	Standard deviation from boxplot	Visual	2
112	Long_BB9-BB12 mixA38018	7	14	NA	NA	Period	Symptom onset	2	mean	1.6	SD	Visual	2	Inf	Log 2 (chemiluminescence value divided by cutoff, +1)	NA	NA	Fig 1C	IgM	Serum_Plasma	NA	NA	NA	Diseased	MCLIA	NP and Spike	SARS-CoV-2	Human	Chongqing	Long	2020	﻿10.1101/2020.03.18.20038018	Figure shows boxplots, estimated standard deviation by multiplying the interquartile box range by 0.75.	BB	112	Long_2020_38018	BB9-BB12 mixA	7	14	Period	Symptom onset	Log 2 (chemiluminescence value divided by cutoff, +1)	2	NA	POS	1.6	Standard deviation from boxplot	Visual	2
11	Long_BB9-BB12 mixB38018	15	21	NA	NA	Period	Symptom onset	3.2	mean	1.9	SD	Visual	2	Inf	Log 2 (chemiluminescence value divided by cutoff, +1)	NA	NA	Fig 1C	IgM	Serum_Plasma	NA	NA	NA	Diseased	MCLIA	NP and Spike	SARS-CoV-2	Human	Chongqing	Long	2020	﻿10.1101/2020.03.18.20038018	Figure shows boxplots, estimated standard deviation by multiplying the interquartile box range by 0.75.	BB	11	Long_2020_38018	BB9-BB12 mixB	15	21	Period	Symptom onset	Log 2 (chemiluminescence value divided by cutoff, +1)	3.2	NA	POS	1.9	Standard deviation from boxplot	Visual	2
60	Long_BB9-BB12 mixB38018	15	21	NA	NA	Period	Symptom onset	2.6	mean	2.3	SD	Visual	2	Inf	Log 2 (chemiluminescence value divided by cutoff, +1)	NA	NA	Fig 1C	IgM	Serum_Plasma	NA	NA	NA	Diseased	MCLIA	NP and Spike	SARS-CoV-2	Human	Chongqing	Long	2020	﻿10.1101/2020.03.18.20038018	Figure shows boxplots, estimated standard deviation by multiplying the interquartile box range by 0.75.	BB	60	Long_2020_38018	BB9-BB12 mixB	15	21	Period	Symptom onset	Log 2 (chemiluminescence value divided by cutoff, +1)	2.6	NA	POS	2.3	Standard deviation from boxplot	Visual	2
80	Lou_Patients all41707	0	NA	NA	NA	Period	Symptom onset	NA	Proportion	NA	Confidence interval	Exact	NA	NA	Binding signal relative to control	1	0.975	Table 2	Total Ab	Serum_Plasma	NA	NA	NA	Diseased	ELISA	Spike	SARS-CoV-2	Human	China	Lou	2020	10.1101/2020.03.23.20041707	probably duplicated from Table 3; all confirmed cases; mixture of critical and non-critical patients; no death; demographic data in Table 1	AMG	80	Lou_2020_41707	Patients all	0	NA	Period	Symptom onset	Binding signal relative to controls	NA	1	NA	0.913-0.997	Confidence interval	Exact	NA
300	Lou_Healthy41707	0	NA	NA	NA	Period	Symptom onset	NA	Proportion	NA	Confidence interval	Exact	NA	NA	Binding signal relative to control	1	0	Table 2	Total Ab	Serum_Plasma	NA	NA	Asymptomatic	Asymptomatic	ELISA	Spike	SARS-CoV-2	Human	China	Lou	2020	10.1101/2020.03.23.20041707	considered healthy	AMG	300	Lou_2020_41707	Healthy	0	NA	Period	Symptom onset	Binding signal relative to controls	NA	1	NA	0.000-0.012	Confidence interval	Exact	NA
80	Lou_Patients all41707	0	NA	NA	NA	Period	Symptom onset	NA	Proportion	NA	Confidence interval	Exact	NA	NA	Binding signal relative to control	1	0.925	Table 2	IgM	Serum_Plasma	NA	NA	NA	Diseased	ELISA	Spike	SARS-CoV-2	Human	China	Lou	2020	10.1101/2020.03.23.20041707	probably duplicated from Table 3; all confirmed cases; mixture of critical and non-critical patients; no death; demographic data in Table 1	AMG	80	Lou_2020_41707	Patients all	0	NA	Period	Symptom onset	Binding signal relative to controls	NA	1	NA	0.844-0.972	Confidence interval	Exact	NA
300	Lou_Healthy41707	0	NA	NA	NA	Period	Symptom onset	NA	Proportion	NA	Confidence interval	Exact	NA	NA	Binding signal relative to control	1	0	Table 2	IgM	Serum_Plasma	NA	NA	Asymptomatic	Asymptomatic	ELISA	Spike	SARS-CoV-2	Human	China	Lou	2020	10.1101/2020.03.23.20041707	considered healthy	AMG	300	Lou_2020_41707	Healthy	0	NA	Period	Symptom onset	Binding signal relative to controls	NA	1	NA	0.000-0.012	Confidence interval	Exact	NA
80	Lou_Patients all41707	0	NA	NA	NA	Period	Symptom onset	NA	Proportion	NA	Confidence interval	Exact	NA	NA	Binding signal relative to control	1	0.888	Table 2	IgG	Serum_Plasma	NA	NA	NA	Diseased	ELISA	NP	SARS-CoV-2	Human	China	Lou	2020	10.1101/2020.03.23.20041707	probably duplicated from Table 3; all confirmed cases; mixture of critical and non-critical patients; no death; demographic data in Table 1	AMG	80	Lou_2020_41707	Patients all	0	NA	Period	Symptom onset	Binding signal relative to controls	NA	1	NA	0.797-0.947	Confidence interval	Exact	NA
300	Lou_Healthy41707	0	NA	NA	NA	Period	Symptom onset	NA	Proportion	NA	Confidence interval	Exact	NA	NA	Binding signal relative to control	1	0	Table 2	IgG	Serum_Plasma	NA	NA	Asymptomatic	Asymptomatic	ELISA	NP	SARS-CoV-2	Human	China	Lou	2020	10.1101/2020.03.23.20041707	considered healthy	AMG	300	Lou_2020_41707	Healthy	0	NA	Period	Symptom onset	Binding signal relative to controls	NA	1	NA	0.000-0.036	Confidence interval	Exact	NA
39	Lou_Patients all41707	0	7	NA	NA	Period	Symptom onset	NA	Proportion	NA	NA	Exact	NA	NA	Binding signal relative to control	1	0.641025641	Table 3	Total Ab	Serum_Plasma	NA	NA	NA	Diseased	ELISA	Spike	SARS-CoV-2	Human	China	Lou	2020	10.1101/2020.03.23.20041707	all confirmed cases; mixture of critical and non-critical patients; no death; demographic data in Table 1	AMG	39	Lou_2020_41707	Patients all	0	7	Period	Symptom onset	Binding signal relative to controls	NA	1	NA	NA	NA	Exact	NA
75	Lou_Patients all41707	8	14	NA	NA	Period	Symptom onset	NA	Proportion	NA	NA	Exact	NA	NA	Binding signal relative to control	1	0.986666667	Table 3	Total Ab	Serum_Plasma	NA	NA	NA	Diseased	ELISA	Spike	SARS-CoV-2	Human	China	Lou	2020	10.1101/2020.03.23.20041707	all confirmed cases; mixture of critical and non-critical patients; no death; demographic data in Table 1	AMG	75	Lou_2020_41707	Patients all	8	14	Period	Symptom onset	Binding signal relative to controls	NA	1	NA	NA	NA	Exact	NA
60	Lou_Patients all41707	15	29	NA	NA	Period	Symptom onset	NA	Proportion	NA	NA	Exact	NA	NA	Binding signal relative to control	1	1	Table 3	Total Ab	Serum_Plasma	NA	NA	NA	Diseased	ELISA	Spike	SARS-CoV-2	Human	China	Lou	2020	10.1101/2020.03.23.20041707	all confirmed cases; mixture of critical and non-critical patients; no death; demographic data in Table 1	AMG	60	Lou_2020_41707	Patients all	15	29	Period	Symptom onset	Binding signal relative to controls	NA	1	NA	NA	NA	Exact	NA
39	Lou_Patients all41707	0	7	NA	NA	Period	Symptom onset	NA	Proportion	NA	NA	Exact	NA	NA	Binding signal relative to control	1	0.333333333	Table 3	IgM	Serum_Plasma	NA	NA	NA	Diseased	ELISA	Spike	SARS-CoV-2	Human	China	Lou	2020	10.1101/2020.03.23.20041707	all confirmed cases; mixture of critical and non-critical patients; no death; demographic data in Table 1	AMG	39	Lou_2020_41707	Patients all	0	7	Period	Symptom onset	Binding signal relative to controls	NA	1	NA	NA	NA	Exact	NA
75	Lou_Patients all41707	8	14	NA	NA	Period	Symptom onset	NA	Proportion	NA	NA	Exact	NA	NA	Binding signal relative to control	1	0.866666667	Table 3	IgM	Serum_Plasma	NA	NA	NA	Diseased	ELISA	Spike	SARS-CoV-2	Human	China	Lou	2020	10.1101/2020.03.23.20041707	all confirmed cases; mixture of critical and non-critical patients; no death; demographic data in Table 1	AMG	75	Lou_2020_41707	Patients all	8	14	Period	Symptom onset	Binding signal relative to controls	NA	1	NA	NA	NA	Exact	NA
60	Lou_Patients all41707	15	29	NA	NA	Period	Symptom onset	NA	Proportion	NA	NA	Exact	NA	NA	Binding signal relative to control	1	0.966666667	Table 3	IgM	Serum_Plasma	NA	NA	NA	Diseased	ELISA	Spike	SARS-CoV-2	Human	China	Lou	2020	10.1101/2020.03.23.20041707	all confirmed cases; mixture of critical and non-critical patients; no death; demographic data in Table 1	AMG	60	Lou_2020_41707	Patients all	15	29	Period	Symptom onset	Binding signal relative to controls	NA	1	NA	NA	NA	Exact	NA
39	Lou_Patients all41707	0	7	NA	NA	Period	Symptom onset	NA	Proportion	NA	NA	Exact	NA	NA	Binding signal relative to control	1	0.333333333	Table 3	IgG	Serum_Plasma	NA	NA	NA	Diseased	ELISA	NP	SARS-CoV-2	Human	China	Lou	2020	10.1101/2020.03.23.20041707	all confirmed cases; mixture of critical and non-critical patients; no death; demographic data in Table 1	AMG	39	Lou_2020_41707	Patients all	0	7	Period	Symptom onset	Binding signal relative to controls	NA	1	NA	NA	NA	Exact	NA
75	Lou_Patients all41707	8	14	NA	NA	Period	Symptom onset	NA	Proportion	NA	NA	Exact	NA	NA	Binding signal relative to control	1	0.76	Table 3	IgG	Serum_Plasma	NA	NA	NA	Diseased	ELISA	NP	SARS-CoV-2	Human	China	Lou	2020	10.1101/2020.03.23.20041707	all confirmed cases; mixture of critical and non-critical patients; no death; demographic data in Table 1	AMG	75	Lou_2020_41707	Patients all	8	14	Period	Symptom onset	Binding signal relative to controls	NA	1	NA	NA	NA	Exact	NA
60	Lou_Patients all41707	15	29	NA	NA	Period	Symptom onset	NA	Proportion	NA	NA	Exact	NA	NA	Binding signal relative to control	1	0.933333333	Table 3	IgG	Serum_Plasma	NA	NA	NA	Diseased	ELISA	NP	SARS-CoV-2	Human	China	Lou	2020	10.1101/2020.03.23.20041707	all confirmed cases; mixture of critical and non-critical patients; no death; demographic data in Table 1	AMG	60	Lou_2020_41707	Patients all	15	29	Period	Symptom onset	Binding signal relative to controls	NA	1	NA	NA	NA	Exact	NA
25	Lou_Short incubation (0-5 days post exposure)41707	13	NA	15-Sep	IQR	Period	Exposure	NA	median	NA	NA	NA	NA	NA	Binding signal relative to control	1	NA	Table 4	NA	Serum_Plasma	NA	yes	NA	Diseased	NA	NA	SARS-CoV-2	Human	China	Lou	2020	10.1101/2020.03.23.20041707	probably duplicated from Table 3; all confirmed cases; mixture of critical and non-critical patients; no death; demographic data in Table 1	AMG	25	Lou_2020_41707	Short incubation (0-5 days post exposure)	13	NA	Median	Exposure	Binding signal relative to controls	NA	1	POS	NA	NA	NA	NA
20	Lou_Long incubation (6-23 days post exposure)41707	21	NA	17-25	IQR	Period	Exposure	NA	median	NA	NA	NA	NA	NA	Binding signal relative to control	1	NA	Table 4	NA	Serum_Plasma	NA	yes	NA	Diseased	NA	NA	SARS-CoV-2	Human	China	Lou	2020	10.1101/2020.03.23.20041707	probably duplicated from Table 3; all confirmed cases; mixture of critical and non-critical patients; no death; demographic data in Table 1	AMG	20	Lou_2020_41707	Long incubation (6-23 days post exposure)	21	NA	Median	Exposure	Binding signal relative to controls	NA	1	POS	NA	NA	NA	NA
25	Lou_Short incubation (0-5 days post exposure)41707	10	NA	12-Sep	IQR	Period	Symptom onset	NA	median	NA	NA	NA	NA	NA	Binding signal relative to control	1	NA	Table 4	NA	Serum_Plasma	NA	yes	NA	Diseased	NA	NA	SARS-CoV-2	Human	China	Lou	2020	10.1101/2020.03.23.20041707	probably duplicated from Table 3; all confirmed cases; mixture of critical and non-critical patients; no death; demographic data in Table 1	AMG	25	Lou_2020_41707	Short incubation (0-5 days post exposure)	10	NA	Median	Symptom onset	Binding signal relative to controls	NA	1	POS	NA	NA	NA	NA
20	Lou_Long incubation (6-23 days post exposure)41707	7	NA	7-Jun	IQR	Period	Symptom onset	NA	median	NA	NA	NA	NA	NA	Binding signal relative to control	1	NA	Table 4	NA	Serum_Plasma	NA	yes	NA	Diseased	NA	NA	SARS-CoV-2	Human	China	Lou	2020	10.1101/2020.03.23.20041707	probably duplicated from Table 3; all confirmed cases; mixture of critical and non-critical patients; no death; demographic data in Table 1	AMG	20	Lou_2020_41707	Long incubation (6-23 days post exposure)	7	NA	Median	Symptom onset	Binding signal relative to controls	NA	1	POS	NA	NA	NA	NA
1	Lou_P1441707	8	8	NA	NA	Exact	Exposure	0	Exact	NA	NA	Visual	NA	NA	Binding signal relative to control	1	NA	Figure 2	Total Ab	Serum_Plasma	NA	NA	Mild_Moderate	Diseased	ELISA	NP and Spike	SARS-CoV-2	Human	China	Lou	2020	10.1101/2020.03.23.20041707	probably included in Table 3; all confirmed cases; mixture of critical and non-critical patients; no death; demographic data in Table 1	AMG	1	Lou_2020_41707	P14	8	8	Unknown	Exposure	Binding signal relative to controls	0	1	NEG	NA	NA	Estimated	NA
1	Lou_P1441707	11	11	NA	NA	Exact	Exposure	0	Exact	NA	NA	Visual	NA	NA	Binding signal relative to control	1	NA	Figure 2	Total Ab	Serum_Plasma	NA	NA	Mild_Moderate	Diseased	ELISA	NP and Spike	SARS-CoV-2	Human	China	Lou	2020	10.1101/2020.03.23.20041707	probably included in Table 3; all confirmed cases; mixture of critical and non-critical patients; no death; demographic data in Table 1	AMG	1	Lou_2020_41707	P14	11	11	Unknown	Exposure	Binding signal relative to controls	0	1	NEG	NA	NA	Estimated	NA
1	Lou_P1741707	5	5	NA	NA	Exact	Exposure	0	Exact	NA	NA	Visual	NA	NA	Binding signal relative to control	1	NA	Figure 2	Total Ab	Serum_Plasma	NA	NA	Mild_Moderate	Diseased	ELISA	NP and Spike	SARS-CoV-2	Human	China	Lou	2020	10.1101/2020.03.23.20041707	probably included in Table 3; all confirmed cases; mixture of critical and non-critical patients; no death; demographic data in Table 1	AMG	1	Lou_2020_41707	P17	5	5	Unknown	Exposure	Binding signal relative to controls	0	1	NEG	NA	NA	Estimated	NA
1	Lou_P6241707	4	4	NA	NA	Exact	Exposure	0	Exact	NA	NA	Visual	NA	NA	Binding signal relative to control	1	NA	Figure 2	Total Ab	Serum_Plasma	NA	NA	Severe_Critical	Diseased	ELISA	NP and Spike	SARS-CoV-2	Human	China	Lou	2020	10.1101/2020.03.23.20041707	probably included in Table 3; all confirmed cases; mixture of critical and non-critical patients; no death; demographic data in Table 1	AMG	1	Lou_2020_41707	P62	4	4	Unknown	Exposure	Binding signal relative to controls	0	1	NEG	NA	NA	Estimated	NA
1	Lou_P7741707	5	5	NA	NA	Exact	Exposure	0	Exact	NA	NA	Visual	NA	NA	Binding signal relative to control	1	NA	Figure 2	Total Ab	Serum_Plasma	NA	NA	Mild_Moderate	Diseased	ELISA	NP and Spike	SARS-CoV-2	Human	China	Lou	2020	10.1101/2020.03.23.20041707	probably included in Table 3; all confirmed cases; mixture of critical and non-critical patients; no death; demographic data in Table 1	AMG	1	Lou_2020_41707	P77	5	5	Unknown	Exposure	Binding signal relative to controls	0	1	NEG	NA	NA	Estimated	NA
1	Lou_P7741707	7	7	NA	NA	Exact	Exposure	0	Exact	NA	NA	Visual	NA	NA	Binding signal relative to control	1	NA	Figure 2	Total Ab	Serum_Plasma	NA	NA	Mild_Moderate	Diseased	ELISA	NP and Spike	SARS-CoV-2	Human	China	Lou	2020	10.1101/2020.03.23.20041707	probably included in Table 3; all confirmed cases; mixture of critical and non-critical patients; no death; demographic data in Table 1	AMG	1	Lou_2020_41707	P77	7	7	Unknown	Exposure	Binding signal relative to controls	0	1	NEG	NA	NA	Estimated	NA
1	Lou_P8141707	5	5	NA	NA	Exact	Exposure	0	Exact	NA	NA	Visual	NA	NA	Binding signal relative to control	1	NA	Figure 2	Total Ab	Serum_Plasma	NA	NA	Severe_Critical	Diseased	ELISA	NP and Spike	SARS-CoV-2	Human	China	Lou	2020	10.1101/2020.03.23.20041707	probably included in Table 3; all confirmed cases; mixture of critical and non-critical patients; no death; demographic data in Table 1	AMG	1	Lou_2020_41707	P81	5	5	Unknown	Exposure	Binding signal relative to controls	0	1	NEG	NA	NA	Estimated	NA
1	Lou_P2041707	10	10	NA	NA	Exact	Exposure	0	Exact	NA	NA	Visual	NA	NA	Binding signal relative to control	1	NA	Figure 2	Total Ab	Serum_Plasma	NA	NA	Mild_Moderate	Diseased	ELISA	NP and Spike	SARS-CoV-2	Human	China	Lou	2020	10.1101/2020.03.23.20041707	probably included in Table 3; all confirmed cases; mixture of critical and non-critical patients; no death; demographic data in Table 1	AMG	1	Lou_2020_41707	P20	10	10	Unknown	Exposure	Binding signal relative to controls	0	1	NEG	NA	NA	Estimated	NA
1	Lou_P0141707	13	13	NA	NA	Exact	Exposure	0	Exact	NA	NA	Visual	NA	NA	Binding signal relative to control	1	NA	Figure 2	Total Ab	Serum_Plasma	NA	NA	Mild_Moderate	Diseased	ELISA	NP and Spike	SARS-CoV-2	Human	China	Lou	2020	10.1101/2020.03.23.20041707	probably included in Table 3; all confirmed cases; mixture of critical and non-critical patients; no death; demographic data in Table 1	AMG	1	Lou_2020_41707	P01	13	13	Unknown	Exposure	Binding signal relative to controls	0	1	NEG	NA	NA	Estimated	NA
1	Lou_P2341707	13	13	NA	NA	Exact	Exposure	0	Exact	NA	NA	Visual	NA	NA	Binding signal relative to control	1	NA	Figure 2	Total Ab	Serum_Plasma	NA	NA	Mild_Moderate	Diseased	ELISA	NP and Spike	SARS-CoV-2	Human	China	Lou	2020	10.1101/2020.03.23.20041707	probably included in Table 3; all confirmed cases; mixture of critical and non-critical patients; no death; demographic data in Table 1	AMG	1	Lou_2020_41707	P23	13	13	Unknown	Exposure	Binding signal relative to controls	0	1	NEG	NA	NA	Estimated	NA
1	Lou_P4541707	10	10	NA	NA	Exact	Exposure	0	Exact	NA	NA	Visual	NA	NA	Binding signal relative to control	1	NA	Figure 2	Total Ab	Serum_Plasma	NA	NA	Severe_Critical	Diseased	ELISA	NP and Spike	SARS-CoV-2	Human	China	Lou	2020	10.1101/2020.03.23.20041707	probably included in Table 3; all confirmed cases; mixture of critical and non-critical patients; no death; demographic data in Table 1	AMG	1	Lou_2020_41707	P45	10	10	Unknown	Exposure	Binding signal relative to controls	0	1	NEG	NA	NA	Estimated	NA
1	Lou_P4541707	12	12	NA	NA	Exact	Exposure	0	Exact	NA	NA	Visual	NA	NA	Binding signal relative to control	1	NA	Figure 2	Total Ab	Serum_Plasma	NA	NA	Severe_Critical	Diseased	ELISA	NP and Spike	SARS-CoV-2	Human	China	Lou	2020	10.1101/2020.03.23.20041707	probably included in Table 3; all confirmed cases; mixture of critical and non-critical patients; no death; demographic data in Table 1	AMG	1	Lou_2020_41707	P45	12	12	Unknown	Exposure	Binding signal relative to controls	0	1	NEG	NA	NA	Estimated	NA
1	Lou_P1341707	11	11	NA	NA	Exact	Exposure	0	Exact	NA	NA	Visual	NA	NA	Binding signal relative to control	1	NA	Figure 2	Total Ab	Serum_Plasma	NA	NA	Mild_Moderate	Diseased	ELISA	NP and Spike	SARS-CoV-2	Human	China	Lou	2020	10.1101/2020.03.23.20041707	probably included in Table 3; all confirmed cases; mixture of critical and non-critical patients; no death; demographic data in Table 1	AMG	1	Lou_2020_41707	P13	11	11	Unknown	Exposure	Binding signal relative to controls	0	1	NEG	NA	NA	Estimated	NA
1	Lou_P1341707	14	14	NA	NA	Exact	Exposure	0	Exact	NA	NA	Visual	NA	NA	Binding signal relative to control	1	NA	Figure 2	Total Ab	Serum_Plasma	NA	NA	Mild_Moderate	Diseased	ELISA	NP and Spike	SARS-CoV-2	Human	China	Lou	2020	10.1101/2020.03.23.20041707	probably included in Table 3; all confirmed cases; mixture of critical and non-critical patients; no death; demographic data in Table 1	AMG	1	Lou_2020_41707	P13	14	14	Unknown	Exposure	Binding signal relative to controls	0	1	NEG	NA	NA	Estimated	NA
1	Lou_P5241707	13	13	NA	NA	Exact	Exposure	0	Exact	NA	NA	Visual	NA	NA	Binding signal relative to control	1	NA	Figure 2	Total Ab	Serum_Plasma	NA	NA	Mild_Moderate	Diseased	ELISA	NP and Spike	SARS-CoV-2	Human	China	Lou	2020	10.1101/2020.03.23.20041707	probably included in Table 3; all confirmed cases; mixture of critical and non-critical patients; no death; demographic data in Table 1	AMG	1	Lou_2020_41707	P52	13	13	Unknown	Exposure	Binding signal relative to controls	0	1	NEG	NA	NA	Estimated	NA
1	Lou_P4741707	17	17	NA	NA	Exact	Exposure	0	Exact	NA	NA	Visual	NA	NA	Binding signal relative to control	1	NA	Figure 2	Total Ab	Serum_Plasma	NA	NA	Severe_Critical	Diseased	ELISA	NP and Spike	SARS-CoV-2	Human	China	Lou	2020	10.1101/2020.03.23.20041707	probably included in Table 3; all confirmed cases; mixture of critical and non-critical patients; no death; demographic data in Table 1	AMG	1	Lou_2020_41707	P47	17	17	Unknown	Exposure	Binding signal relative to controls	0	1	NEG	NA	NA	Estimated	NA
1	Lou_P6641707	17	17	NA	NA	Exact	Exposure	0	Exact	NA	NA	Visual	NA	NA	Binding signal relative to control	1	NA	Figure 2	Total Ab	Serum_Plasma	NA	NA	Mild_Moderate	Diseased	ELISA	NP and Spike	SARS-CoV-2	Human	China	Lou	2020	10.1101/2020.03.23.20041707	probably included in Table 3; all confirmed cases; mixture of critical and non-critical patients; no death; demographic data in Table 1	AMG	1	Lou_2020_41707	P66	17	17	Unknown	Exposure	Binding signal relative to controls	0	1	NEG	NA	NA	Estimated	NA
1	Lou_P2441707	25	25	NA	NA	Exact	Exposure	0	Exact	NA	NA	Visual	NA	NA	Binding signal relative to control	1	NA	Figure 2	Total Ab	Serum_Plasma	NA	NA	Mild_Moderate	Diseased	ELISA	NP and Spike	SARS-CoV-2	Human	China	Lou	2020	10.1101/2020.03.23.20041707	probably included in Table 3; all confirmed cases; mixture of critical and non-critical patients; no death; demographic data in Table 1	AMG	1	Lou_2020_41707	P24	25	25	Unknown	Exposure	Binding signal relative to controls	0	1	NEG	NA	NA	Estimated	NA
1	Lou_P4041707	22	22	NA	NA	Exact	Exposure	0	Exact	NA	NA	Visual	NA	NA	Binding signal relative to control	1	NA	Figure 2	Total Ab	Serum_Plasma	NA	NA	Mild_Moderate	Diseased	ELISA	NP and Spike	SARS-CoV-2	Human	China	Lou	2020	10.1101/2020.03.23.20041707	probably included in Table 3; all confirmed cases; mixture of critical and non-critical patients; no death; demographic data in Table 1	AMG	1	Lou_2020_41707	P40	22	22	Unknown	Exposure	Binding signal relative to controls	0	1	NEG	NA	NA	Estimated	NA
1	Lou_P2641707	25	25	NA	NA	Exact	Exposure	0	Exact	NA	NA	Visual	NA	NA	Binding signal relative to control	1	NA	Figure 2	Total Ab	Serum_Plasma	NA	NA	Mild_Moderate	Diseased	ELISA	NP and Spike	SARS-CoV-2	Human	China	Lou	2020	10.1101/2020.03.23.20041707	probably included in Table 3; all confirmed cases; mixture of critical and non-critical patients; no death; demographic data in Table 1	AMG	1	Lou_2020_41707	P26	25	25	Unknown	Exposure	Binding signal relative to controls	0	1	NEG	NA	NA	Estimated	NA
[truncated: 2,637 more rows]
[truncated: 13 more columns]
